# Supplementary material for: Efficient synthesis of diverse heterobifunctionalized clickable oligo(ethylene glycol) linkers: potential applications in bioconjugation and targeted drug delivery
Source: Royal Society of Chemistry journal article supplement (doi:10.1039/c2ob26968f), 2012-12-21

# Efficient Synthesis of Diverse Heterobifunctionalized Clickable Oligo(ethylene glycol) Linkers: Potential Applications in Bioconjugation and Targeted Drug Delivery

*Lalit N. Goswami, Zachary H. Houston, Saurav J. Sarma, Satish S. Jalisatgi and M. Frederick Hawthorne\**

International Institute of Nano and Molecular Medicine  
School of Medicine, University of Missouri,  
1514 Research Park Drive, Columbia, Missouri 65211-3450 (United States)  
Fax: (+)573.884.6900  
E-mail: [hawthornem@missouri.edu](mailto:hawthornem@missouri.edu)

## SUPPLEMENTARY INFORMATION

### TABLE OF CONTENTS

|                                                                     |    |
|---------------------------------------------------------------------|----|
| S1 – EXPERIMENTAL PROCEDURES AND CHARACTERIZATION .....             | 2  |
| S2 – COPIES OF <sup>1</sup> H NMR, <sup>13</sup> C NMR & HRMS ..... | 12 |

## S1 – EXPERIMENTAL PROCEDURES AND CHARACTERIZATION

*Abbreviations.* Acetonitrile (MeCN), ammonium chloride (NH<sub>4</sub>Cl), dichloromethane (DCM), diethyl ether (Et<sub>2</sub>O), N,N-diisopropylethylamine (DIPEA), N,N'-dimethylformamide (DMF), hydrochloric acid (HCl), lithium aluminum hydride (LAH), methanesulfonyl chloride (MsCl), methanol (MeOH), oligoethylene glycol (OEG), potassium thioacetate (KSAc), sodium azide (NaN<sub>3</sub>), sodium hydride (NaH), sodium iodide (NaI), sodium sulfate (Na<sub>2</sub>SO<sub>4</sub>), tetrahydrofuran (THF), triethylamine (Et<sub>3</sub>N).

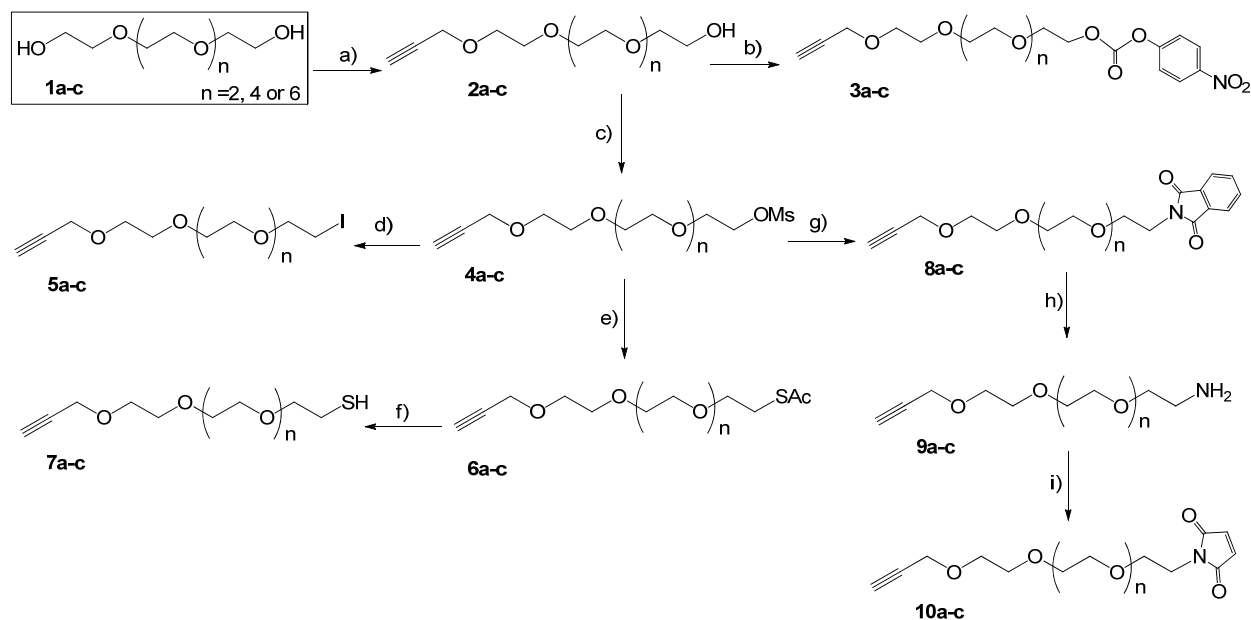

**Scheme 1** Synthesis of alkyne terminated heterobifunctionalized OEG linkers. *Reagents and conditions:* (a) Propargyl bromide, NaH, THF, 0 °C-RT-60 °C, 15 h; (b) 4-nitrophenyl chloroformate, pyridine, MeCN, RT, 15 h; (c) MsCl, Et<sub>3</sub>N, DCM, 0 °C-RT, 3.5 h; (d) NaI, acetone, 65 °C, 15 h; (e) KSAc, DMF, RT, 15 h; (f) LAH, THF, -10 °C-RT, 3 h; (g) Potassium phthalimide, DMF, 110 °C, 15 h; (h) Hydrazine, EtOH, 60 °C, 3 h; (i) N-methoxycarbonyl maleimide, Sat. aq NaHCO<sub>3</sub>, 0 °C-RT, 2 h.

*Synthesis of 2a.* By using the general procedure in the main article with OEG **1a** (5.20 g, 26.8 mmol), NaH (0.15 g, 18.7 mmol), and propargyl bromide (3.18 g, 26.8 mmol), the pure product was obtained as a colorless oil (3.61 g, 58%). <sup>1</sup>H NMR (400 MHz, CDCl<sub>3</sub>) δ = 3.88 (d, *J* = 2.4 Hz, 2H, HCCCH<sub>2</sub>O-), 3.42 (m, 1H, -CH<sub>2</sub>CH<sub>2</sub>OH), 3.42-3.33 (m, 14H, -OCH<sub>2</sub>CH<sub>2</sub>O-), 3.26 (t, *J* = 4.0 Hz, 2H, -CH<sub>2</sub>CH<sub>2</sub>OH), 2.37 ppm (t, *J* = 2.4 Hz, 1H, HCCCH<sub>2</sub>O-). <sup>13</sup>C NMR (100.6 MHz, CDCl<sub>3</sub>) δ = 80.34 (1C), 75.77 (1C), 73.16 (1C), 71.04-70.79 (5C), 69.52 (1C), 61.86 (1C), 58.74 ppm (1C). HRMS (ESI): *m/z* calcd for C<sub>11</sub>H<sub>20</sub>O<sub>5</sub>+Na<sup>+</sup> [*M*+Na]<sup>+</sup> 255.1208; found 255.1016.

*Synthesis of 2b.* By using the general procedure in the main article OEG **1b** (5.27 g, 18.7 mmol), NaH (0.31 g, 13.10 mmol), and propargyl bromide (2.22 g, 18.7 mmol), the pure product was obtained as a colorless oil (2.22 g, 37%). <sup>1</sup>H NMR (400 MHz, CDCl<sub>3</sub>) δ = 4.00 (d, *J* = 2.4 Hz, 2H, HCCCCH<sub>2</sub>O-), 3.49-3.39 (m, 24H, -OCH<sub>2</sub>CH<sub>2</sub>O-), 2.39 ppm (m, 1H, HCCCCH<sub>2</sub>O-). <sup>13</sup>C NMR (100.6 MHz, CDCl<sub>3</sub>) δ = 80.37 (1C), 75.59 (1C), 73.26 (1C), 71.17-70.93 (9C), 69.67 (1C), 62.11 (1C), 58.94 ppm (1C). HRMS (ESI): *m/z* calcd for C<sub>15</sub>H<sub>28</sub>O<sub>7</sub>+Na<sup>+</sup> [*M*+Na]<sup>+</sup> 343.1733; found 343.2077.

*Synthesis of 3a.* By using the general procedure in the main article with **2a** (0.24 g, 1.01 mmol), 4-nitrophenyl chloroformate (0.31 g, 1.52 mmol), and pyridine (0.16 g, 2.02 mmol), the pure product was obtained as a yellow oil (0.30 g, 75%). <sup>1</sup>H NMR (400 MHz, CDCl<sub>3</sub>) δ = 8.13 (d, *J* = 9.2 Hz, 2H, Ar-H-NO<sub>2</sub>), 7.28 (d, *J* = 9.2 Hz, 2H, Ar-H-OCO-), 4.30 (m, 2H, -O-CH<sub>2</sub>CH<sub>2</sub>-OCO-), 4.12 (d, *J* = 2.4 Hz, 2H, HCCCCH<sub>2</sub>O-), 3.67 (m, 2H, -O-CH<sub>2</sub>CH<sub>2</sub>-OCO-), 3.57-3.52 (m, 12H, -OCH<sub>2</sub>CH<sub>2</sub>O-), 2.38 ppm (t, *J* = 2.4 Hz, 1H, HCCCCH<sub>2</sub>O-). <sup>13</sup>C NMR (100.6 MHz, CDCl<sub>3</sub>) δ = 156.25 (1C), 153.12 (1C), 146.02 (1C), 125.97 (2C), 122.59 (2C), 80.47 (1C), 75.48 (1C), 71.31-71.22 (4C), 71.01 (1C), 69.76 (1C), 69.26 (1C), 69.05 (1C), 59.98 ppm (1C). HRMS (ESI): *m/z* calcd for C<sub>18</sub>H<sub>23</sub>NO<sub>9</sub>+Na<sup>+</sup> [*M*+Na]<sup>+</sup> 420.1271; found 420.0280.

*Synthesis of 3b.* By using the general procedure in the main article with **2b** (0.25 g, 0.78 mmol), 4-nitrophenyl chloroformate (0.24 g, 1.17 mmol), and pyridine (0.12 g, 1.56 mmol), the pure product was obtained as a yellow oil (0.27 g, 71%). <sup>1</sup>H NMR (400 MHz, CDCl<sub>3</sub>) δ = 8.21 (d, *J* = 9.2 Hz, 2H, Ar-H-NO<sub>2</sub>), 7.34 (d, *J* = 9.2 Hz, 2H, Ar-H-OCO-), 4.38 (m, 2H, -O-CH<sub>2</sub>CH<sub>2</sub>-OCO-), 4.12 (d, *J* = 2.4 Hz, 2H, HCCCCH<sub>2</sub>O-), 3.75 (m, 2H, -O-CH<sub>2</sub>CH<sub>2</sub>-OCO-), 3.64-3.59 (m, 20H, -OCH<sub>2</sub>CH<sub>2</sub>O-), 2.42 ppm (t, *J* = 2.4 Hz, 1H, HCCCCH<sub>2</sub>O-). <sup>13</sup>C NMR (100.6 MHz, CDCl<sub>3</sub>) δ = 156.29 (1C), 153.20 (1C), 146.12 (1C), 126.03 (2C), 122.58 (2C), 80.48 (1C), 75.42 (1C), 71.43-71.29 (8C), 71.11 (1C), 69.83 (1C), 69.34 (1C), 69.08 (1C), 59.09 ppm (1C). HRMS (ESI): *m/z* calcd for C<sub>22</sub>H<sub>31</sub>NO<sub>11</sub>+Na<sup>+</sup> [*M*+Na]<sup>+</sup> 508.1795; found 508.0996.

*Synthesis of 4a.* By using the general procedure in the main article with **2a** (2.03 g, 8.75 mmol), MsCl (1.50 g, 13.1 mmol), and Et<sub>3</sub>N (1.77 g, 17.5 mmol), the pure product was obtained as a pale yellow oil (2.69 g, 100%). <sup>1</sup>H NMR (400 MHz, CDCl<sub>3</sub>) δ = 4.24 (m, 2H, HCCCCH<sub>2</sub>O-), 4.06 (d, *J* = 2.40 Hz, 2H, -OCH<sub>2</sub>CH<sub>2</sub>-SO<sub>2</sub>CH<sub>3</sub>), 3.64 (m, 2H, -OCH<sub>2</sub>CH<sub>2</sub>-SO<sub>2</sub>CH<sub>3</sub>), 3.57-3.51 (m, 12H, -O-CH<sub>2</sub>CH<sub>2</sub>-O-), 2.96 (s, 3H, -S-(CH<sub>3</sub>)), 2.42 ppm (t, *J* = 4.8 Hz, 1H, HCCCCH<sub>2</sub>O-). <sup>13</sup>C NMR (100.6 MHz, CDCl<sub>3</sub>) δ = 80.49 (1C), 75.59 (1C), 71.23-71.14 (4C), 70.99 (1C), 70.27 (1C), 69.76 (1C), 69.63 (1C), 58.98 (1C), 38.32 ppm (1C). HRMS (ESI): *m/z* calcd for C<sub>12</sub>H<sub>22</sub>O<sub>7</sub>S+Na<sup>+</sup> [*M*+Na]<sup>+</sup> 333.0984; found 333.0419.

*Synthesis of 4b.* By using the general procedure in the main article with **2b** (1.71 g, 5.34 mmol), MsCl (0.92 g, 8.01 mmol), and Et<sub>3</sub>N (1.08 g, 10.7 mmol), the pure product was obtained as a pale yellow oil (2.11 g, 100%). <sup>1</sup>H NMR (400 MHz, CDCl<sub>3</sub>) δ = 4.30 (m, 2H, HCCCH<sub>2</sub>O-), 4.13 (d, *J* = 2.40 Hz, 2H, -OCH<sub>2</sub>CH<sub>2</sub>-SO<sub>2</sub>CH<sub>3</sub>), 3.70 (m, 2H, -OCH<sub>2</sub>CH<sub>2</sub>-SO<sub>2</sub>CH<sub>3</sub>), 3.63-3.57 (m, 20H, -O-CH<sub>2</sub>CH<sub>2</sub>-O-), 3.02 (s, 3H, -S-(CH<sub>3</sub>)), 2.42 ppm (t, *J* = 2.4 Hz, 1H, HCCCH<sub>2</sub>O-). <sup>13</sup>C NMR (100.6 MHz, CDCl<sub>3</sub>) δ = 80.48 (1C), 75.44 (1C), 71.34-71.22 (8C), 71.10 (1C), 70.17 (1C), 69.83 (1C), 69.72 (1C), 59.08 (1C), 38.43 ppm (1C). HRMS (ESI): *m/z* calcd for C<sub>16</sub>H<sub>30</sub>O<sub>9</sub>S+Na<sup>+</sup> [*M*+Na]<sup>+</sup> 421.1508; found 421.1120; for C<sub>16</sub>H<sub>30</sub>O<sub>9</sub>S+K<sup>+</sup> [*M*+K]<sup>+</sup> 437.1248; found 437.0769.

*Synthesis of 5a.* By using the general procedure in the main article with **4a** (0.24 g, 7.67 mmol) and NaI (0.46 g, 3.07 mmol), the pure product was obtained as a pale yellow oil (0.19 g, 74%). <sup>1</sup>H NMR (400 MHz, CDCl<sub>3</sub>) δ = 4.15 (d, *J* = 2.4 Hz, 2H, HCCCH<sub>2</sub>O-), 3.70 (t, *J* = 6.8 Hz, -OCH<sub>2</sub>CH<sub>2</sub>I, 2H), 3.66-3.61 (m, 12H, -OCH<sub>2</sub>CH<sub>2</sub>-O), 3.22 (t, *J* = 6.8 Hz, 2H, -OCH<sub>2</sub>CH<sub>2</sub>I), 2.42 ppm (t, *J* = 2.4 Hz, 1H, HCCCH<sub>2</sub>O-). <sup>13</sup>C NMR (100.6 MHz, CDCl<sub>3</sub>) δ = 80.48 (1C), 75.43 (1C), 72.72 (1C), 71.41-71.34 (3C), 71.18 (1C), 70.98 (1C), 69.87 (1C), 59.16 (1C), 3.86 ppm (1C). HRMS (ESI): *m/z* calcd for C<sub>11</sub>H<sub>19</sub>IO<sub>4</sub>+H<sup>+</sup> [*M*+H]<sup>+</sup> 343.0406; found 342.9579.

*Synthesis of 5b.* By using the general procedure in the main article with **4b** (0.24 g, 0.60 mmol) and NaI (0.36 g, 2.38 mmol), the pure product was obtained as a pale yellow oil (0.20 g, 78%). <sup>1</sup>H NMR (400 MHz, CDCl<sub>3</sub>) δ = 4.13 (d, *J* = 2.4 Hz, 2H, HCCCH<sub>2</sub>O-), 3.69 (t, 2H, *J* = 6.8 Hz, -OCH<sub>2</sub>CH<sub>2</sub>I), 3.64-3.58 (m, 20H, -OCH<sub>2</sub>CH<sub>2</sub>-O), 3.19 (t, *J* = 6.8 Hz, 2H, -OCH<sub>2</sub>CH<sub>2</sub>I), 2.42 ppm (t, *J* = 2.4 Hz, 1H, HCCCH<sub>2</sub>O-). <sup>13</sup>C NMR (100.6 MHz, CDCl<sub>3</sub>) δ = 80.46 (1C), 75.46 (1C), 72.69 (1C), 71.41-71.31 (7C), 71.13 (1C), 70.96 (1C), 69.84 (1C), 59.13 (1C), 3.85 ppm (1C). HRMS (ESI): *m/z* calcd for C<sub>15</sub>H<sub>27</sub>IO<sub>6</sub>+Na<sup>+</sup> [*M*+Na]<sup>+</sup> 453.0750; found 453.0149; for C<sub>15</sub>H<sub>27</sub>IO<sub>6</sub>+K<sup>+</sup> [*M*+K]<sup>+</sup> 469.0489, found 469.0003.

*Synthesis of 6a.* By using the general procedure in the main article with **4a** (0.20 g, 0.64 mmol) and KSAc (0.11 g, 9.66 mmol), the pure product was obtained as a colorless oil (0.19 g, 99%). <sup>1</sup>H NMR (400 MHz, CDCl<sub>3</sub>) δ = 4.18 (d, *J* = 2.4 Hz, 2H, HCCCH<sub>2</sub>O-), 3.69-3.56 (m, 14H, -OCH<sub>2</sub>CH<sub>2</sub>O-), 3.07 (t, *J* = 6.4 Hz, 2H, -OCH<sub>2</sub>CH<sub>2</sub>-SCOCH<sub>3</sub>), 2.43 (t, *J* = 2.4 Hz, 1H, HCCCH<sub>2</sub>O-), 2.31 ppm (s, 3H, -OCH<sub>2</sub>CH<sub>2</sub>-SCOCH<sub>3</sub>). <sup>13</sup>C NMR (100.6 MHz, CDCl<sub>3</sub>) δ = 196.18 (1C), 80.47 (1C), 75.33 (1C), 71.39-71.09, (5C), 70.51 (1C), 69.88 (1C), 59.15 (1C), 31.32 (1C), 29.62 ppm (1C). HRMS (ESI): *m/z* calcd for C<sub>13</sub>H<sub>22</sub>O<sub>5</sub>S+Na<sup>+</sup> [*M*+Na]<sup>+</sup> 313.1086; found 313.1276.

*Synthesis of 6b.* By using the general procedure in the main article with **4b** (0.25 g, 0.63 mmol) and KSAc (0.11 g, 0.94 mmol), the pure product was obtained as a colorless oil (0.22 g, 97%). <sup>1</sup>H NMR (400 MHz,



$\text{CDCl}_3$ )  $\delta = 4.10$  (d,  $J = 2.4$  Hz, 2H,  $\text{HCCCH}_2\text{O}-$ ), 3.60-3.48 (m, 22H,  $-\text{OCH}_2\text{CH}_2\text{O}-$ ), 2.98 (t,  $J = 6.4$  Hz, 2H,  $-\text{OCH}_2\text{CH}_2-\text{SCOCH}_3$ ), 2.40 (t,  $J = 2.4$  Hz, 1H,  $\text{HCCCH}_2\text{O}-$ ), 2.24 ppm (s, 3H,  $-\text{OCH}_2\text{CH}_2-\text{SCOCH}_3$ ).  $^{13}\text{C}$  NMR (100.6 MHz,  $\text{CDCl}_3$ )  $\delta = 196.00$  (1C), 80.43 (1C), 75.44 (1C), 71.34-71.02, (8C), 71.09 (1C), 71.02 (1C), 70.44 (1C), 59.06 (1C), 31.26 (1C), 29.53 ppm (1C). HRMS (ESI):  $m/z$  calcd for  $\text{C}_{17}\text{H}_{30}\text{O}_7\text{S}+\text{Na}^+$  [ $M+\text{Na}$ ] $^+$  401.1610; found 401.1097.

*Synthesis of 7a.* By using the general procedure in the main article with **6a** (0.19 g, 0.64 mmol) and LAH (0.12 g, 3.18 mmol), the pure product was obtained as a pale yellow oil (0.15 g, 92%).  $^1\text{H}$  NMR (400 MHz,  $\text{CDCl}_3$ )  $\delta = 4.18$  (d,  $J = 2.4$  Hz, 2H,  $\text{HCCCH}_2\text{O}-$ ), 3.69-3.56 (m, 14H,  $-\text{OCH}_2\text{CH}_2\text{O}-$ ), 2.68 (m, 2H,  $-\text{OCH}_2\text{CH}_2\text{SH}$ ), 2.43 (t,  $J = 2.4$  Hz, 1H,  $\text{HCCCH}_2\text{O}-$ ), 1.58 (t,  $J = 8.4$  Hz, 1H,  $-\text{OCH}_2\text{CH}_2\text{SH}$ ).  $^{13}\text{C}$  NMR (100.6 MHz,  $\text{CDCl}_3$ )  $\delta = 80.46$  (1C), 75.34 (1C), 73.65 (1C), 71.40-71.01 (5C), 69.89 (1C), 59.16 (1C), 25.04 ppm (1C). HRMS (ESI):  $m/z$  calcd for  $\text{C}_{11}\text{H}_{20}\text{O}_4\text{S}+\text{Na}^+$  [ $M+\text{Na}$ ] $^+$  271.0980; found 271.0797.

*Synthesis of 7b.* By using the general procedure in the main article with **6b** (0.03 g, 0.08 mmol) and LAH (0.01 g, 0.24 mmol), the pure product was obtained as a pale yellow oil (0.02 g, 83%).  $^1\text{H}$  NMR (400 MHz,  $\text{CDCl}_3$ )  $\delta = 4.22$  (d,  $J = 2.4$  Hz, 2H,  $\text{HCCCH}_2\text{O}-$ ), 3.72-3.62 (m, 22H,  $-\text{OCH}_2\text{CH}_2\text{O}-$ ), 2.72 (m, 2H,  $-\text{OCH}_2\text{CH}_2\text{SH}$ ), 2.45 (t,  $J = 2.4$  Hz, 1H,  $\text{HCCCH}_2\text{O}-$ ), 1.61 ppm (t,  $J = 8.0$  Hz, 1H,  $-\text{OCH}_2\text{CH}_2\text{SH}$ ).  $^{13}\text{C}$  NMR (100.6 MHz,  $\text{CDCl}_3$ )  $\delta = 80.49$  (1C), 75.32 (1C), 73.71 (1C), 71.47-71.36 (7C), 71.23 (1C), 71.06 (1C), 69.94 (1C), 59.22 (1C), 25.08 (1C). HRMS (ESI):  $m/z$  calcd for  $\text{C}_{15}\text{H}_{28}\text{O}_6\text{S}+\text{Na}^+$  [ $M+\text{Na}$ ] $^+$  359.1504; found 359.1524.

*Synthesis of 8a.* By using the general procedure in the main article with **4a** (2.29 g, 7.36 mmol) and potassium phthalimide (2.04 g, 11.04 mmol), the pure product was obtained as a yellow oil (2.64 g, 99%).  $^1\text{H}$  NMR (400 MHz,  $\text{CDCl}_3$ )  $\delta = 7.82$  (m, 2H, Ar-H), 7.70 (m, 2H, Ar-H), 4.17 (m, 2H,  $\text{HCCCH}_2\text{O}-$ ), 3.87 (t,  $J = 6.0$  Hz, 2H,  $-\text{OCH}_2\text{CH}_2-\text{NPhth}$ ), 3.71 (t,  $J = 3.2$  Hz, 2H,  $-\text{OCH}_2\text{CH}_2-\text{NPhth}$ ), 3.64-3.55 (m, 14H,  $-\text{OCH}_2\text{CH}_2\text{O}-$ ), 2.43 ppm (t,  $J = 2.4$  Hz, 1H,  $\text{HCCCH}_2\text{O}-$ ).  $^{13}\text{C}$  NMR (100.6 MHz,  $\text{CDCl}_3$ )  $\delta = 169.06$  (2C), 134.70 (2C), 132.91 (2C), 123.98 (2C), 80.49 (1C), 75.35 (1C), 71.35-71.32 (3C), 71.12 (1C), 70.87 (1C), 69.86 (1C), 68.66 (1C), 59.13 (1C), 38.06 ppm (1C). HRMS (ESI):  $m/z$  calcd for  $\text{C}_{19}\text{H}_{23}\text{NO}_6+\text{Na}^+$  [ $M+\text{Na}$ ] $^+$  384.1423; found 384.0653.

*Synthesis of 8b.* By using the general procedure in the main article with **4b** (1.73 g, 4.34 mmol) and potassium phthalimide (1.21 g, 6.52 mmol), the pure product was obtained as a yellow oil (1.80 g, 92%).  $^1\text{H}$  NMR (400 MHz,  $\text{CDCl}_3$ )  $\delta = 7.79$  (m, 2H, Ar-H), 7.68 (m, 2H, Ar-H), 4.15 (d,  $J = 4.4$  Hz, 2H,  $\text{HCCCH}_2\text{O}-$ ), 3.85 (t,  $J = 5.6$  Hz, 2H,  $-\text{OCH}_2\text{CH}_2-\text{NPhth}$ ), 3.71-3.53 (m, 22H,  $-\text{OCH}_2\text{CH}_2\text{O}-$ ), 2.43 ppm (t,  $J = 2.4$  Hz, 1H,  $\text{HCCCH}_2\text{O}-$ ).  $^{13}\text{C}$  NMR (100.6 MHz,  $\text{CDCl}_3$ )  $\delta = 169.96$  (2C), 134.70 (2C), 132.88 (2C),

123.97 (2C), 80.47 (1C), 75.40 (1C), 71.34-71.28 (7C), 71.13 (1C), 70.84 (1C), 69.85 (1C), 68.64 (1C), 59.12 (1C), 38.03 ppm (1C). HRMS (ESI):  $m/z$  calcd for  $C_{23}H_{31}NO_8+Na^+$   $[M+Na]^+$  472.1942; found 472.1947.

*Synthesis of 9a.* By using the general procedure in the main article with **8a** (2.63 g, 7.28 mmol) and hydrazine (2.60 g, 81.25 mmol), the pure product was obtained as a pale yellow oil (1.67 g, 99%).  $^1H$  NMR (400 MHz,  $CDCl_3$ )  $\delta$  = 3.93 (m, 2H,  $HCCCH_2O-$ ), 3.42-3.36 (m, 14H,  $-OCH_2CH_2O-$ ), 3.22 (m, 2H,  $-OCH_2CH_2NH_2$ ), 2.57 (m, 2H,  $-OCH_2CH_2NH_2$ ), 2.32 ppm (m, 1H,  $-HCCCH_2O-$ ).  $^{13}C$  NMR (100.6 MHz,  $CDCl_3$ )  $\delta$  = 80.31 (1C), 75.47 (1C), 73.98 (1C), 71.12-71.01 (3C), 70.91 (1C), 70.80 (1C), 69.61 (1C), 58.86 (1C), 42.34 ppm (1C). HRMS (ESI):  $m/z$  calcd for  $C_{11}H_{21}NO_4+H^+$   $[M+H]^+$  232.1549; found 232.1547.

*Synthesis of 9b.* By using the general procedure in the main article with **8b** (1.70 g, 3.78 mmol) and hydrazine (1.70 g, 63.8 mmol), the pure product was obtained as a pale yellow oil (1.20 g, 99%).  $^1H$  NMR (400 MHz,  $CDCl_3$ )  $\delta$  = 3.98 (d,  $J$  = 2.4 Hz, 2H,  $HCCCH_2O-$ ), 3.48-3.39 (m, 22H,  $-OCH_2CH_2O-$ ), 3.28 (t,  $J$  = 5.2 Hz, 2H,  $-OCH_2CH_2NH_2$ ), 2.63 (t,  $J$  = 5.2 Hz, 2H,  $-OCH_2CH_2NH_2$ ), 2.34 ppm (t,  $J$  = 2.4 Hz, 1H,  $-HCCCH_2O-$ ).  $^{13}C$  NMR (100.6 MHz,  $CDCl_3$ )  $\delta$  = 80.33 (1C), 75.48 (1C), 74.02 (1C), 71.17-71.09 (7C), 70.96 (1C), 70.87 (1C), 69.66 (1C), 58.92 (1C), 42.39 ppm (1C). HRMS (ESI):  $m/z$  calcd for  $C_{15}H_{29}NO_6+H^+$   $[M+H]^+$  320.2073; found 320.1923.

*Synthesis of 10a.* By using the general procedure in the main article with **9a** (0.21 g, 0.91 mmol) and N-methoxycarbonyl maleimide (0.14 g, 0.91 mmol), the pure product was obtained as a pale yellow oil (0.14 g, 49%).  $^1H$  NMR (400 MHz,  $CDCl_3$ )  $\delta$  = 6.67 (s, 2H, Mal-H), 4.14 (d,  $J$  = 2.4 Hz, 2H,  $-HCCCH_2O-$ ), 3.67-3.54 (m, 16H,  $-OCH_2CH_2O-$ ), 2.42 ppm (t,  $J$  = 2.4 Hz, 1H,  $HCCCH_2O-$ ).  $^{13}C$  NMR (100.6 MHz,  $CDCl_3$ )  $\delta$  = 171.40 (2C), 134.93 (2C), 80.47 (1C), 75.40 (1C), 71.32-71.28 (3C), 71.11 (1C), 70.79 (1C), 69.84 (1C), 68.53 (1C), 59.10 (1C), 37.88 ppm (1C). HRMS (ESI):  $m/z$  calcd for  $C_{15}H_{21}NO_6+Na^+$   $[M+Na]^+$  334.1261; found 334.1267.

*Synthesis of 10b.* By using the general procedure in the main article with **9b** (0.24 g, 0.75 mmol) and N-methoxycarbonyl maleimide (0.12 g, 0.75 mmol), the pure product was obtained as a pale yellow oil (0.18 g, 63%).  $^1H$  NMR (400 MHz,  $CDCl_3$ )  $\delta$  = 6.64 (s, 2H, Mal-H), 4.10 (d,  $J$  = 2.4 Hz, 2H,  $-HCCCH_2O-$ ), 3.64-3.49 (m, 24H,  $-OCH_2CH_2O-$ ), 2.41 ppm (t,  $J$  = 2.4 Hz, 1H,  $HCCCH_2O-$ ).  $^{13}C$  NMR (100.6 MHz,  $CDCl_3$ )  $\delta$  = 171.37 (2C), 134.94 (2C), 80.45 (1C), 75.45 (1C), 71.30-71.23 (7C), 71.08 (1C), 70.76 (1C), 69.80 (1C), 68.48 (1C), 59.06 (1C), 37.84 ppm (1C). HRMS (ESI):  $m/z$  calcd for  $C_{19}H_{29}NO_8+Na^+$   $[M+Na]^+$  422.1791; found 422.1298.

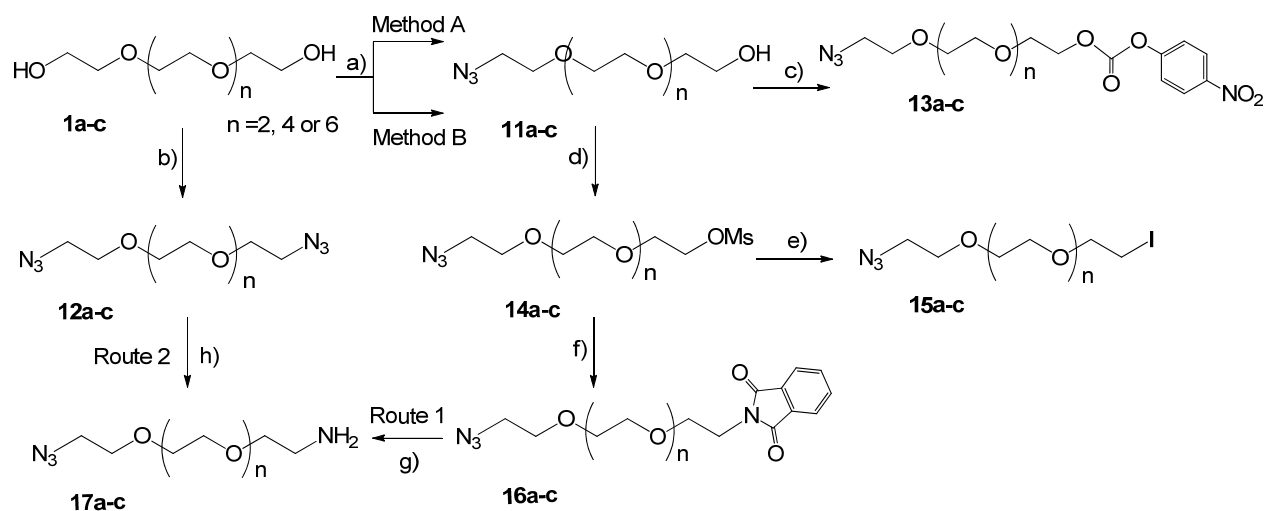

**Scheme 2** Sequential synthesis of azide terminated heterobifunctionalized OEG linkers. *Reagents and conditions:* (a) Method A: (i) MsCl,  $\text{Et}_3\text{N}$ , DCM,  $0\text{ }^\circ\text{C}$ -RT, 3 h; (ii)  $\text{NaN}_3$ , DMF,  $65\text{ }^\circ\text{C}$ , 15 h; Method B: (i) MsCl,  $\text{Ag}_2\text{O}$ , DCM,  $0\text{ }^\circ\text{C}$ -RT, 24 h; (ii)  $\text{NaN}_3$ , DMF,  $65\text{ }^\circ\text{C}$ , 15 h; (b) (i) MsCl,  $\text{Et}_3\text{N}$ , DCM,  $0\text{ }^\circ\text{C}$ -RT, 4 h; (ii)  $\text{NaN}_3$ , DMF,  $65\text{ }^\circ\text{C}$ , 15 h; (c) 4-nitrophenyl chloroformate, pyridine, MeCN, RT, 15 h; (d) MsCl,  $\text{Et}_3\text{N}$ , DCM,  $0\text{ }^\circ\text{C}$ -RT, 3.5 h; (e) NaI, acetone,  $65\text{ }^\circ\text{C}$ , 15 h; (f) Potassium phthalimide, DMF,  $110\text{ }^\circ\text{C}$ , 15 h; (g) Hydrazine, EtOH,  $60\text{ }^\circ\text{C}$ , 3 h; (h)  $\text{Ph}_3\text{P}$ ,  $\text{Et}_2\text{O}$ -5% aq HCl, RT, 24 h.

### Synthesis of **11a**

By using the general procedure in the main article for Method A with OEG **1a** (5.19 g, 26.7 mmol), MsCl (2.76 g, 24.1 mmol),  $\text{Et}_3\text{N}$  (4.05 g, 40.1 mmol), and  $\text{NaN}_3$  (8.69 g, 134 mmol), the pure product was obtained as a pale yellow oil (1.90 g, 36%). By using the general procedure in the main article for Method B with OEG **1a** (1.00 g, 5.15 mmol),  $\text{Ag}_2\text{O}$  (1.79 g, 7.72 mmol), and MsCl (651 mg, 5.66 mmol), the pure product was obtained as a pale yellow oil (774 mg, 69%):  $^1\text{H-NMR}$  (400 MHz,  $\text{CDCl}_3$ )  $\delta = 3.62$ -3.58 (m, 12H,  $-\text{OCH}_2\text{CH}_2\text{O}-$ ), 3.51 (m, 2H,  $-\text{OCH}_2\text{CH}_2\text{OH}$ ), 3.30 (t,  $J = 4.8$  Hz, 2H,  $\text{N}_3\text{CH}_2\text{CH}_2\text{O}-$ ), 3.10 ppm (t,  $J = 6.0$  Hz,  $-\text{OCH}_2\text{CH}_2\text{OH}$ ).  $^{13}\text{C-NMR}$  (100.6 MHz,  $\text{CDCl}_3$ )  $\delta = 73.28$  (1C), 71.37-71.13 (3C), 71.02 (1C), 70.72 (1C), 62.29 (1C), 51.35 ppm (1C). HRMS (ESI):  $m/z$  calcd for  $\text{C}_8\text{H}_{17}\text{N}_3\text{O}_4 + \text{Na}^+$   $[M + \text{Na}]^+$  242.1111; found 242.0553.

### Synthesis of **11b**

By using the general procedure in the main article for Method A with OEG **1b** (5.25 g, 18.6 mmol), MsCl (1.92 g, 16.8 mmol),  $\text{Et}_3\text{N}$  (2.82 g, 27.9 mmol), and  $\text{NaN}_3$  (6.04 g, 93.0 mmol), the pure product was obtained as a pale yellow oil (2.11 g, 37%). By using the general procedure in the main article for

Method B with OEG **1b** (500 mg, 1.77 mmol), Ag<sub>2</sub>O (616 mg, 2.66 mmol), KI (59.0 mg, 0.35 mmol), and MsCl (223 mg, 1.95 mmol), the pure product was obtained as a pale yellow oil (293 mg, 54%): <sup>1</sup>H-NMR (500 MHz, CDCl<sub>3</sub>) δ = 3.52-3.47 (m, 18H, -OCH<sub>2</sub>CH<sub>2</sub>O-), 3.40 (m, 4H, N<sub>3</sub>CH<sub>2</sub>CH<sub>2</sub>O- & -OCH<sub>2</sub>CH<sub>2</sub>OH), 3.21 ppm (t, *J* = 5.0 Hz, 2H, N<sub>3</sub>CH<sub>2</sub>CH<sub>2</sub>O-). <sup>13</sup>C-NMR (125.8 MHz, CDCl<sub>3</sub>) δ = 72.44 (1C), 70.33-70.25 (7C), 70.04 (1C), 69.77 (1C), 61.20 (1C), 50.38 ppm (1C). HRMS (ESI): *m/z* calcd for C<sub>12</sub>H<sub>25</sub>N<sub>3</sub>O<sub>6</sub>+Na<sup>+</sup> [*M*+Na]<sup>+</sup> 330.1636; found 330.1119; for C<sub>12</sub>H<sub>25</sub>N<sub>3</sub>O<sub>6</sub>+K<sup>+</sup> [*M*+K]<sup>+</sup> 346.1375; found 346.0851.

#### *Synthesis of 12a*

By using the general procedure in the main article with OEG **1a** (1.03 g, 5.30 mmol), MsCl (1.84 g, 15.9 mmol), Et<sub>3</sub>N (1.61 g, 15.9 mmol), and NaN<sub>3</sub> (1.72 g, 26.5 mmol), the pure product was obtained as a pale yellow oil (1.30 g, 100%): <sup>1</sup>H-NMR (400 MHz, CDCl<sub>3</sub>) δ = 3.47 (m, 12H, -OCH<sub>2</sub>CH<sub>2</sub>O-), 3.25 ppm (t, *J* = 5.0 Hz, 4H, N<sub>3</sub>CH<sub>2</sub>CH<sub>2</sub>O-). <sup>13</sup>C-NMR (100.6 MHz, CDCl<sub>3</sub>) δ = 71.26-71.20 (4C), 70.60 (2C), 51.25 ppm (2C). HRMS (ESI): *m/z* calcd for C<sub>8</sub>H<sub>16</sub>N<sub>6</sub>O<sub>3</sub>+Na<sup>+</sup> [*M*+Na]<sup>+</sup> 267.1176; found 267.1507.

#### *Synthesis of 12b*

By using the general procedure in the main article with OEG **1b** (200 mg, 0.708 mmol), MsCl (244 mg, 2.13 mmol), Et<sub>3</sub>N (215 mg, 2.13 mmol), and NaN<sub>3</sub> (230 mg, 3.54 mmol), the pure product was obtained as a pale yellow oil (235 mg, 100%): <sup>1</sup>H-NMR (500 MHz, CDCl<sub>3</sub>) δ = 3.53 (m, 20H, -OCH<sub>2</sub>CH<sub>2</sub>O-), 3.25 ppm (t, *J* = 5.0 Hz, 4H, N<sub>3</sub>CH<sub>2</sub>CH<sub>2</sub>O-). <sup>13</sup>C-NMR (125.8 MHz, CDCl<sub>3</sub>) δ = 71.42-71.35 (8C), 69.81 (2C), 50.44 ppm (2C). HRMS (ESI): *m/z* calcd for C<sub>12</sub>H<sub>24</sub>N<sub>6</sub>O<sub>5</sub>+Na<sup>+</sup> [*M*+Na]<sup>+</sup> 355.1700; found 355.1082.

#### *Synthesis of 13a*

By using the general procedure in the main article with **11a** (253 mg, 1.15 mmol), 4-nitrophenyl chloroformate (349 mg, 1.73 mmol), and pyridine (183 mg, 2.13 mmol), the pure product was obtained as a pale yellow oil (417 mg, 94%): <sup>1</sup>H-NMR: (400 MHz, CDCl<sub>3</sub>) δ = 8.24 (d, *J* = 5.2 Hz, 2H, Ar-H-NO<sub>2</sub>), 7.36 (d, *J* = 5.2 Hz, 2H, Ar-H-OCO-), 4.41 (t, *J* = 1.6 Hz, 2H, -O-CH<sub>2</sub>CH<sub>2</sub>-OCO-), 3.79 (t, *J* = 1.6 Hz, 2H, -O-CH<sub>2</sub>CH<sub>2</sub>-OCO-), 3.66 (m, 10H, -OCH<sub>2</sub>CH<sub>2</sub>O-), 3.36 ppm (t, *J* = 4.8 Hz, 2H, N<sub>3</sub>CH<sub>2</sub>CH<sub>2</sub>O-). <sup>13</sup>C-NMR (100.6 MHz, CDCl<sub>3</sub>) δ = 156.33 (1C), 153.23 (1C), 146.14 (1C), 126.04 (2C), 122.58 (2C), 71.44 (4C), 70.79 (1C), 69.37 (1C), 69.11 (1C), 51.44 ppm (1C). HRMS (ESI): *m/z* calcd for C<sub>15</sub>H<sub>20</sub>N<sub>4</sub>O<sub>8</sub>+Na<sup>+</sup> [*M*+Na]<sup>+</sup> 407.1173; found 407.0414.

#### *Synthesis of 13b*

By using the general procedure in the main article with **11b** (100 mg, 0.33 mmol), 4-nitrophenyl chloroformate (98.3 mg, 0.49 mmol), and pyridine (51.5 mg, 0.65 mmol), the pure product was obtained as a pale yellow oil (134 mg, 87%):  $^1\text{H-NMR}$ : (500 MHz,  $\text{CDCl}_3$ )  $\delta$  = 8.32 (d,  $J$  = 5.0 Hz, 2H, Ar-H- $\text{NO}_2$ ), 7.44 (d,  $J$  = 5.0 Hz, 2H, Ar-H-OCO-), 4.49 (m, 2H, -O- $\text{CH}_2\text{CH}_2$ -OCO-), 3.86 (m, 2H, -O- $\text{CH}_2\text{CH}_2$ -OCO-), 3.71 (m, 18H, -O $\text{CH}_2\text{CH}_2$ O-), 3.43 ppm (t,  $J$  = 5.0 Hz, 2H,  $\text{N}_3\text{CH}_2\text{CH}_2$ O-).  $^{13}\text{C-NMR}$  (100.6 MHz,  $\text{CDCl}_3$ )  $\delta$  = 155.51 (1C), 152.45 (1C), 145.34 (1C), 125.27 (2C), 121.79 (2C), 70.67-70.55 (8C), 69.99 (1C), 68.58 (1C), 68.30 (1C), 50.64 ppm (1C). HRMS (ESI):  $m/z$  calcd for  $\text{C}_{19}\text{H}_{28}\text{N}_4\text{O}_{10}+\text{Li}^+$  [ $M+\text{Li}$ ] $^+$  479.1960; found 479.1313; for  $\text{C}_{19}\text{H}_{28}\text{N}_4\text{O}_{10}+\text{Na}^+$  [ $M+\text{Na}$ ] $^+$  495.1698; found 495.1131.

#### *Synthesis of 14a*

By using the general procedure in the main article with **11a** (1.15 g, 5.25 mmol), MsCl (901 mg, 7.86 mmol), and  $\text{Et}_3\text{N}$  (1.06 g, 10.5 mmol), the pure product was obtained as a pale yellow oil (1.54 g, 99%):  $^1\text{H-NMR}$  (400 MHz,  $\text{CDCl}_3$ )  $\delta$  = 4.35 (m, 2H, -O $\text{CH}_2\text{CH}_2$ OMs), 3.75 (m, 2H,  $\text{N}_3\text{CH}_2\text{CH}_2$ O-), 3.65 (m, 10H, -O $\text{CH}_2\text{CH}_2$ O-), 3.37 (t,  $J$  = 4.8 Hz, 2H,  $\text{N}_3\text{CH}_2\text{CH}_2$ O-), 3.06 ppm (s, 3H, -OSO $_2$ CH $_3$ ).  $^{13}\text{C-NMR}$  (100.6 MHz,  $\text{CDCl}_3$ )  $\delta$  = 71.44-71.37 (4C), 70.79 (1C), 70.17 (1C), 69.77 (1C), 51.45 (1C), 38.42 ppm (1C). HRMS:  $m/z$  calcd for  $\text{C}_9\text{H}_{19}\text{N}_3\text{O}_6\text{S}+\text{Na}^+$  [ $M+\text{Na}$ ] $^+$  320.0887; found 320.0583.

#### *Synthesis of 14b*

By using the general procedure in the main article with **11b** (1.10 g, 3.59 mmol), MsCl (616 mg, 5.38 mmol), and  $\text{Et}_3\text{N}$  (724 mg, 7.17 mmol), the pure product was obtained as a pale yellow oil (1.37 g, 99%):  $^1\text{H-NMR}$  (500 MHz,  $\text{CDCl}_3$ )  $\delta$  = 4.41 (m, 2H, -O $\text{CH}_2\text{CH}_2$ OMs), 3.80 (m, 2H,  $\text{N}_3\text{CH}_2\text{CH}_2$ O-), 3.69 (m, 18H, -O $\text{CH}_2\text{CH}_2$ O-), 3.43 (t,  $J$  = 5.0 Hz, 2H,  $\text{N}_3\text{CH}_2\text{CH}_2$ O-), 3.12 ppm (s, 3H, -OSO $_2$ CH $_3$ ).  $^{13}\text{C-NMR}$  (125.8 MHz,  $\text{CDCl}_3$ )  $\delta$  = 71.61-71.52 (6C), 70.45 (1C), 69.96 (1C), 69.40 (1C), 68.95 (1C), 50.62 (1C), 37.67 (1C), 31.58 ppm (1C). HRMS (ESI):  $m/z$  calcd for  $\text{C}_{13}\text{H}_{27}\text{N}_3\text{O}_8\text{S}+\text{Na}^+$  [ $M+\text{Na}$ ] $^+$  408.1411; found 408.0851; for  $\text{C}_{13}\text{H}_{27}\text{N}_3\text{O}_8\text{S}+\text{C}_6\text{H}_{16}\text{N}^+$  [ $M+\text{C}_6\text{H}_{16}\text{N}$ ] $^+$  487.2769; found 487.2290.

#### *Synthesis of 15a*

By using the general procedure in the main article with **14a** (200 mg, 0.67 mmol) and sodium iodide (403 mg, 2.69 mmol), the pure product was obtained as a pale yellow oil (213 mg, 96%):  $^1\text{H-NMR}$  (400 MHz,  $\text{CDCl}_3$ )  $\delta$  = 3.73 (t,  $J$  = 6.8 Hz, 2H, -O $\text{CH}_2\text{CH}_2$ I), 3.65 (m, 10H, -O $\text{CH}_2\text{CH}_2$ O-), 3.37 (t,  $J$  = 4.8 Hz, 2H,  $\text{N}_3\text{CH}_2\text{CH}_2$ O-), 3.24 ppm (t,  $J$  = 6.8 Hz, 2H, -O $\text{CH}_2\text{CH}_2$ I).  $^{13}\text{C-NMR}$  (100.6 MHz,  $\text{CDCl}_3$ )  $\delta$  = 72.73 (1C), 71.49-71.46 (3C), 71.01 (1C), 70.84 (1C), 51.48 (1C), 3.85 ppm (1C). HRMS (ESI):  $m/z$  calcd for  $\text{C}_8\text{H}_{16}\text{IN}_3\text{O}_3+\text{Na}^+$  [ $M+\text{Na}$ ] $^+$  352.0129; found 351.9791.

### Synthesis of **15b**

By using the general procedure in the main article with **14b** (117 mg, 0.30 mmol) and sodium iodide (182 mg, 1.21 mmol), the pure product was obtained as a pale yellow oil (77.3 mg, 61%):  $^1\text{H-NMR}$  (500 MHz,  $\text{CDCl}_3$ )  $\delta$  = 3.81 (t,  $J$  = 10.0 Hz, 2H,  $-\text{OCH}_2\text{CH}_2\text{I}$ ), 3.72 (m, 18H,  $-\text{OCH}_2\text{CH}_2\text{O}-$ ), 3.44 (t,  $J$  = 5.0 Hz, 2H,  $\text{N}_3\text{CH}_2\text{CH}_2\text{O}-$ ), 3.31 ppm (t,  $J$  = 5.0 Hz, 2H,  $-\text{OCH}_2\text{CH}_2\text{I}$ ).  $^{13}\text{C-NMR}$  (125.8 MHz,  $\text{CDCl}_3$ )  $\delta$  = 71.19 (1C), 71.68-71.57 (7C), 70.20 (1C), 70.02 (1C), 50.66 (1C), 3.01 ppm (1C). HRMS:  $m/z$  calcd for  $\text{C}_{12}\text{H}_{24}\text{IN}_3\text{O}_5+\text{Na}^+$  [ $M+\text{Na}$ ] $^+$  440.0653; found 440.0297.

### Synthesis of **16a**

By using the general procedure in the main article with **14a** (850 mg, 2.86 mmol) and potassium phthalimide (688 mg, 3.72 mmol), the pure product was obtained as a yellow oil (956 mg, 96%):  $^1\text{H-NMR}$  (400 MHz,  $\text{CDCl}_3$ )  $\delta$  = 7.78 (m, 2H, Ar-H), 7.67 (m, 2H, Ar-H), 3.85 (t,  $J$  = 5.6 Hz, 2H,  $-\text{OCH}_2\text{CH}_2\text{NPhth}$ ), 3.70 (t,  $J$  = 6.0 Hz, 2H,  $-\text{OCH}_2\text{CH}_2\text{NPhth}$ ), 3.58 (m, 10H,  $-\text{OCH}_2\text{CH}_2\text{O}-$ ), 3.32 ppm (t,  $J$  = 4.8 Hz, 2H,  $\text{N}_3\text{CH}_2\text{CH}_2\text{O}-$ ).  $^{13}\text{C-NMR}$  (100.6 MHz,  $\text{CDCl}_3$ )  $\delta$  = 168.95 (2C), 134.69 (2C), 132.89 (2C), 123.94 (2C), 71.41-71.36 (3C), 70.88 (1C), 70.73 (1C), 68.64 (1C), 51.41 (1C), 38.05 ppm (1C). HRMS (ESI):  $m/z$  calcd for  $\text{C}_{16}\text{H}_{20}\text{N}_4\text{O}_5+\text{Na}^+$  [ $M+\text{Na}$ ] $^+$  371.1326; found 371.0903.

### Synthesis of **16b**

By using the general procedure in the main article with **14b** (1.16 g, 2.89 mmol) and potassium phthalimide (803 mg, 4.34 mmol), the pure product was obtained as a yellow oil (1.30 g, 99%):  $^1\text{H-NMR}$  (500 MHz,  $\text{CDCl}_3$ )  $\delta$  = 7.89 (m, 2H, Ar-H), 7.76 (m, 2H, Ar-H), 3.94 (t,  $J$  = 10.0 Hz, 2H,  $-\text{OCH}_2\text{CH}_2\text{NPhth}$ ), 3.78 (t,  $J$  = 5.0 Hz, 2H,  $-\text{OCH}_2\text{CH}_2\text{NPhth}$ ), 3.70 (m, 18H,  $-\text{OCH}_2\text{CH}_2\text{O}-$ ), 3.43 ppm (t,  $J$  = 5.0 Hz, 2H,  $\text{N}_3\text{CH}_2\text{CH}_2\text{O}-$ ).  $^{13}\text{C-NMR}$  (125.8 MHz,  $\text{CDCl}_3$ )  $\delta$  = 168.19 (2C), 133.91 (2C), 132.09 (2C), 123.18 (2C), 70.64-70.48 (7C), 70.04 (1C), 69.98 (1C), 67.85 (1C), 50.64 (1C), 37.22 ppm (1C). HRMS (ESI):  $m/z$  calcd for  $\text{C}_{20}\text{H}_{28}\text{N}_4\text{O}_7+\text{Na}^+$  [ $M+\text{Na}$ ] $^+$  459.1850; found 459.1211.

### Synthesis of **17a**

By using the general procedure in the main article for **Route 1** with **16a** (955 mg, 2.74 mmol) and hydrazine (1.02 g, 31.9 mmol), the pure product was obtained as a yellow oil (550 mg, 92%). By using the general procedure in the main article for **Route 2** with **12a** (500 mg, 2.05 mmol), triphenyl phosphine (483 mg, 1.84 mmol), 5% HCl (10 mL), and  $\text{Et}_2\text{O}$  (10 mL), the pure product was obtained as a pale yellow oil (394 mg, 88%):  $^1\text{H-NMR}$  (400 MHz,  $\text{CDCl}_3$ )  $\delta$  = 3.55 (m, 10H,  $-\text{OCH}_2\text{CH}_2\text{O}-$ ), 3.41 (t,  $J$  = 5.2

Hz, 2H, N<sub>3</sub>CH<sub>2</sub>CH<sub>2</sub>O-), 3.30 (t, *J* = 4.8 Hz, 2H, -OCH<sub>2</sub>CH<sub>2</sub>NH<sub>2</sub>), 2.76 (t, *J* = 5.2 Hz, 2H, N<sub>3</sub>CH<sub>2</sub>CH<sub>2</sub>O-), 1.43 ppm (bs, 2H, -NH<sub>2</sub>). <sup>13</sup>C-NMR (100.6 MHz, CDCl<sub>3</sub>) δ = 74.19 (1C), 71.42-71.09 (3C), 71.01 (1C), 70.68 (1C), 51.39 (1C), 42.51 ppm (1C). HRMS (ESI): *m/z* calcd for C<sub>8</sub>H<sub>18</sub>N<sub>4</sub>O<sub>3</sub>+H<sup>+</sup> [*M*+H]<sup>+</sup> 219.1452; found 219.1202.

### *Synthesis of 17b*

By using the general procedure in the main article for **Route 1** with **16b** (1.44 g, 3.31 mmol) and hydrazine (1.45 g, 45.3 mmol), the pure product was obtained as a yellow oil (940 mg, 93%). By using the general procedure in the main article for **Route 1** with **12b** (500 mg, 1.50 mmol), triphenyl phosphine (355 mg, 1.35 mmol), 5% HCl (10 mL), and Et<sub>2</sub>O (10 mL), the pure product was obtained as a pale yellow oil (398 mg, 86%): <sup>1</sup>H-NMR (500 MHz, CDCl<sub>3</sub>) δ = 3.70 (m, 18H, -OCH<sub>2</sub>CH<sub>2</sub>O-), 3.54 (t, *J* = 5.0 Hz, 2H, N<sub>3</sub>CH<sub>2</sub>CH<sub>2</sub>O-), 3.42 (t, *J* = 5.0 Hz, 2H, -OCH<sub>2</sub>CH<sub>2</sub>NH<sub>2</sub>), 2.89 ppm (t, *J* = 5.0 Hz, 2H, N<sub>3</sub>CH<sub>2</sub>CH<sub>2</sub>O-). <sup>13</sup>C-NMR (125.8 MHz, CDCl<sub>3</sub>) δ = 73.46 (1C), 70.65-70.52 (7C), 70.31 (1C), 69.98 (1C), 50.63 (1C), 41.78 ppm (1C). HRMS (ESI): *m/z* calcd for C<sub>12</sub>H<sub>26</sub>N<sub>4</sub>O<sub>5</sub>+H<sup>+</sup> [*M*+H]<sup>+</sup> 307.1976; found 307.1723.

## S2 – COPIES OF $^1\text{H}$ NMR, $^{13}\text{C}$ NMR & HRMS

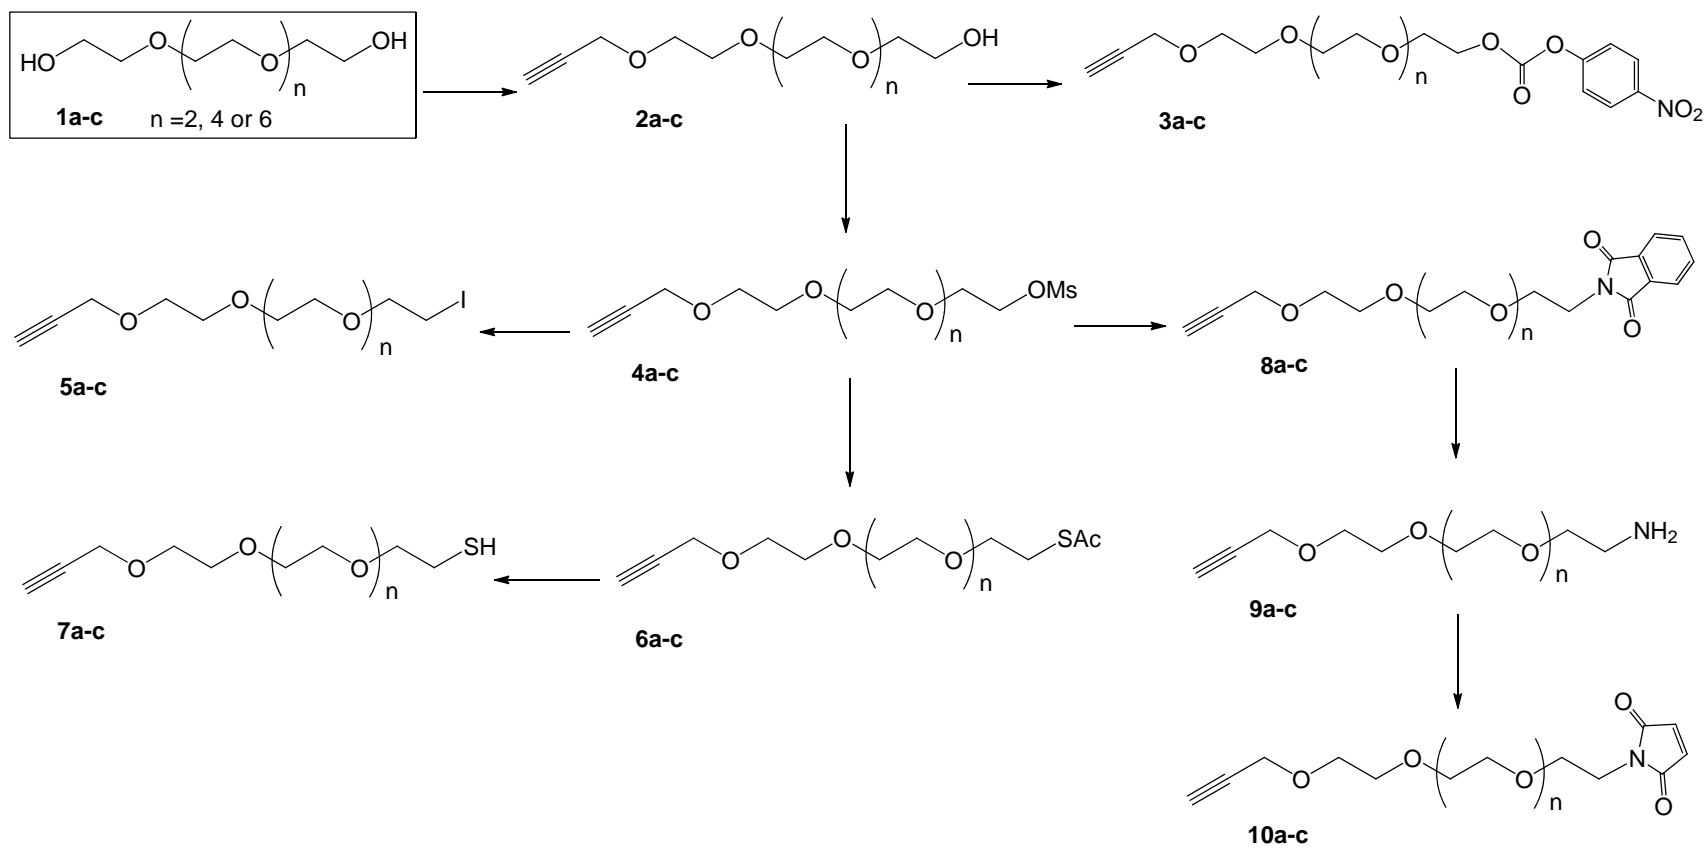



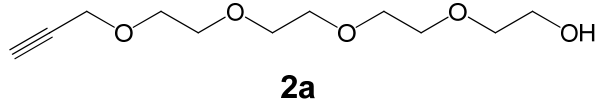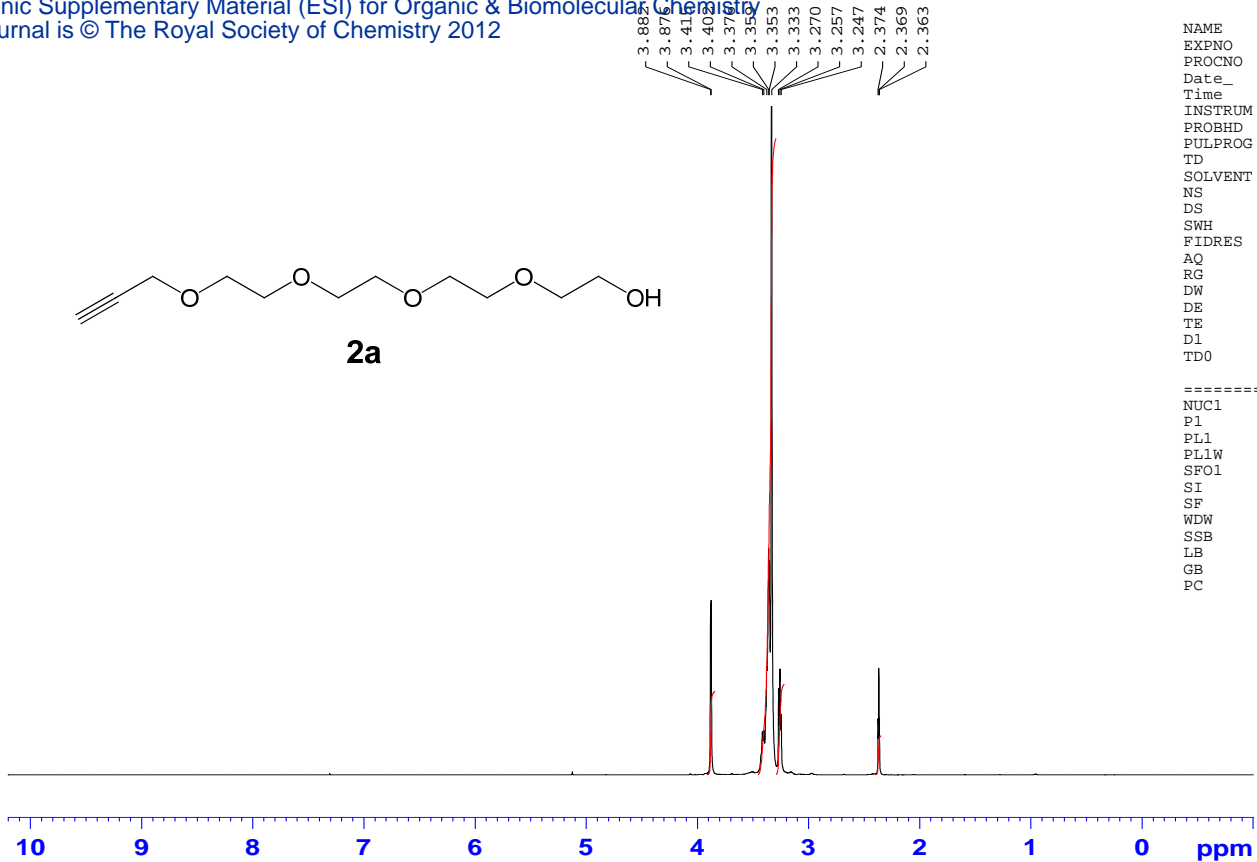

```

NAME      ZH3-121-C_Alk-P4-OH
EXPNO    1
PROCNO   1
Date_    20111006
Time     23.15
INSTRUM  spect
PROBHD   5 mm PABBO BB-
PULPROG  zg30
TD       65536
SOLVENT  CDCl3
NS       16
DS       2
SWH      8802.817 Hz
FIDRES   0.134320 Hz
AQ       3.7224948 sec
RG       7.12
DW       56.800 usec
DE       6.50 usec
TE       292.5 K
D1       1.00000000 sec
TD0      1

===== CHANNEL f1 =====
NUC1     1H
P1       14.85 usec
PL1     -0.60 dB
PL1W    13.81451130 W
SFO1    400.1320007 MHz
SI       32768
SF       400.1300000 MHz
WDW      EM
SSB      0
LB       0.30 Hz
GB       0
PC       1.00
    
```

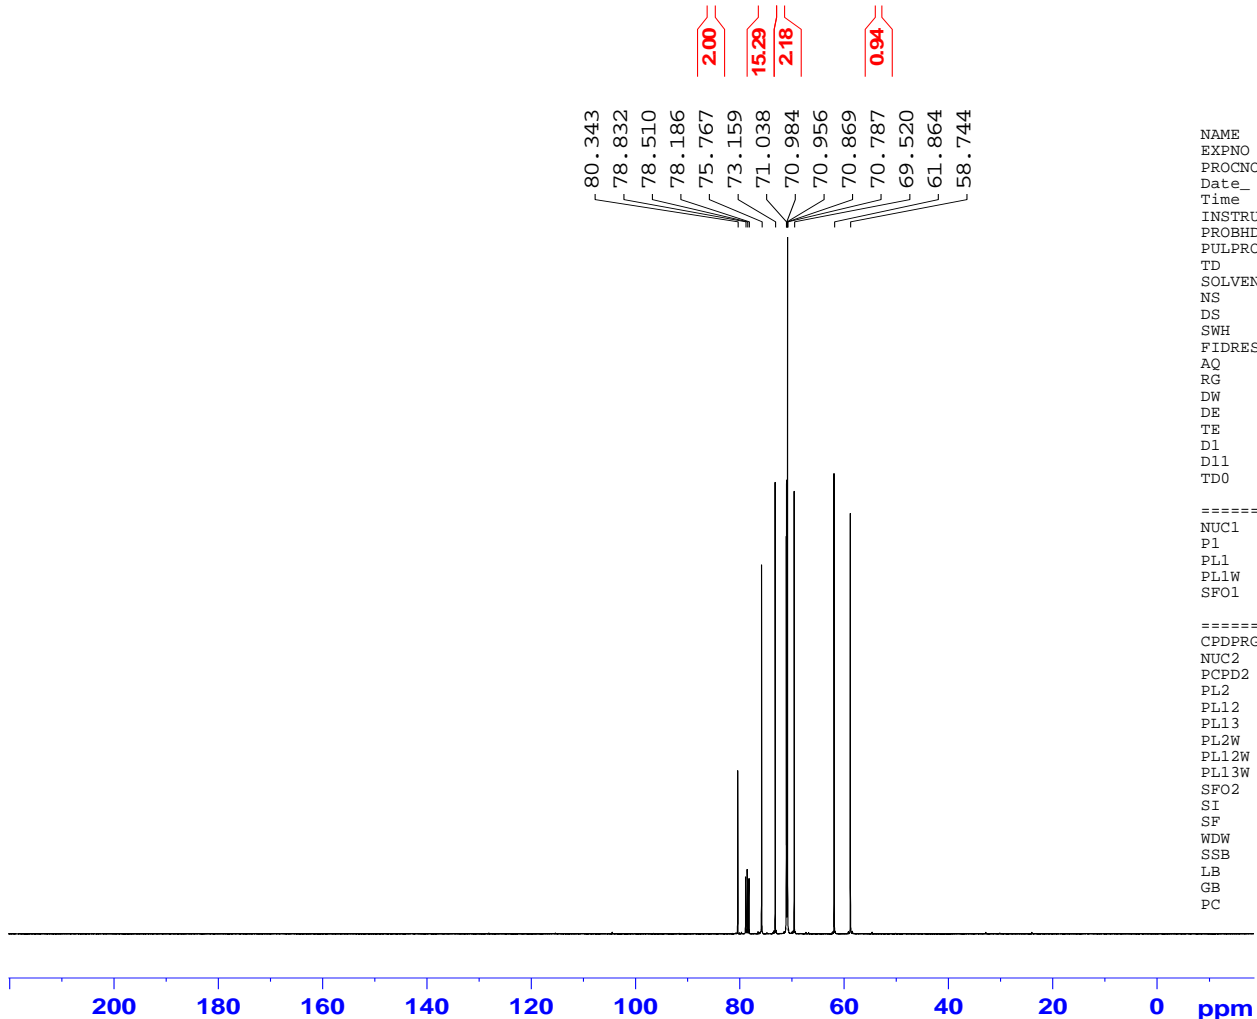

```

NAME      ZH3-121-C_Alk-P4-OH
EXPNO    2
PROCNO   1
Date_    20111007
Time     0.16
INSTRUM  spect
PROBHD   5 mm PABBO BB-
PULPROG  zgpg30
TD       65536
SOLVENT  CDCl3
NS       1024
DS       4
SWH      24038.461 Hz
FIDRES   0.366798 Hz
AQ       1.3631988 sec
RG       80.6
DW       20.800 usec
DE       6.50 usec
TE       294.4 K
D1       2.00000000 sec
D11     0.03000000 sec
TD0      1

===== CHANNEL f1 =====
NUC1     13C
P1       9.99 usec
PL1     -3.00 dB
PL1W    73.67452240 W
SFO1    100.6228298 MHz

===== CHANNEL f2 =====
CPDPRG2  waltz16
NUC2     1H
PCPD2    80.00 usec
PL2     -0.65 dB
PL12    13.40 dB
PL13    13.40 dB
PL2W    13.97447491 W
PL12W   0.54996562 W
PL13W   0.54996562 W
SFO2    400.1316005 MHz
SI       32768
SF       100.6126885 MHz
WDW      EM
SSB      0
LB       1.00 Hz
GB       0
PC       1.40
    
```

## Applied Biosystems Mariner System 5268

Mariner Spec /1:105 (T /0.00:1.86) ASC[BP = 255.1, 2696]

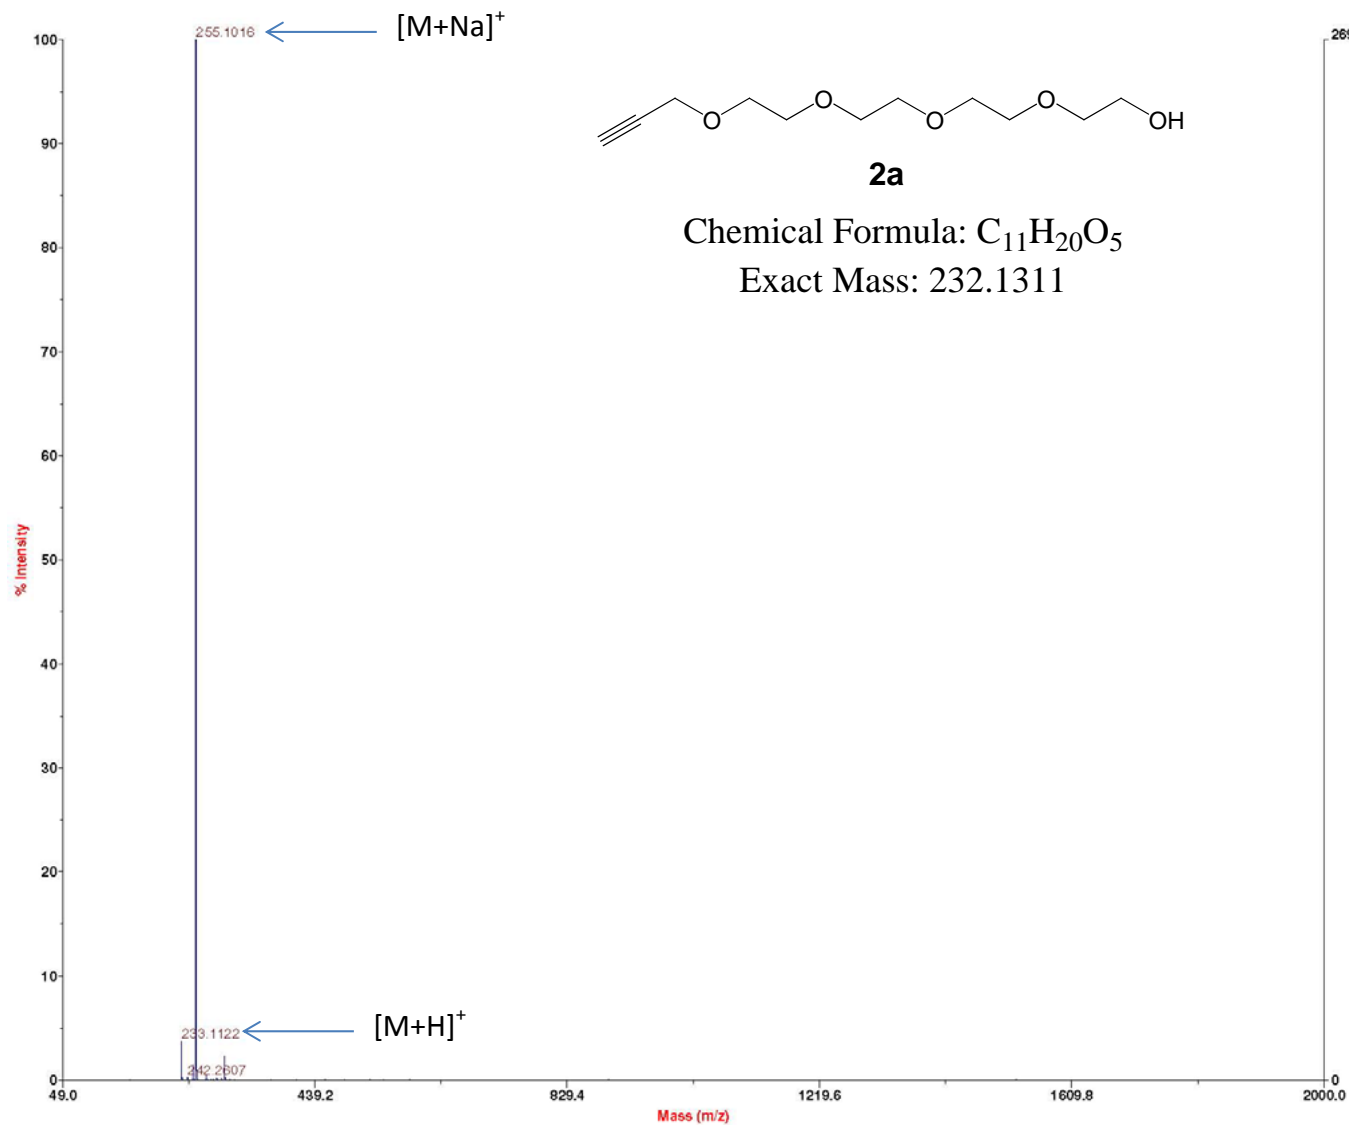

|                                       |                |
|---------------------------------------|----------------|
| --> Mariner System State <--          |                |
| Instrument State                      | ON             |
| Ion Polarity                          | POS            |
| Auxiliary Gas                         | ON             |
| Curtain Gas                           | ON             |
| Nebulizer Gas                         | ON             |
| Calibration Constant A                | 5.0146867E-007 |
| Calibration Constant B                | 77.798312      |
| TDC Deadtime                          | 10             |
| --> Source Settings <--               |                |
| Spray Tip Potential                   | 4509.96        |
| SCIEX Heater                          | 300.05         |
| --> API Interface Settings <--        |                |
| Nozzle Potential                      | 149.90         |
| Skimmer 1 Potential                   | 10.01          |
| Quadrupole DC Potential               | 5.49           |
| Deflection Voltage                    | 0.10           |
| Einzel Lens Potential                 | -24.00         |
| Quadrupole RF Voltage                 | 999.76         |
| Quadrupole Temperature                | 140.01         |
| Nozzle Temperature                    | 140.01         |
| --> Analyzer Settings <--             |                |
| Push Pulse Potential                  | 490.00         |
| Pull Pulse Potential                  | 213.11         |
| Pull Bias Potential                   | 10.00          |
| Acceleration Potential                | 3999.94        |
| Reflector Potential                   | 1549.99        |
| Detector Voltage                      | 1700.24        |
| --> Spectrum Acquisition Settings <-- |                |
| Seconds Per Spectrum                  | 1.00           |
| Ion Count Threshold                   | 0.00           |
| First Mass                            | 50.00          |
| Last Mass                             | 2000.00        |
| Accumulate Spectra                    | OFF            |
| Standby at End of Acquisition         | OFF            |
| --> Centroid Spectra Settings <--     |                |
| Centroid Spectra                      | OFF            |
| --> System Settings <--               |                |
| Gas Control Mode                      | Manual         |
| Syringe Pump Mode                     | Manual         |
| Syringe Pump Rate                     | 50.00          |
| Syringe Diameter                      | 3.26           |
| Min Analyzer Mass                     | 50.00          |
| Max Analyzer Mass                     | 4000.00        |

Acquired: Oct 07 09:14:00 2011  
Mariner Mass Spectrum  
C:\Mariner\Data\2011\Oct07 Fri\ZH3-121-A001.dat

Printed: 09:16, October 07, 2011

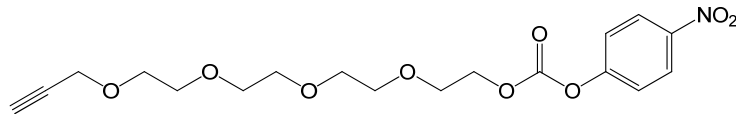

3a

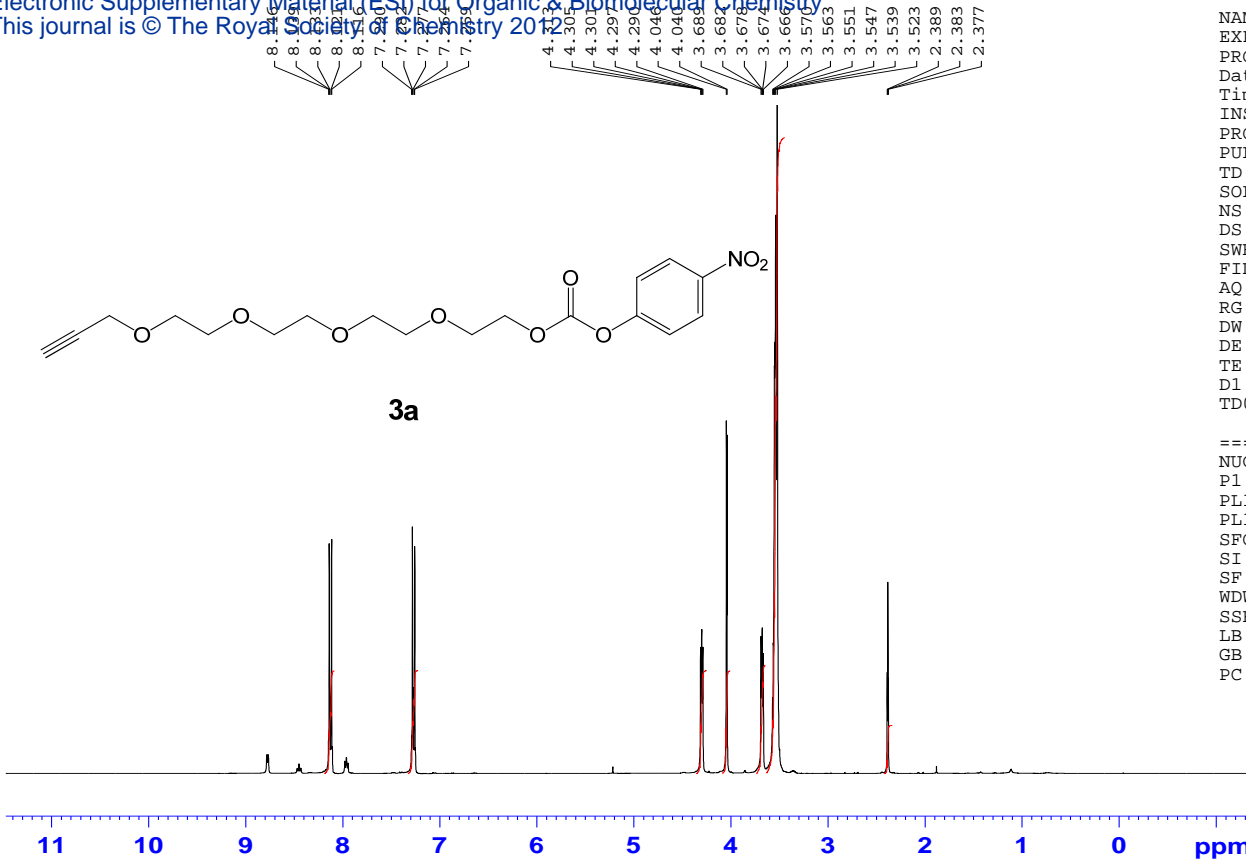

```

NAME      ZH3-129-A_Alk-P4-PNPC
EXPNO     1
PROCNO    1
Date_     20111018
Time      21.04
INSTRUM   spect
PROBHD    5 mm PABBO BB-
PULPROG   zg30
TD         65536
SOLVENT   CDC13
NS         16
DS         2
SWH       8802.817 Hz
FIDRES    0.134320 Hz
AQ        3.7224948 sec
RG         14.2
DW         56.800 usec
DE         6.50 usec
TE         292.6 K
D1         1.0000000 sec
TD0        1
    
```

```

===== CHANNEL f1 =====
NUC1      1H
P1        14.85 usec
PL1       -0.60 dB
PL1W      13.81451130 W
SFO1      400.1320007 MHz
SI        32768
SF        400.1300000 MHz
WDW       EM
SSB       0
LB        0.30 Hz
GB        0
PC        1.00
    
```

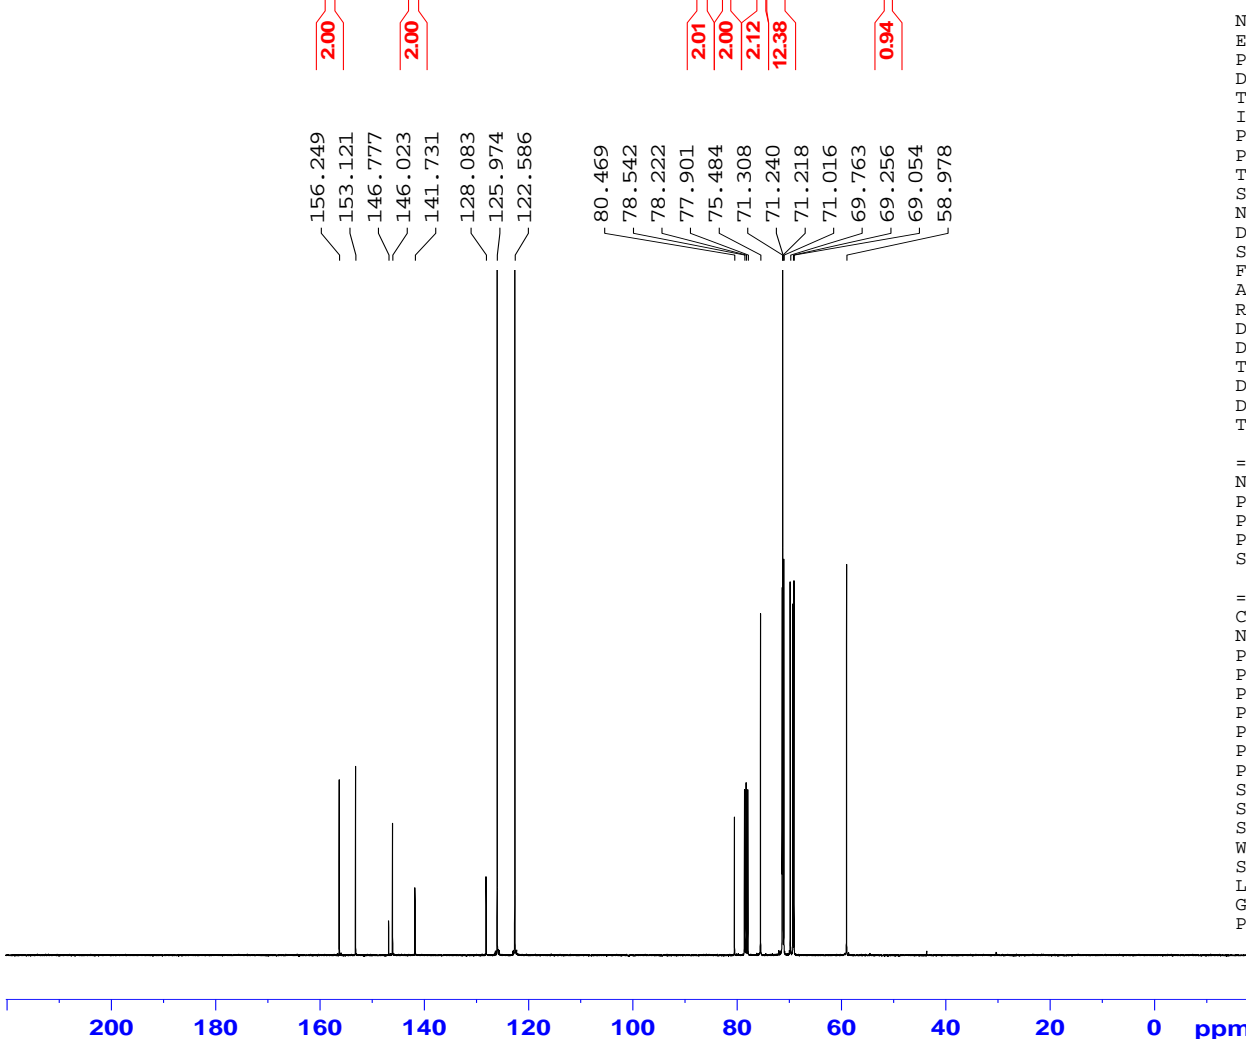

```

NAME      ZH3-129-A_Alk-P4-PNPC
EXPNO     2
PROCNO    1
Date_     20111018
Time      22.06
INSTRUM   spect
PROBHD    5 mm PABBO BB-
PULPROG   zgpg30
TD         65536
SOLVENT   CDC13
NS         1024
DS         4
SWH       24038.461 Hz
FIDRES    0.366798 Hz
AQ        1.3631988 sec
RG         80.6
DW         20.800 usec
DE         6.50 usec
TE         294.6 K
D1         2.0000000 sec
D11        0.03000000 sec
TD0        1
    
```

```

===== CHANNEL f1 =====
NUC1      13C
P1        9.99 usec
PL1       -3.00 dB
PL1W      73.67452240 W
SFO1      100.6228298 MHz
    
```

```

===== CHANNEL f2 =====
CPDPRG2   waltz16
NUC2      1H
PCPD2     80.00 usec
PL2       -0.65 dB
PL12      13.40 dB
PL13      13.40 dB
PL2W      13.97447491 W
PL12W     0.54996562 W
PL13W     0.54996562 W
SFO2      400.1316005 MHz
SI        32768
SF        100.6126885 MHz
WDW       EM
SSB       0
LB        1.00 Hz
GB        0
PC        1.40
    
```

## Applied Biosystems Mariner System 5268

Mariner Spec /1:28 (T/0.00:0.48) ASC[BP = 420.0, 170]

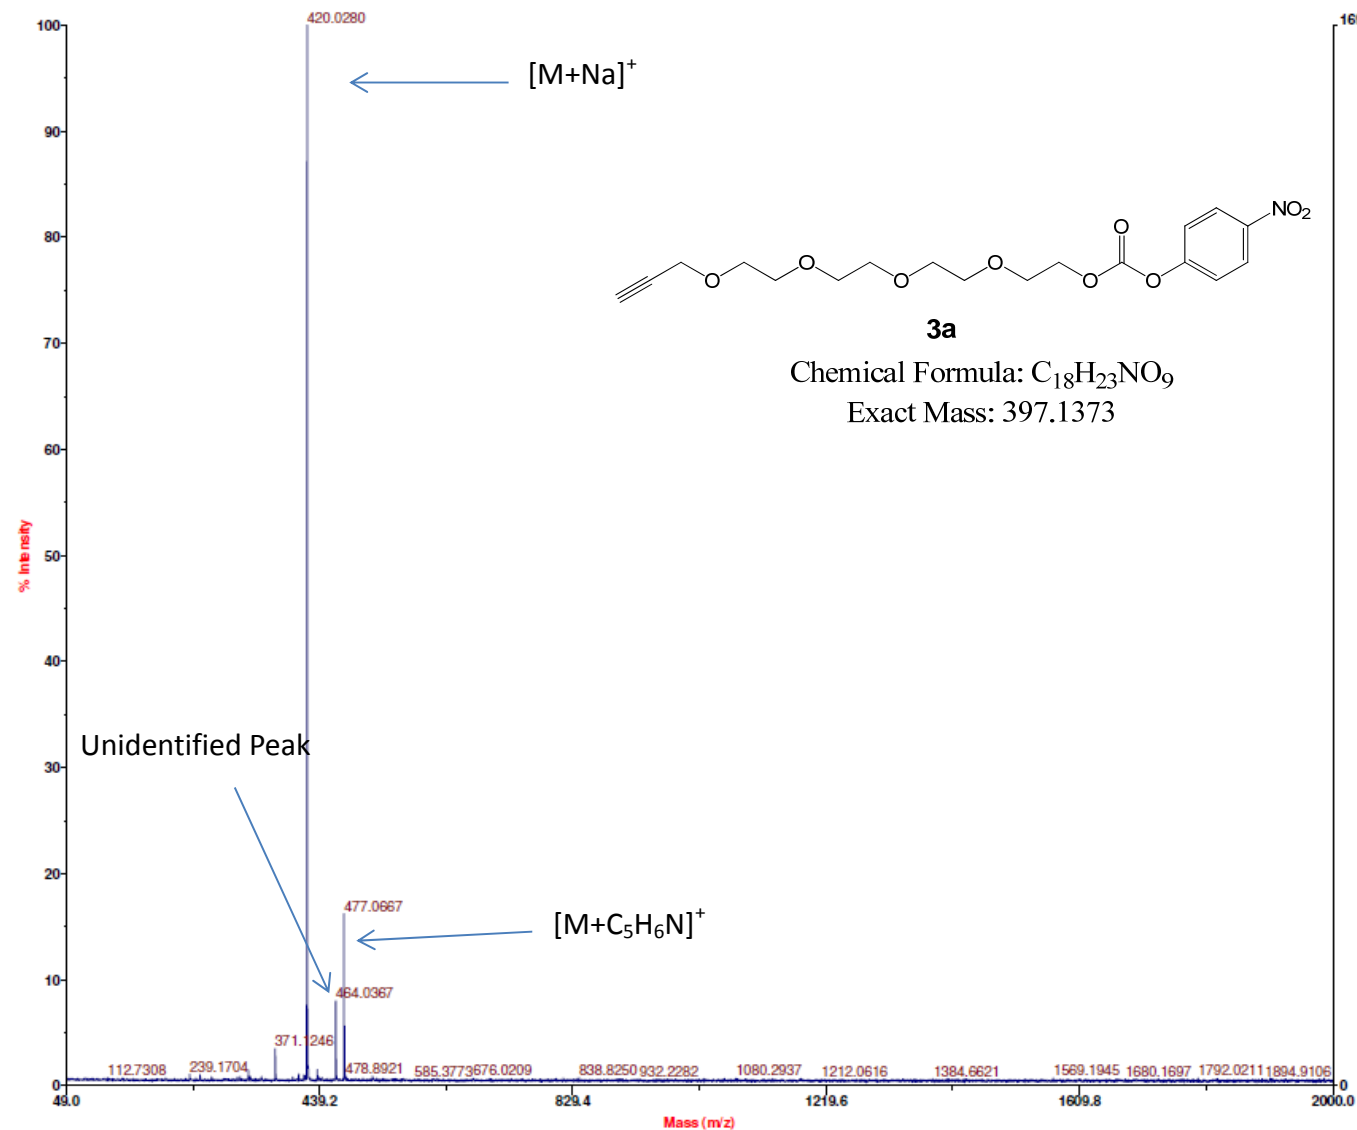

--> Mariner System State <--

|                                       |                |
|---------------------------------------|----------------|
| Instrument State                      | ON             |
| Ion Polarity                          | POS            |
| Auxiliary Gas                         | ON             |
| Curtain Gas                           | ON             |
| Nebulizer Gas                         | ON             |
| Calibration Constant A                | 5.0146867E-007 |
| Calibration Constant B                | 77.798312      |
| TDC Deadtime                          | 10             |
| --> Source Settings <--               |                |
| Spray Tip Potential                   | 4509.96        |
| SCIEX Heater                          | 300.05         |
| --> API Interface Settings <--        |                |
| Nozzle Potential                      | 40.04          |
| Skimmer 1 Potential                   | 10.01          |
| Quadrupole DC Potential               | 5.49           |
| Deflection Voltage                    | 0.10           |
| Einzel Lens Potential                 | -24.00         |
| Quadrupole RF Voltage                 | 999.76         |
| Quadrupole Temperature                | 140.01         |
| Nozzle Temperature                    | 140.01         |
| --> Analyzer Settings <--             |                |
| Push Pulse Potential                  | 490.00         |
| Pull Pulse Potential                  | 213.11         |
| Pull Bias Potential                   | 10.00          |
| Acceleration Potential                | 3999.94        |
| Reflector Potential                   | 1549.99        |
| Detector Voltage                      | 1700.24        |
| --> Spectrum Acquisition Settings <-- |                |
| Seconds Per Spectrum                  | 1.00           |
| Ion Count Threshold                   | 0.00           |
| First Mass                            | 50.00          |
| Last Mass                             | 2000.00        |
| Accumulate Spectra                    | OFF            |
| Standby at End of Acquisition         | OFF            |
| --> Centroid Spectra Settings <--     |                |
| Centroid Spectra                      | OFF            |
| --> System Settings <--               |                |
| Gas Control Mode                      | Manual         |
| Syringe Pump Mode                     | Manual         |
| Syringe Pump Rate                     | 50.00          |
| Syringe Diameter                      | 3.26           |
| Min Analyzer Mass                     | 50.00          |
| Max Analyzer Mass                     | 4000.00        |

Acquired: Oct 18 14:38:00 2011  
Mariner Mass Spectrum  
C:\Mariner\Data\2011\Oct\18 Tues\ZH3-129001.dat

Printed: 14:39, October 18, 2011

```

NAME      ZH3-128_Alk-P4-OMs
EXPNO    1
PROCNO   1
Date_    20111017
Time     21.04
INSTRUM  spect
PROBHD   5 mm PABBO BB-
PULPROG  zg30
TD       65536
SOLVENT  CDCl3
NS       16
DS       2
SWH      8802.817 Hz
FIDRES   0.134320 Hz
AQ       3.7224948 sec
RG       12.7
DW       56.800 usec
DE       6.50 usec
TE       292.6 K
D1       1.0000000 sec
D10      1
    
```

```

===== CHANNEL f1 =====
NUC1     1H
P1       14.85 usec
PL1      -0.60 dB
PL1W    13.81451130 W
SFO1    400.1320007 MHz
SI       32768
SF       400.1300000 MHz
WDW      EM
SSB      0
LB       0.30 Hz
GB       0
PC       1.00
    
```

```

NAME      ZH3-128_Alk-P4-OMs
EXPNO    2
PROCNO   1
Date_    20111017
Time     22.05
INSTRUM  spect
PROBHD   5 mm PABBO BB-
PULPROG  zgpg30
TD       65536
SOLVENT  CDCl3
NS       1024
DS       4
SWH      24038.461 Hz
FIDRES   0.366798 Hz
AQ       1.3631988 sec
RG       1030
DW       20.800 usec
DE       6.50 usec
TE       294.5 K
D1       2.0000000 sec
D11      0.03000000 sec
D10      1
    
```

```

===== CHANNEL f1 =====
NUC1     13C
P1       9.99 usec
PL1      -3.00 dB
PL1W    73.67452240 W
SFO1    100.6228298 MHz
    
```

```

===== CHANNEL f2 =====
CPDPRG2  waltz16
NUC2     1H
PCPD2    80.00 usec
PL2      -0.65 dB
PL12     13.40 dB
PL13     13.40 dB
PL2W    13.97447491 W
PL12W   0.54996562 W
PL13W   0.54996562 W
SFO2    400.1316005 MHz
SI       32768
SF       100.6126885 MHz
WDW      EM
SSB      0
LB       1.00 Hz
GB       0
PC       1.40
    
```

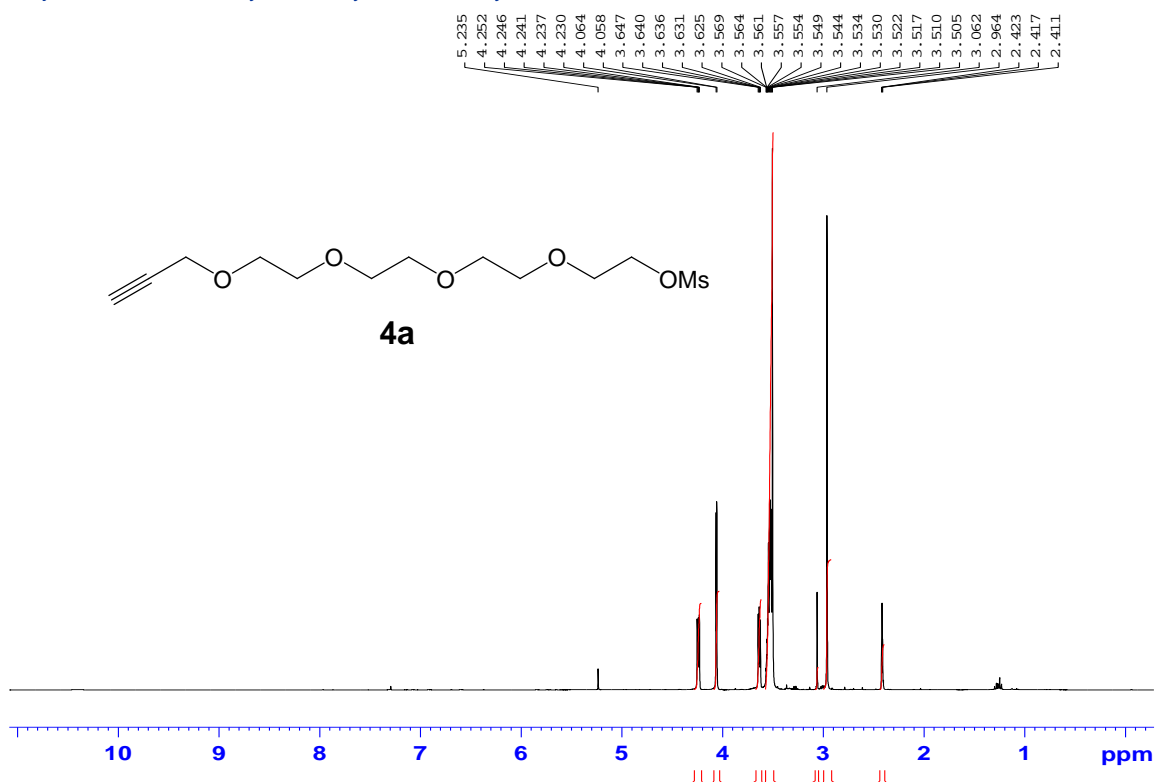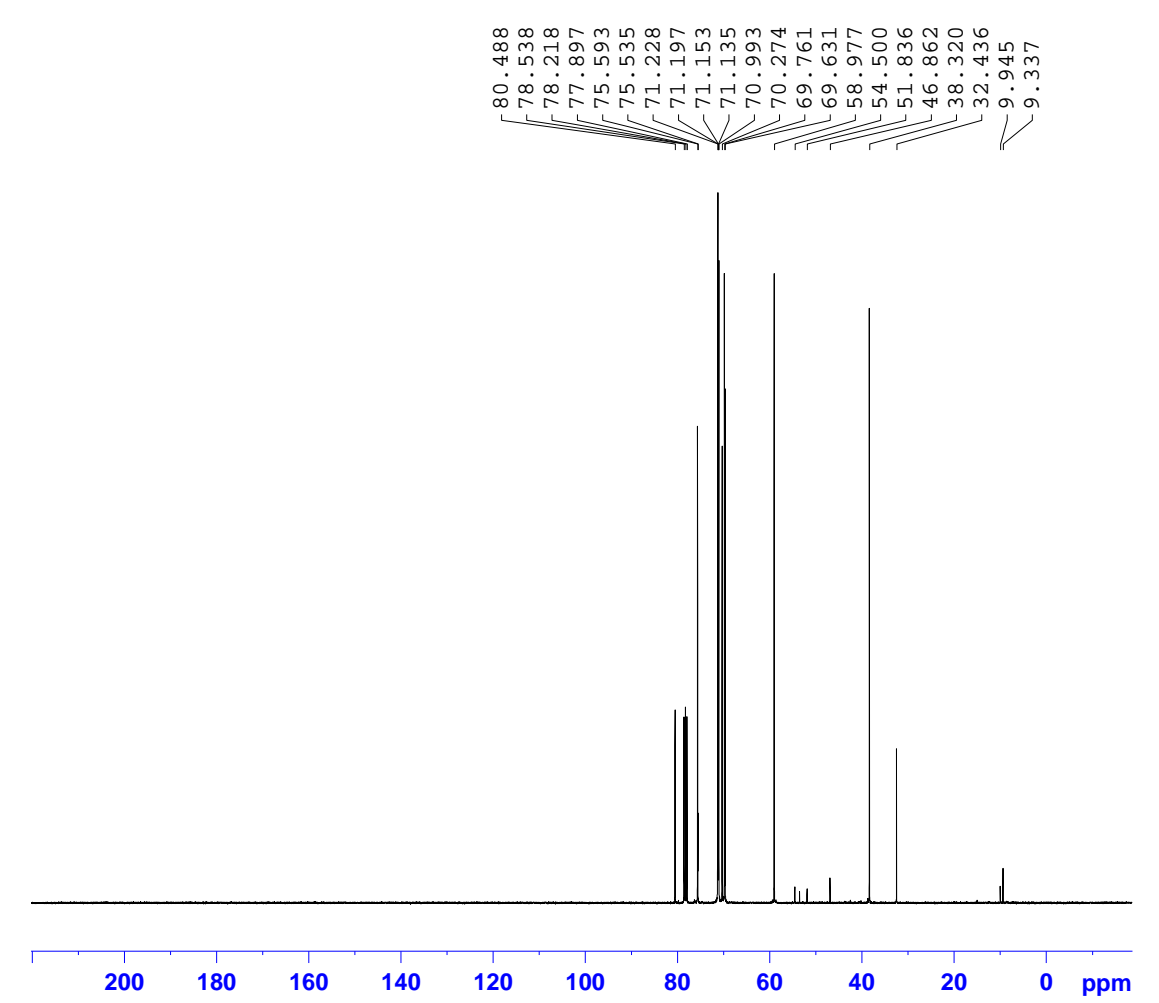

Mariner Spec /1:25 (T/0.00:0.43) ASC[BP = 333.1, 2281]

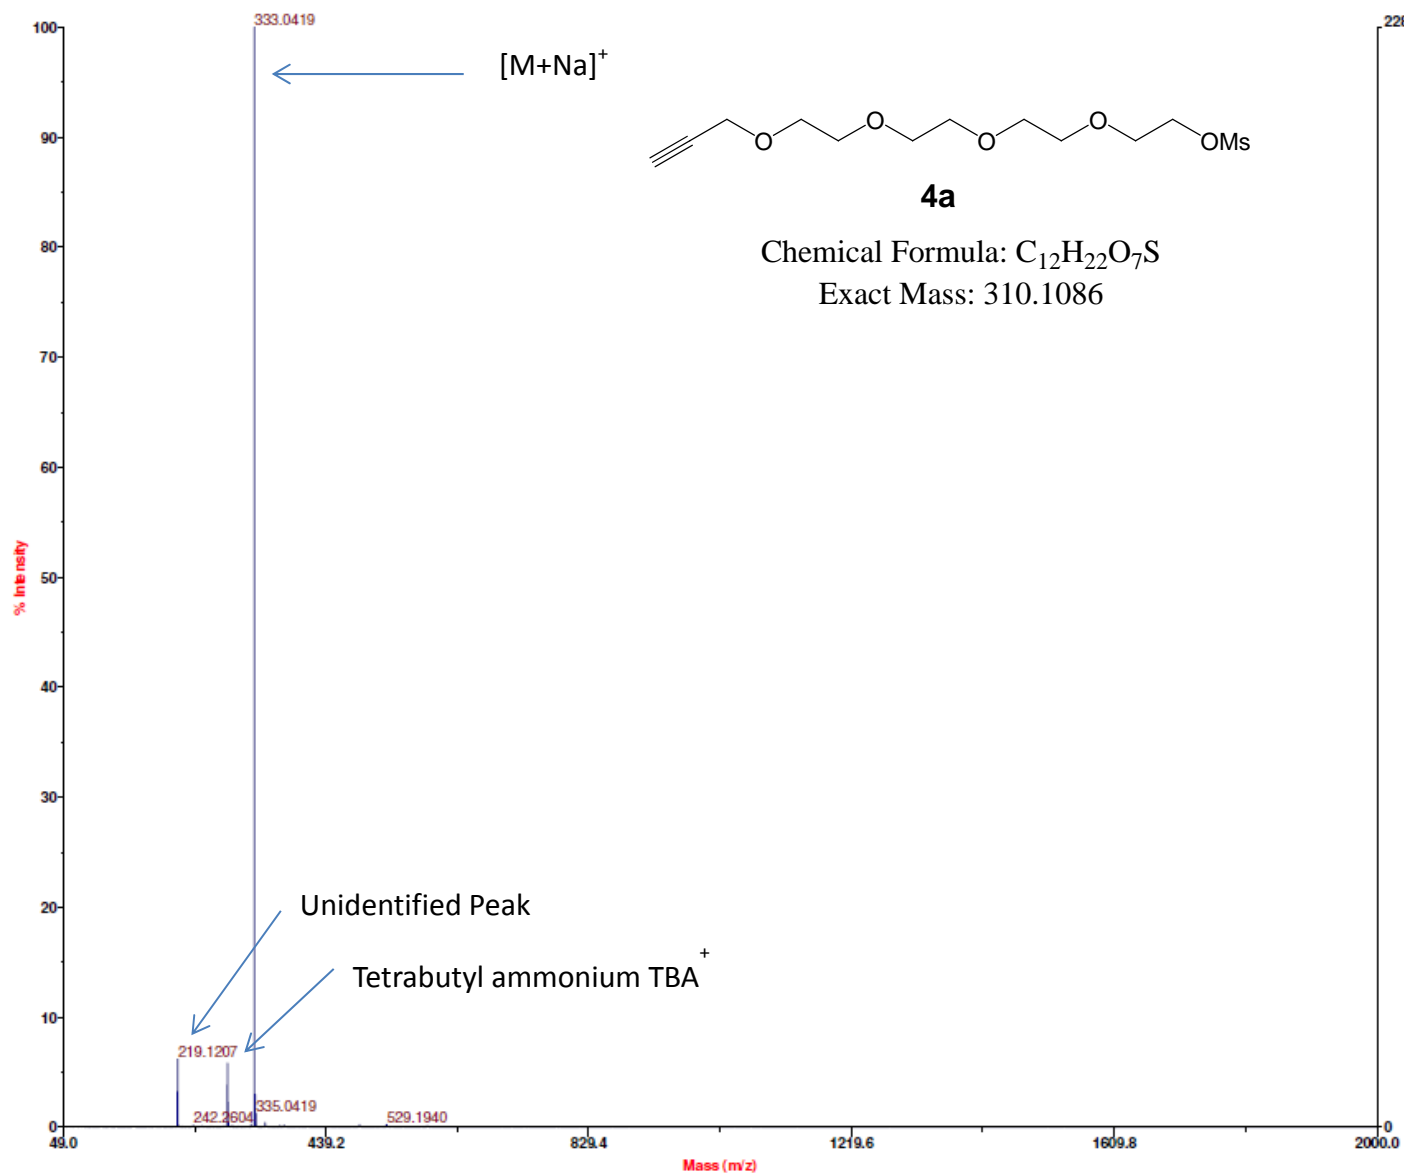

|                                       |                |
|---------------------------------------|----------------|
| --> Mariner System State <--          |                |
| Instrument State                      | ON             |
| Ion Polarity                          | POS            |
| Auxiliary Gas                         | ON             |
| Curtain Gas                           | ON             |
| Nebulizer Gas                         | ON             |
| Calibration Constant A                | 5.0146867E-007 |
| Calibration Constant B                | 77.798312      |
| TDC Deadtime                          | 10             |
| --> Source Settings <--               |                |
| Spray Tip Potential                   | 4509.96        |
| SCIEX Heater                          | 300.05         |
| --> API Interface Settings <--        |                |
| Nozzle Potential                      | 40.04          |
| Skimmer 1 Potential                   | 10.01          |
| Quadrupole DC Potential               | 5.49           |
| Deflection Voltage                    | 0.10           |
| Einzel Lens Potential                 | -24.00         |
| Quadrupole RF Voltage                 | 999.76         |
| Quadrupole Temperature                | 140.01         |
| Nozzle Temperature                    | 140.01         |
| --> Analyzer Settings <--             |                |
| Push Pulse Potential                  | 490.00         |
| Pull Pulse Potential                  | 213.11         |
| Pull Bias Potential                   | 10.00          |
| Acceleration Potential                | 3999.94        |
| Reflector Potential                   | 1549.99        |
| Detector Voltage                      | 1700.24        |
| --> Spectrum Acquisition Settings <-- |                |
| Seconds Per Spectrum                  | 1.00           |
| Ion Count Threshold                   | 0.00           |
| First Mass                            | 50.00          |
| Last Mass                             | 2000.00        |
| Accumulate Spectra                    | OFF            |
| Standby at End of Acquisition         | OFF            |
| --> Centroid Spectra Settings <--     |                |
| Centroid Spectra                      | OFF            |
| --> System Settings <--               |                |
| Gas Control Mode                      | Manual         |
| Syringe Pump Mode                     | Manual         |
| Syringe Pump Rate                     | 50.00          |
| Syringe Diameter                      | 3.26           |
| Min Analyzer Mass                     | 50.00          |
| Max Analyzer Mass                     | 4000.00        |

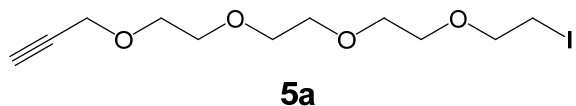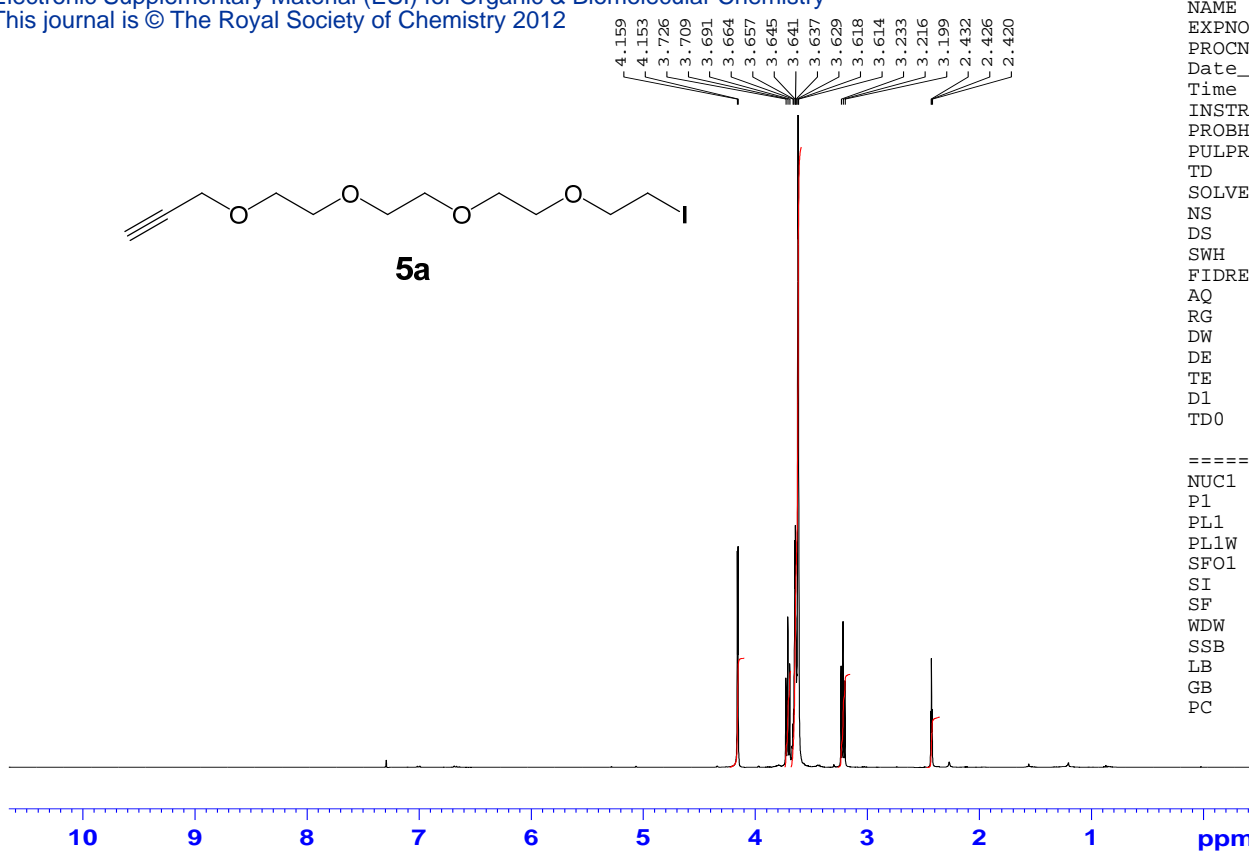

```

NAME      ZH3-131_Alk-P4-I
EXPNO    1
PROCNO    1
Date_     20111018
Time      23.21
INSTRUM   spect
PROBHD    5 mm PABBO BB-
PULPROG   zg30
TD         65536
SOLVENT   CDCl3
NS         16
DS         2
SWH        8802.817 Hz
FIDRES     0.134320 Hz
AQ         3.7224948 sec
RG         22.6
DW         56.800 usec
DE         6.50 usec
TE         292.5 K
D1         1.00000000 sec
TD0        1
    
```

```

===== CHANNEL f1 =====
NUC1      1H
P1         14.85 usec
PL1        -0.60 dB
PL1W      13.81451130 W
SFO1      400.1320007 MHz
SI         32768
SF         400.1300000 MHz
WDW        EM
SSB        0
LB         0.30 Hz
GB         0
PC         1.00
    
```

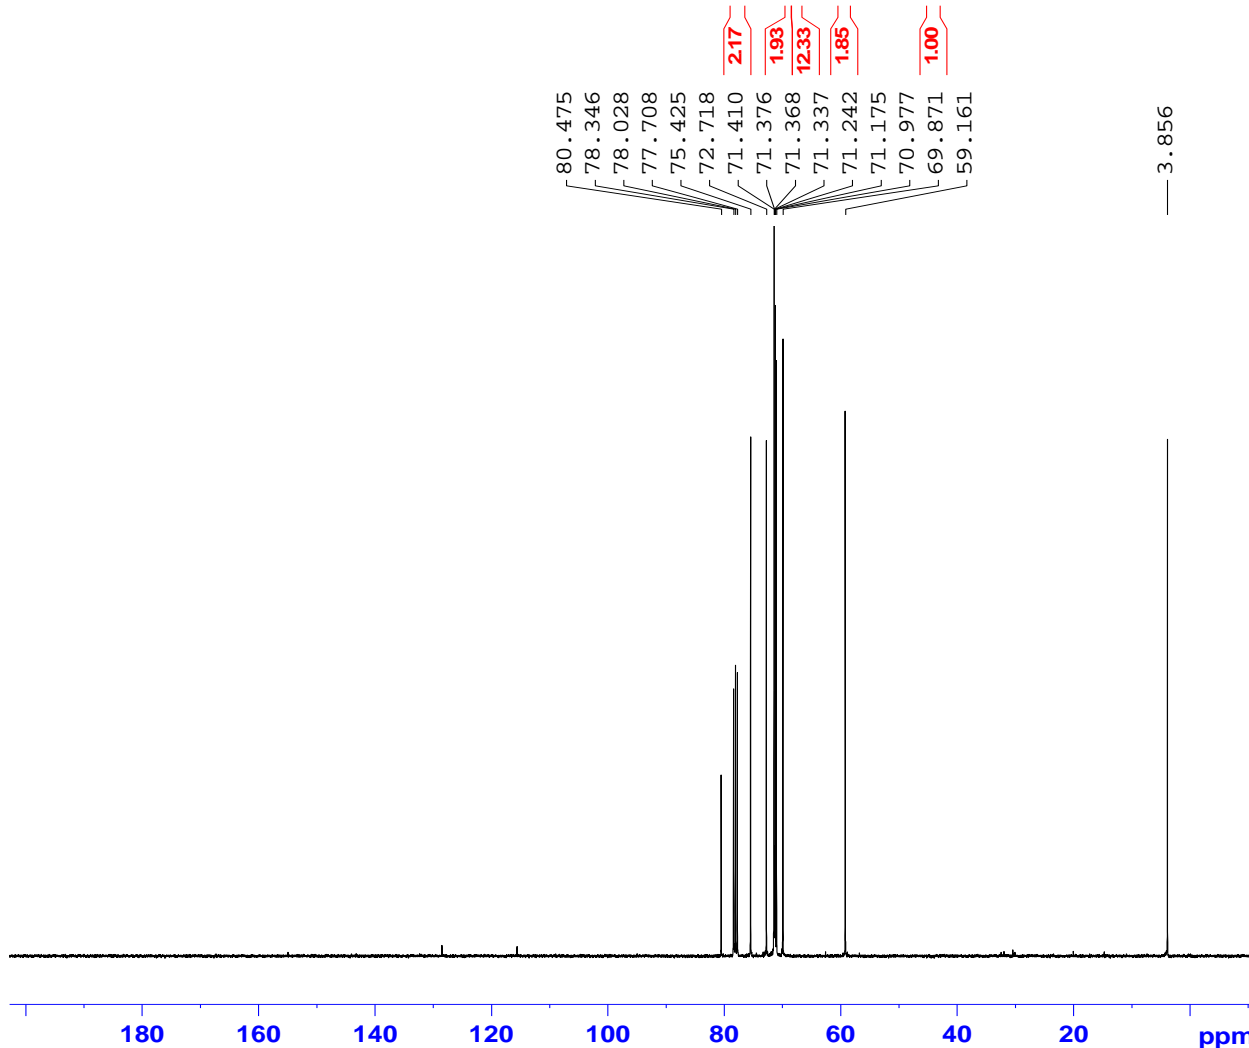

```

NAME      ZH3-131_Alk-P4-I
EXPNO    2
PROCNO    1
Date_     20111019
Time      0.21
INSTRUM   spect
PROBHD    5 mm PABBO BB-
PULPROG   zgpg30
TD         65536
SOLVENT   CDCl3
NS         1024
DS         4
SWH        24038.461 Hz
FIDRES     0.366798 Hz
AQ         1.3631988 sec
RG         724
DW         20.800 usec
DE         6.50 usec
TE         294.5 K
D1         2.00000000 sec
D11        0.03000000 sec
TD0        1
    
```

```

===== CHANNEL f1 =====
NUC1      13C
P1         9.99 usec
PL1        -3.00 dB
PL1W      73.67452240 W
SFO1      100.6228298 MHz
    
```

```

===== CHANNEL f2 =====
CPDPRG2   waltz16
NUC2      1H
PCPD2     80.00 usec
PL2        -0.65 dB
PL12      13.40 dB
PL13      13.40 dB
PL2W      13.97447491 W
PL12W     0.54996562 W
PL13W     0.54996562 W
SFO2      400.1316005 MHz
SI         32768
SF         100.6126885 MHz
WDW        EM
SSB        0
LB         1.00 Hz
GB         0
PC         1.40
    
```

Mariner Spec /1:39 (T /0.00:0.68) ASC[BP = 343.0, 439]

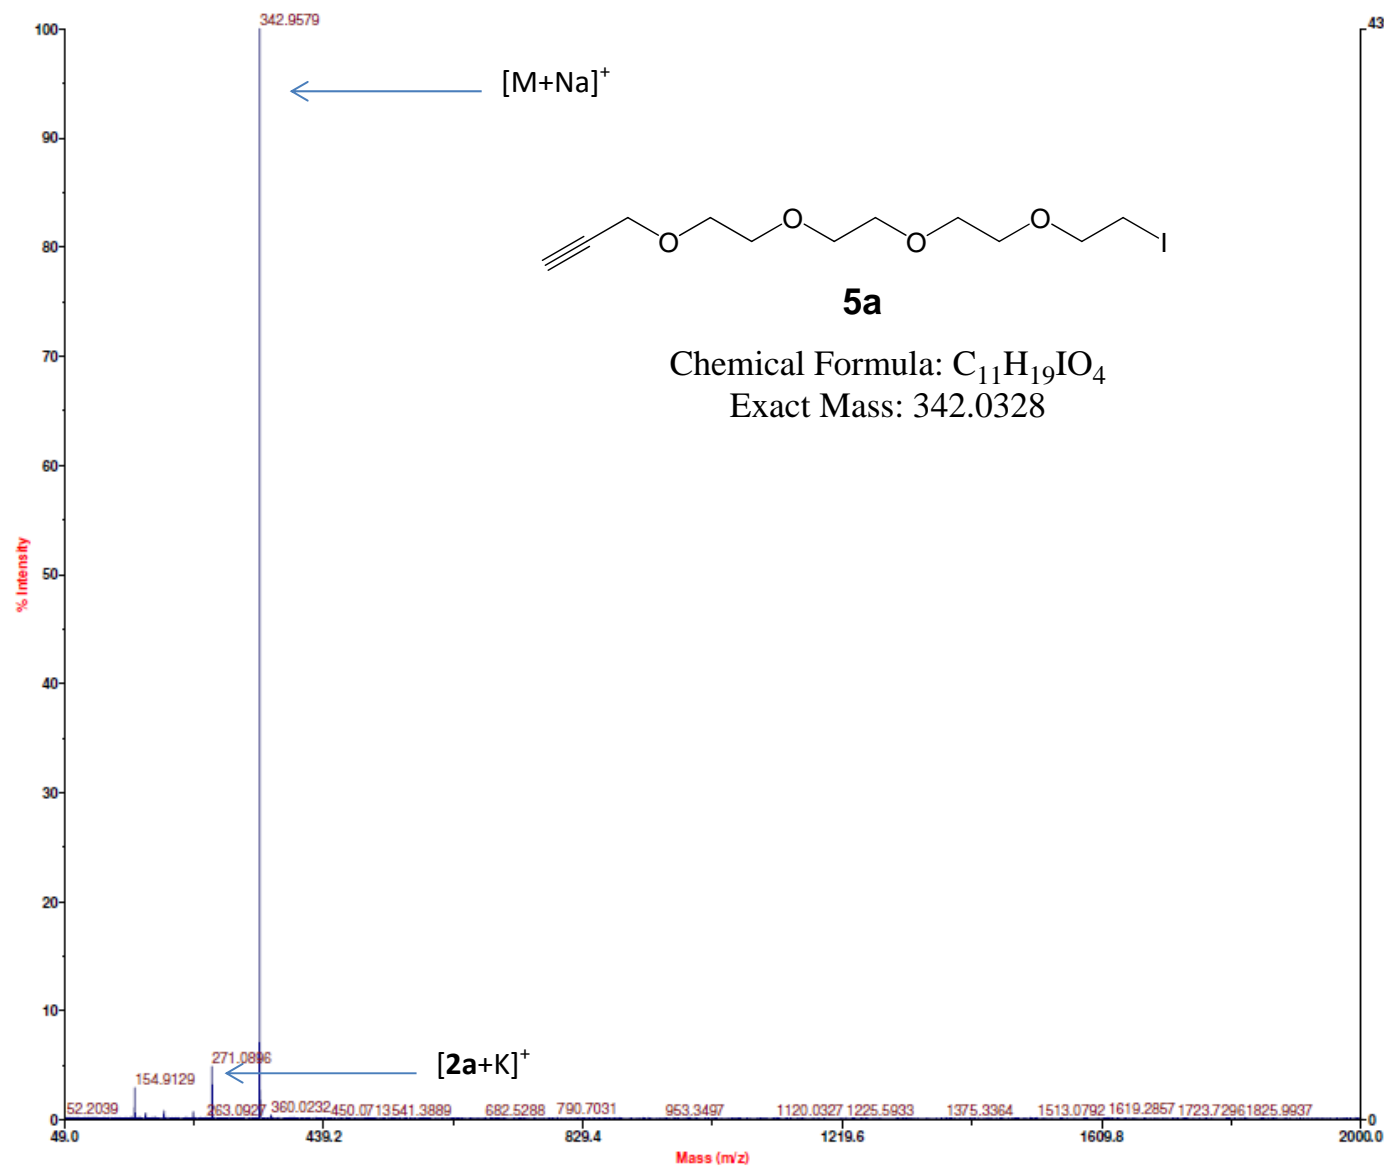

| Parameter                             | Value          |
|---------------------------------------|----------------|
| --> Mariner System State <--          |                |
| Instrument State                      | ON             |
| Ion Polarity                          | POS            |
| Auxillary Gas                         | ON             |
| Curtain Gas                           | ON             |
| Nebulizer Gas                         | ON             |
| Calibration Constant A                | 5.0149194E-007 |
| Calibration Constant B                | 78.267402      |
| TDC Deadtime                          | 10             |
| --> Source Settings <--               |                |
| Spray Tip Potential                   | 4509.96        |
| SCIEX Heater                          | 300.05         |
| --> API Interface Settings <--        |                |
| Nozzle Potential                      | 40.04          |
| Skimmer 1 Potential                   | 10.01          |
| Quadrupole DC Potential               | 5.49           |
| Deflection Voltage                    | 0.10           |
| Einzel Lens Potential                 | -24.00         |
| Quadrupole RF Voltage                 | 999.76         |
| Quadrupole Temperature                | 140.01         |
| Nozzle Temperature                    | 140.01         |
| --> Analyzer Settings <--             |                |
| Push Pulse Potential                  | 490.00         |
| Pull Pulse Potential                  | 213.11         |
| Pull Bias Potential                   | 10.00          |
| Acceleration Potential                | 3999.94        |
| Reflector Potential                   | 1549.99        |
| Detector Voltage                      | 1700.24        |
| --> Spectrum Acquisition Settings <-- |                |
| Seconds Per Spectrum                  | 1.00           |
| Ion Count Threshold                   | 0.00           |
| First Mass                            | 50.00          |
| Last Mass                             | 2000.00        |
| Accumulate Spectra                    | OFF            |
| Standby at End of Acquisition         | OFF            |
| --> Centroid Spectra Settings <--     |                |
| Centroid Spectra                      | OFF            |
| --> System Settings <--               |                |
| Gas Control Mode                      | Manual         |
| Syringe Pump Mode                     | Manual         |
| Syringe Pump Rate                     | 50.00          |
| Syringe Diameter                      | 3.26           |
| Min Analyzer Mass                     | 50.00          |
| Max Analyzer Mass                     | 4000.00        |



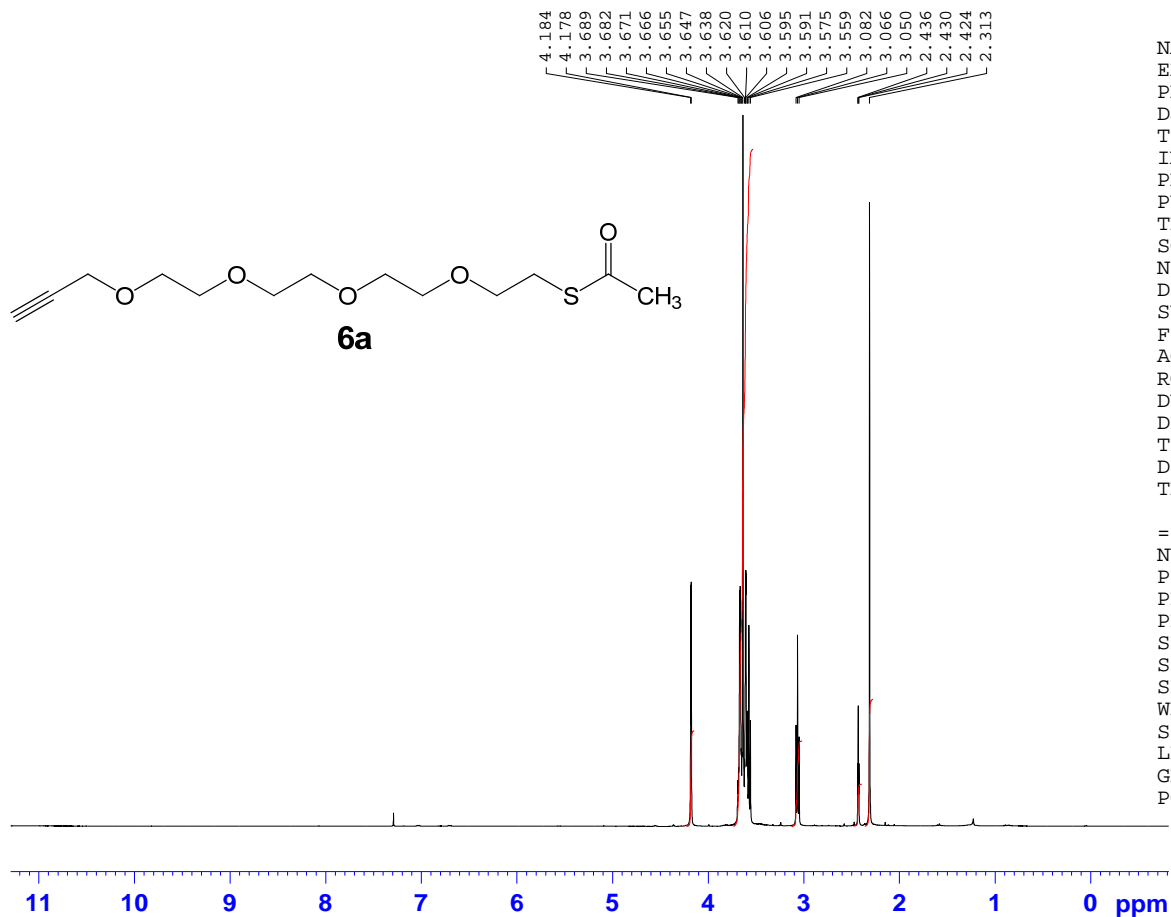

```

NAME      LG-811B_Alkyne-P4-SAc
EXPNO    1
PROCNO    1
Date_     20111020
Time      17.33
INSTRUM   spect
PROBHD    5 mm PABBO BB-
PULPROG   zg30
TD         65536
SOLVENT   CDCl3
NS         16
DS         2
SWH        8802.817 Hz
FIDRES     0.134320 Hz
AQ         3.7224948 sec
RG         28.5
DW         56.800 usec
DE         6.50 usec
TE         292.7 K
D1         1.00000000 sec
TD0        1
    
```

```

===== CHANNEL f1 =====
NUC1      1H
P1         14.85 usec
PL1        -0.60 dB
PL1W      13.81451130 W
SFO1      400.1320007 MHz
SI         32768
SF         400.1300000 MHz
WDW        EM
SSB        0
LB         0.30 Hz
GB         0
PC         1.00
    
```

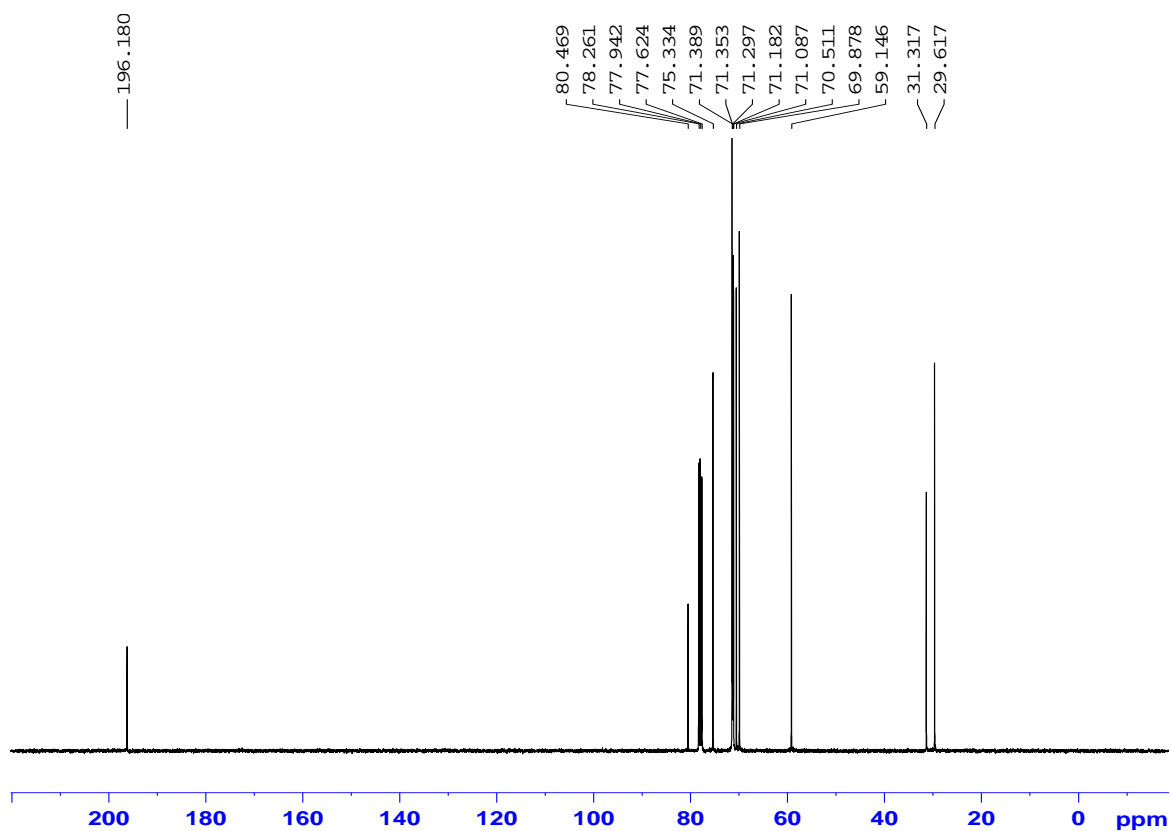

```

NAME      LG-811A_Alkyne-P4-SAc
EXPNO    2
PROCNO    1
Date_     20111020
Time      18.38
INSTRUM   spect
PROBHD    5 mm PABBO BB-
PULPROG   zgpg30
TD         65536
SOLVENT   CDCl3
NS         1024
DS         4
SWH        24038.461 Hz
FIDRES     0.366798 Hz
AQ         1.3631988 sec
RG         645
DW         20.800 usec
DE         6.50 usec
TE         294.9 K
D1         2.00000000 sec
D11        0.03000000 sec
TD0        1
    
```

```

===== CHANNEL f1 =====
NUC1      13C
P1         9.99 usec
PL1        -3.00 dB
PL1W      73.67452240 W
SFO1      100.6228298 MHz
    
```

```

===== CHANNEL f2 =====
CPDPRG2   waltz16
NUC2      1H
PCPD2     80.00 usec
PL2        -0.65 dB
PL12      13.40 dB
PL13      13.40 dB
PL2W      13.97447491 W
PL12W     0.54996562 W
PL13W     0.54996562 W
SFO2      400.1316005 MHz
SI         32768
SF         100.6126885 MHz
WDW        EM
SSB        0
LB         1.00 Hz
GB         0
PC         1.40
    
```

# Applied Biosystems Mariner System 5268

Mariner Spec /1:23 (T /0.00:0.39) ASC[BP = 313.1, 95]

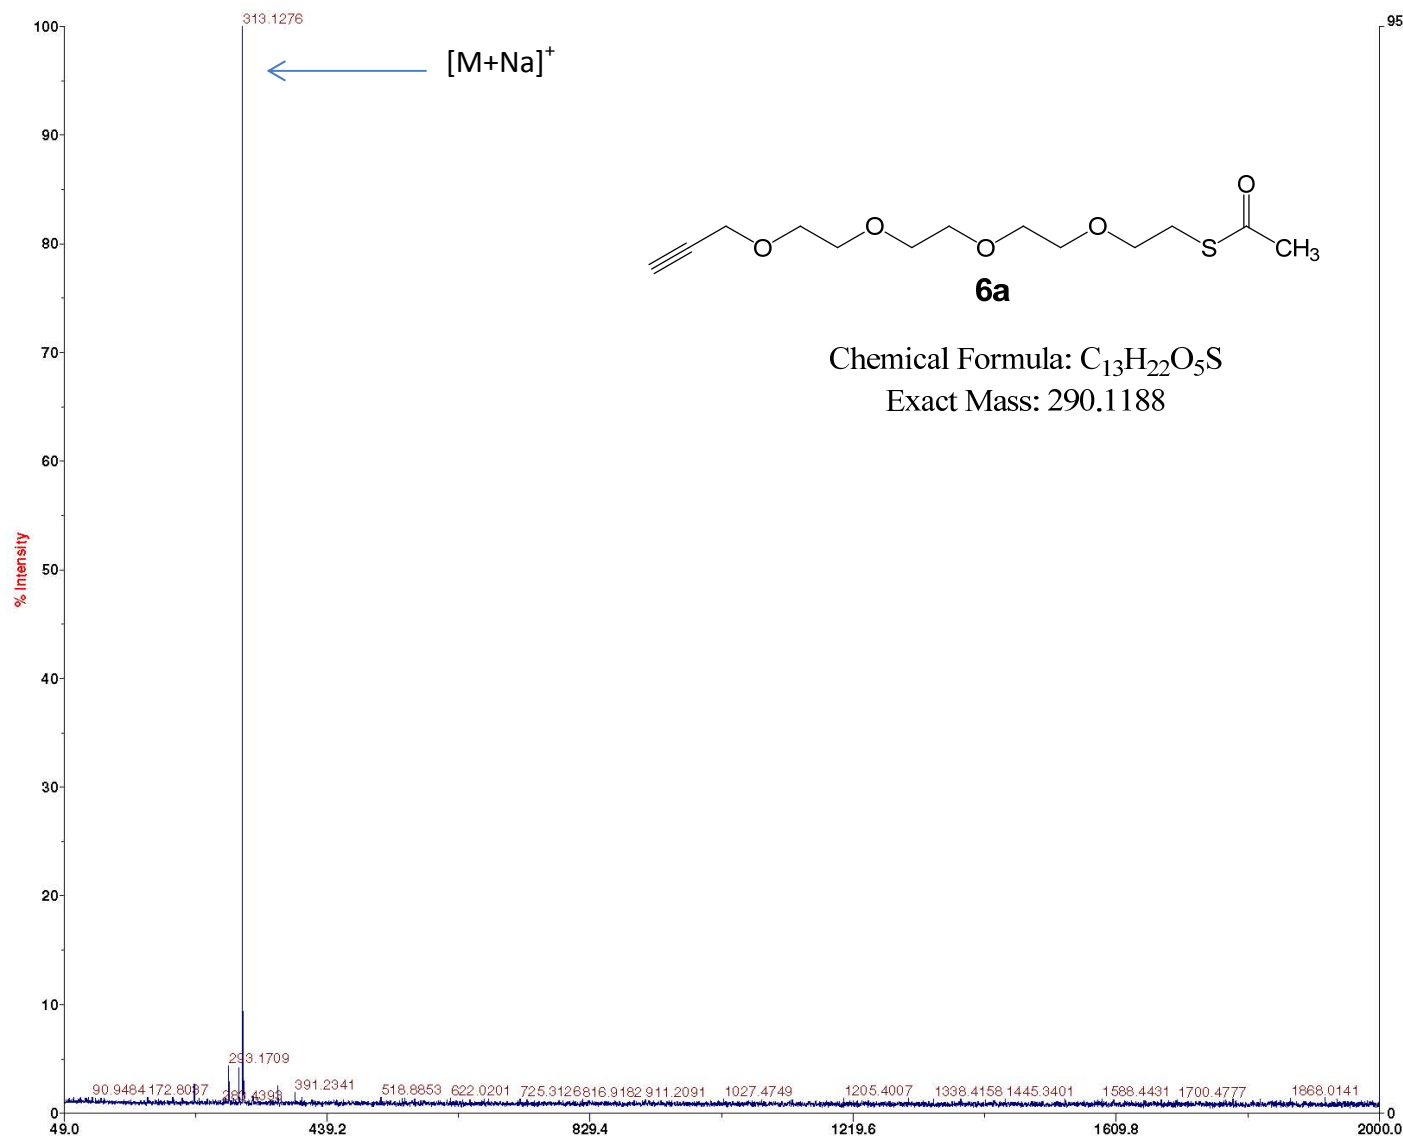

```
--> Mariner System State <--
Instrument State           ON
Ion Polarity              POS
Auxillary Gas             ON
Curtain Gas               ON
Nebulizer Gas            ON
Calibration Constant A    5.0146867E-007
Calibration Constant B    77.798312
TDC Deadtime              10
--> Source Settings <--
Spray Tip Potential        4509.96
SCIEX Heater              300.05
--> API Interface Settings <--
Nozzle Potential           40.04
Skimmer 1 Potential        10.01
Quadrupole DC Potential    5.49
Deflection Voltage         0.10
Einzel Lens Potential      -24.00
Quadrupole RF Voltage      999.76
Quadrupole Temperature     140.01
Nozzle Temperature         140.01
--> Analyzer Settings <--
Push Pulse Potential       490.00
Pull Pulse Potential        213.11
Pull Bias Potential         10.00
Acceleration Potential     3999.94
Reflector Potential         1549.99
Detector Voltage           1700.24
--> Spectrum Acquisition Settings <--
Seconds Per Spectrum        1.00
Ion Count Threshold         0.00
First Mass                  50.00
Last Mass                   2000.00
Accumulate Spectra         OFF
Standby at End of Acquisition OFF
--> Centroid Spectra Settings <--
Centroid Spectra           OFF
--> System Settings <--
Gas Control Mode           Manual
Syringe Pump Mode          Manual
Syringe Pump Rate          50.00
Syringe Diameter           3.26
Min Analyzer Mass          50.00
Max Analyzer Mass          4000.00
```

Acquired: Oct 24 08:47:00 2011  
Mariner Mass Spectrum  
C:\Mariner\Data\2011\Oct24 Mon\LNG-811002.dat

Printed: 08:48, October 24, 2011

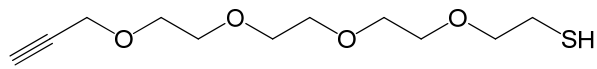

**7a**

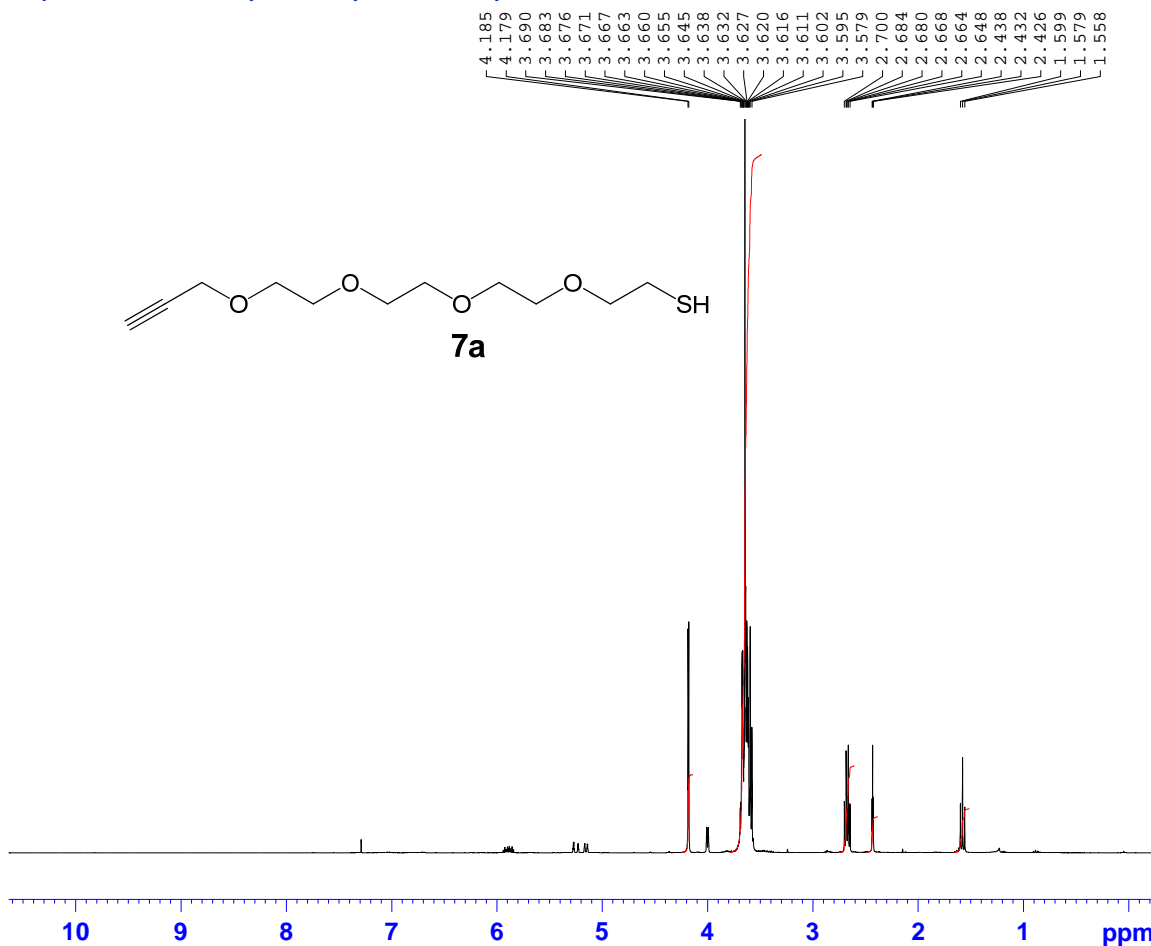

```

NAME      LG-813A_Alkyne-P4-SH
EXPNO     1
PROCNO    1
Date_     20111026
Time      18.47
INSTRUM   spect
PROBHD    5 mm PABBO BB-
PULPROG   zg30
TD         65536
SOLVENT   CDCl3
NS         16
DS         2
SWH        8802.817 Hz
FIDRES     0.134320 Hz
AQ         3.7224948 sec
RG         28.5
DW         56.800 usec
DE         6.50 usec
TE         292.4 K
D1         1.00000000 sec
TD0        1
    
```

```

===== CHANNEL f1 =====
NUC1      1H
P1        14.85 usec
PL1       -0.60 dB
PL1W      13.81451130 W
SFO1      400.1320007 MHz
SI        32768
SF        400.1300000 MHz
WDW       EM
SSB       0
LB        0.30 Hz
GB        0
PC        1.00
    
```

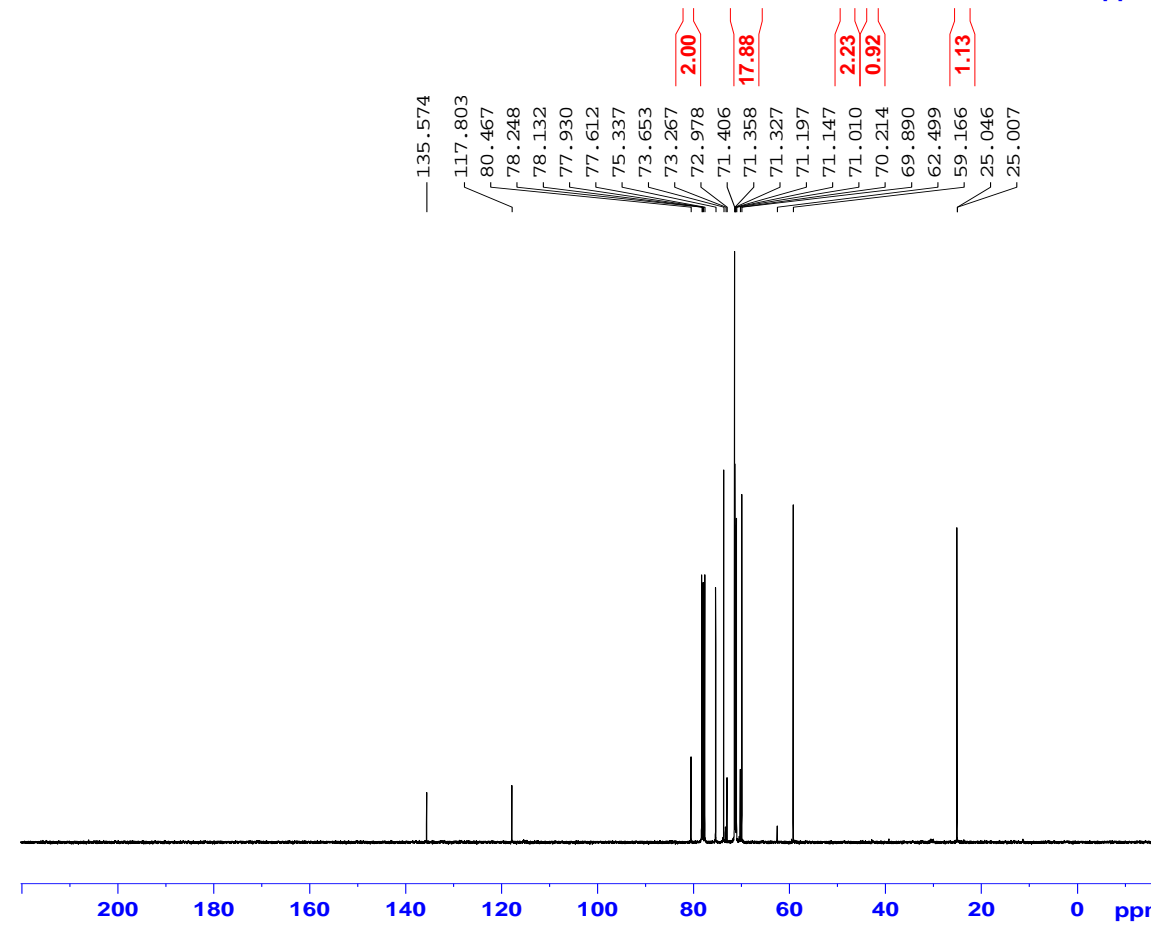

```

NAME      LG-813A_Alkyne-P4-SH
EXPNO     2
PROCNO    1
Date_     20111026
Time      19.48
INSTRUM   spect
PROBHD    5 mm PABBO BB-
PULPROG   zgpg30
TD         65536
SOLVENT   CDCl3
NS         1024
DS         4
SWH        24038.461 Hz
FIDRES     0.366798 Hz
AQ         1.3631988 sec
RG         80.6
DW         20.800 usec
DE         6.50 usec
TE         294.5 K
D1         2.00000000 sec
D11        0.03000000 sec
TD0        1
    
```

```

===== CHANNEL f1 =====
NUC1      13C
P1        9.99 usec
PL1       -3.00 dB
PL1W      73.67452240 W
SFO1      100.6228298 MHz
    
```

```

===== CHANNEL f2 =====
CPDPRG2   waltz16
NUC2      1H
PCPD2     80.00 usec
PL2       -0.65 dB
PL12      13.40 dB
PL13      13.40 dB
PL12W     13.97447491 W
PL12W    0.54996562 W
PL13W    0.54996562 W
SFO2      400.1316005 MHz
SI        32768
SF        100.6126885 MHz
WDW       EM
SSB       0
LB        1.00 Hz
GB        0
PC        1.40
    
```

Mariner Spec /1:38 (T /0.00:0.66) ASC[BP = 271.1, 1286]

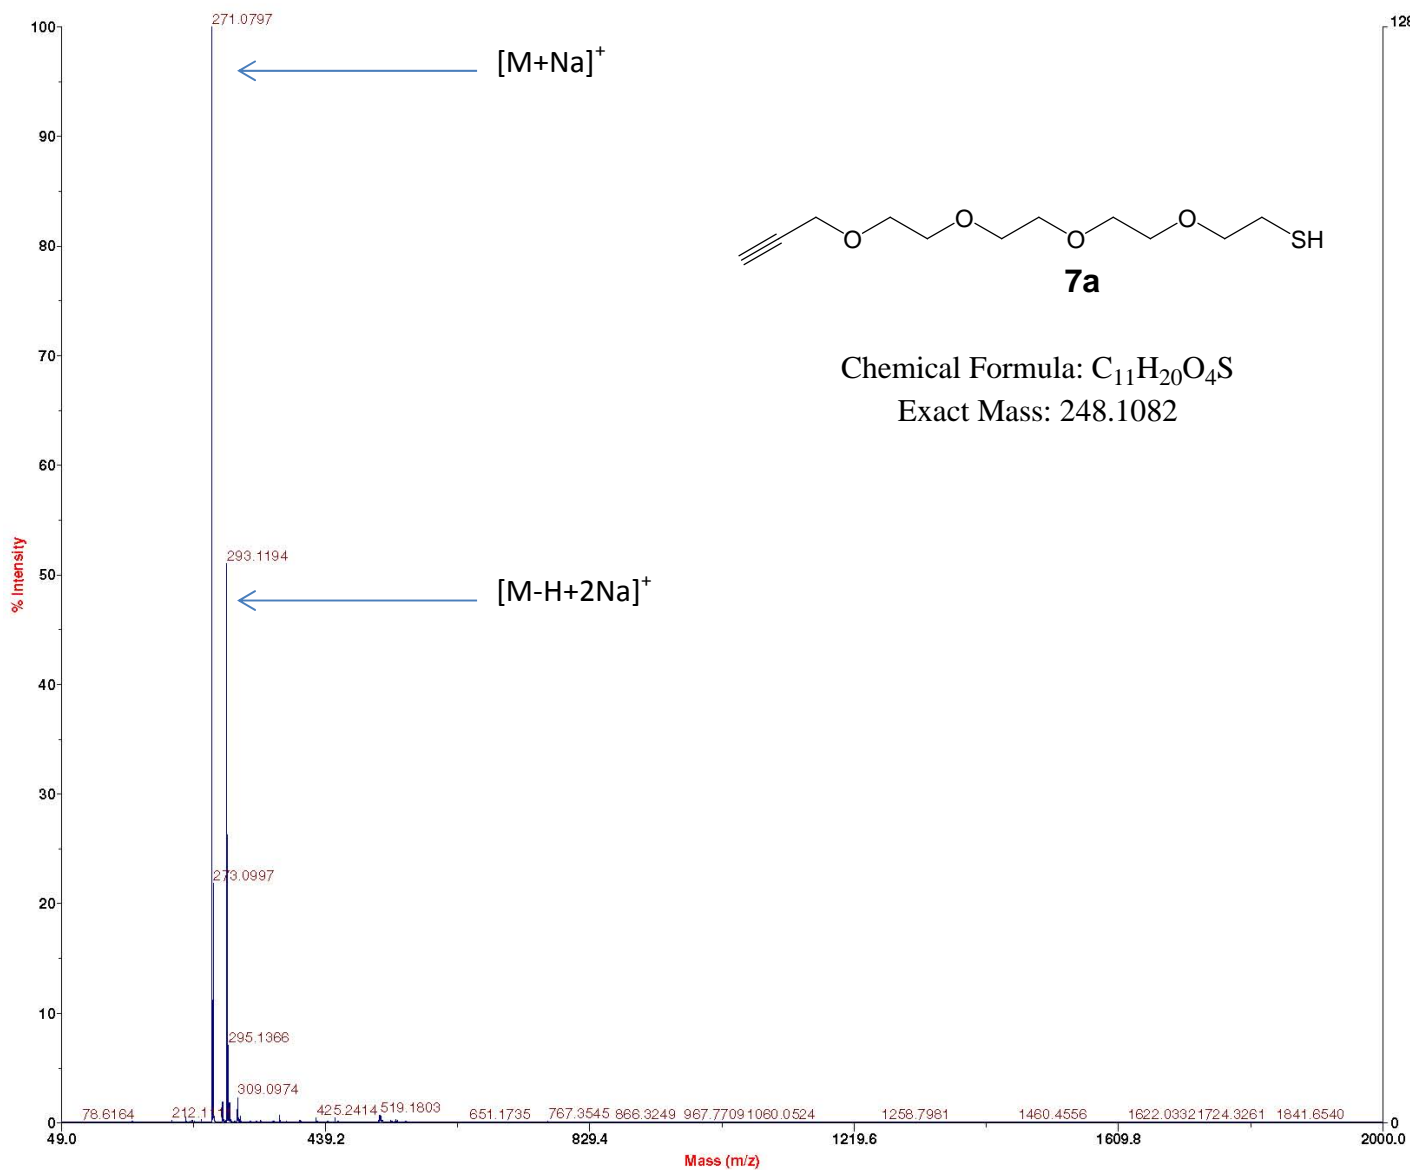

|                                       |                |
|---------------------------------------|----------------|
| --> Mariner System State <--          |                |
| Instrument State                      | ON             |
| Ion Polarity                          | POS            |
| Auxiliary Gas                         | ON             |
| Curtain Gas                           | ON             |
| Nebulizer Gas                         | ON             |
| Calibration Constant A                | 5.0146867E-007 |
| Calibration Constant B                | 77.798312      |
| TDC Deadtime                          | 10             |
| --> Source Settings <--               |                |
| Spray Tip Potential                   | 4509.96        |
| SCIEX Heater                          | 300.05         |
| --> API Interface Settings <--        |                |
| Nozzle Potential                      | 149.90         |
| Skimmer 1 Potential                   | 10.01          |
| Quadrupole DC Potential               | 5.49           |
| Deflection Voltage                    | 0.10           |
| Einzel Lens Potential                 | -24.00         |
| Quadrupole RF Voltage                 | 999.76         |
| Quadrupole Temperature                | 140.01         |
| Nozzle Temperature                    | 140.01         |
| --> Analyzer Settings <--             |                |
| Push Pulse Potential                  | 490.00         |
| Pull Pulse Potential                  | 213.11         |
| Pull Bias Potential                   | 10.00          |
| Acceleration Potential                | 3999.94        |
| Reflector Potential                   | 1549.99        |
| Detector Voltage                      | 1700.24        |
| --> Spectrum Acquisition Settings <-- |                |
| Seconds Per Spectrum                  | 1.00           |
| Ion Count Threshold                   | 0.00           |
| First Mass                            | 50.00          |
| Last Mass                             | 2000.00        |
| Accumulate Spectra                    | OFF            |
| Standby at End of Acquisition         | OFF            |
| --> Centroid Spectra Settings <--     |                |
| Centroid Spectra                      | OFF            |
| --> System Settings <--               |                |
| Gas Control Mode                      | Manual         |
| Syringe Pump Mode                     | Manual         |
| Syringe Pump Rate                     | 50.00          |
| Syringe Diameter                      | 3.26           |
| Min Analyzer Mass                     | 50.00          |
| Max Analyzer Mass                     | 4000.00        |

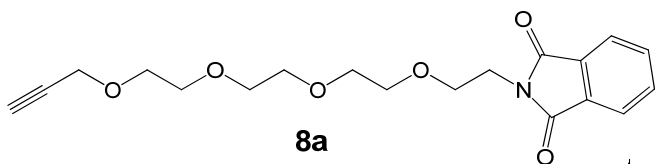

```

NAME      ZH3-130_Alk-P4-NPth
EXPNO     1
PROCNO    1
Date_     20111019
Time      21.04
INSTRUM   spect
PROBHD    5 mm PABBO BB-
PULPROG   zg30
TD        65536
SOLVENT   CDCl3
NS        16
DS        2
SWH       8802.817 Hz
FIDRES    0.134320 Hz
AQ        3.7224948 sec
RG        28.5
DW        56.800 usec
DE        6.50 usec
TE        292.4 K
D1        1.00000000 sec
TD0       1
    
```

```

===== CHANNEL f1 =====
NUC1      1H
P1        14.85 usec
PL1       -0.60 dB
PL1W      13.81451130 W
SFO1      400.1320007 MHz
SI        32768
SF        400.1300000 MHz
WDW       EM
SSB       0
LB        0.30 Hz
GB        0
PC        1.00
    
```

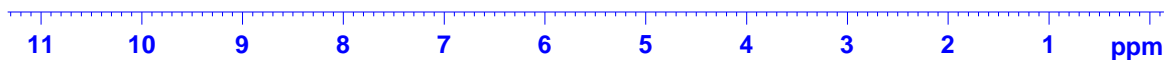

```

NAME      ZH3-130_Alk-P4-NPth
EXPNO     3
PROCNO    1
Date_     20111019
Time      22.05
INSTRUM   spect
PROBHD    5 mm PABBO BB-
PULPROG   zgpg30
TD        65536
SOLVENT   CDCl3
NS        1024
DS        4
SWH       24038.461 Hz
FIDRES    0.366798 Hz
AQ        1.3631988 sec
RG        724
DW        20.800 usec
DE        6.50 usec
TE        294.5 K
D1        2.00000000 sec
D11       0.03000000 sec
TD0       1
    
```

```

===== CHANNEL f1 =====
NUC1      13C
P1        9.99 usec
PL1       -3.00 dB
PL1W      73.67452240 W
SFO1      100.6228298 MHz
    
```

```

===== CHANNEL f2 =====
CPDPRG2   waltz16
NUC2      1H
PCPD2     80.00 usec
PL2       -0.65 dB
PL12      13.40 dB
PL13      13.40 dB
PL2W      13.97447491 W
PL12W     0.54996562 W
PL13W     0.54996562 W
SFO2      400.1316005 MHz
SI        32768
SF        100.6126885 MHz
WDW       EM
SSB       0
LB        1.00 Hz
GB        0
PC        1.40
    
```

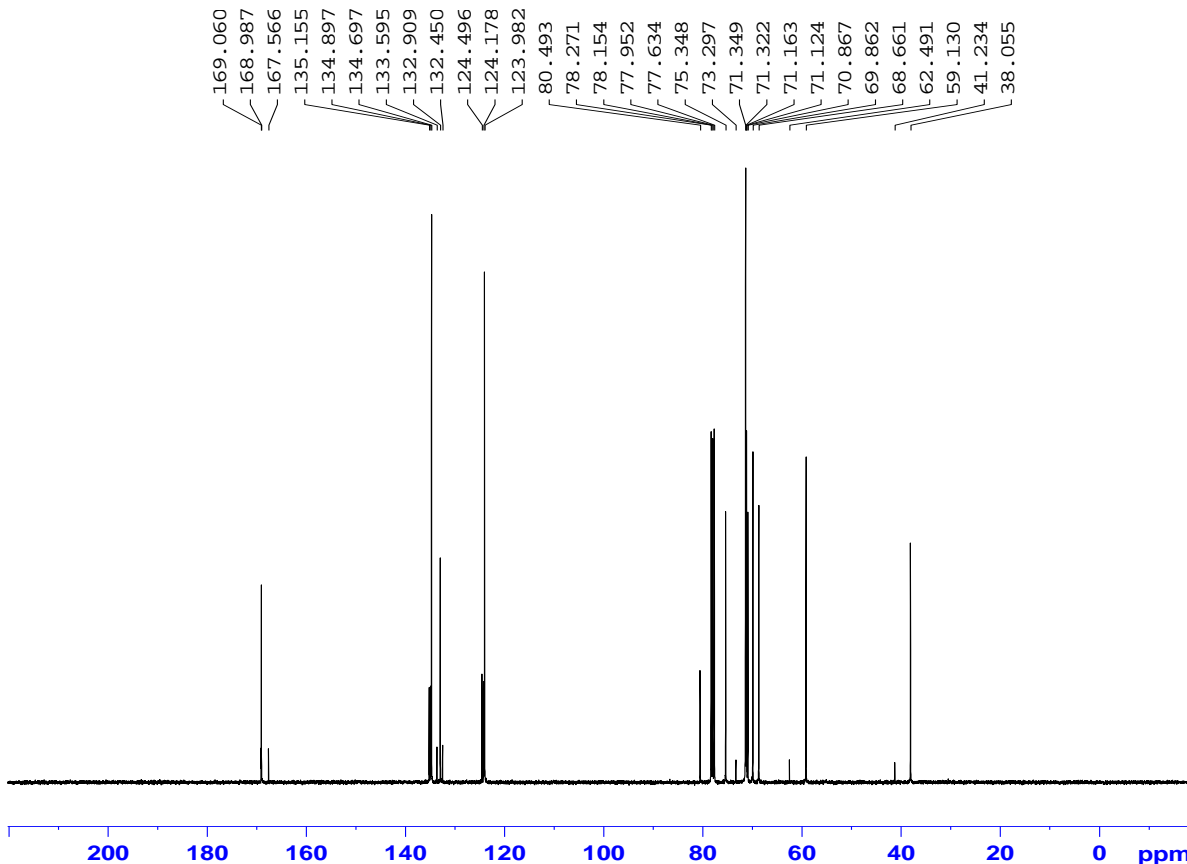

Mariner Spec /1:28 (T/0.00:0.48) ASC[BP = 384.1, 360]

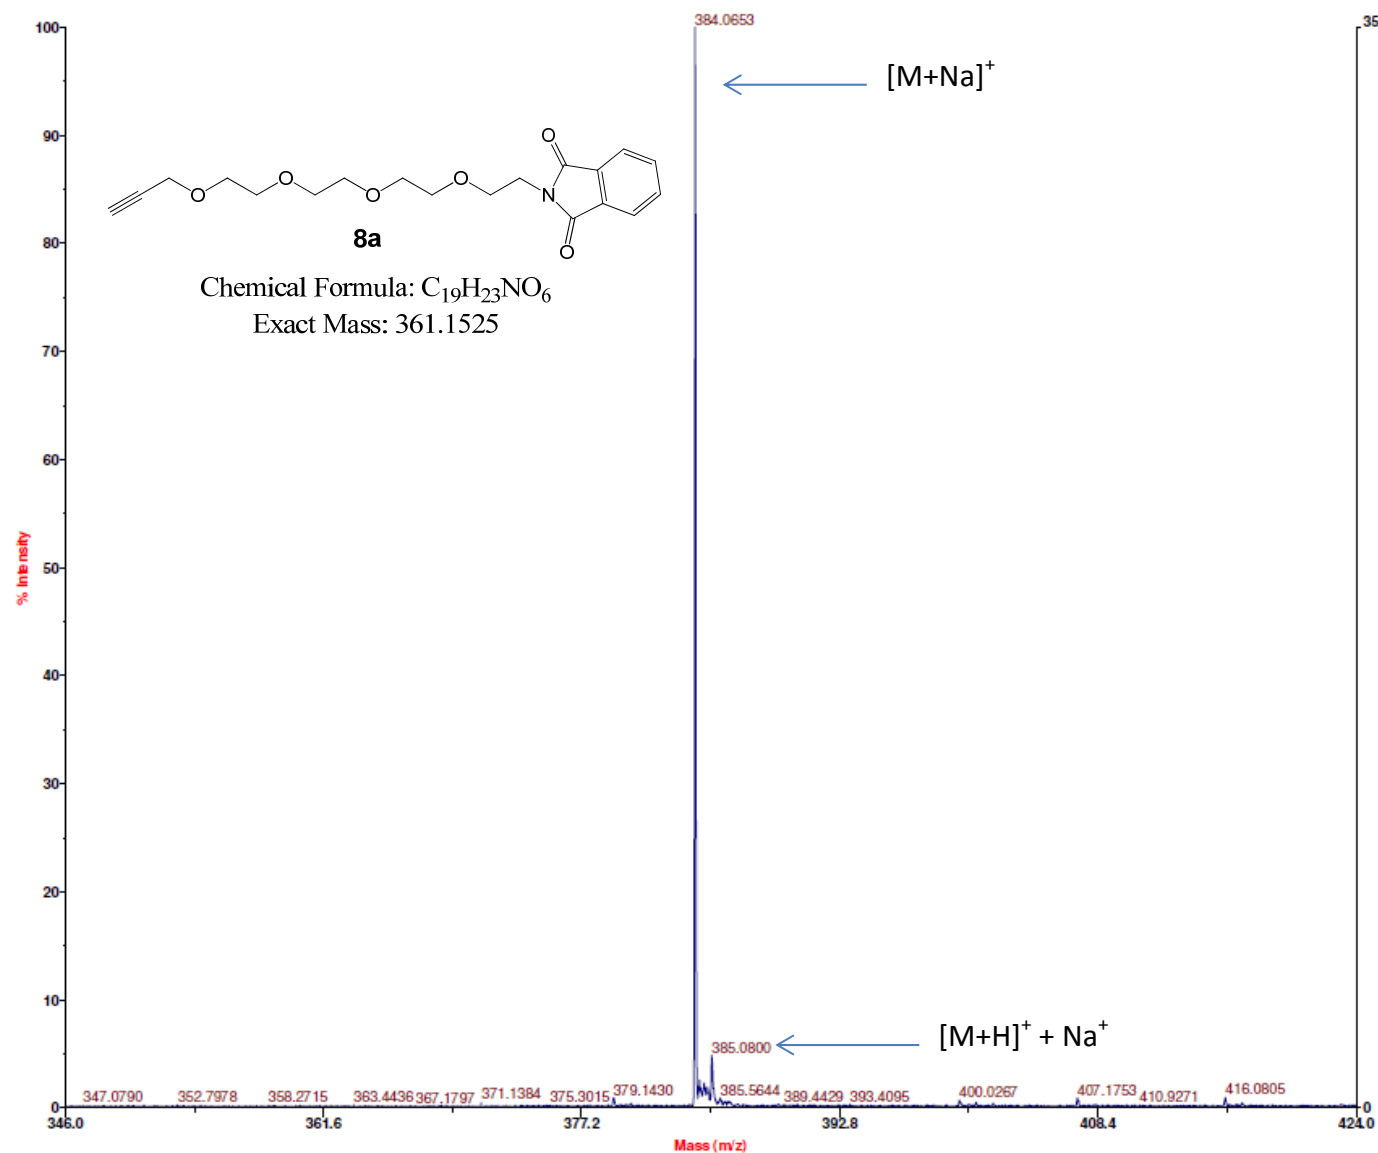

```

--> Mariner System State <--
Instrument State      ON
Ion Polarity         POS
Auxiliary Gas        ON
Curtain Gas          ON
Nebulizer Gas        ON
Calibration Constant A  5.0146867E-007
Calibration Constant B  77.798312
TDC Deadtime         10
--> Source Settings <--
Spray Tip Potential   4509.96
SCIEX Heater         300.05
--> API Interface Settings <--
Nozzle Potential      40.04
Skimmer 1 Potential   10.01
Quadrupole DC Potential  5.49
Deflection Voltage    0.10
Einzel Lens Potential -24.00
Quadrupole RF Voltage 999.76
Quadrupole Temperature 140.01
Nozzle Temperature    140.01
--> Analyzer Settings <--
Push Pulse Potential   490.00
Pull Pulse Potential   213.11
Pull Bias Potential    10.00
Acceleration Potential 3999.94
Reflector Potential    1549.99
Detector Voltage       1700.24
--> Spectrum Acquisition Settings <--
Seconds Per Spectrum   1.00
Ion Count Threshold    0.00
First Mass             50.00
Last Mass             2000.00
Accumulate Spectra    OFF
Standby at End of Acquisition OFF
--> Centroid Spectra Settings <--
Centroid Spectra      OFF
--> System Settings <--
Gas Control Mode       Manual
Syringe Pump Mode      Manual
Syringe Pump Rate      50.00
Syringe Diameter       3.26
Min Analyzer Mass      50.00
Max Analyzer Mass      4000.00

```

Acquired: Oct 18 14:52:00 2011  
Mariner Mass Spectrum  
C:\Mariner\Data\2011\Oct\18 Tues\ZH3-130001.dat

Printed: 14:53, October 18, 2011

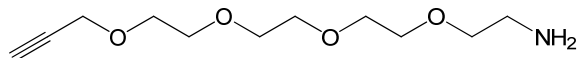

**9a**

3.931  
3.927  
3.415  
3.411  
3.389  
3.385  
3.362  
3.357  
3.314  
3.310  
3.306  
3.302  
3.245  
3.223  
3.223  
3.219  
3.219  
2.586  
2.573  
2.560  
2.323  
2.317  
2.312  
1.466

```

NAME      ZH3-132_Alk-P4-NH2
EXPNO    1
PROCNO   1
Date_    20111019
Time     23.09
INSTRUM  spect
PROBHD   5 mm PABBO BB-
PULPROG  zg30
TD       65536
SOLVENT  CDCl3
NS       16
DS       2
SWH      8802.817 Hz
FIDRES   0.134320 Hz
AQ       3.7224948 sec
RG       10
DW       56.800 usec
DE       6.50 usec
TE       292.6 K
D1       1.00000000 sec
TD0     1
    
```

```

===== CHANNEL f1 =====
NUC1     1H
P1       14.85 usec
PL1      -0.60 dB
PL1W     13.81451130 W
SFO1     400.1320007 MHz
SI       32768
SF       400.1300000 MHz
WDW      EM
SSB      0
LB       0.30 Hz
GB       0
PC       1.00
    
```

10 9 8 7 6 5 4 3 2 1 ppm

2.00  
12.63  
1.64  
1.57  
0.76  
1.52

80.309  
78.642  
78.320  
77.999  
75.521  
75.469  
73.982  
73.570  
71.123  
71.095  
71.053  
71.008  
70.907  
70.803  
69.992  
69.608  
61.593  
58.857  
42.338

```

NAME      ZH3-132_Alk-P4-NH2
EXPNO    2
PROCNO   1
Date_    20111020
Time     0.11
INSTRUM  spect
PROBHD   5 mm PABBO BB-
PULPROG  zgpg30
TD       65536
SOLVENT  CDCl3
NS       1024
DS       4
SWH      24038.461 Hz
FIDRES   0.366798 Hz
AQ       1.3631988 sec
RG       80.6
DW       20.800 usec
DE       6.50 usec
TE       294.5 K
D1       2.00000000 sec
D11     0.03000000 sec
TD0     1
    
```

```

===== CHANNEL f1 =====
NUC1     13C
P1       9.99 usec
PL1      -3.00 dB
PL1W     73.67452240 W
SFO1     100.6228298 MHz
    
```

```

===== CHANNEL f2 =====
CPDPRG2  waltz16
NUC2     1H
PCPD2    80.00 usec
PL2      -0.65 dB
PL12     13.40 dB
PL13     13.40 dB
PL2W     13.97447491 W
PL12W    0.54996562 W
PL13W    0.54996562 W
SFO2     400.1316005 MHz
SI       32768
SF       100.6126885 MHz
WDW      EM
SSB      0
LB       1.00 Hz
GB       0
PC       1.40
    
```

200 180 160 140 120 100 80 60 40 20 0 ppm

Mariner Spec /1:30 (T /0.00:0.52) ASC[BP = 232.2, 12139]

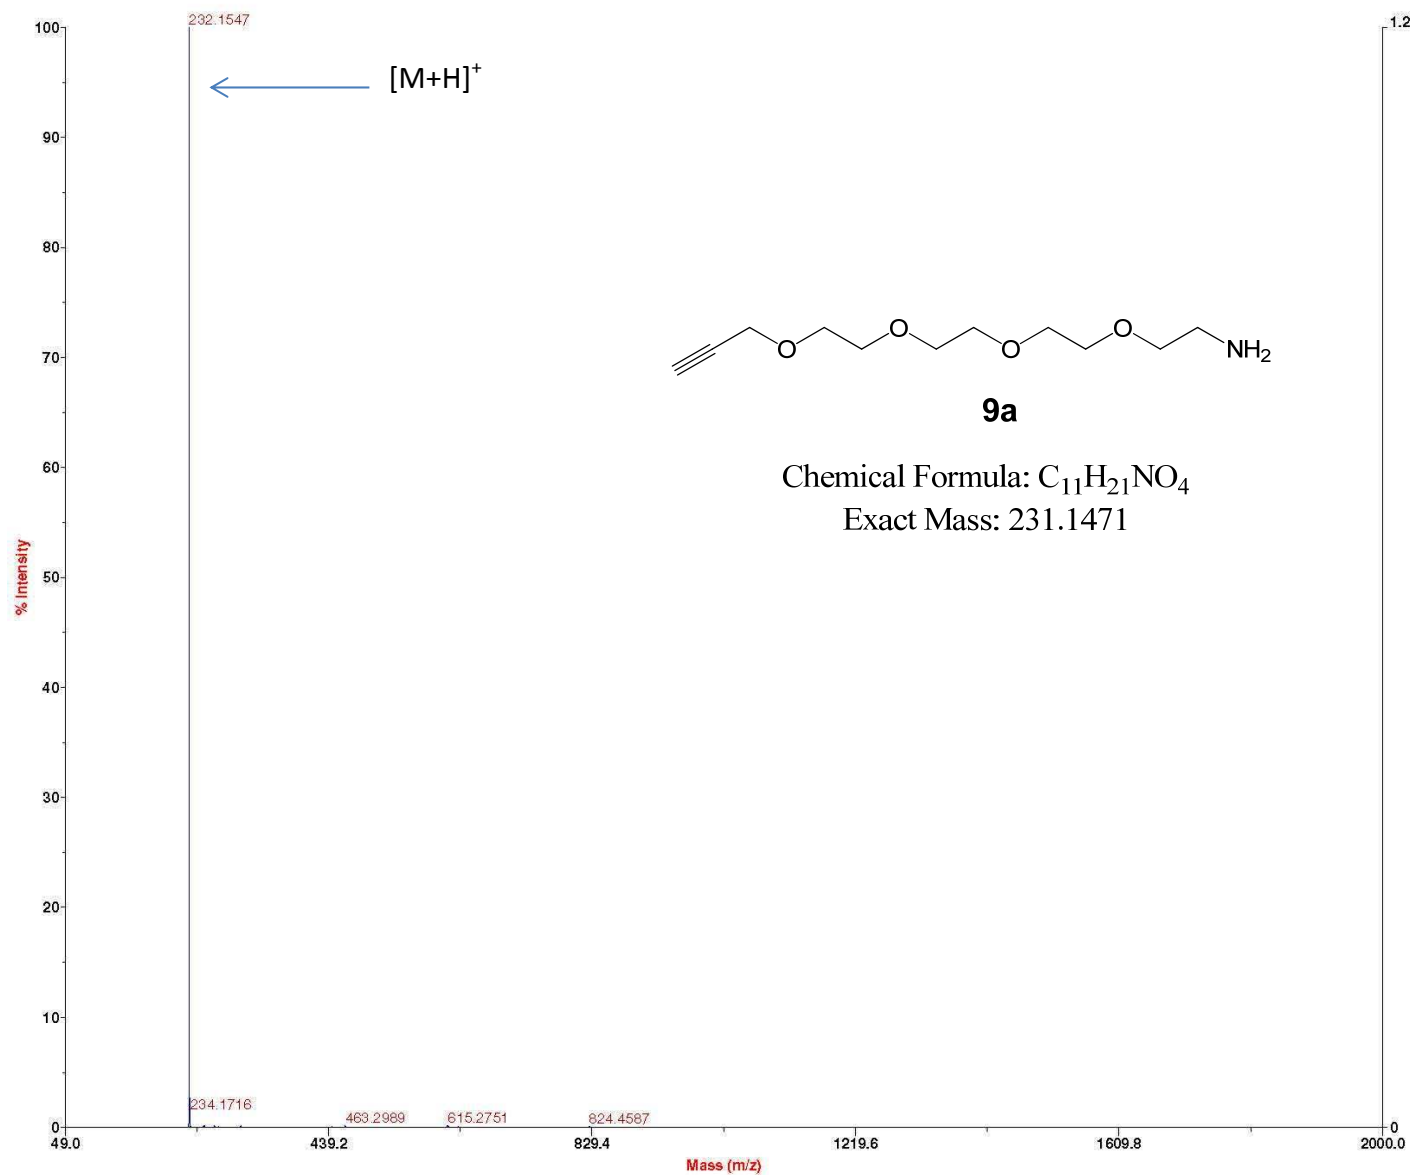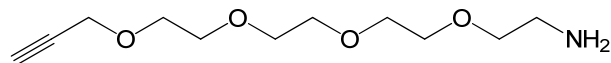

9a

Chemical Formula:  $C_{11}H_{21}NO_4$   
Exact Mass: 231.1471

--> Mariner System State <--  
Instrument State ON  
Ion Polarity POS  
Auxiliary Gas ON  
Curtain Gas ON  
Nebulizer Gas ON  
Calibration Constant A 5.0149194E-007  
Calibration Constant B 78.267402  
TDC Deadtime 10  
--> Source Settings <--  
Spray Tip Potential 4509.96  
SCIEX Heater 300.05  
--> API Interface Settings <--  
Nozzle Potential 120.12  
Skimmer 1 Potential 10.01  
Quadrupole DC Potential 5.49  
Deflection Voltage 0.10  
Einzel Lens Potential -24.00  
Quadrupole RF Voltage 999.76  
Quadrupole Temperature 140.01  
Nozzle Temperature 140.01  
--> Analyzer Settings <--  
Push Pulse Potential 490.00  
Pull Pulse Potential 213.11  
Pull Bias Potential 10.00  
Acceleration Potential 3999.94  
Reflector Potential 1549.99  
Detector Voltage 1700.24  
--> Spectrum Acquisition Settings <--  
Seconds Per Spectrum 1.00  
Ion Count Threshold 0.00  
First Mass 50.00  
Last Mass 2000.00  
Accumulate Spectra OFF  
Standby at End of Acquisition OFF  
--> Centroid Spectra Settings <--  
Centroid Spectra OFF  
--> System Settings <--  
Gas Control Mode Manual  
Syringe Pump Mode Manual  
Syringe Pump Rate 80.00  
Syringe Diameter 3.26  
Min Analyzer Mass 50.00  
Max Analyzer Mass 4000.00



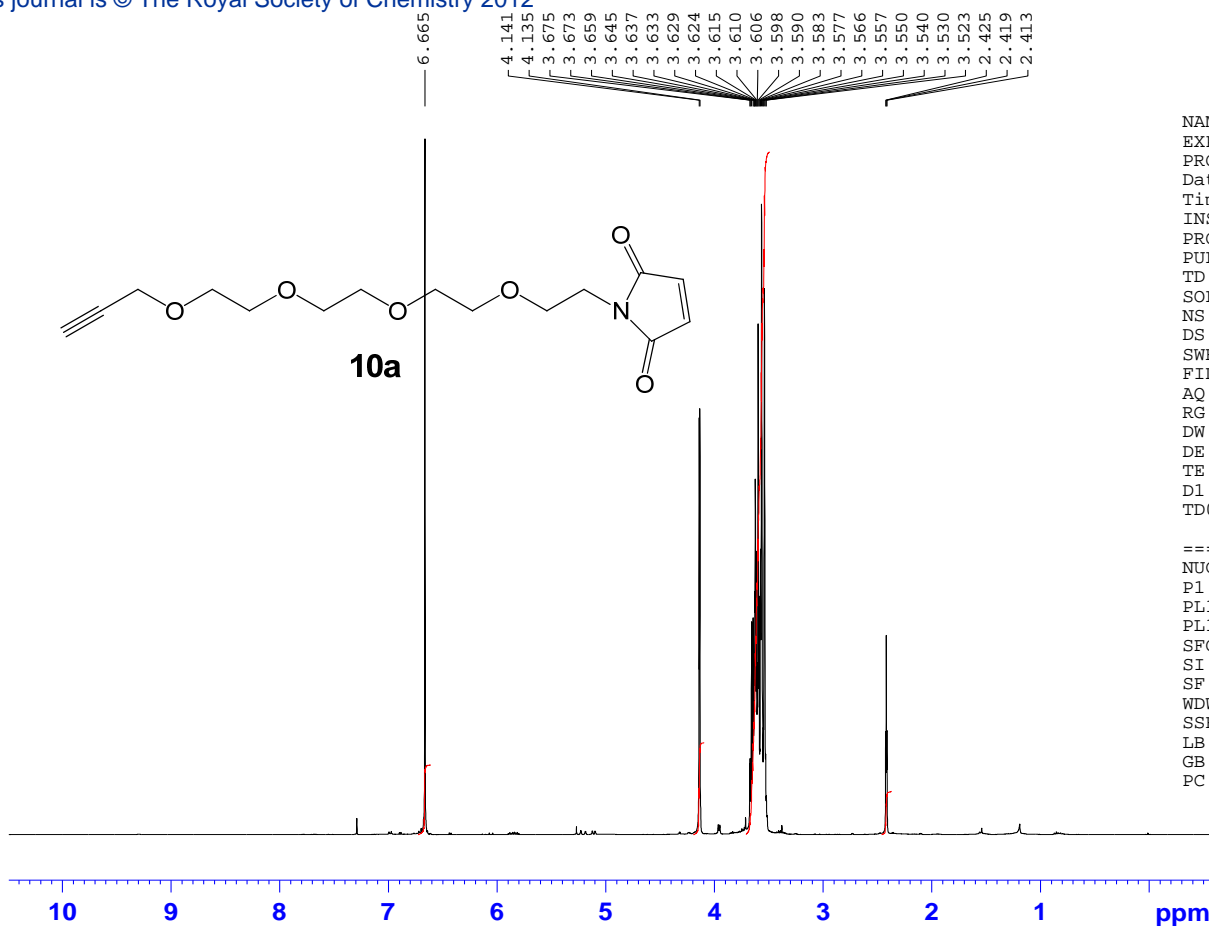

```

NAME      ZH3-133-A_Alk-P4-Ma1
EXPNO    1
PROCNO   1
Date_    20111025
Time     1.20
INSTRUM  spect
PROBHD   5 mm PABBO BB-
PULPROG  zg30
TD       65536
SOLVENT  CDCl3
NS       16
DS       2
SWH      8802.817 Hz
FIDRES   0.134320 Hz
AQ       3.7224948 sec
RG       22.6
DW       56.800 usec
DE       6.50 usec
TE       292.5 K
D1       1.00000000 sec
TD0      1
    
```

```

===== CHANNEL f1 =====
NUC1     1H
P1       14.85 usec
PL1     -0.60 dB
PL1W    13.81451130 W
SFO1    400.1320007 MHz
SI       32768
SF       400.1300000 MHz
WDW      EM
SSB      0
LB       0.30 Hz
GB       0
PC       1.00
    
```

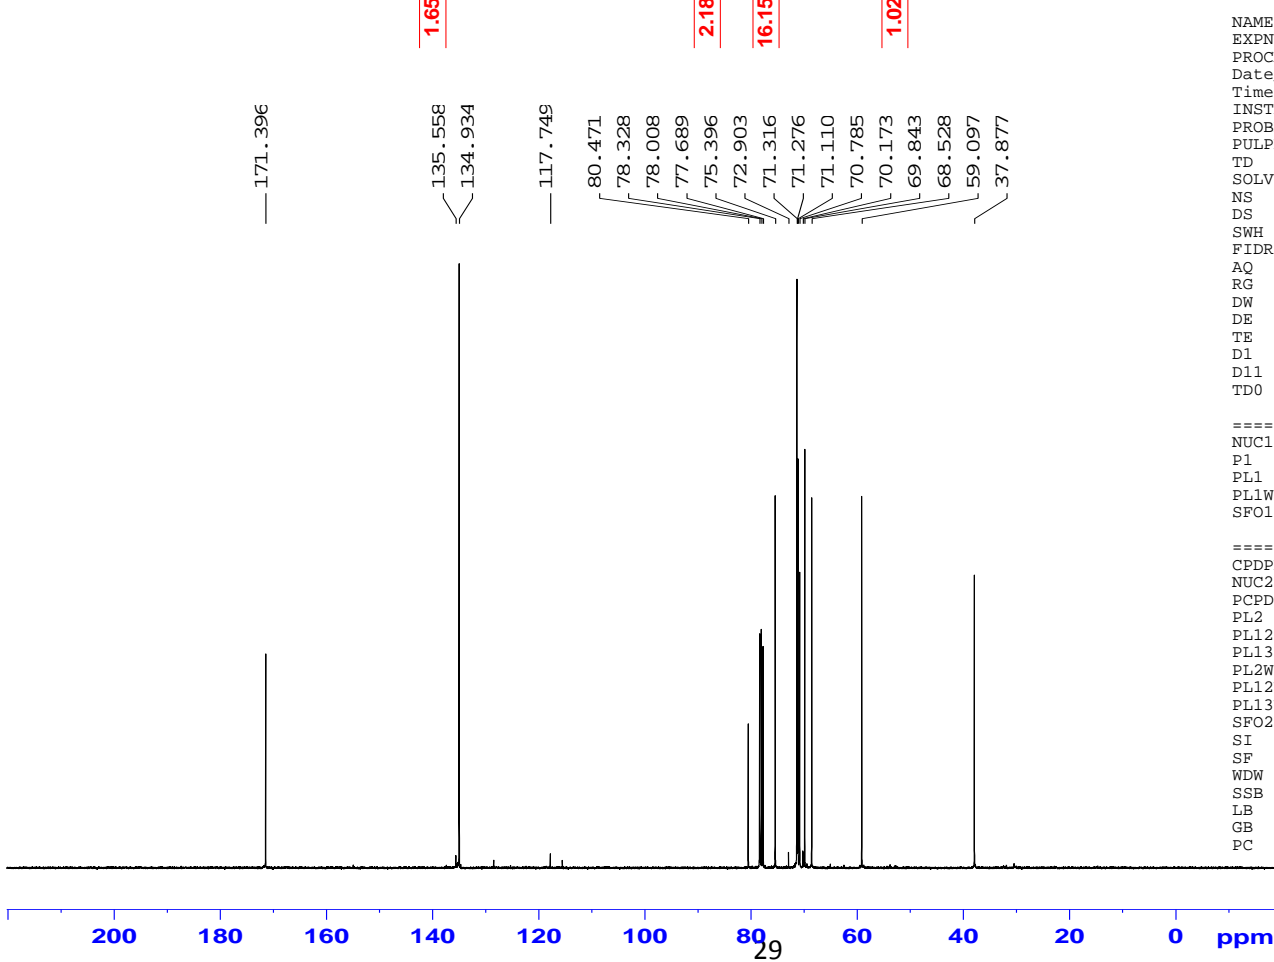

```

NAME      ZH3-133-A_Alk-P4-Ma1
EXPNO    2
PROCNO   1
Date_    20111025
Time     2.21
INSTRUM  spect
PROBHD   5 mm PABBO BB-
PULPROG  zgpg30
TD       65536
SOLVENT  CDCl3
NS       1024
DS       4
SWH      24038.461 Hz
FIDRES   0.366798 Hz
AQ       1.3631988 sec
RG       812
DW       20.800 usec
DE       6.50 usec
TE       294.4 K
D1       2.00000000 sec
D11      0.03000000 sec
TD0      1
    
```

```

===== CHANNEL f1 =====
NUC1     13C
P1       9.99 usec
PL1     -3.00 dB
PL1W    73.67452240 W
SFO1    100.6228298 MHz

===== CHANNEL f2 =====
CPDPRG2  waltz16
NUC2     1H
PCPD2    80.00 usec
PL2     -0.65 dB
PL3     13.40 dB
PL12    13.40 dB
PL13    13.40 dB
PL2W    13.97447491 W
PL12W   0.54996562 W
PL13W   0.54996562 W
SFO2    400.1316005 MHz
SI       32768
SF       100.6126885 MHz
WDW      EM
SSB      0
LB       1.00 Hz
GB       0
PC       1.40
    
```

Mariner Spec /1:24 (T/0.00:0.41) ASC[BP = 334.2, 338]

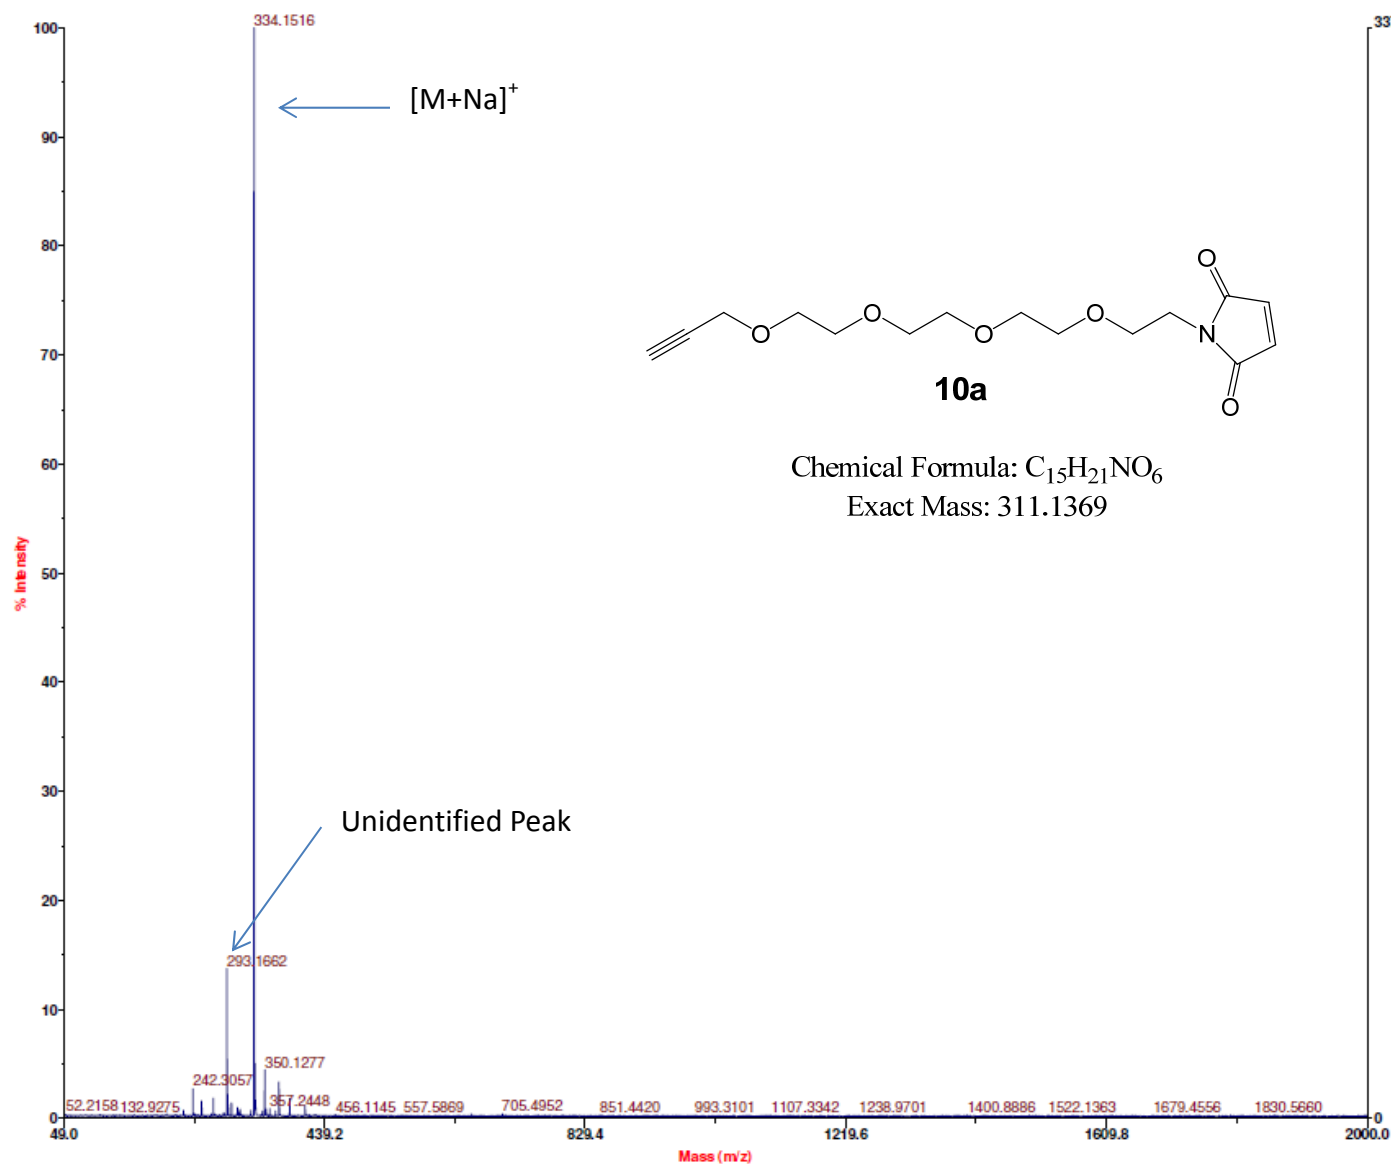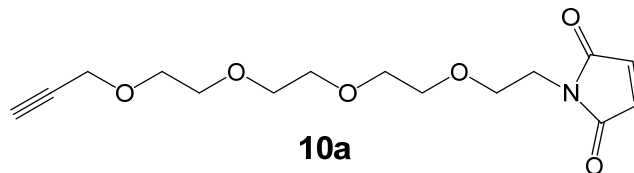

10a

Chemical Formula:  $C_{15}H_{21}NO_6$

Exact Mass: 311.1369

--> Mariner System State <--  
Instrument State ON  
Ion Polarity POS  
Auxiliary Gas ON  
Curtain Gas ON  
Nebulizer Gas ON  
Calibration Constant A 5.0146867E-007  
Calibration Constant B 77.798312  
TDC Deadtime 10  
--> Source Settings <--  
Spray Tip Potential 4509.96  
SCIEX Heater 300.05  
--> API Interface Settings <--  
Nozzle Potential 40.04  
Skimmer 1 Potential 10.01  
Quadrupole DC Potential 5.49  
Deflection Voltage 0.10  
Einzel Lens Potential -24.00  
Quadrupole RF Voltage 999.76  
Quadrupole Temperature 140.01  
Nozzle Temperature 140.01  
--> Analyzer Settings <--  
Push Pulse Potential 490.00  
Pull Pulse Potential 213.11  
Pull Bias Potential 10.00  
Acceleration Potential 3999.94  
Reflector Potential 1549.99  
Detector Voltage 1700.24  
--> Spectrum Acquisition Settings <--  
Seconds Per Spectrum 1.00  
Ion Count Threshold 0.00  
First Mass 50.00  
Last Mass 2000.00  
Accumulate Spectra OFF  
Standby at End of Acquisition OFF  
--> Centroid Spectra Settings <--  
Centroid Spectra OFF  
--> System Settings <--  
Gas Control Mode Manual  
Syringe Pump Mode Manual  
Syringe Pump Rate 50.00  
Syringe Diameter 3.26  
Min Analyzer Mass 50.00  
Max Analyzer Mass 4000.00

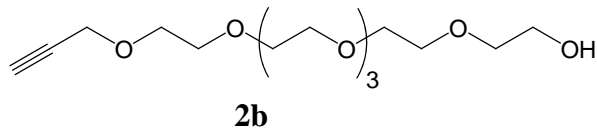

4.007  
 4.001  
 3.489  
 3.486  
 3.458  
 3.404  
 3.394  
 2.385

```

NAME      ZH3-134-C_Alk-P6-OH
EXPNO     1
PROCNO    1
Date_     20111024
Time      23.15
INSTRUM   spect
PROBHD    5 mm PABBO BB-
PULPROG   zg30
TD        65536
SOLVENT   CDC13
NS        16
DS        2
SWH       8802.817 Hz
FIDRES    0.134320 Hz
AQ        3.7224948 sec
RG        10
DW        56.800 usec
DE        6.50 usec
TE        292.5 K
D1        1.00000000 sec
TD0       1
    
```

```

===== CHANNEL f1 =====
NUC1      1H
P1        14.85 usec
PL1       -0.60 dB
PL1W      13.81451130 W
SFO1      400.1320007 MHz
SI        32768
SF        400.1300000 MHz
WDW       EM
SSB       0
LB        0.30 Hz
GB        0
PC        1.00
    
```

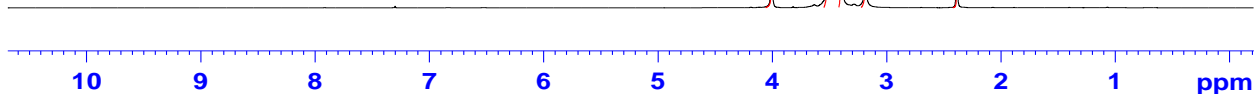

2.40  
 24.35  
 2.39  
 1.00  
 1.16

```

NAME      ZH3-134-C_Alk-P6-OH
EXPNO     2
PROCNO    1
Date_     20111025
Time      0.15
INSTRUM   spect
PROBHD    5 mm PABBO BB-
PULPROG   zgpg30
TD        65536
SOLVENT   CDC13
NS        1024
DS        4
SWH       24038.461 Hz
FIDRES    0.366798 Hz
AQ        1.3631988 sec
RG        575
DW        20.800 usec
DE        6.50 usec
TE        294.4 K
D1        2.00000000 sec
D11       0.03000000 sec
TD0       1
    
```

```

===== CHANNEL f1 =====
NUC1      13C
P1        9.99 usec
PL1       -3.00 dB
PL1W      73.67452240 W
SFO1      100.6228298 MHz
    
```

```

===== CHANNEL f2 =====
CPDPRG2   waltz16
NUC2      1H
PCPD2     80.00 usec
PL2       -0.65 dB
PL12      13.40 dB
PL13      13.40 dB
PL2W      13.97447491 W
PL12W     0.54996562 W
PL13W     0.54996562 W
SFO2      400.1316005 MHz
SI        32768
SF        100.6126885 MHz
WDW       EM
SSB       0
LB        1.00 Hz
GB        0
PC        1.40
    
```

80.369  
 78.597  
 78.275  
 77.954  
 75.586  
 73.260  
 71.166  
 71.142  
 70.962  
 70.934  
 69.670  
 62.110  
 58.935

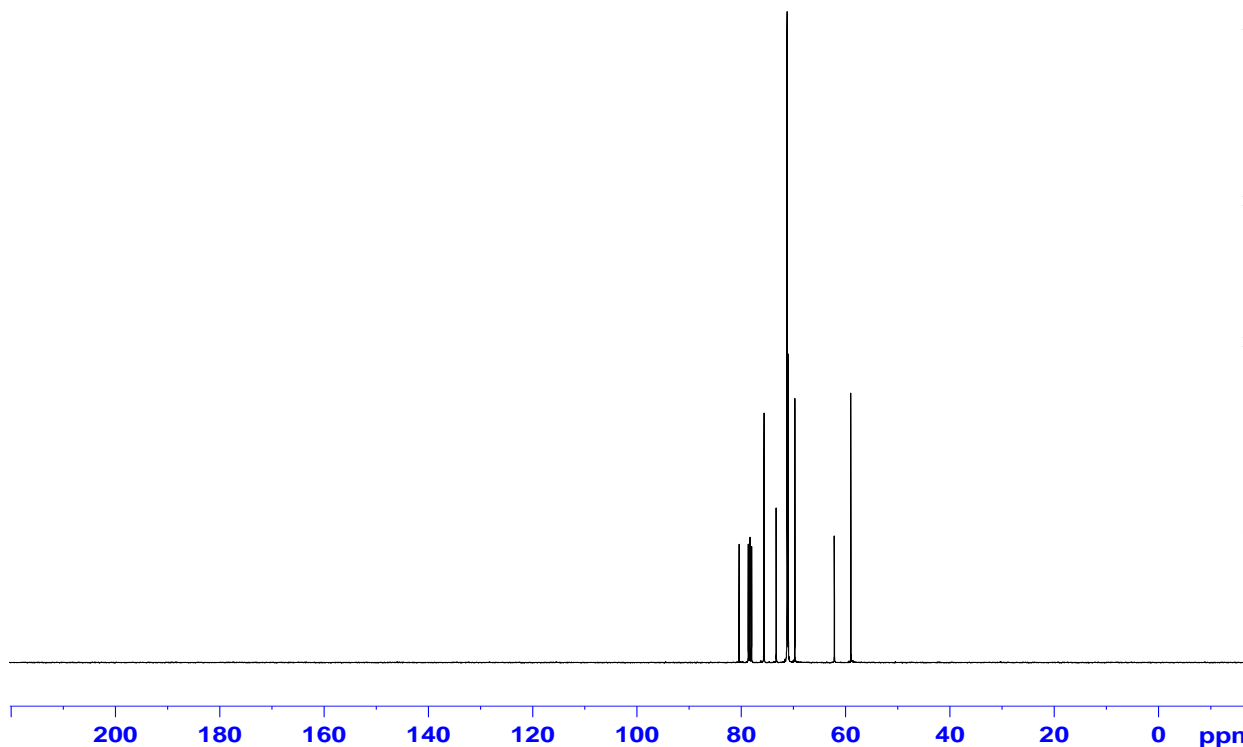

Mariner Spec /1:34 (T/0.00:0.59) ASC[BP = 343.2, 186]

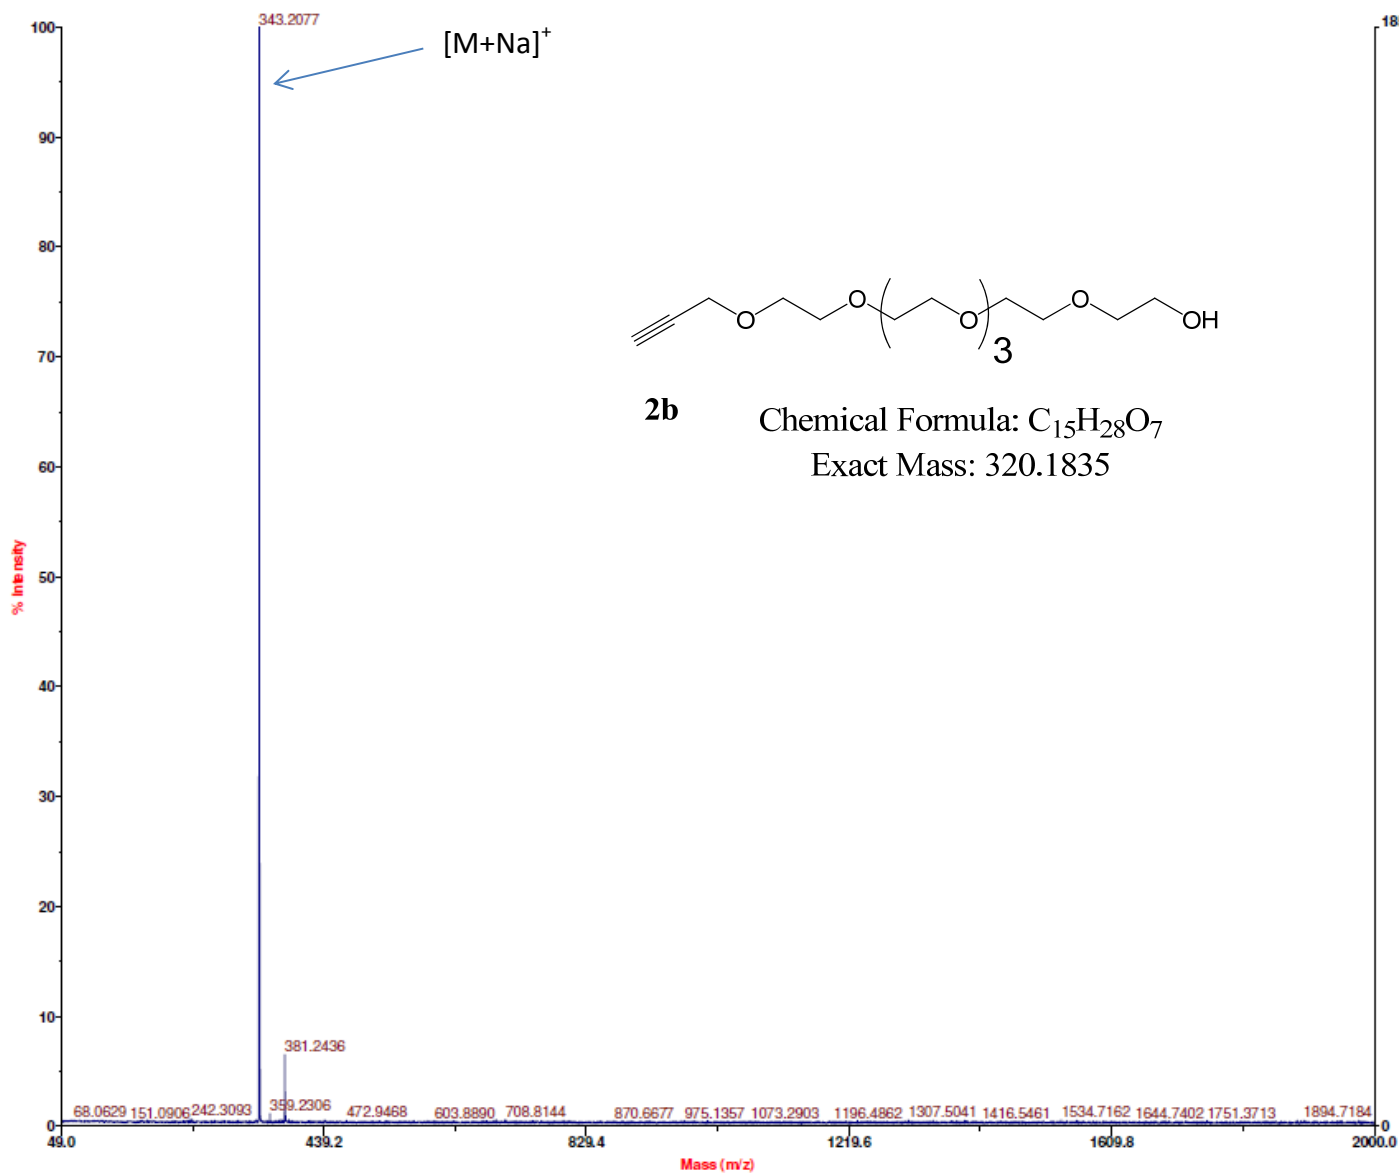

|                                       |                |
|---------------------------------------|----------------|
| --> Mariner System State <--          |                |
| Instrument State                      | ON             |
| Ion Polarity                          | POS            |
| Auxiliary Gas                         | ON             |
| Curtain Gas                           | ON             |
| Nebulizer Gas                         | ON             |
| Calibration Constant A                | 5.0146867E-007 |
| Calibration Constant B                | 77.798312      |
| TDC Deadtime                          | 10             |
| --> Source Settings <--               |                |
| Spray Tip Potential                   | 4509.96        |
| SCIEX Heater                          | 300.05         |
| --> API Interface Settings <--        |                |
| Nozzle Potential                      | 40.04          |
| Skimmer 1 Potential                   | 10.01          |
| Quadrupole DC Potential               | 5.49           |
| Deflection Voltage                    | 0.10           |
| Einzel Lens Potential                 | -24.00         |
| Quadrupole RF Voltage                 | 999.76         |
| Quadrupole Temperature                | 140.01         |
| Nozzle Temperature                    | 140.01         |
| --> Analyzer Settings <--             |                |
| Push Pulse Potential                  | 490.00         |
| Pull Pulse Potential                  | 213.11         |
| Pull Bias Potential                   | 10.00          |
| Acceleration Potential                | 3999.94        |
| Reflector Potential                   | 1549.99        |
| Detector Voltage                      | 1700.24        |
| --> Spectrum Acquisition Settings <-- |                |
| Seconds Per Spectrum                  | 1.00           |
| Ion Count Threshold                   | 0.00           |
| First Mass                            | 50.00          |
| Last Mass                             | 2000.00        |
| Accumulate Spectra                    | OFF            |
| Standby at End of Acquisition         | OFF            |
| --> Centroid Spectra Settings <--     |                |
| Centroid Spectra                      | OFF            |
| --> System Settings <--               |                |
| Gas Control Mode                      | Manual         |
| Syringe Pump Mode                     | Manual         |
| Syringe Pump Rate                     | 50.00          |
| Syringe Diameter                      | 3.26           |
| Min Analyzer Mass                     | 50.00          |
| Max Analyzer Mass                     | 4000.00        |

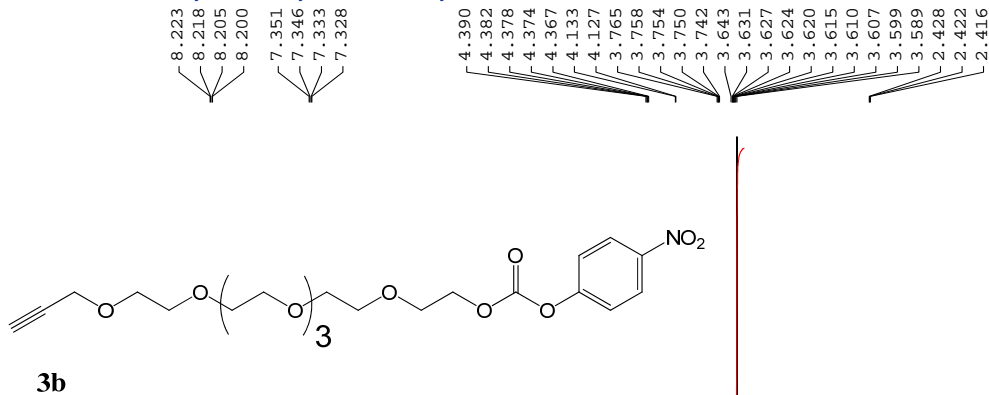

```

NAME      ZH3-136_Alk-P6-PNPC
EXPNO     1
PROCNO    1
Date_     20111026
Time      21.59
INSTRUM   spect
PROBHD    5 mm PABBO BB-
PULPROG   zg30
TD         65536
SOLVENT   CDC13
NS         16
DS         2
SWH        8802.817 Hz
FIDRES     0.134320 Hz
AQ         3.7224948 sec
RG         18
DW         56.800 usec
DE         6.50 usec
TE         292.9 K
D1         1.00000000 sec
D10        1
    
```

```

===== CHANNEL f1 =====
NUC1      1H
P1        14.85 usec
PL1       -0.60 dB
PL1W      13.81451130 W
SF01      400.1320007 MHz
SI        32768
SF        400.1300000 MHz
WDW       EM
SSB       0
LB        0.30 Hz
GB        0
PC        1.00
    
```

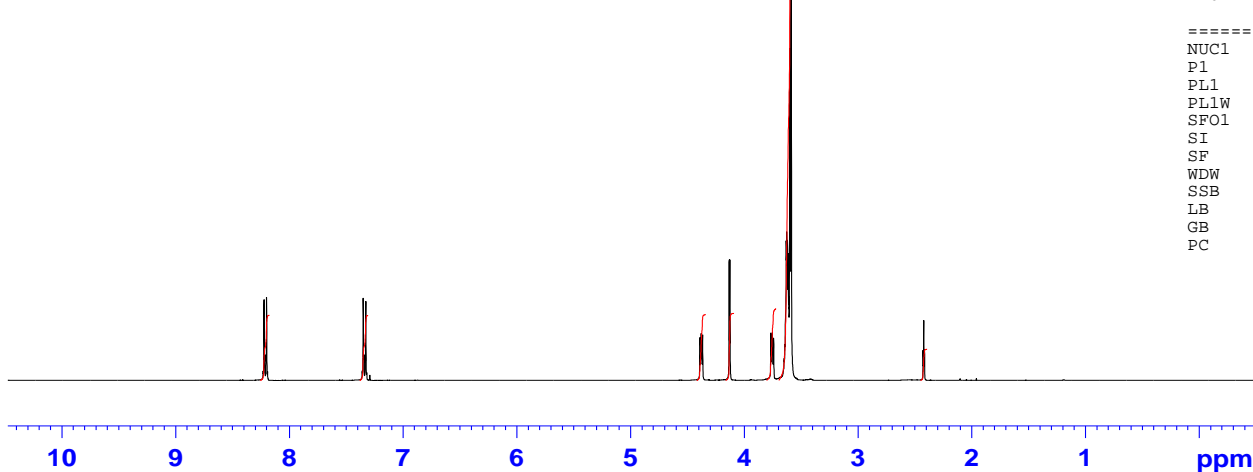

```

NAME      ZH3-136_Alk-P6-PNPC
EXPNO     2
PROCNO    1
Date_     20111026
Time      22.59
INSTRUM   spect
PROBHD    5 mm PABBO BB-
PULPROG   zgpg30
TD         65536
SOLVENT   CDC13
NS         1024
DS         4
SWH        24038.461 Hz
FIDRES     0.366798 Hz
AQ         1.3631988 sec
RG         1030
DW         20.800 usec
DE         6.50 usec
TE         294.6 K
D1         2.00000000 sec
D11        0.03000000 sec
D10        1
    
```

```

===== CHANNEL f1 =====
NUC1      13C
P1        9.99 usec
PL1       -3.00 dB
PL1W      73.67452240 W
SF01      100.6228298 MHz
    
```

```

===== CHANNEL f2 =====
CPDPRG2   waltz16
NUC2      1H
PCPD2     80.00 usec
PL2       -0.65 dB
PL12      13.40 dB
PL13      13.40 dB
PL2W      13.97447491 W
PL12W     0.54996562 W
PL13W     0.54996562 W
SF02      400.1316005 MHz
SI        32768
SF        100.6126885 MHz
WDW       EM
SSB       0
LB        1.00 Hz
GB        0
PC        1.40
    
```

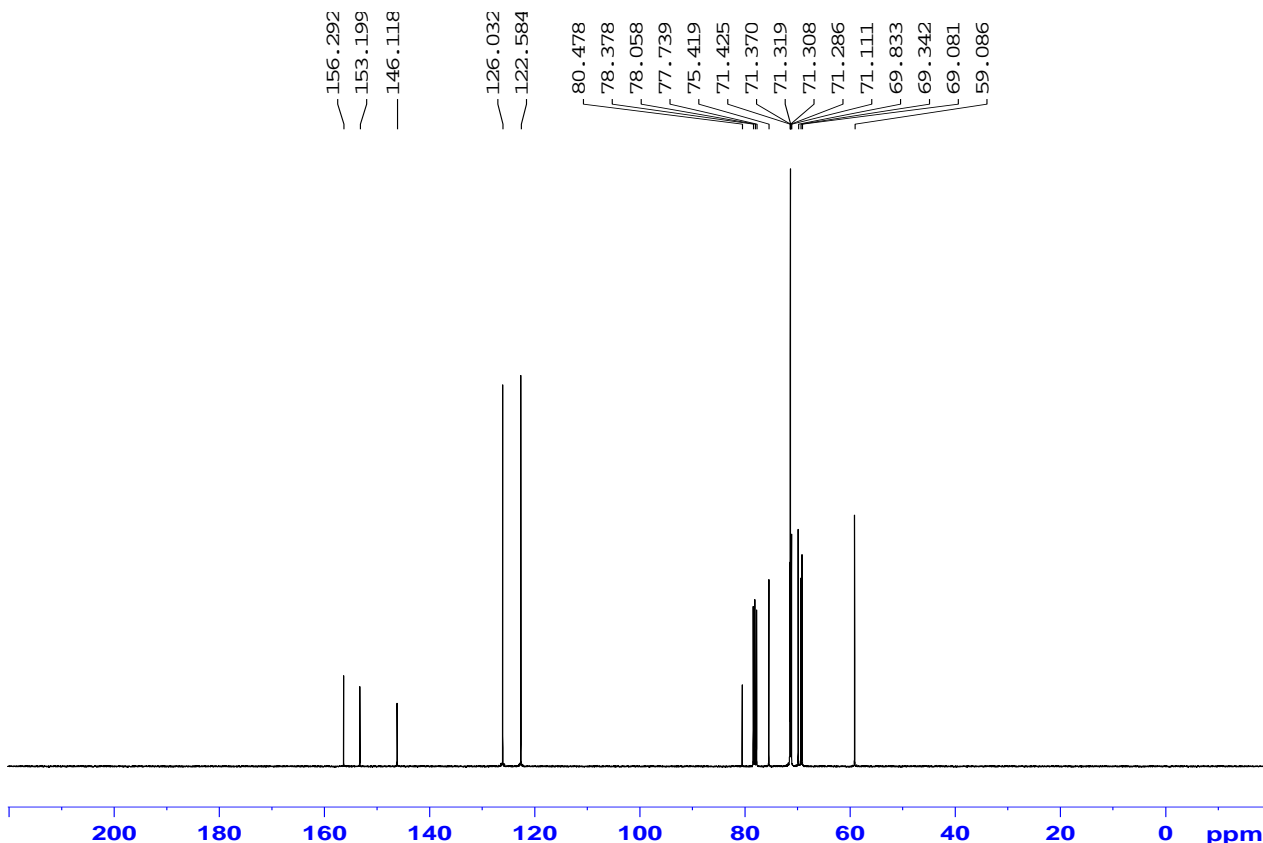

Mariner Spec /1:46 (T/0.00:0.81) ASC[BP = 508.1, 681]

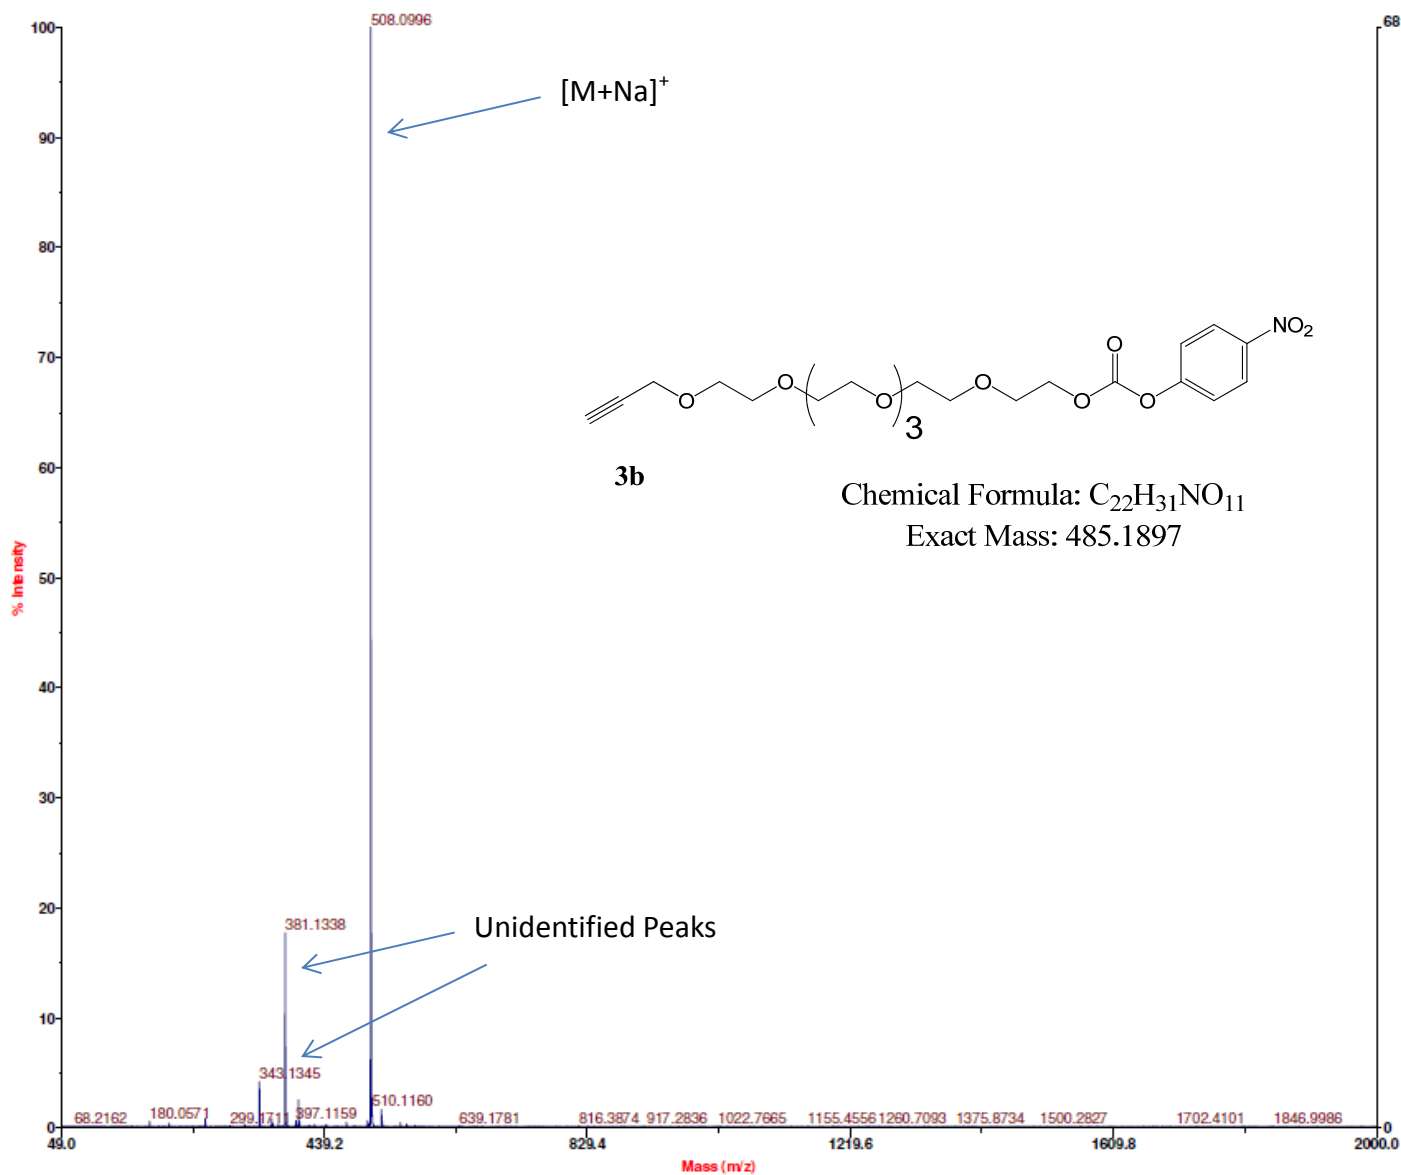

|                                       |                |
|---------------------------------------|----------------|
| --> Mariner System State <--          |                |
| Instrument State                      | ON             |
| Ion Polarity                          | POS            |
| Auxiliary Gas                         | ON             |
| Curtain Gas                           | ON             |
| Nebulizer Gas                         | ON             |
| Calibration Constant A                | 5.0146867E-007 |
| Calibration Constant B                | 77.798312      |
| TDC Deadtime                          | 10             |
| --> Source Settings <--               |                |
| Spray Tip Potential                   | 4509.96        |
| SCIEX Heater                          | 300.05         |
| --> API Interface Settings <--        |                |
| Nozzle Potential                      | 40.04          |
| Skimmer 1 Potential                   | 10.01          |
| Quadrupole DC Potential               | 5.49           |
| Deflection Voltage                    | 0.10           |
| Einzel Lens Potential                 | -24.00         |
| Quadrupole RF Voltage                 | 999.76         |
| Quadrupole Temperature                | 140.01         |
| Nozzle Temperature                    | 140.01         |
| --> Analyzer Settings <--             |                |
| Push Pulse Potential                  | 490.00         |
| Pull Pulse Potential                  | 213.11         |
| Pull Bias Potential                   | 10.00          |
| Acceleration Potential                | 3999.94        |
| Reflector Potential                   | 1549.99        |
| Detector Voltage                      | 1700.24        |
| --> Spectrum Acquisition Settings <-- |                |
| Seconds Per Spectrum                  | 1.00           |
| Ion Count Threshold                   | 0.00           |
| First Mass                            | 50.00          |
| Last Mass                             | 2000.00        |
| Accumulate Spectra                    | OFF            |
| Standby at End of Acquisition         | OFF            |
| --> Centroid Spectra Settings <--     |                |
| Centroid Spectra                      | OFF            |
| --> System Settings <--               |                |
| Gas Control Mode                      | Manual         |
| Syringe Pump Mode                     | Manual         |
| Syringe Pump Rate                     | 50.00          |
| Syringe Diameter                      | 3.26           |
| Min Analyzer Mass                     | 50.00          |
| Max Analyzer Mass                     | 4000.00        |

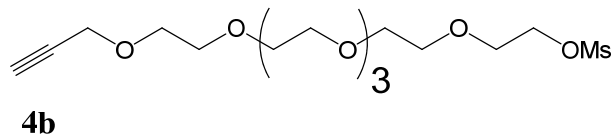

4.388  
4.387  
4.386  
4.303  
4.296  
4.131  
4.125  
3.708  
3.701  
3.696  
3.692  
3.686  
3.634  
3.628  
3.616  
3.610  
3.605  
3.596  
3.591  
3.582  
3.572  
3.565  
3.107  
3.022  
2.430  
2.424  
2.418

```

NAME      ZH3-135_Alk-P6-OMs
EXPNO    1
PROCNO   1
Date_    20111025
Time     21.04
INSTRUM  spect
PROBHD   5 mm PABBO BB-
PULPROG  zg30
TD       65536
SOLVENT  CDCl3
NS       16
DS       2
SWH      8802.817 Hz
FIDRES   0.134320 Hz
AQ       3.7224948 sec
RG       18
DW       56.800 usec
DE       6.50 usec
TE       292.5 K
D1       1.00000000 sec
TD0      1
    
```

```

===== CHANNEL f1 =====
NUC1     1H
P1       14.85 usec
PL1      -0.60 dB
PLLW     13.81451130 W
SFO1     400.1320007 MHz
SI       32768
SF       400.1300000 MHz
WDW      EM
SSB      0
LB       0.30 Hz
GB       0
PC       1.00
    
```

10 9 8 7 6 5 4 3 2 1 ppm

2.01  
2.07  
2.09  
20.53  
3.00  
0.94

80.484  
78.381  
78.062  
77.743  
75.442  
71.339  
71.296  
71.284  
71.219  
71.094  
70.171  
69.831  
69.722  
59.081  
38.429  
32.406

```

NAME      ZH3-135_Alk-P6-OMs
EXPNO    2
PROCNO   1
Date_    20111025
Time     22.05
INSTRUM  spect
PROBHD   5 mm PABBO BB-
PULPROG  zgpg30
TD       65536
SOLVENT  CDCl3
NS       1024
DS       4
SWH      24038.461 Hz
FIDRES   0.366798 Hz
AQ       1.3631988 sec
RG       645
DW       20.800 usec
DE       6.50 usec
TE       294.5 K
D1       2.00000000 sec
D11      0.03000000 sec
TD0      1
    
```

```

===== CHANNEL f1 =====
NUC1     13C
P1       9.99 usec
PL1      -3.00 dB
PLLW     73.67452240 W
SFO1     100.6228298 MHz
    
```

```

===== CHANNEL f2 =====
CPDPRG2  waltz16
NUC2     1H
PCPD2    80.00 usec
PL2      -0.65 dB
PL12     13.40 dB
PL13     13.40 dB
PL2W     13.97447491 W
PL12W    0.54996562 W
PL13W    0.54996562 W
SFO2     400.1316005 MHz
SI       32768
SF       100.6126885 MHz
WDW      EM
SSB      0
LB       1.00 Hz
GB       0
PC       1.40
    
```

200 180 160 140 120 100 80 60 40 20 0 ppm

Applied Biosystems Mariner System 5268

Mariner Spec /1:67 (T/0.00:1.17) ASC[BP = 437.1, 447]

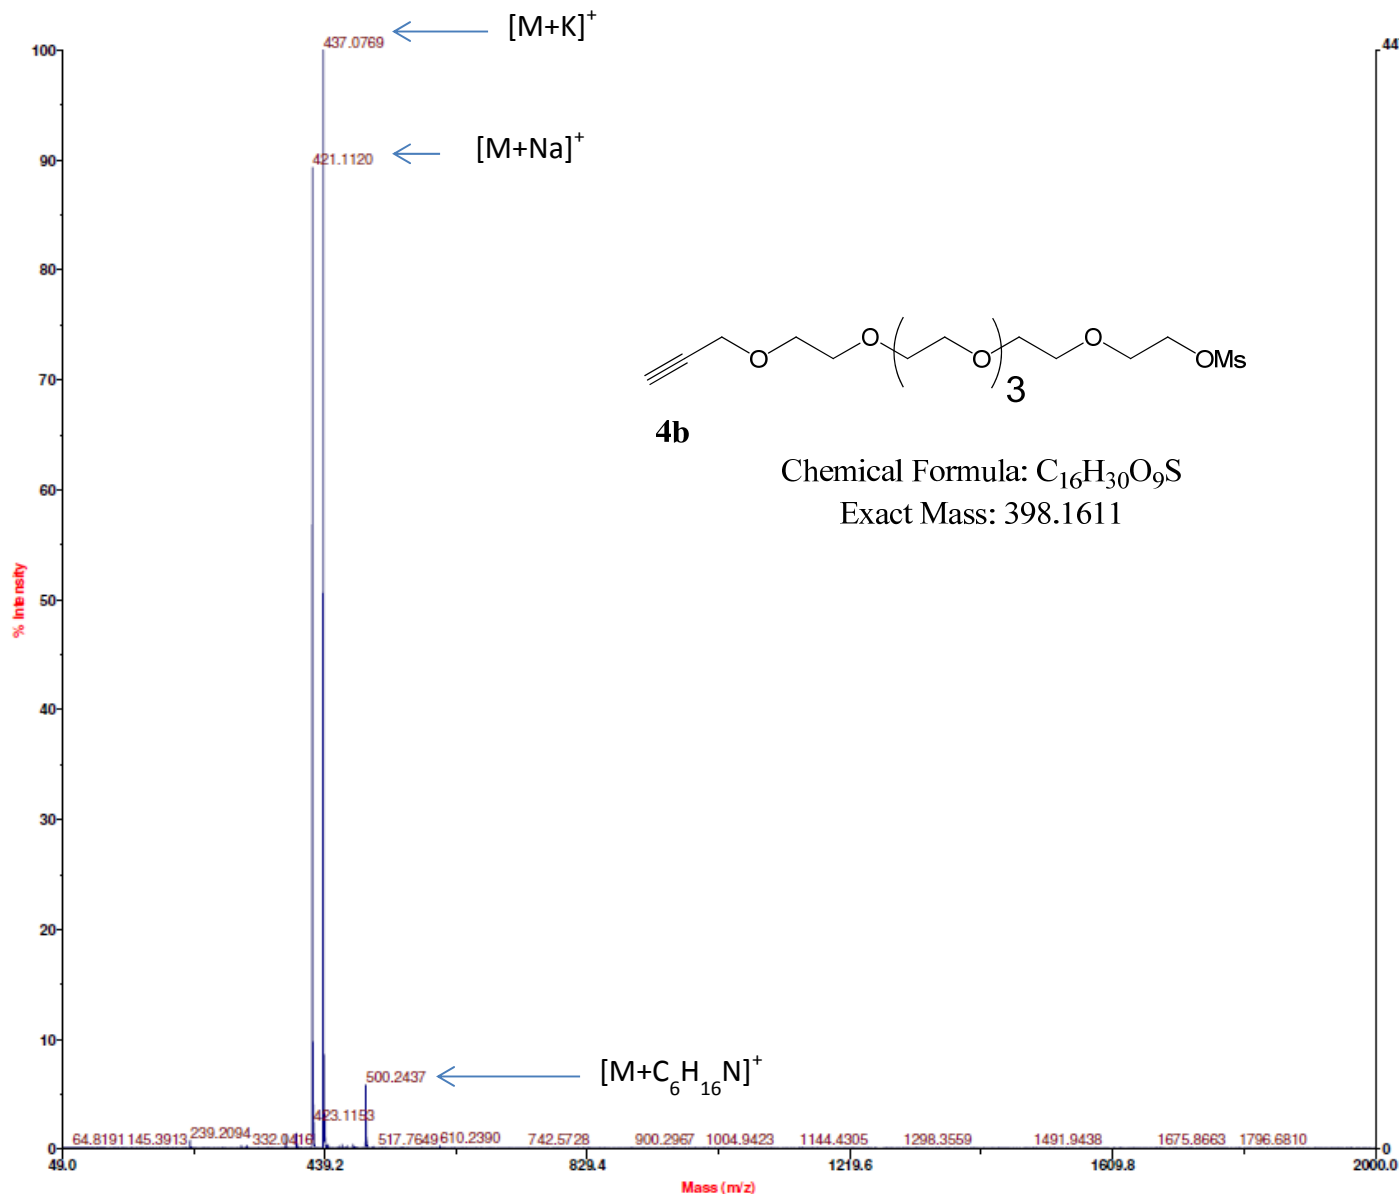

|                                       |                |
|---------------------------------------|----------------|
| --> Mariner System State <--          |                |
| Instrument State                      | ON             |
| Ion Polarity                          | POS            |
| Auxiliary Gas                         | ON             |
| Curtain Gas                           | ON             |
| Nebulizer Gas                         | ON             |
| Calibration Constant A                | 5.0146867E-007 |
| Calibration Constant B                | 77.798312      |
| TDC Deadtime                          | 10             |
| --> Source Settings <--               |                |
| Spray Tip Potential                   | 4509.96        |
| SCIEX Heater                          | 300.05         |
| --> API Interface Settings <--        |                |
| Nozzle Potential                      | 40.04          |
| Skimmer 1 Potential                   | 10.01          |
| Quadrupole DC Potential               | 5.49           |
| Deflection Voltage                    | 0.10           |
| Einzel Lens Potential                 | -24.00         |
| Quadrupole RF Voltage                 | 999.76         |
| Quadrupole Temperature                | 140.01         |
| Nozzle Temperature                    | 140.01         |
| --> Analyzer Settings <--             |                |
| Push Pulse Potential                  | 490.00         |
| Pull Pulse Potential                  | 213.11         |
| Pull Bias Potential                   | 10.00          |
| Acceleration Potential                | 3999.94        |
| Reflector Potential                   | 1549.99        |
| Detector Voltage                      | 1700.24        |
| --> Spectrum Acquisition Settings <-- |                |
| Seconds Per Spectrum                  | 1.00           |
| Ion Count Threshold                   | 0.00           |
| First Mass                            | 50.00          |
| Last Mass                             | 2000.00        |
| Accumulate Spectra                    | OFF            |
| Standby at End of Acquisition         | OFF            |
| --> Centroid Spectra Settings <--     |                |
| Centroid Spectra                      | OFF            |
| --> System Settings <--               |                |
| Gas Control Mode                      | Manual         |
| Syringe Pump Mode                     | Manual         |
| Syringe Pump Rate                     | 50.00          |
| Syringe Diameter                      | 3.26           |
| Min Analyzer Mass                     | 50.00          |
| Max Analyzer Mass                     | 4000.00        |



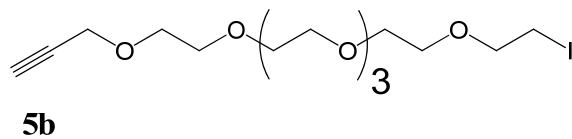

4.134  
4.128  
3.702  
3.685  
3.668  
3.637  
3.630  
3.623  
3.619  
3.613  
3.609  
3.606  
3.601  
3.588  
3.584  
3.211  
3.193  
3.176  
2.425  
2.420  
2.414

```

NAME      ZH3-137_Alk-P6-I
EXPNO    1
PROCNO   1
Date_    20111027
Time     0.03
INSTRUM  spect
PROBHD   5 mm PABBO BB-
PULPROG  zg30
TD       65536
SOLVENT  CDCl3
NS       16
DS       2
SWH      8802.817 Hz
FIDRES   0.134320 Hz
AQ       3.7224948 sec
RG       18
DW       56.800 usec
DE       6.50 usec
TE       292.6 K
D1       1.00000000 sec
TD0      1
    
```

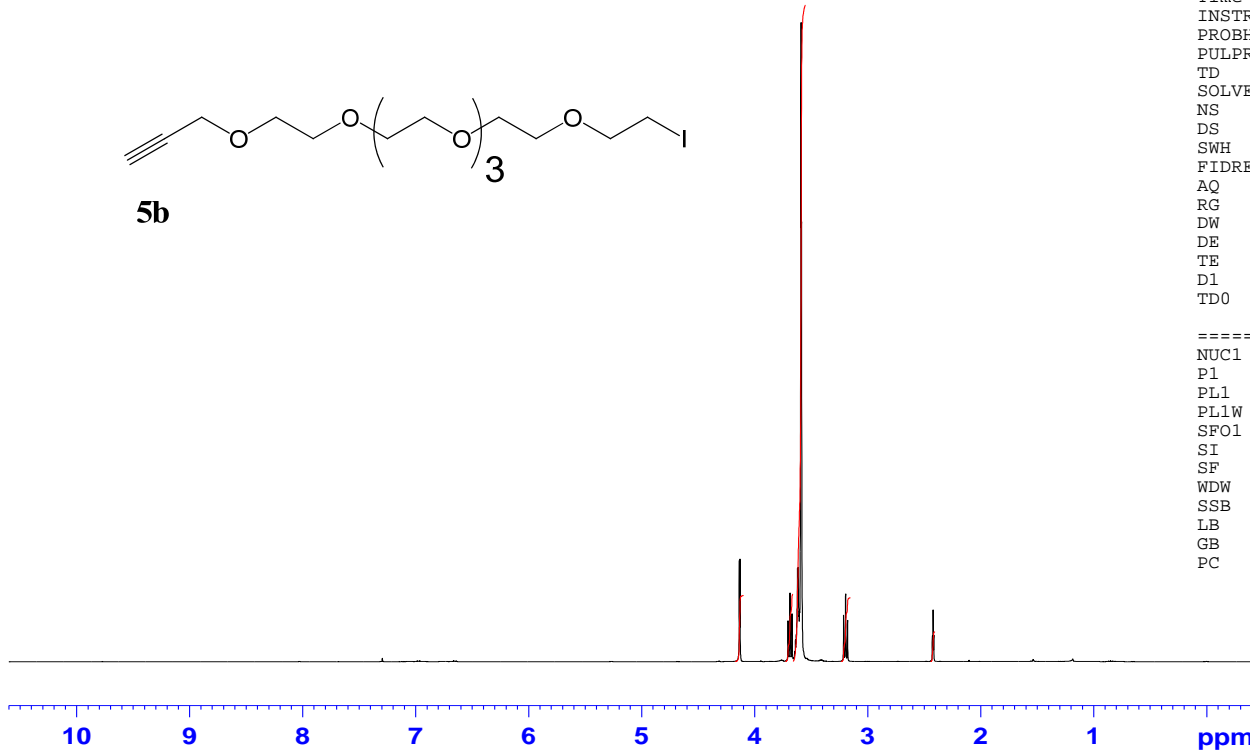

```

===== CHANNEL f1 =====
NUC1     1H
P1       14.85 usec
PL1      -0.60 dB
PL1W    13.81451130 W
SFO1    400.1320007 MHz
SI       32768
SF      400.1300000 MHz
WDW      EM
SSB      0
LB       0.30 Hz
GB       0
PC       1.00
    
```

80.461  
78.394  
78.075  
77.756  
75.460  
72.692  
71.408  
71.331  
71.308  
71.133  
70.959  
69.841  
59.129

— 3.849

```

NAME      ZH3-137_Alk-P6-I
EXPNO    2
PROCNO   1
Date_    20111027
Time     1.04
INSTRUM  spect
PROBHD   5 mm PABBO BB-
PULPROG  zgpg30
TD       65536
SOLVENT  CDCl3
NS       1024
DS       4
SWH      24038.461 Hz
FIDRES   0.366798 Hz
AQ       1.3631988 sec
RG       575
DW       20.800 usec
DE       6.50 usec
TE       294.5 K
D1       2.00000000 sec
D11     0.03000000 sec
TD0      1
    
```

```

===== CHANNEL f1 =====
NUC1     13C
P1       9.99 usec
PL1      -3.00 dB
PL1W    73.67452240 W
SFO1    100.6228298 MHz
    
```

```

===== CHANNEL f2 =====
CPDPRG2  waltz16
NUC2     1H
PCPD2    80.00 usec
PL2      -0.65 dB
PL12    13.40 dB
PL13    13.40 dB
PL2W    13.97447491 W
PL12W   0.54996562 W
PL13W   0.54996562 W
SFO2    400.1316005 MHz
SI       32768
SF      100.6126885 MHz
WDW      EM
SSB      0
LB       1.00 Hz
GB       0
PC       1.40
    
```

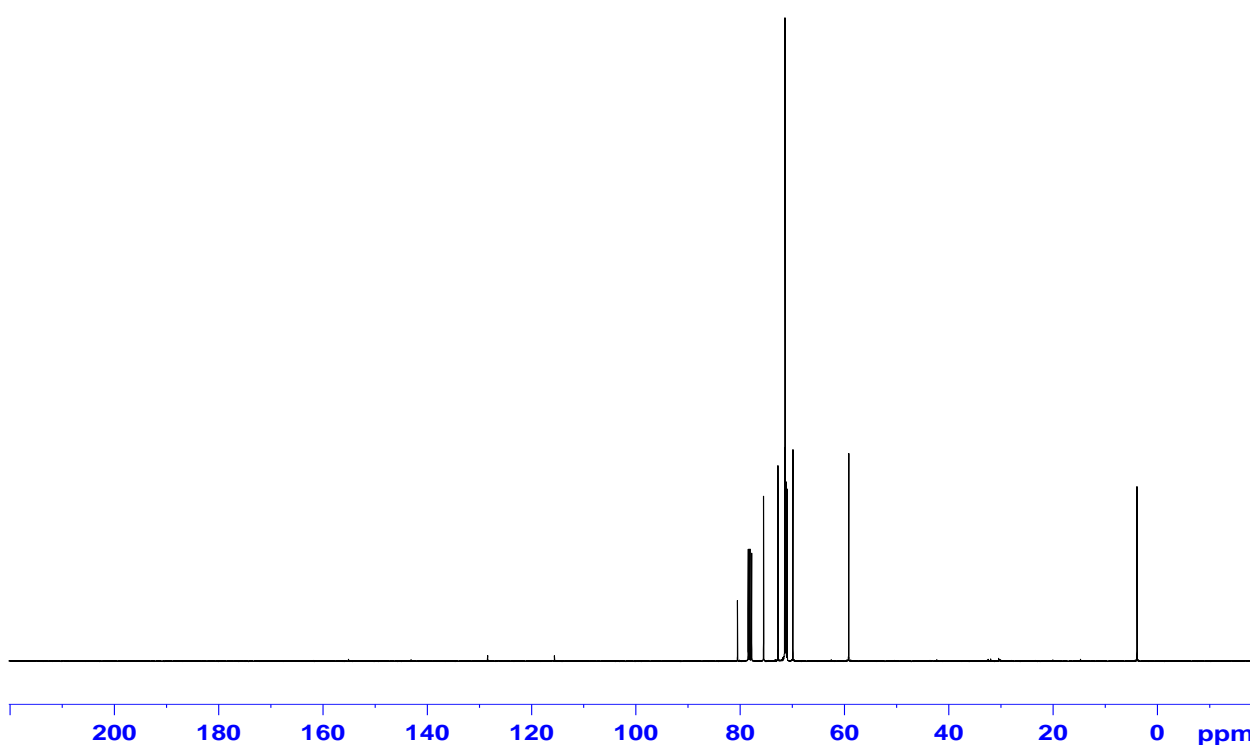

Mariner Spec /1:54 (T/0.00:0.95) ASC[BP = 453.0, 1695]

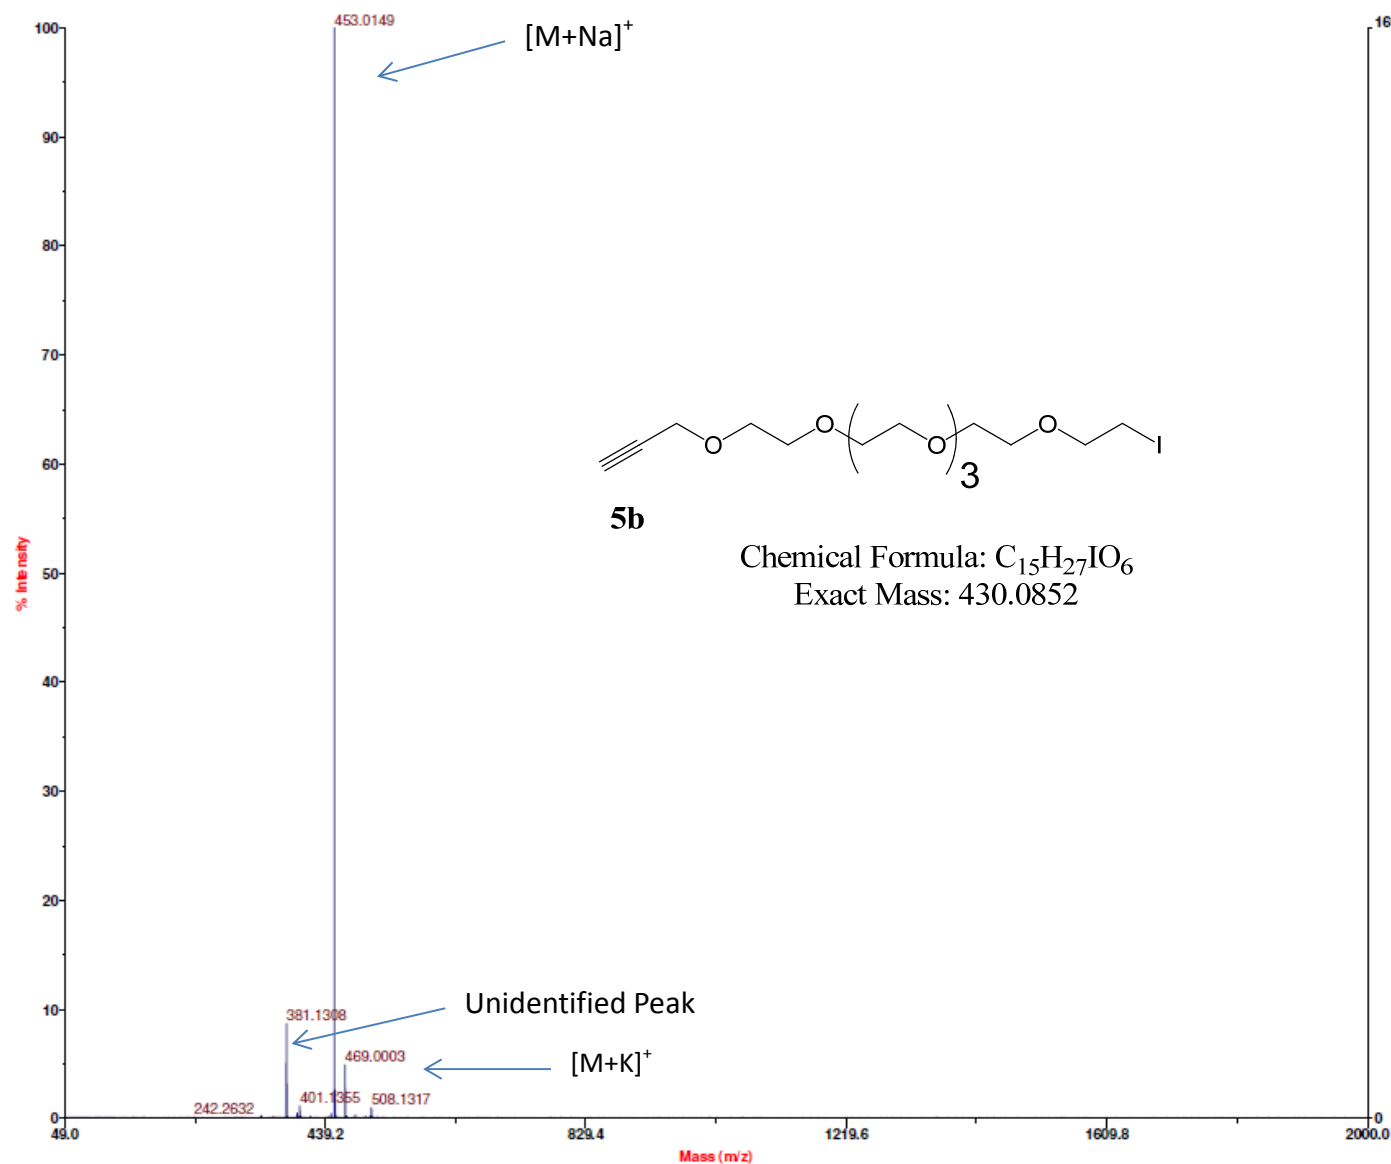

|                                       |                |
|---------------------------------------|----------------|
| --> Mariner System State <--          |                |
| Instrument State                      | ON             |
| Ion Polarity                          | POS            |
| Auxiliary Gas                         | ON             |
| Curtain Gas                           | ON             |
| Nebulizer Gas                         | ON             |
| Calibration Constant A                | 5.0146867E-007 |
| Calibration Constant B                | 77.798312      |
| TDC Deadtime                          | 10             |
| --> Source Settings <--               |                |
| Spray Tip Potential                   | 4509.96        |
| SCIEX Heater                          | 300.05         |
| --> API Interface Settings <--        |                |
| Nozzle Potential                      | 149.90         |
| Skimmer 1 Potential                   | 10.01          |
| Quadrupole DC Potential               | 5.49           |
| Deflection Voltage                    | 0.10           |
| Einzel Lens Potential                 | -24.00         |
| Quadrupole RF Voltage                 | 999.76         |
| Quadrupole Temperature                | 140.01         |
| Nozzle Temperature                    | 140.01         |
| --> Analyzer Settings <--             |                |
| Push Pulse Potential                  | 490.00         |
| Pull Pulse Potential                  | 213.11         |
| Pull Bias Potential                   | 10.00          |
| Acceleration Potential                | 3999.94        |
| Reflector Potential                   | 1549.99        |
| Detector Voltage                      | 1700.24        |
| --> Spectrum Acquisition Settings <-- |                |
| Seconds Per Spectrum                  | 1.00           |
| Ion Count Threshold                   | 0.00           |
| First Mass                            | 50.00          |
| Last Mass                             | 2000.00        |
| Accumulate Spectra                    | OFF            |
| Standby at End of Acquisition         | OFF            |
| --> Centroid Spectra Settings <--     |                |
| Centroid Spectra                      | OFF            |
| --> System Settings <--               |                |
| Gas Control Mode                      | Manual         |
| Syringe Pump Mode                     | Manual         |
| Syringe Pump Rate                     | 50.00          |
| Syringe Diameter                      | 3.26           |
| Min Analyzer Mass                     | 50.00          |
| Max Analyzer Mass                     | 4000.00        |

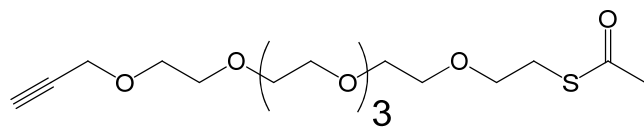

**6b**

```

NAME      LG-816_Alkyne-P6-Sac
EXPNO     1
PROCNO    1
Date_     20111027
Time      15.11
INSTRUM   spect
PROBHD    5 mm PABBO BB-
PULPROG   zg30
TD        65536
SOLVENT   CDCl3
NS        16
DS        2
SWH       8802.817 Hz
FIDRES    0.134320 Hz
AQ        3.7224948 sec
RG        14.2
DW        56.800 usec
DE        6.50 usec
TE        292.4 K
D1        1.00000000 sec
TD0       1
    
```

```

===== CHANNEL f1 =====
NUC1      1H
P1        14.85 usec
PL1       -0.60 dB
PL1W      13.81451130 W
SFO1      400.1320007 MHz
SI        32768
SF        400.1300000 MHz
WDW       EM
SSB       0
LB        0.30 Hz
GB        0
PC        1.00
    
```

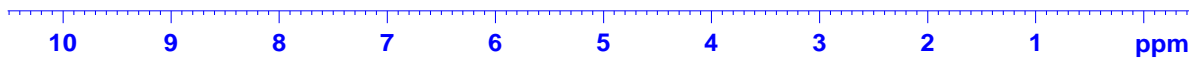

```

NAME      LG-816_Alkyne-P6-Sac
EXPNO     2
PROCNO    1
Date_     20111027
Time      15.41
INSTRUM   spect
PROBHD    5 mm PABBO BB-
PULPROG   zgpg30
TD        65536
SOLVENT   CDCl3
NS        512
DS        4
SWH       24038.461 Hz
FIDRES    0.366798 Hz
AQ        1.3631988 sec
RG        724
DW        20.800 usec
DE        6.50 usec
TE        294.5 K
D1        2.00000000 sec
D11       0.03000000 sec
TD0       1
    
```

```

===== CHANNEL f1 =====
NUC1      13C
P1        9.99 usec
PL1       -3.00 dB
PL1W      73.67452240 W
SFO1      100.6228298 MHz
    
```

```

===== CHANNEL f2 =====
CPDPRG2   waltz16
NUC2      1H
PCPD2     80.00 usec
PL2       -0.65 dB
PL12      13.40 dB
PL13      13.40 dB
PL2W      13.97447491 W
PL12W     0.54996562 W
PL13W     0.54996562 W
SFO2      400.1316005 MHz
SI        32768
SF        100.6126885 MHz
WDW       EM
SSB       0
LB        1.00 Hz
GB        0
PC        1.40
    
```

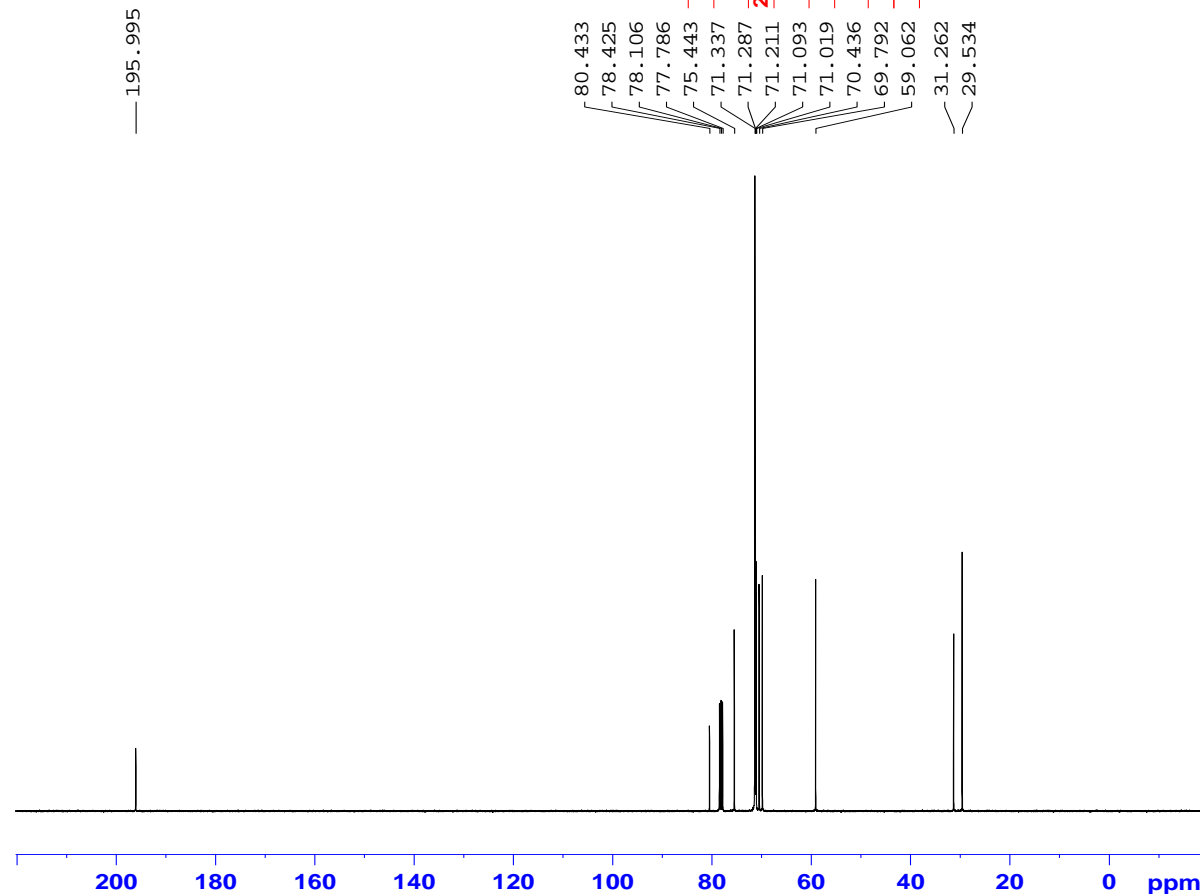

Applied Biosystems Mariner System 5268

Mariner Spec /1:29 (T/0.00:0.50) ASC[BP = 401.1, 670]

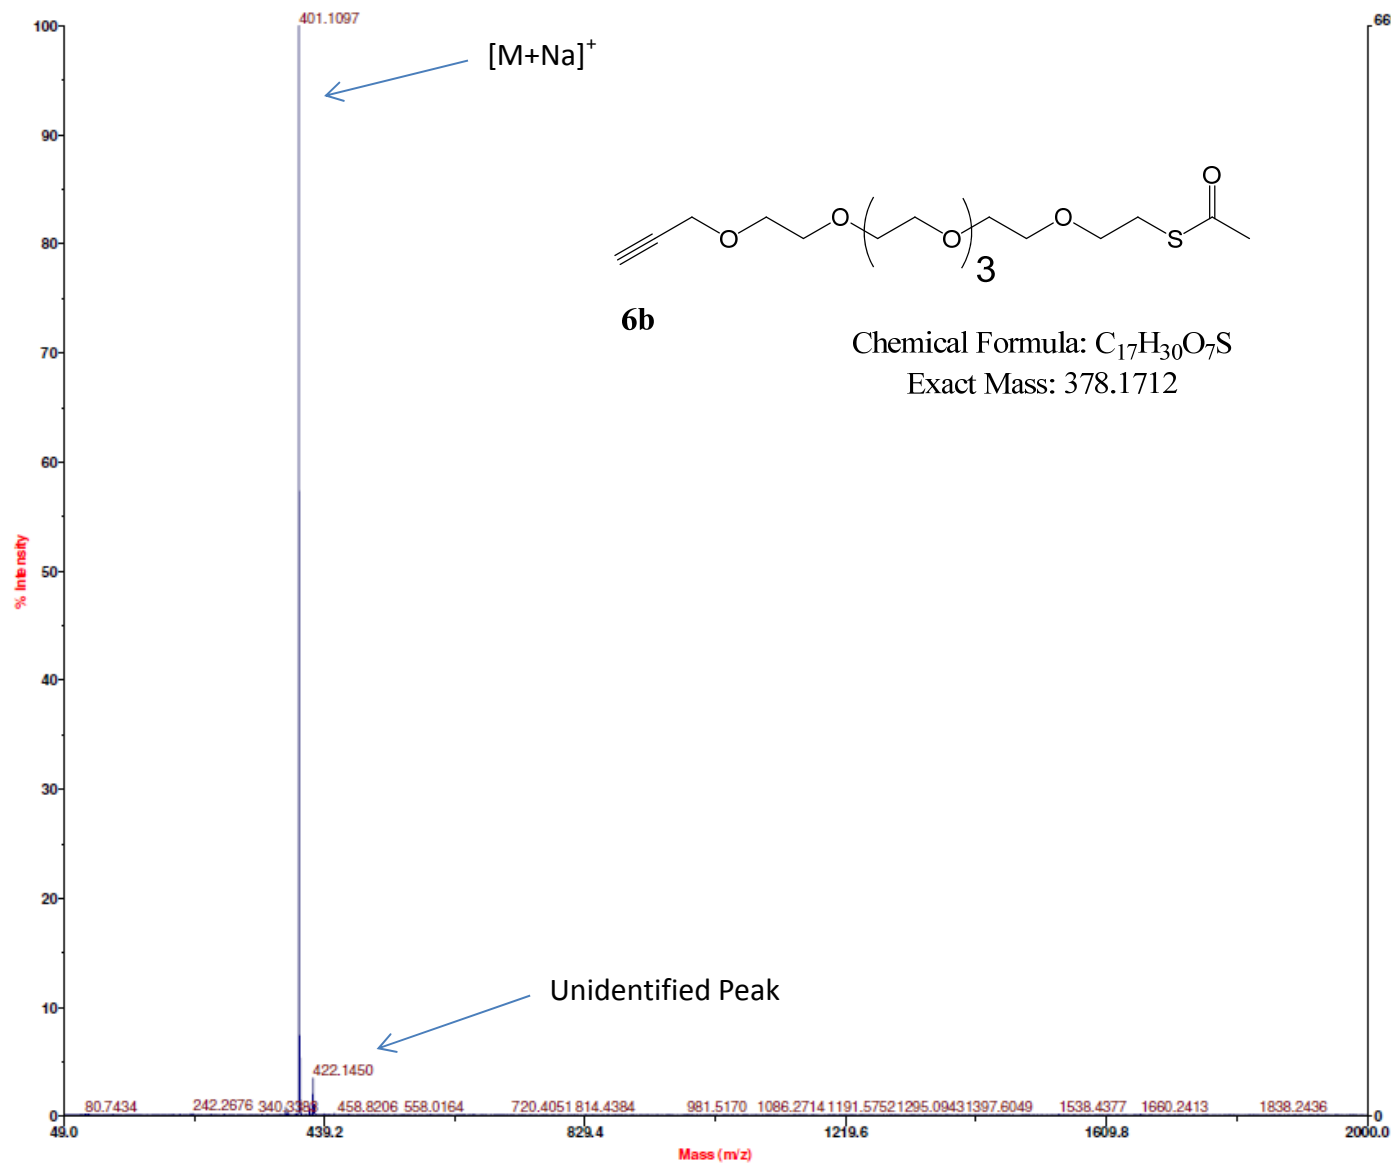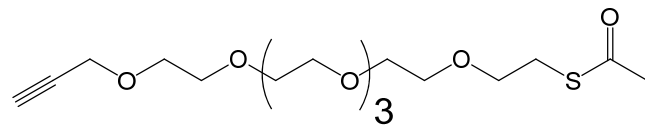

```

--> Mariner System State <--
Instrument State      ON
Ion Polarity         POS
Auxiliary Gas        ON
Curtain Gas          ON
Nebulizer Gas        ON
Calibration Constant A  5.0146867E-007
Calibration Constant B  77.798312
TDC Deadtime         10
--> Source Settings <--
Spray Tip Potential   4509.96
SCIEX Heater         300.05
--> API Interface Settings <--
Nozzle Potential      40.04
Skimmer 1 Potential   10.01
Quadrupole DC Potential  5.49
Deflection Voltage    0.10
Einzel Lens Potential -24.00
Quadrupole RF Voltage  999.76
Quadrupole Temperature 140.01
Nozzle Temperature   140.01
--> Analyzer Settings <--
Push Pulse Potential  490.00
Pull Pulse Potential  213.11
Pull Bias Potential   10.00
Acceleration Potential 3999.94
Reflector Potential   1549.99
Detector Voltage      1700.24
--> Spectrum Acquisition Settings <--
Seconds Per Spectrum  1.00
Ion Count Threshold   0.00
First Mass            50.00
Last Mass             2000.00
Accumulate Spectra    OFF
Standby at End of Acquisition OFF
--> Centroid Spectra Settings <--
Centroid Spectra      OFF
--> System Settings <--
Gas Control Mode      Manual
Syringe Pump Mode     Manual
Syringe Pump Rate     50.00
Syringe Diameter      3.26
Min Analyzer Mass     50.00
Max Analyzer Mass     4000.00
    
```

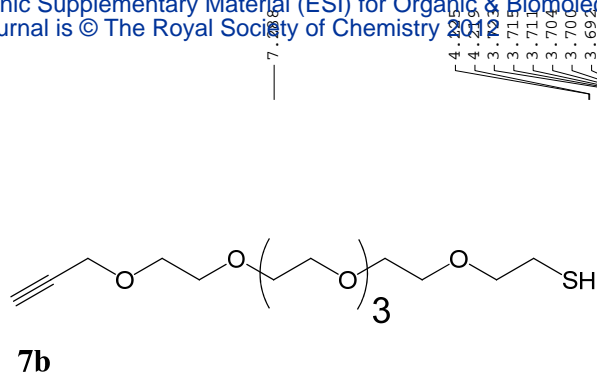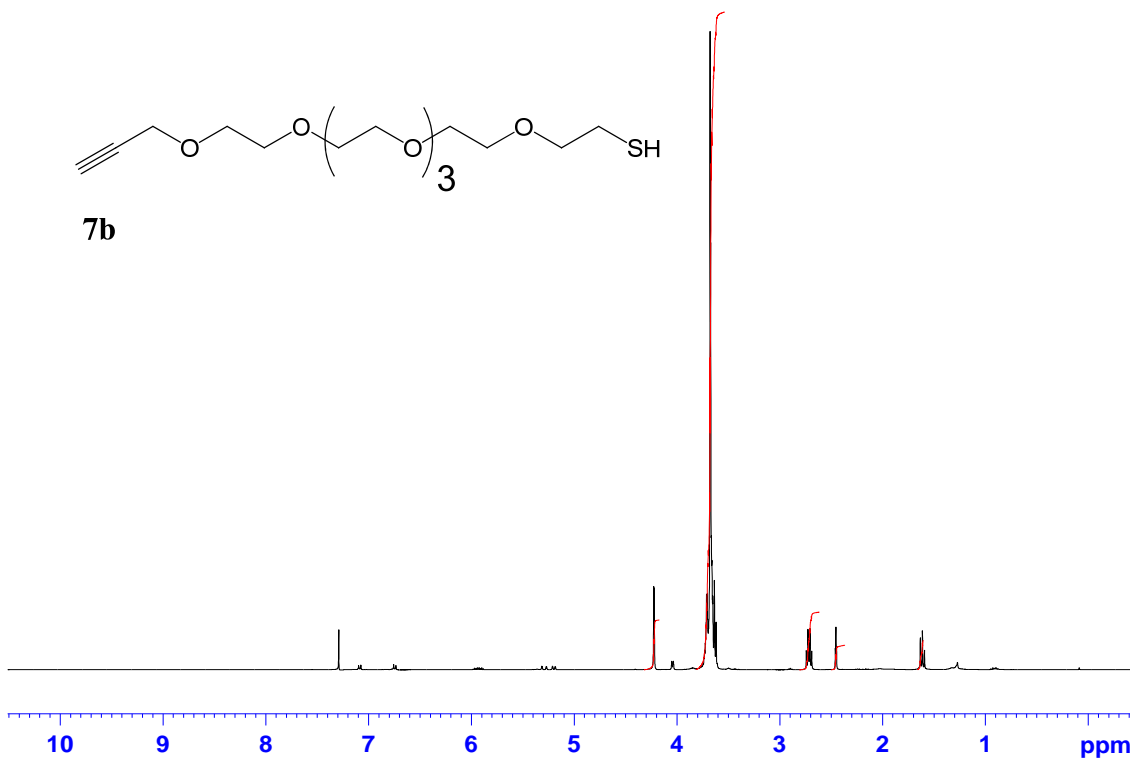

```

NAME      LG-819_Alkyne-P6-SH
EXPNO     1
PROCNO    1
Date_     20111031
Time      19.52
INSTRUM   spect
PROBHD    5 mm PABBO BB-
PULPROG   zg30
TD         65536
SOLVENT   CDC13
NS         64
DS         2
SWH       8802.817 Hz
FIDRES    0.134320 Hz
AQ         3.7224948 sec
RG         128
DW         56.800 usec
DE         6.50 usec
TE         292.5 K
D1         1.00000000 sec
TDO        1
    
```

```

===== CHANNEL f1 =====
NUC1      1H
P1         14.85 usec
PL1       -0.60 dB
PL1W      13.81451130 W
SFO1      400.1320007 MHz
SI         32768
SF         400.1300000 MHz
WDW        EM
SSB        0
LB         0.30 Hz
GB         0
PC         1.00
    
```

135.589  
128.600  
117.882  
115.548  
80.487  
78.158  
78.043  
77.840  
77.522  
75.315  
73.706  
73.046  
71.468  
71.421  
71.395  
71.358  
71.227  
71.060  
70.248  
69.936  
59.223  
25.082

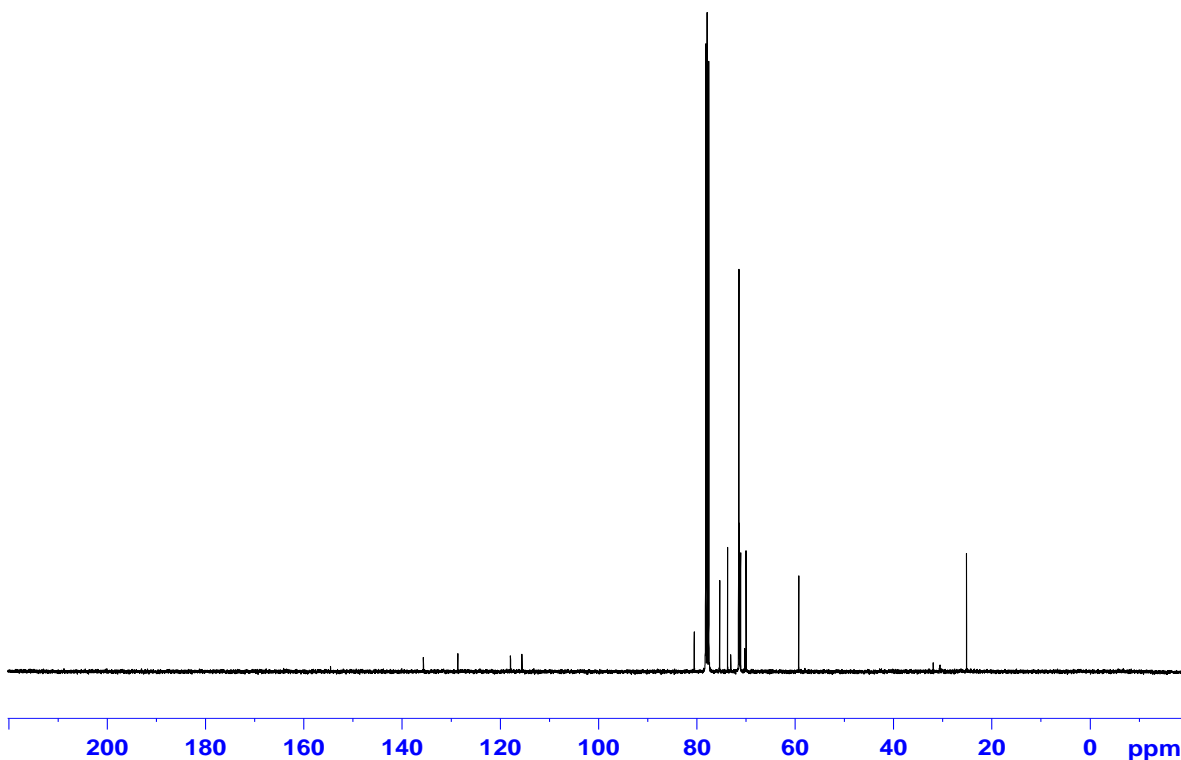

```

NAME      LG-819_Alkyne-P6-SH
EXPNO     2
PROCNO    1
Date_     20111031
Time      21.48
INSTRUM   spect
PROBHD    5 mm PABBO BB-
PULPROG   zgpg30
TD         65536
SOLVENT   CDC13
NS         2000
DS         4
SWH       24038.461 Hz
FIDRES    0.366798 Hz
AQ         1.3631988 sec
RG         645
DW         20.800 usec
DE         6.50 usec
TE         294.6 K
D1         2.00000000 sec
D11        0.03000000 sec
TDO        1
    
```

```

===== CHANNEL f1 =====
NUC1      13C
P1         9.99 usec
PL1       -3.00 dB
PL1W      73.67452240 W
SFO1      100.6228298 MHz
    
```

```

===== CHANNEL f2 =====
CPDPRG2   waltz16
NUC2      1H
PCPD2     80.00 usec
PL2       -0.65 dB
PL12      13.40 dB
PL13      13.40 dB
PL2W      13.97447491 W
PL12W     0.54996562 W
PL13W     0.54996562 W
SFO2      400.1316005 MHz
SI         32768
SF         100.6126885 MHz
WDW        EM
SSB        0
LB         1.00 Hz
GB         0
PC         1.40
    
```

Mariner Spec /1:35 (T/0.00:0.61) ASC[BP = 359.2, 455]

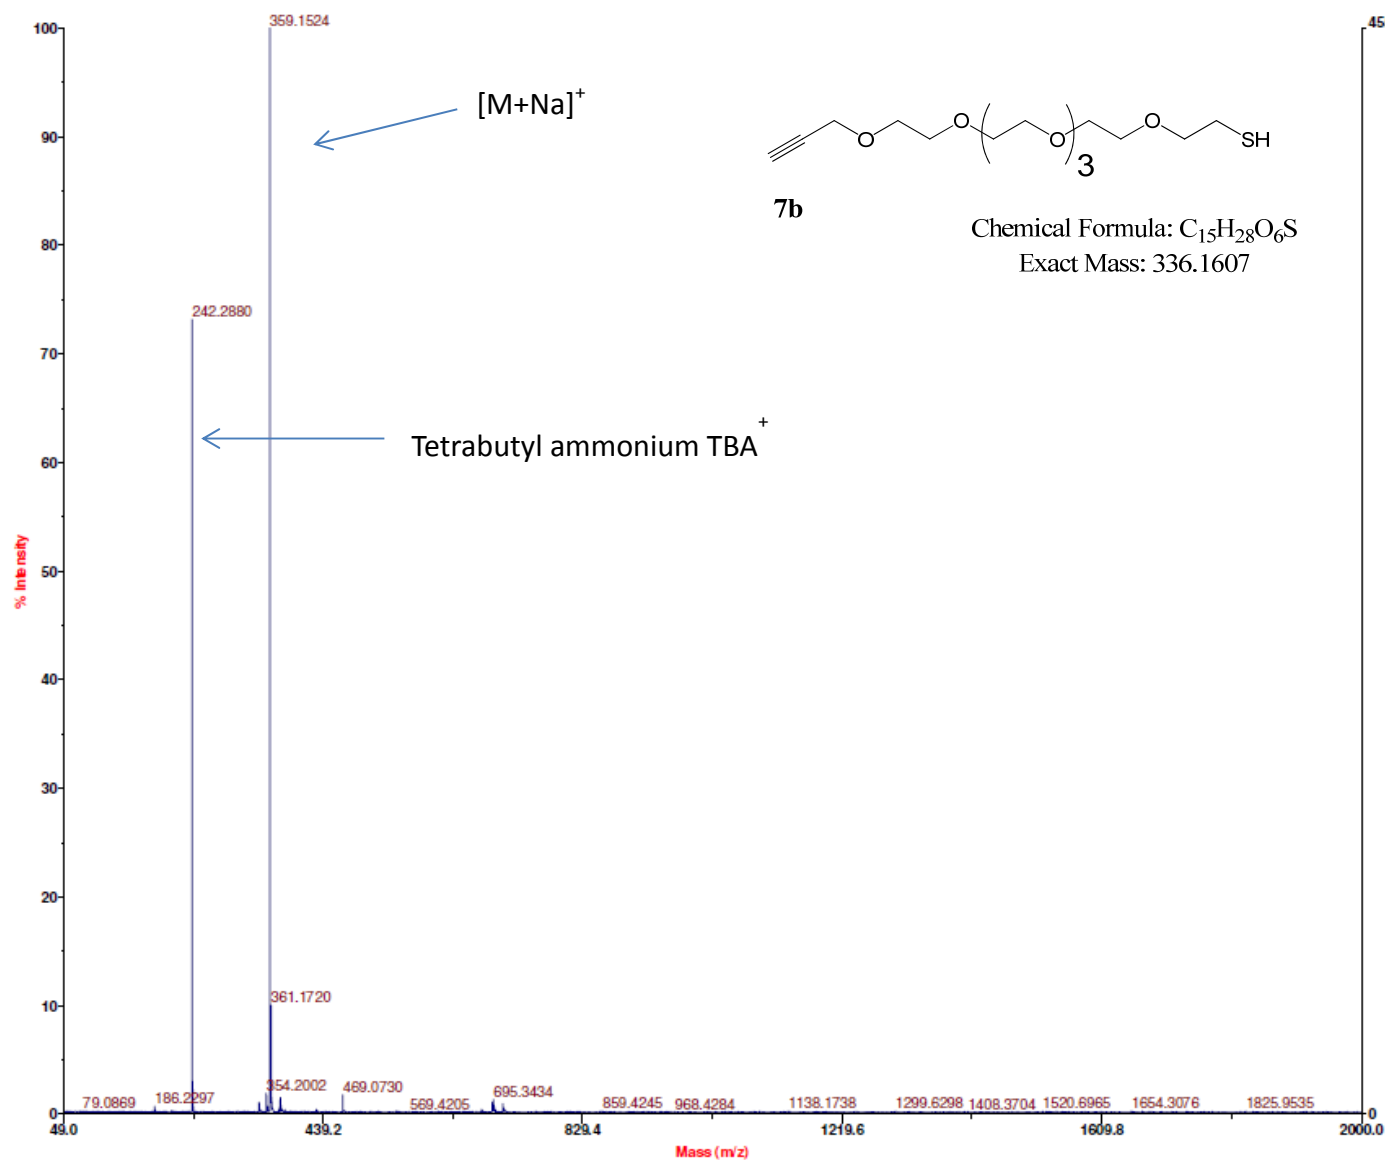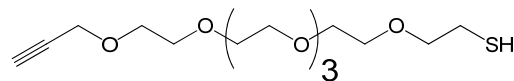

Chemical Formula: C<sub>15</sub>H<sub>28</sub>O<sub>6</sub>S  
Exact Mass: 336.1607

--> Mariner System State <--  
Instrument State ON  
Ion Polarity POS  
Auxiliary Gas ON  
Curtain Gas ON  
Nebulizer Gas ON  
Calibration Constant A 5.0146867E-007  
Calibration Constant B 77.798312  
TDC Deadtime 10  
--> Source Settings <--  
Spray Tip Potential 4509.96  
SCIEX Heater 300.05  
--> API Interface Settings <--  
Nozzle Potential 40.04  
Skimmer 1 Potential 10.01  
Quadrupole DC Potential 5.49  
Deflection Voltage 0.10  
Einzel Lens Potential -24.00  
Quadrupole RF Voltage 999.76  
Quadrupole Temperature 140.01  
Nozzle Temperature 140.01  
--> Analyzer Settings <--  
Push Pulse Potential 490.00  
Pull Pulse Potential 213.11  
Pull Bias Potential 10.00  
Acceleration Potential 3999.94  
Reflector Potential 1549.99  
Detector Voltage 1700.24  
--> Spectrum Acquisition Settings <--  
Seconds Per Spectrum 1.00  
Ion Count Threshold 0.00  
First Mass 50.00  
Last Mass 2000.00  
Accumulate Spectra OFF  
Standby at End of Acquisition OFF  
--> Centroid Spectra Settings <--  
Centroid Spectra OFF  
--> System Settings <--  
Gas Control Mode Manual  
Syringe Pump Mode Manual  
Syringe Pump Rate 50.00  
Syringe Diameter 3.26  
Min Analyzer Mass 50.00  
Max Analyzer Mass 4000.00

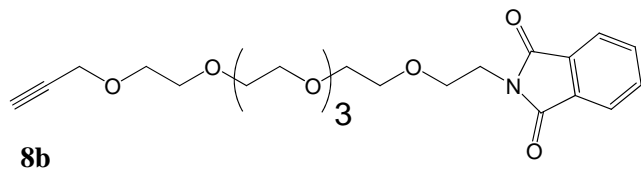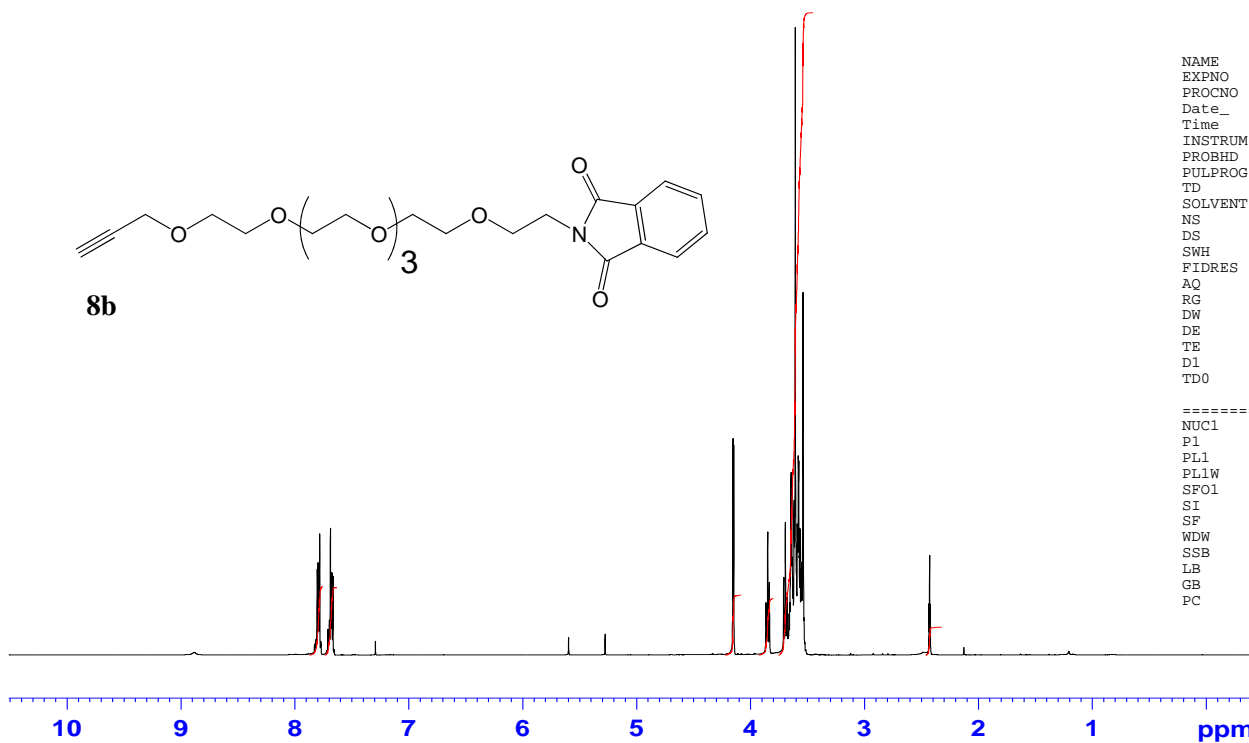

```

NAME      LG-814M_Alkyne-P6-NPth
EXPNO    1
PROCNO   1
Date_    20111027
Time     3.12
INSTRUM  spect
PROBHD   5 mm PABBO BB-
PULPROG  zg30
TD       65536
SOLVENT  CDCl3
NS       16
DS       2
SWH      8802.817 Hz
FIDRES   0.134320 Hz
AQ       3.7224948 sec
RG       22.6
DW       56.800 usec
DE       6.50 usec
TE       292.6 K
D1       1.00000000 sec
TD0      1
    
```

```

===== CHANNEL f1 =====
NUC1     1H
P1       14.85 usec
PL1      -0.60 dB
PL1W     13.81451130 W
SFO1     400.1320007 MHz
SI       32768
SF       400.1300000 MHz
WDW      EM
SSB      0
LB       0.30 Hz
GB       0
PC       1.00
    
```

169.160  
 168.964  
 167.544  
 135.153  
 134.843  
 134.697  
 133.620  
 132.882  
 132.424  
 124.477  
 124.114  
 123.966  
 80.466  
 78.308  
 78.189  
 77.989  
 77.670  
 75.396  
 73.339  
 71.341  
 71.298  
 71.278  
 71.131  
 71.065  
 70.844  
 69.853  
 68.636  
 62.413  
 59.118  
 38.030

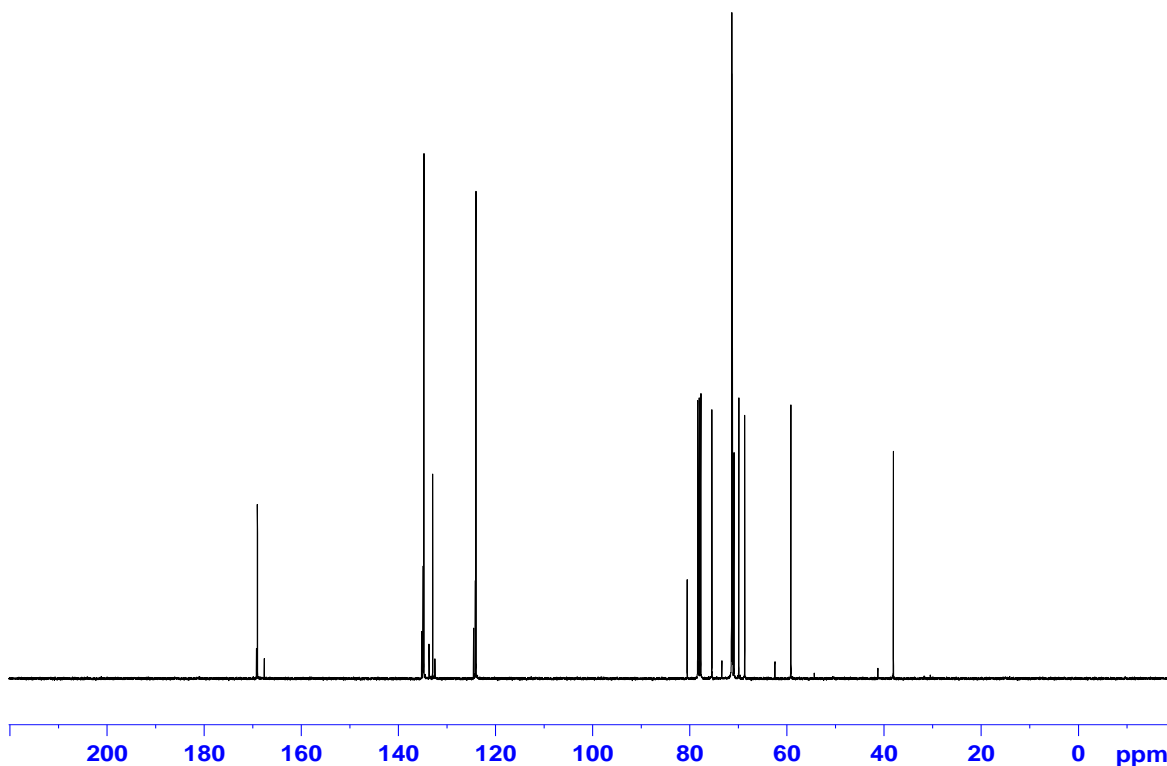

```

NAME      LG-814M_Alkyne-P6-NPth
EXPNO    2
PROCNO   1
Date_    20111027
Time     4.12
INSTRUM  spect
PROBHD   5 mm PABBO BB-
PULPROG  zgpg30
TD       65536
SOLVENT  CDCl3
NS       1024
DS       4
SWH      24038.461 Hz
FIDRES   0.366798 Hz
AQ       1.3631988 sec
RG       575
DW       20.800 usec
DE       6.50 usec
TE       294.5 K
D1       2.00000000 sec
D11      0.03000000 sec
TD0      1
    
```

```

===== CHANNEL f1 =====
NUC1     13C
P1       9.99 usec
PL1      -3.00 dB
PL1W     73.67452240 W
SFO1     100.6228298 MHz
    
```

```

===== CHANNEL f2 =====
CPDPRG2  waltz16
NUC2     1H
PCPD2    80.00 usec
PL2      -0.65 dB
PL12     13.40 dB
PL13     13.40 dB
PL2W     13.97447491 W
PL12W    0.54996562 W
PL13W    0.54996562 W
SFO2     400.1316005 MHz
SI       32768
SF       100.6126885 MHz
WDW      EM
SSB      0
LB       1.00 Hz
GB       0
PC       1.40
    
```

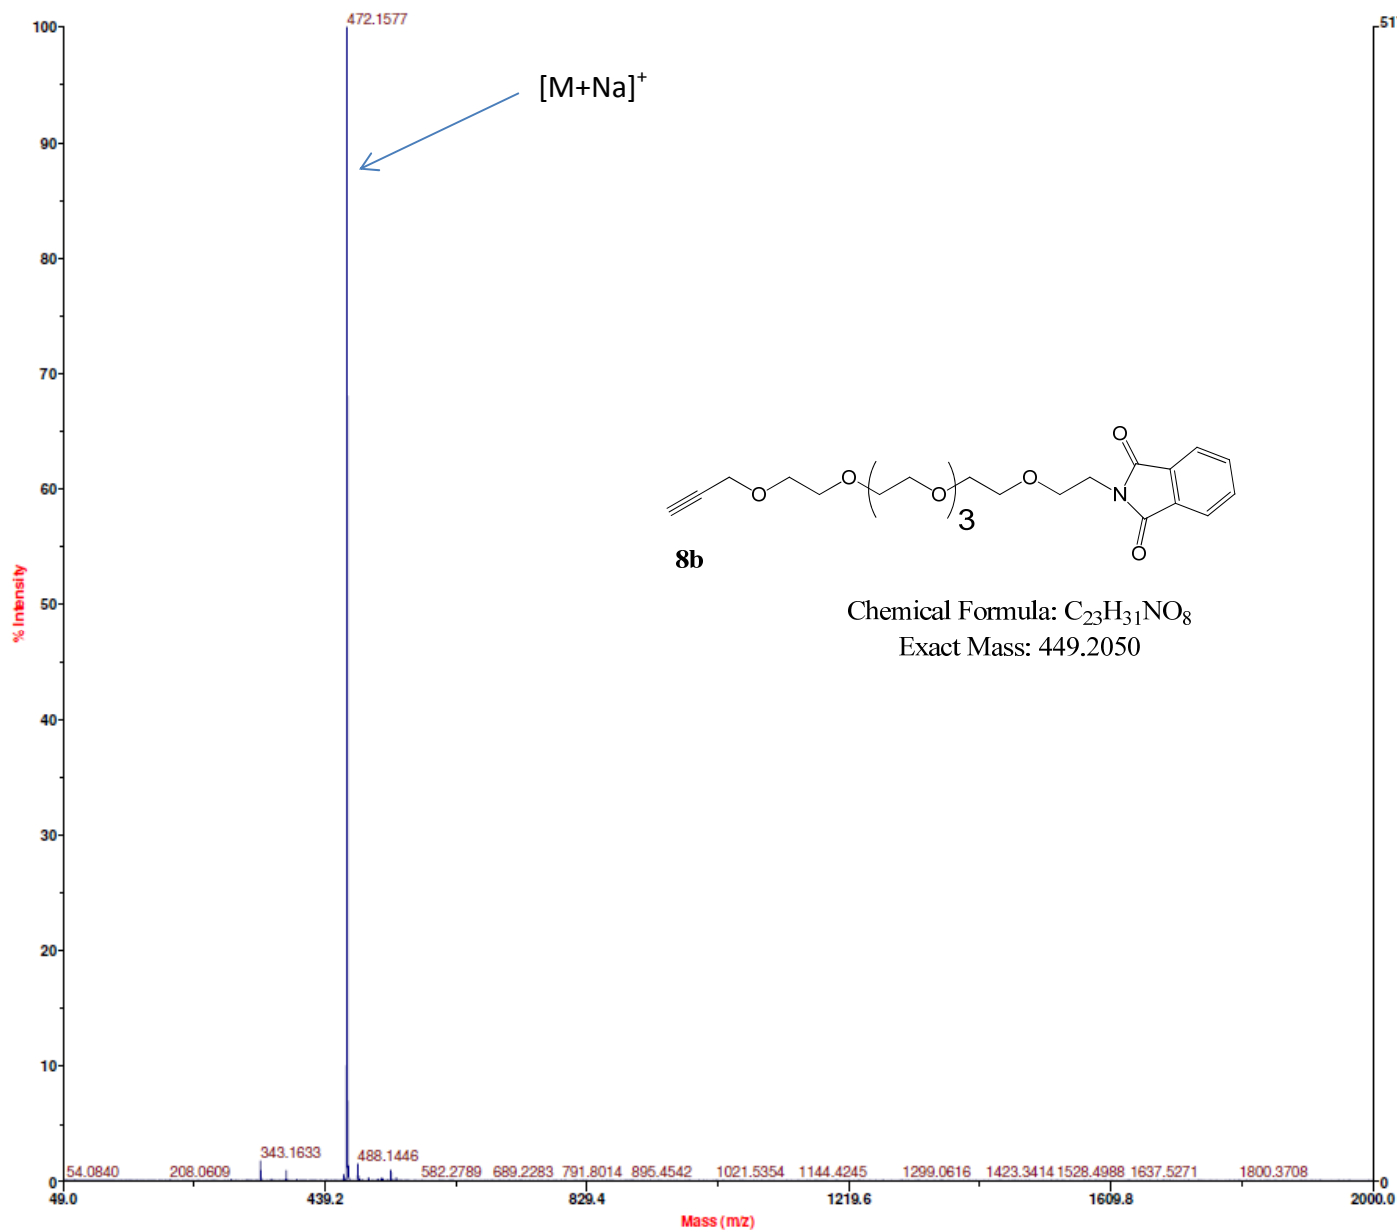

|                                       |                |
|---------------------------------------|----------------|
| Instrument State                      | ON             |
| Ion Polarity                          | POS            |
| Auxiliary Gas                         | ON             |
| Curtain Gas                           | ON             |
| Nebulizer Gas                         | ON             |
| Calibration Constant A                | 5.0146867E-007 |
| Calibration Constant B                | 77.798312      |
| TDC Deadtime                          | 10             |
| --> Source Settings <--               |                |
| Spray Tip Potential                   | 4509.96        |
| SCIE X Heater                         | 300.05         |
| --> API Interface Settings <--        |                |
| Nozzle Potential                      | 40.04          |
| Skimmer 1 Potential                   | 10.01          |
| Quadrupole DC Potential               | 5.49           |
| Deflection Voltage                    | 0.10           |
| Einzel Lens Potential                 | -24.00         |
| Quadrupole RF Voltage                 | 999.76         |
| Quadrupole Temperature                | 140.01         |
| Nozzle Temperature                    | 140.01         |
| --> Analyzer Settings <--             |                |
| Push Pulse Potential                  | 490.00         |
| Pull Pulse Potential                  | 213.11         |
| Pull Bias Potential                   | 10.00          |
| Acceleration Potential                | 3999.94        |
| Reflector Potential                   | 1549.99        |
| Detector Voltage                      | 1700.24        |
| --> Spectrum Acquisition Settings <-- |                |
| Seconds Per Spectrum                  | 1.00           |
| Ion Count Threshold                   | 0.00           |
| First Mass                            | 50.00          |
| Last Mass                             | 2000.00        |
| Accumulate Spectra                    | OFF            |
| Standby at End of Acquisition         | OFF            |
| --> Centroid Spectra Settings <--     |                |
| Centroid Spectra                      | OFF            |
| --> System Settings <--               |                |
| Gas Control Mode                      | Manual         |
| Syringe Pump Mode                     | Manual         |
| Syringe Pump Rate                     | 50.00          |
| Syringe Diameter                      | 3.26           |
| Min Analyzer Mass                     | 50.00          |
| Max Analyzer Mass                     | 4000.00        |



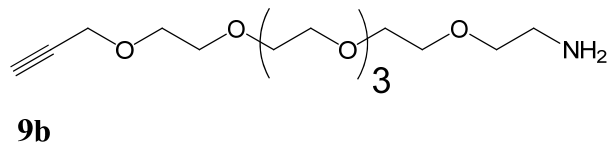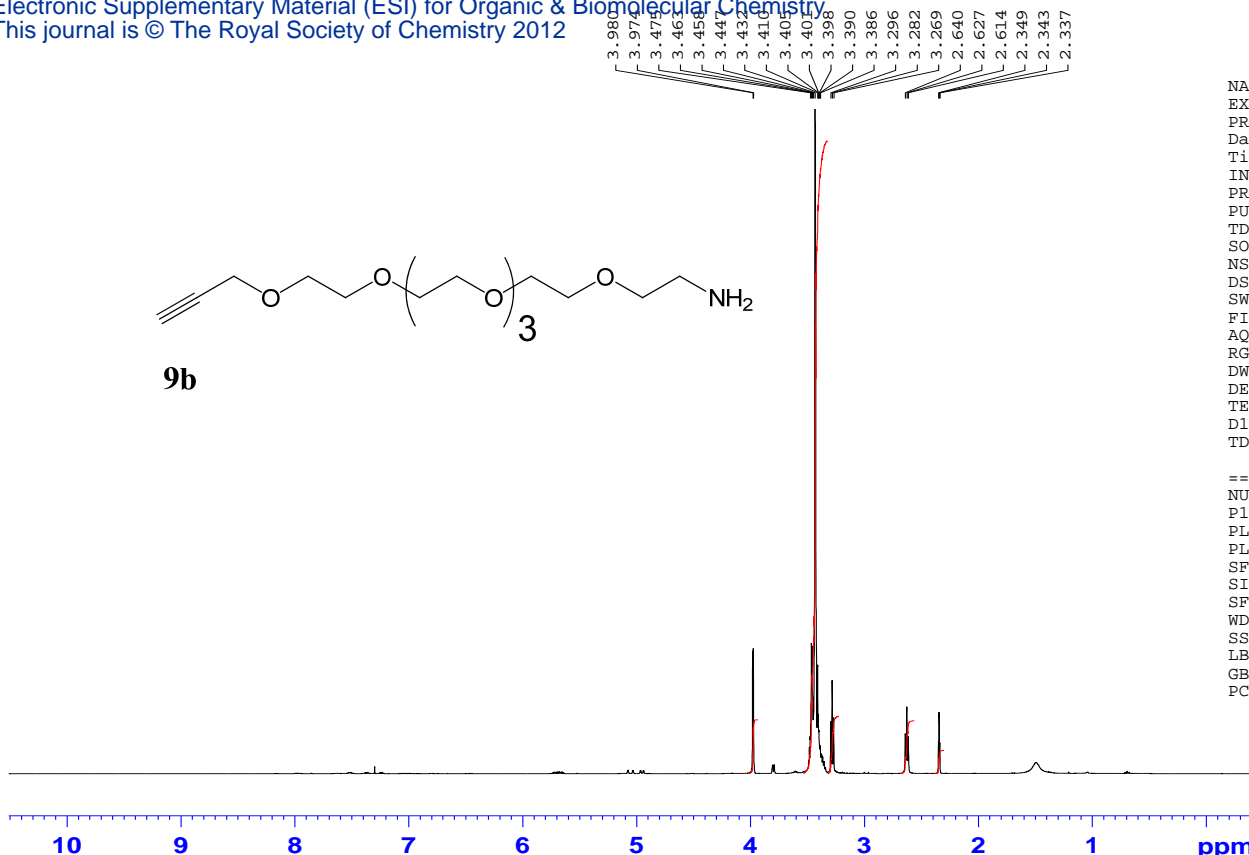

```

NAME      LG-815M_Alkyne-P6-NH2
EXPNO    1
PROCNO   1
Date_    20111027
Time     5.17
INSTRUM  spect
PROBHD   5 mm PABBO BB-
PULPROG  zg30
TD       65536
SOLVENT  CDCl3
NS       16
DS       2
SWH      8802.817 Hz
FIDRES   0.134320 Hz
AQ       3.7224948 sec
RG       10
DW       56.800 usec
DE       6.50 usec
TE       292.6 K
D1       1.00000000 sec
TD0      1
    
```

```

===== CHANNEL f1 =====
NUC1     1H
P1       14.85 usec
PL1     -0.60 dB
PL1W    13.81451130 W
SFO1    400.1320007 MHz
SI      32768
SF      400.1300000 MHz
WDW     EM
SSB     0
LB      0.30 Hz
GB      0
PC      1.00
    
```

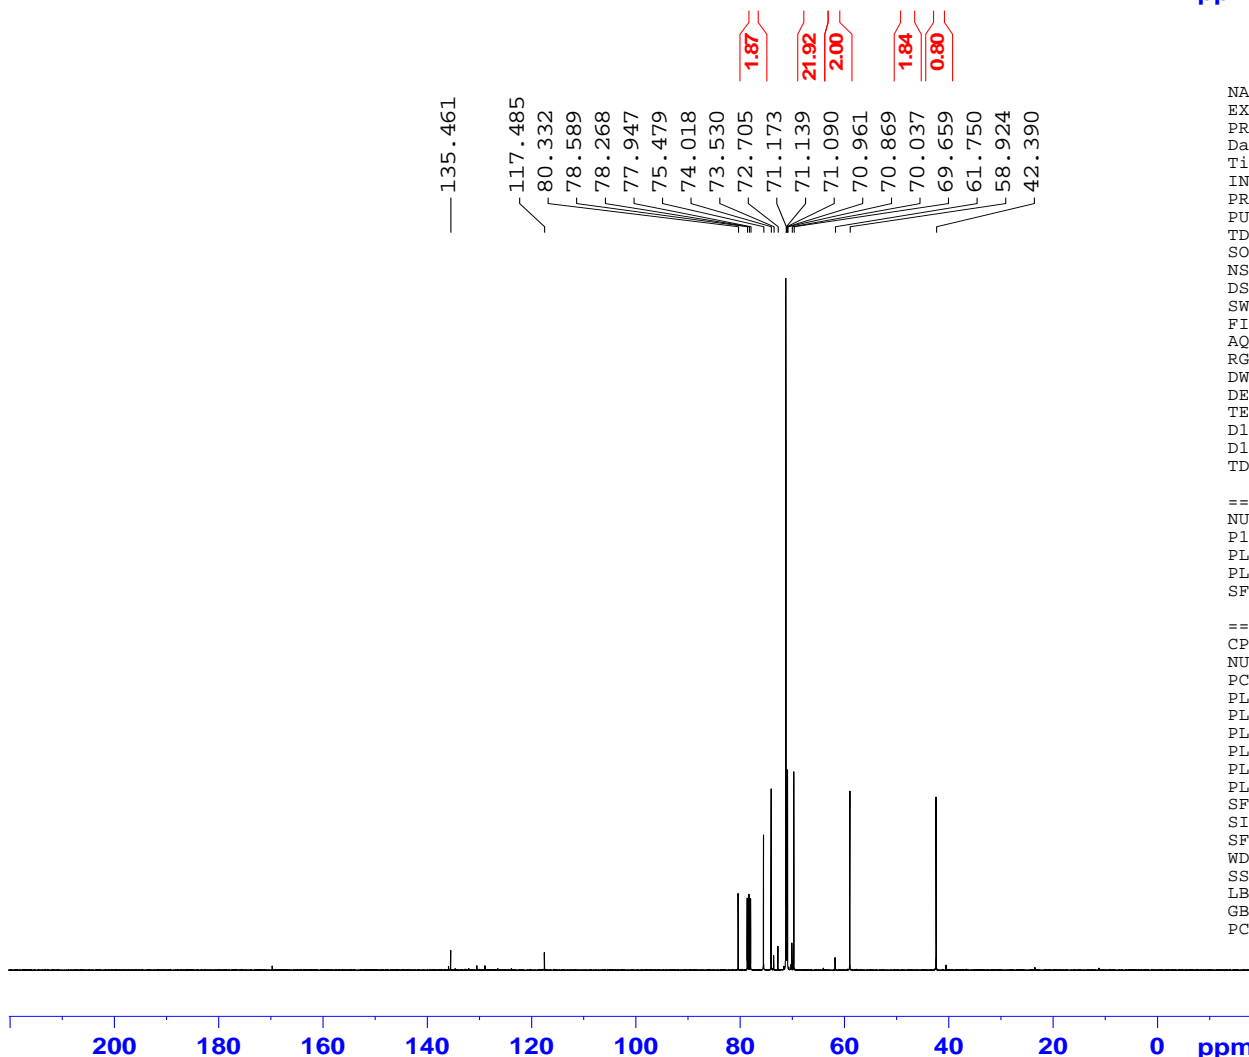

```

NAME      LG-815M_Alkyne-P6-NH2
EXPNO    2
PROCNO   1
Date_    20111027
Time     6.17
INSTRUM  spect
PROBHD   5 mm PABBO BB-
PULPROG  zgpg30
TD       65536
SOLVENT  CDCl3
NS       1024
DS       4
SWH      24038.461 Hz
FIDRES   0.366798 Hz
AQ       1.3631988 sec
RG       812
DW       20.800 usec
DE       6.50 usec
TE       294.5 K
D1       2.00000000 sec
D11     0.03000000 sec
TD0      1
    
```

```

===== CHANNEL f1 =====
NUC1     13C
P1       9.99 usec
PL1     -3.00 dB
PL1W    73.67452240 W
SFO1    100.6228298 MHz
    
```

```

===== CHANNEL f2 =====
CPDPRG2  waltz16
NUC2     1H
PCPD2    80.00 usec
PL2     -0.65 dB
PL12    13.40 dB
PL13    13.40 dB
PL2W    13.97447491 W
PL12W   0.54996562 W
PL13W   0.54996562 W
SFO2    400.1316005 MHz
SI      32768
SF      100.6126885 MHz
WDW     EM
SSB     0
LB      1.00 Hz
GB      0
PC      1.40
    
```

Mariner Spec / 1:39 (T / 0.00:0.68) ASC[BP = 320.2, 13306]

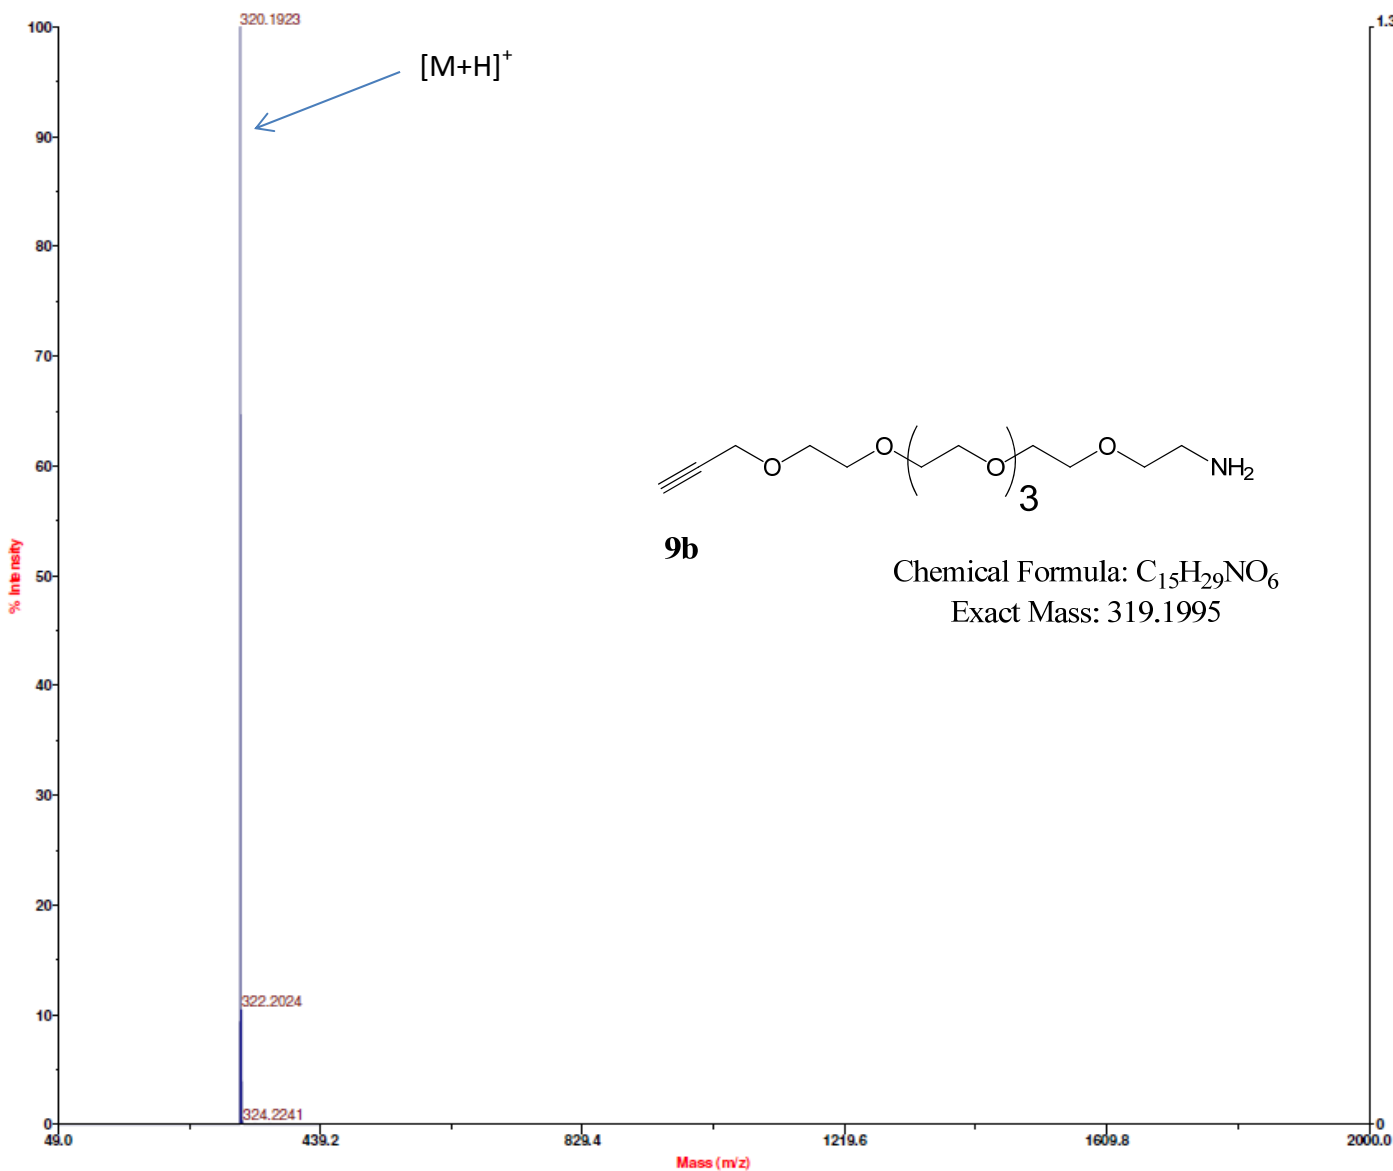

| --> Mariner System State <--          |                |
|---------------------------------------|----------------|
| Instrument State                      | ON             |
| Ion Polarity                          | POS            |
| Auxiliary Gas                         | ON             |
| Curtain Gas                           | ON             |
| Nebulizer Gas                         | ON             |
| Calibration Constant A                | 5.0146867E-007 |
| Calibration Constant B                | 77.798312      |
| TDC Deadtime                          | 10             |
| --> Source Settings <--               |                |
| Spray Tip Potential                   | 4509.96        |
| SCIEX Heater                          | 300.05         |
| --> API Interface Settings <--        |                |
| Nozzle Potential                      | 149.90         |
| Skimmer 1 Potential                   | 10.01          |
| Quadrupole DC Potential               | 5.49           |
| Deflection Voltage                    | 0.10           |
| Einzel Lens Potential                 | -24.00         |
| Quadrupole RF Voltage                 | 999.76         |
| Quadrupole Temperature                | 140.01         |
| Nozzle Temperature                    | 140.01         |
| --> Analyzer Settings <--             |                |
| Push Pulse Potential                  | 490.00         |
| Pull Pulse Potential                  | 213.11         |
| Pull Bias Potential                   | 10.00          |
| Acceleration Potential                | 3999.94        |
| Reflector Potential                   | 1549.99        |
| Detector Voltage                      | 1700.24        |
| --> Spectrum Acquisition Settings <-- |                |
| Seconds Per Spectrum                  | 1.00           |
| Ion Count Threshold                   | 0.00           |
| First Mass                            | 50.00          |
| Last Mass                             | 2000.00        |
| Accumulate Spectra                    | OFF            |
| Standby at End of Acquisition         | OFF            |
| --> Centroid Spectra Settings <--     |                |
| Centroid Spectra                      | OFF            |
| --> System Settings <--               |                |
| Gas Control Mode                      | Manual         |
| Syringe Pump Mode                     | Manual         |
| Syringe Pump Rate                     | 50.00          |
| Syringe Diameter                      | 3.26           |
| Min Analyzer Mass                     | 50.00          |
| Max Analyzer Mass                     | 4000.00        |

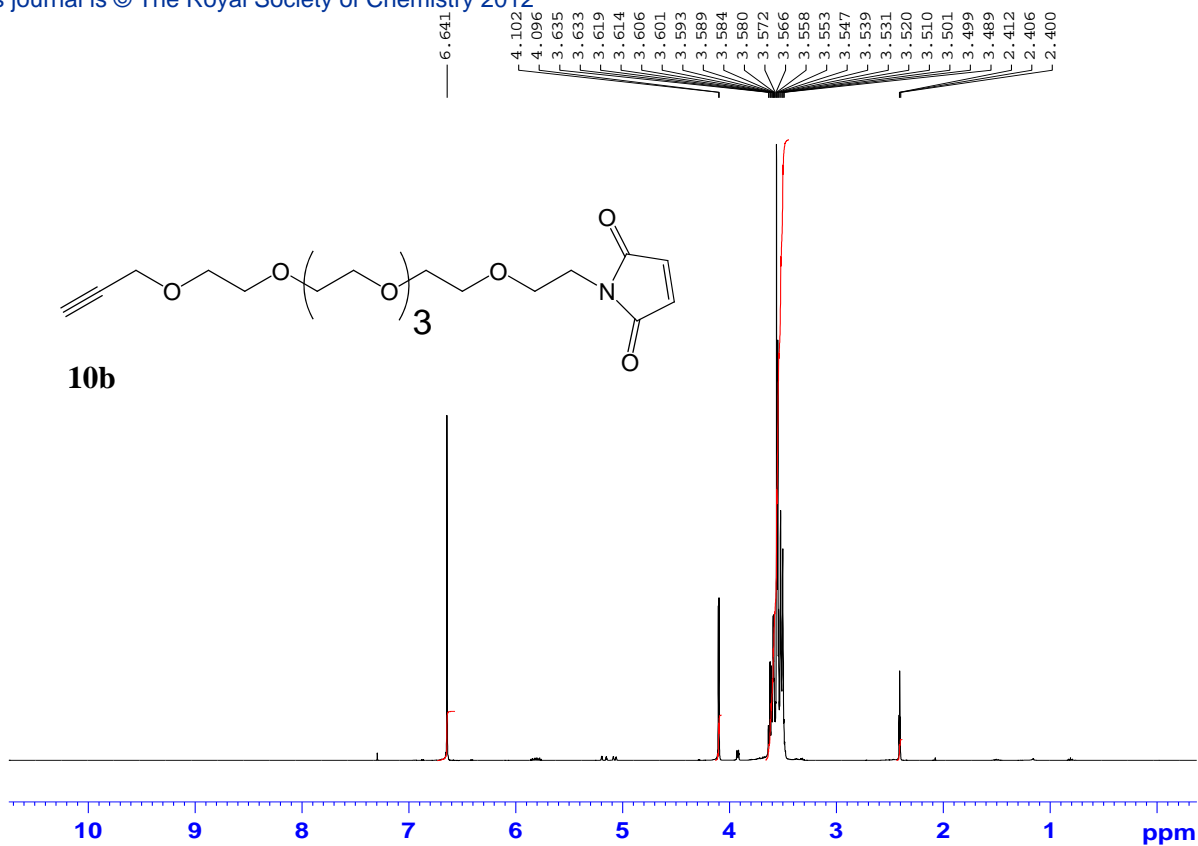

```

NAME      ZH3-139_Alk-P6-Mal
EXPNO    1
PROCNO   1
Date_    20111027
Time     21.05
INSTRUM  spect
PROBHD   5 mm PABBO BB-
PULPROG  zg30
TD       65536
SOLVENT  CDCl3
NS       16
DS       2
SWH      8802.817 Hz
FIDRES   0.134320 Hz
AQ       3.7224948 sec
RG       18
DW       56.800 usec
DE       6.50 usec
TE       292.4 K
D1       1.00000000 sec
D10      1
    
```

```

===== CHANNEL f1 =====
NUC1     1H
P1       14.85 usec
PL1      -0.60 dB
PL1W     13.81451130 W
SFO1     400.1320007 MHz
SI       32768
SF       400.1300000 MHz
WDW      EM
SSB      0
LB       0.30 Hz
GB       0
PC       1.00
    
```

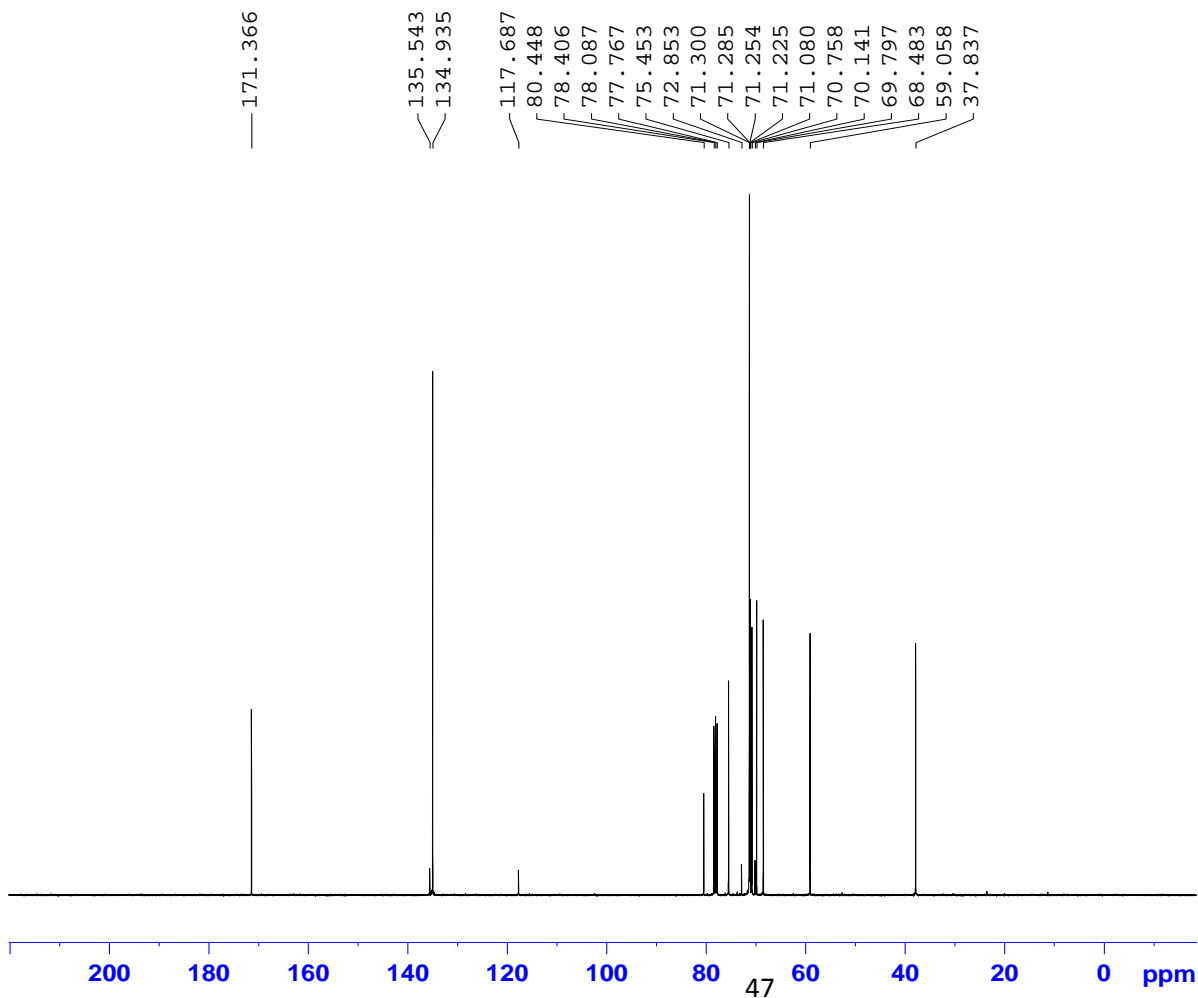

```

NAME      ZH3-139_Alk-P6-Mal
EXPNO    2
PROCNO   1
Date_    20111027
Time     22.05
INSTRUM  spect
PROBHD   5 mm PABBO BB-
PULPROG  zgpg30
TD       65536
SOLVENT  CDCl3
NS       1024
DS       4
SWH      24038.461 Hz
FIDRES   0.366798 Hz
AQ       1.3631988 sec
RG       724
DW       20.800 usec
DE       6.50 usec
TE       294.4 K
D1       2.00000000 sec
D11      0.03000000 sec
D10      1
    
```

```

===== CHANNEL f1 =====
NUC1     13C
P1       9.99 usec
PL1      -3.00 dB
PL1W     73.67452240 W
SFO1     100.6228298 MHz
    
```

```

===== CHANNEL f2 =====
CPDPRG2  waltz16
NUC2     1H
PCPD2    80.00 usec
PL2      -0.65 dB
PL12     13.40 dB
PL13     13.40 dB
PL2W     13.97447491 W
PL12W    0.54996562 W
PL13W    0.54996562 W
SFO2     400.1316005 MHz
SI       32768
SF       100.6126885 MHz
WDW      EM
SSB      0
LB       1.00 Hz
GB       0
PC       1.40
    
```

Mariner Spec /1:25 (T/0.00:0.43) ASC[BP = 422.1, 167]

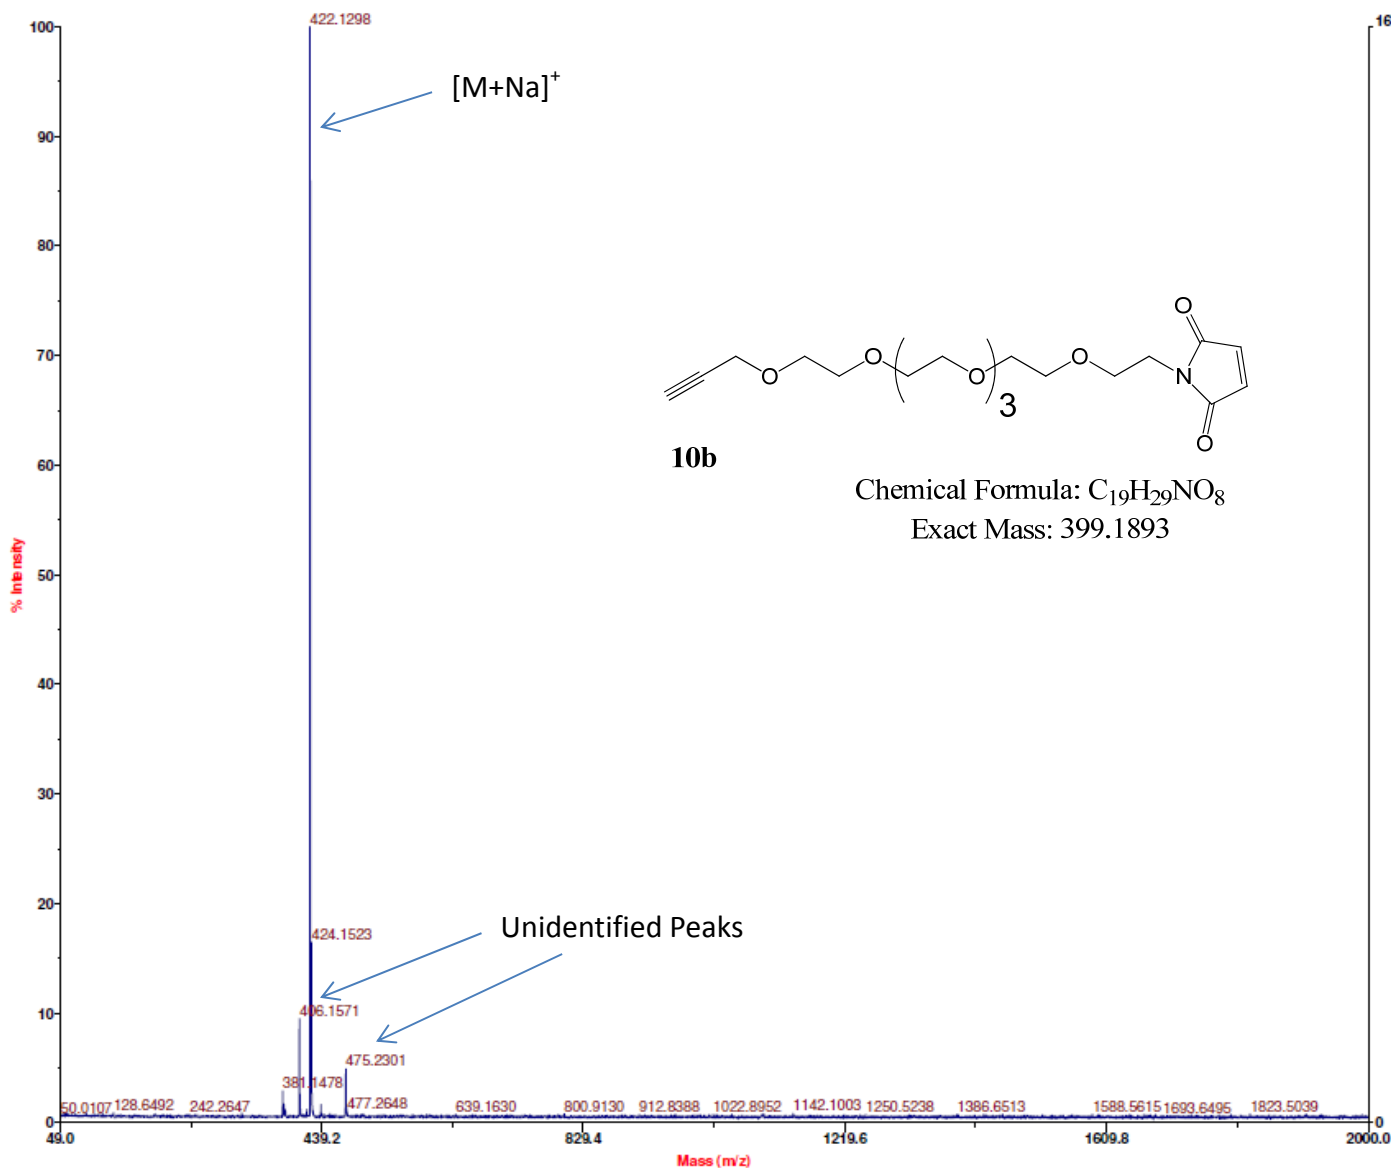

|                                       |                |
|---------------------------------------|----------------|
| --> Mariner System State <--          |                |
| Instrument State                      | ON             |
| Ion Polarity                          | POS            |
| Auxiliary Gas                         | ON             |
| Curtain Gas                           | ON             |
| Nebulizer Gas                         | ON             |
| Calibration Constant A                | 5.0146867E-007 |
| Calibration Constant B                | 77.798312      |
| TDC Deadtime                          | 10             |
| --> Source Settings <--               |                |
| Spray Tip Potential                   | 4509.96        |
| SCIEX Heater                          | 300.05         |
| --> API Interface Settings <--        |                |
| Nozzle Potential                      | 40.04          |
| Skimmer 1 Potential                   | 10.01          |
| Quadrupole DC Potential               | 5.49           |
| Deflection Voltage                    | 0.10           |
| Einzel Lens Potential                 | -24.00         |
| Quadrupole RF Voltage                 | 999.76         |
| Quadrupole Temperature                | 140.01         |
| Nozzle Temperature                    | 140.01         |
| --> Analyzer Settings <--             |                |
| Push Pulse Potential                  | 490.00         |
| Pull Pulse Potential                  | 213.11         |
| Pull Bias Potential                   | 10.00          |
| Acceleration Potential                | 3999.94        |
| Reflector Potential                   | 1549.99        |
| Detector Voltage                      | 1700.24        |
| --> Spectrum Acquisition Settings <-- |                |
| Seconds Per Spectrum                  | 1.00           |
| Ion Count Threshold                   | 0.00           |
| First Mass                            | 50.00          |
| Last Mass                             | 2000.00        |
| Accumulate Spectra                    | OFF            |
| Standby at End of Acquisition         | OFF            |
| --> Centroid Spectra Settings <--     |                |
| Centroid Spectra                      | OFF            |
| --> System Settings <--               |                |
| Gas Control Mode                      | Manual         |
| Syringe Pump Mode                     | Manual         |
| Syringe Pump Rate                     | 50.00          |
| Syringe Diameter                      | 3.26           |
| Min Analyzer Mass                     | 50.00          |
| Max Analyzer Mass                     | 4000.00        |

Acquired: Oct 27 16:17:00 2011  
Mariner Mass Spectrum  
C:\Mariner\Data\2011\Oct\27\_Thu\ZH3-139001.dat

Printed: 16:19, October 27, 2011

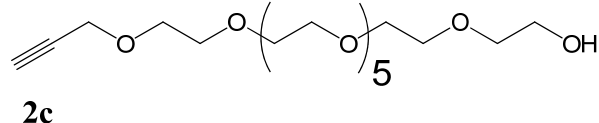

```

NAME      LG-698_Alk-P8-OH
EXPNO     1
PROCNO    1
Date_     20110519
Time      18.34
INSTRUM   spect
PROBHD    5 mm PABBO BB-
PULPROG   zg30
TD        65536
SOLVENT   CDCl3
NS        16
DS        2
SWH       8802.817 Hz
FIDRES    0.134320 Hz
AQ        3.7224948 sec
RG        71.8
DW        56.800 usec
DE        6.50 usec
TE        292.4 K
D1        1.00000000 sec
TD0       1
    
```

```

===== CHANNEL f1 =====
NUC1      1H
P1        14.85 usec
PL1       -0.60 dB
PL1W      13.81451130 W
SFO1      400.1320007 MHz
SI        32768
SF        400.1300000 MHz
WDW       EM
SSB       0
LB        0.30 Hz
GB        0
PC        1.00
    
```

10 9 8 7 6 5 4 3 2 1 ppm

80.474  
78.164  
78.049  
77.846  
77.528  
75.333  
73.444  
71.402  
71.361  
71.308  
71.192  
71.076  
69.914  
62.498  
59.189

2.00  
33.84  
0.96  
2.81

```

NAME      LG-698_Alk-P8-OH
EXPNO     2
PROCNO    1
Date_     20110519
Time      19.35
INSTRUM   spect
PROBHD    5 mm PABBO BB-
PULPROG   zgpg30
TD        65536
SOLVENT   CDCl3
NS        1024
DS        4
SWH       24038.461 Hz
FIDRES    0.366798 Hz
AQ        1.3631988 sec
RG        71.8
DW        20.800 usec
DE        6.50 usec
TE        294.9 K
D1        2.00000000 sec
D11       0.03000000 sec
TD0       1
    
```

```

===== CHANNEL f1 =====
NUC1      13C
P1        9.99 usec
PL1       -3.00 dB
PL1W      73.67452240 W
SFO1      100.6228298 MHz
    
```

```

===== CHANNEL f2 =====
CPDPRG2   waltz16
NUC2      1H
PCPD2     80.00 usec
PL2       -0.65 dB
PL12      13.40 dB
PL13      13.40 dB
PL2W      13.97447491 W
PL12W     0.54996562 W
PL13W     0.54996562 W
SFO2      400.1316005 MHz
SI        32768
SF        100.6126885 MHz
WDW       EM
SSB       0
LB        1.00 Hz
GB        0
PC        1.40
    
```

200 180 160 140 120 100 80 60 40 20 0 ppm

Mariner Spec /1:20 (T/0.00:0.34) ASC[BP = 431.3, 98]

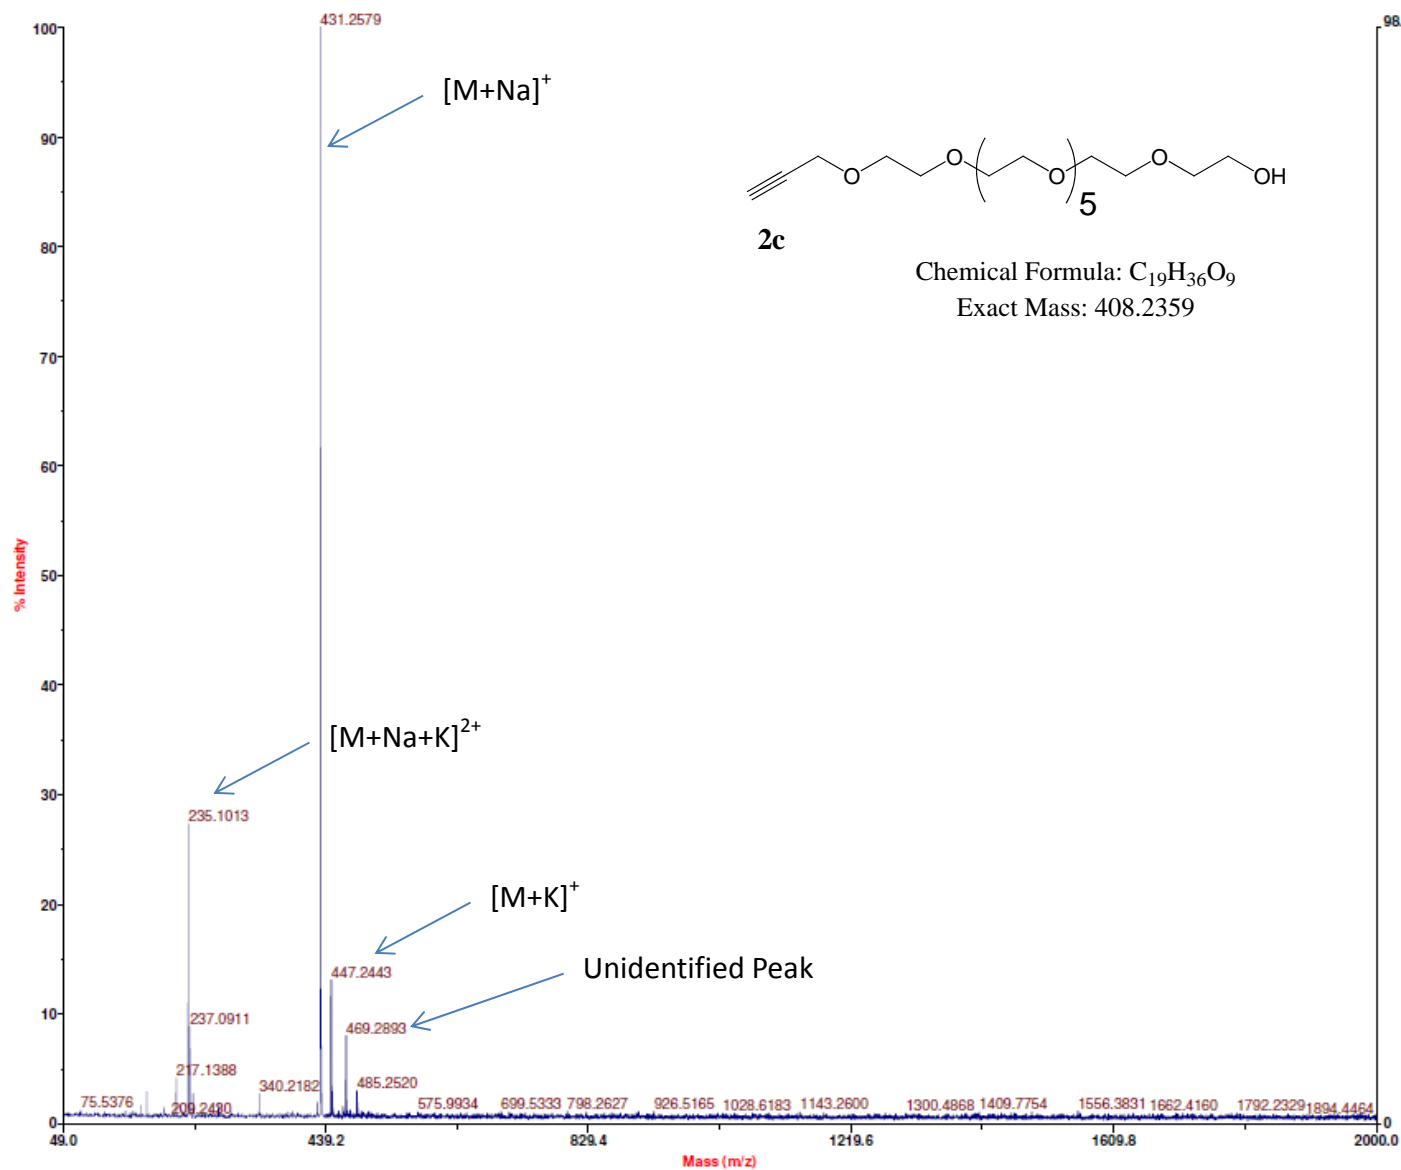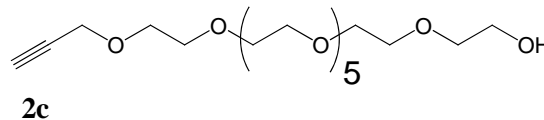

Chemical Formula:  $C_{19}H_{36}O_9$   
Exact Mass: 408.2359

--> Mariner System State <--

|                                       |                |
|---------------------------------------|----------------|
| Instrument State                      | ON             |
| Ion Polarity                          | POS            |
| Auxiliary Gas                         | ON             |
| Curtain Gas                           | ON             |
| Nebulizer Gas                         | ON             |
| Calibration Constant A                | 5.0174991E-007 |
| Calibration Constant B                | 78.221559      |
| TDC Deadtime                          | 10             |
| --> Source Settings <--               |                |
| Spray Tip Potential                   | 4509.96        |
| SCIEX Heater                          | 300.05         |
| --> API Interface Settings <--        |                |
| Nozzle Potential                      | 120.12         |
| Skimmer 1 Potential                   | 10.01          |
| Quadrupole DC Potential               | 5.49           |
| Deflection Voltage                    | 0.10           |
| Einzel Lens Potential                 | -24.00         |
| Quadrupole RF Voltage                 | 999.76         |
| Quadrupole Temperature                | 140.01         |
| Nozzle Temperature                    | 140.01         |
| --> Analyzer Settings <--             |                |
| Push Pulse Potential                  | 490.00         |
| Pull Pulse Potential                  | 213.11         |
| Pull Bias Potential                   | 10.00          |
| Acceleration Potential                | 3999.94        |
| Reflector Potential                   | 1549.99        |
| Detector Voltage                      | 1700.89        |
| --> Spectrum Acquisition Settings <-- |                |
| Seconds Per Spectrum                  | 1.00           |
| Ion Count Threshold                   | 0.00           |
| First Mass                            | 50.00          |
| Last Mass                             | 2000.00        |
| Accumulate Spectra                    | OFF            |
| Standby at End of Acquisition         | OFF            |
| --> Centroid Spectra Settings <--     |                |
| Centroid Spectra                      | OFF            |
| --> System Settings <--               |                |
| Gas Control Mode                      | Manual         |
| Syringe Pump Mode                     | Manual         |
| Syringe Pump Rate                     | 50.00          |
| Syringe Diameter                      | 3.26           |
| Min Analyzer Mass                     | 50.00          |
| Max Analyzer Mass                     | 4000.00        |

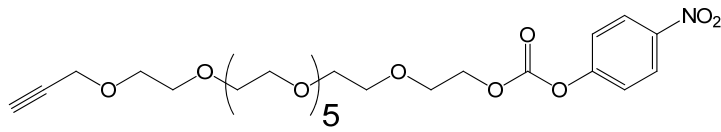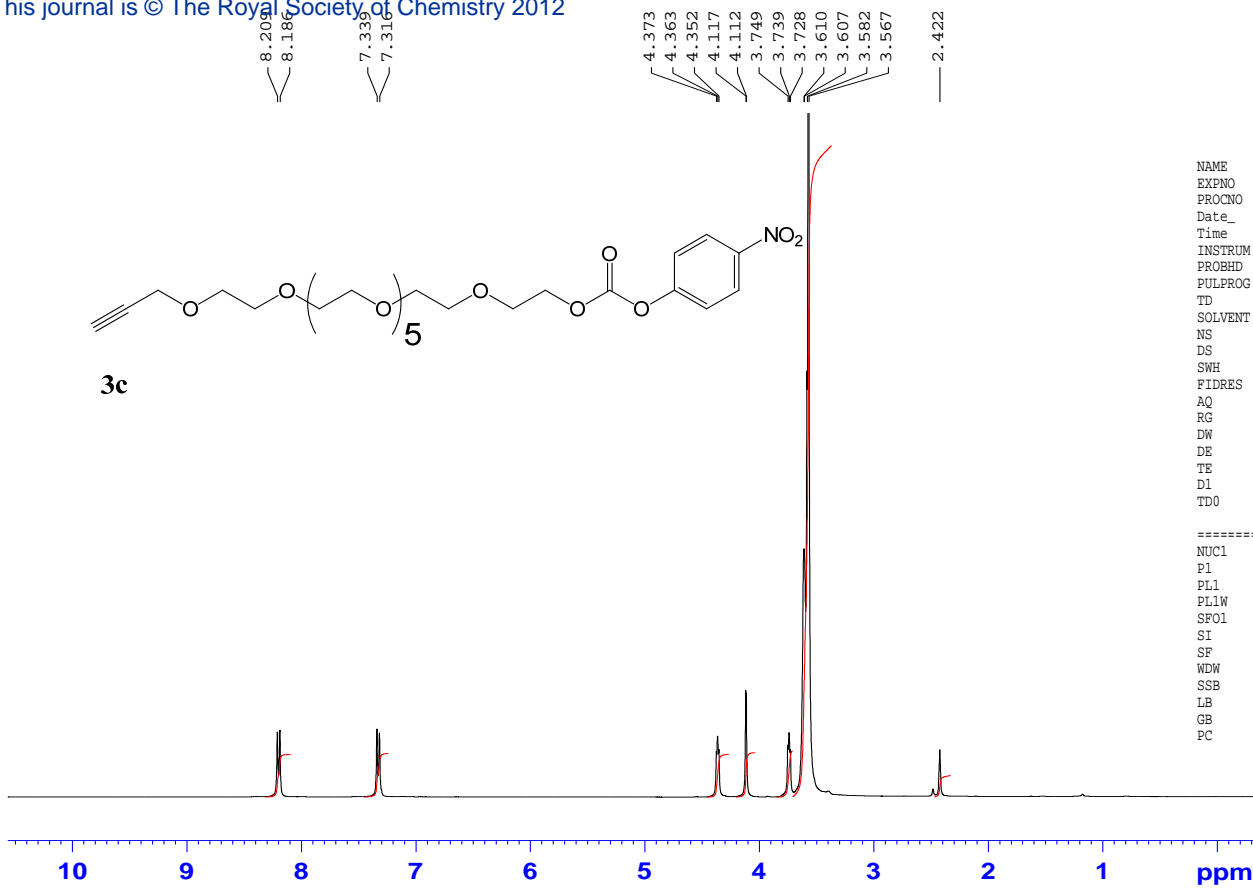

```

NAME LG-793P2_Alkyne-P8-p-NO2-Ph-carbonate
EXPNO 1
PROCNO 1
Date_ 20110928
Time 18.17
INSTRUM spect
PROBHD 5 mm PABBO BB-
PULPROG zg30
TD 65536
SOLVENT CDCl3
NS 16
DS 2
SWH 8802.817 Hz
FIDRES 0.134320 Hz
AQ 3.7224948 sec
RG 16
DW 56.800 usec
DE 6.50 usec
TE 292.9 K
D1 1.0000000 sec
TDO 1
    
```

```

===== CHANNEL f1 =====
NUC1 1H
P1 14.85 usec
PL1 -0.60 dB
PL1W 13.81451130 W
SFO1 400.1320007 MHz
SI 32768
SF 400.1300000 MHz
WDW EM
SSB 0
LB 0.30 Hz
GB 0
PC 1.00
    
```

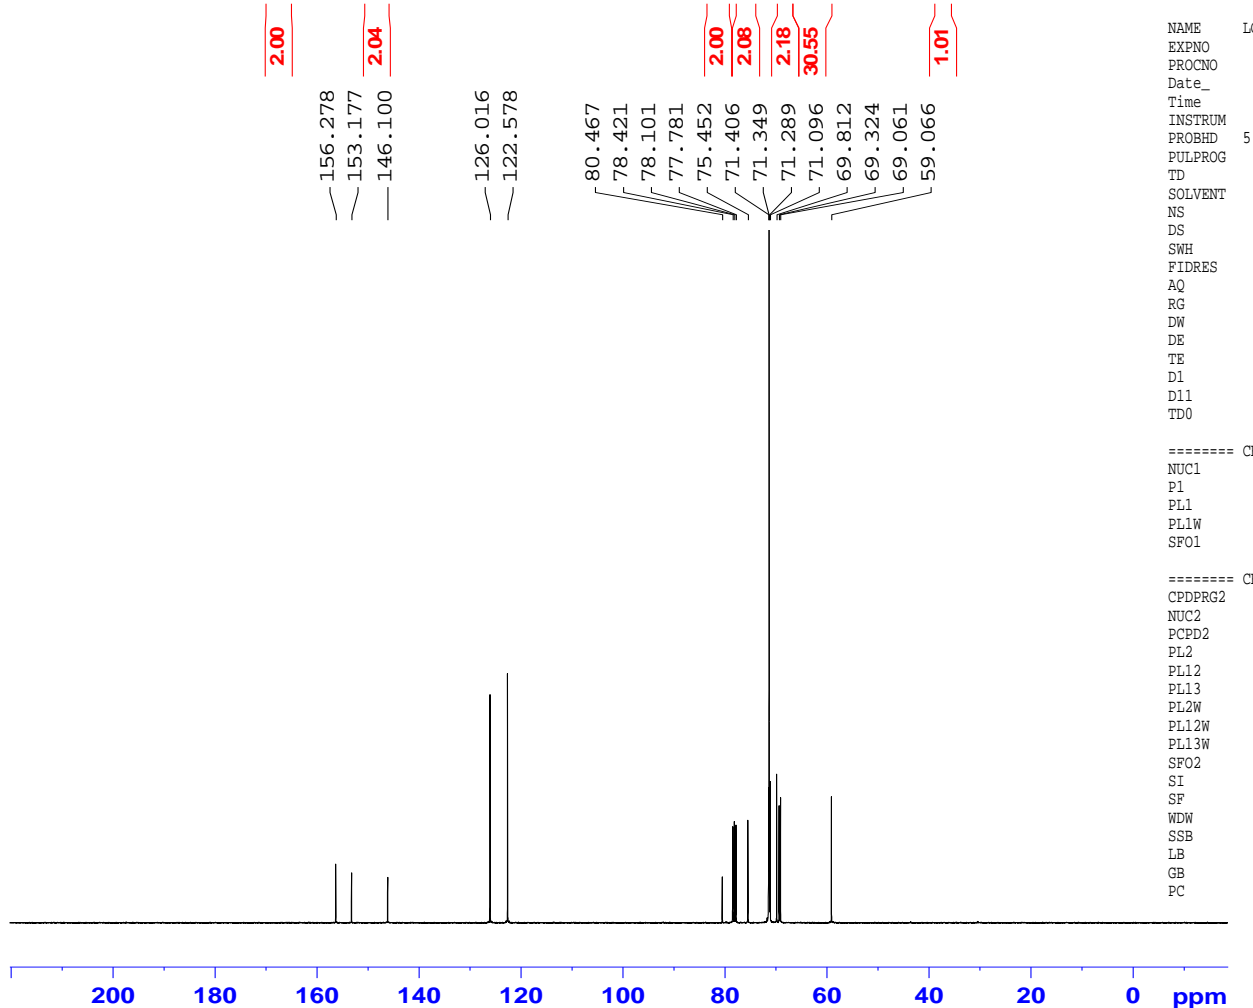

```

NAME LG-793P2_Alkyne-P8-p-NO2-Ph-carbonate
EXPNO 2
PROCNO 1
Date_ 20110928
Time 19.36
INSTRUM spect
PROBHD 5 mm PABBO BB-
PULPROG zgpg30
TD 65536
SOLVENT CDCl3
NS 1024
DS 4
SWH 24038.461 Hz
FIDRES 0.366798 Hz
AQ 1.3631988 sec
RG 1030
DW 20.800 usec
DE 6.50 usec
TE 294.6 K
D1 2.0000000 sec
D11 0.0300000 sec
TDO 1
    
```

```

===== CHANNEL f1 =====
NUC1 13C
P1 9.99 usec
PL1 -3.00 dB
PL1W 73.67452240 W
SFO1 100.6228298 MHz
    
```

```

===== CHANNEL f2 =====
CPDPRG2 waltz16
NUC2 1H
PCPD2 80.00 usec
PL2 -0.65 dB
PL12 13.40 dB
PL13 13.40 dB
PL12W 13.97447491 W
PL12W 0.54996562 W
PL13W 0.54996562 W
SFO2 400.1316005 MHz
SI 32768
SF 100.6126885 MHz
WDW EM
SSB 0
LB 1.00 Hz
GB 0
PC 1.40
    
```

Mariner Spec /1:59 (T/0.00:1.03) ASC[BP = 596.1, 2938]

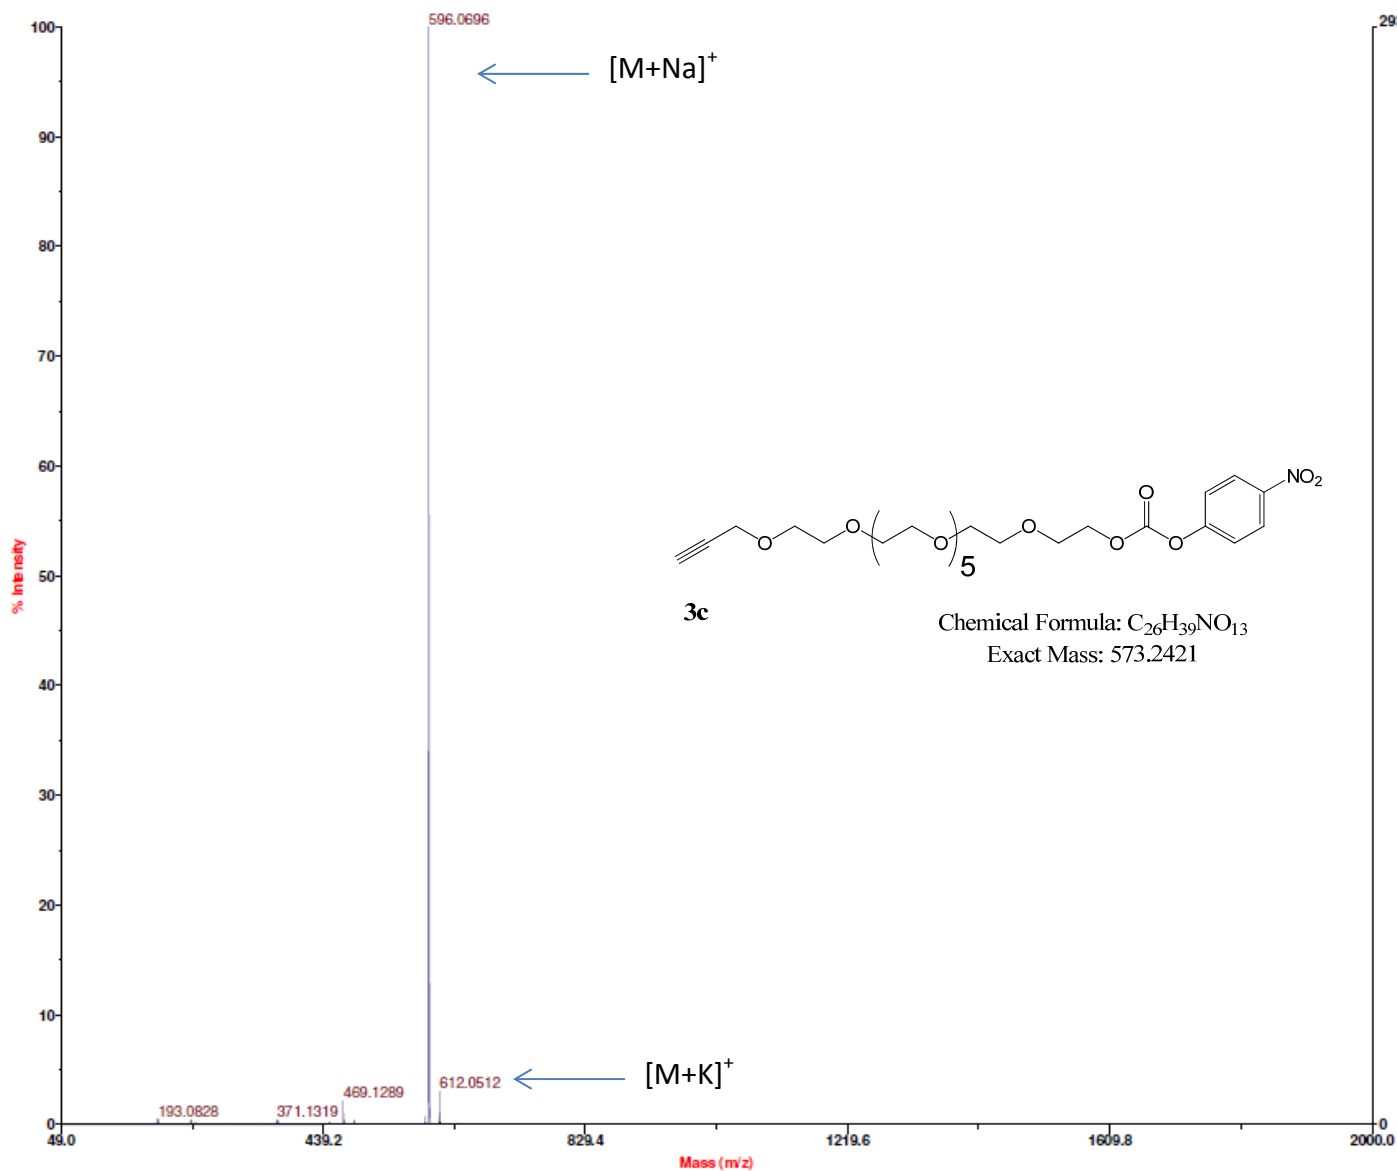

|                                       |                |
|---------------------------------------|----------------|
| --> Mariner System State <--          |                |
| Instrument State                      | ON             |
| Ion Polarity                          | POS            |
| Auxiliary Gas                         | ON             |
| Curtain Gas                           | ON             |
| Nebulizer Gas                         | ON             |
| Calibration Constant A                | 5.0146867E-007 |
| Calibration Constant B                | 77.798312      |
| TDC Deadtime                          | 10             |
| --> Source Settings <--               |                |
| Spray Tip Potential                   | 4509.96        |
| SCIEX Heater                          | 300.05         |
| --> API Interface Settings <--        |                |
| Nozzle Potential                      | 120.12         |
| Skimmer 1 Potential                   | 10.01          |
| Quadrupole DC Potential               | 5.49           |
| Deflection Voltage                    | 0.10           |
| Einzel Lens Potential                 | -24.00         |
| Quadrupole RF Voltage                 | 999.76         |
| Quadrupole Temperature                | 140.01         |
| Nozzle Temperature                    | 140.01         |
| --> Analyzer Settings <--             |                |
| Push Pulse Potential                  | 490.00         |
| Pull Pulse Potential                  | 213.11         |
| Pull Bias Potential                   | 10.00          |
| Acceleration Potential                | 3999.94        |
| Reflector Potential                   | 1549.99        |
| Detector Voltage                      | 1700.24        |
| --> Spectrum Acquisition Settings <-- |                |
| Seconds Per Spectrum                  | 1.00           |
| Ion Count Threshold                   | 0.00           |
| First Mass                            | 50.00          |
| Last Mass                             | 2000.00        |
| Accumulate Spectra                    | OFF            |
| Standby at End of Acquisition         | OFF            |
| --> Centroid Spectra Settings <--     |                |
| Centroid Spectra                      | OFF            |
| --> System Settings <--               |                |
| Gas Control Mode                      | Manual         |
| Syringe Pump Mode                     | Manual         |
| Syringe Pump Rate                     | 50.00          |
| Syringe Diameter                      | 3.26           |
| Min Analyzer Mass                     | 50.00          |
| Max Analyzer Mass                     | 4000.00        |



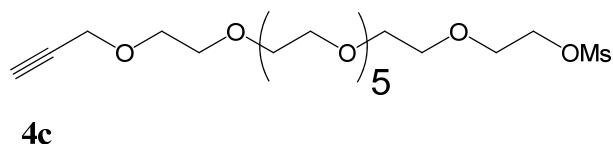

```

NAME      LG-719M_Alkyne-OEG-OMs
EXPNO     1
PROCNO    1
Date_     20110614
Time      21.35
INSTRUM   spect
PROBHD    5 mm PABBO BB-
PULPROG   zg30
TD        65536
SOLVENT   CDCl3
NS        64
DS        2
SWH       8802.817 Hz
FIDRES    0.134320 Hz
AQ        3.7224948 sec
RG        20.2
DW        56.800 usec
DE        6.50 usec
TE        293.2 K
D1        1.00000000 sec
TD0       1
    
```

```

===== CHANNEL f1 =====
NUC1      1H
P1        14.85 usec
PL1       -0.60 dB
PL1W     13.81451130 W
SF01     400.1320007 MHz
SI        32768
SF        400.1300000 MHz
WDW       EM
SSB       0
LB        0.30 Hz
GB        0
PC        1.00
    
```

10 9 8 7 6 5 4 3 2 1 ppm

2.00  
2.16  
2.10  
29.76  
0.33  
3.02  
1.00

80.469  
78.373  
78.054  
77.735  
75.441  
71.348  
71.294  
71.233  
71.109  
70.146  
69.833  
69.733  
59.094  
38.438  
32.399

```

NAME      LG-719M_Alkyne-OEG-OMs
EXPNO     2
PROCNO    1
Date_     20110614
Time      22.35
INSTRUM   spect
PROBHD    5 mm PABBO BB-
PULPROG   zgpg30
TD        65536
SOLVENT   CDCl3
NS        1024
DS        4
SWH       24038.461 Hz
FIDRES    0.366798 Hz
AQ        1.3631988 sec
RG        1030
DW        20.800 usec
DE        6.50 usec
TE        294.9 K
D1        2.00000000 sec
D11       0.03000000 sec
TD0       1
    
```

```

===== CHANNEL f1 =====
NUC1      13C
P1        9.99 usec
PL1       -3.00 dB
PL1W     73.67452240 W
SF01     100.6228298 MHz
    
```

```

===== CHANNEL f2 =====
CPDPRG2   waltz16
NUC2      1H
PCPD2     80.00 usec
PL2       -0.65 dB
PL12     13.40 dB
PL13     13.40 dB
PL2W     13.97447491 W
PL12W    0.54996562 W
PL13W    0.54996562 W
SF02     400.1316005 MHz
SI        32768
SF        100.6126885 MHz
WDW       EM
SSB       0
LB        1.00 Hz
GB        0
PC        1.40
    
```

200 180 160 140 120 100 80 60 40 20 0 ppm

### Applied Biosystems Mariner System 5268

Mariner Spec /1:38 (T /0.00:0.66) ASC[BP = 509.3, 88]

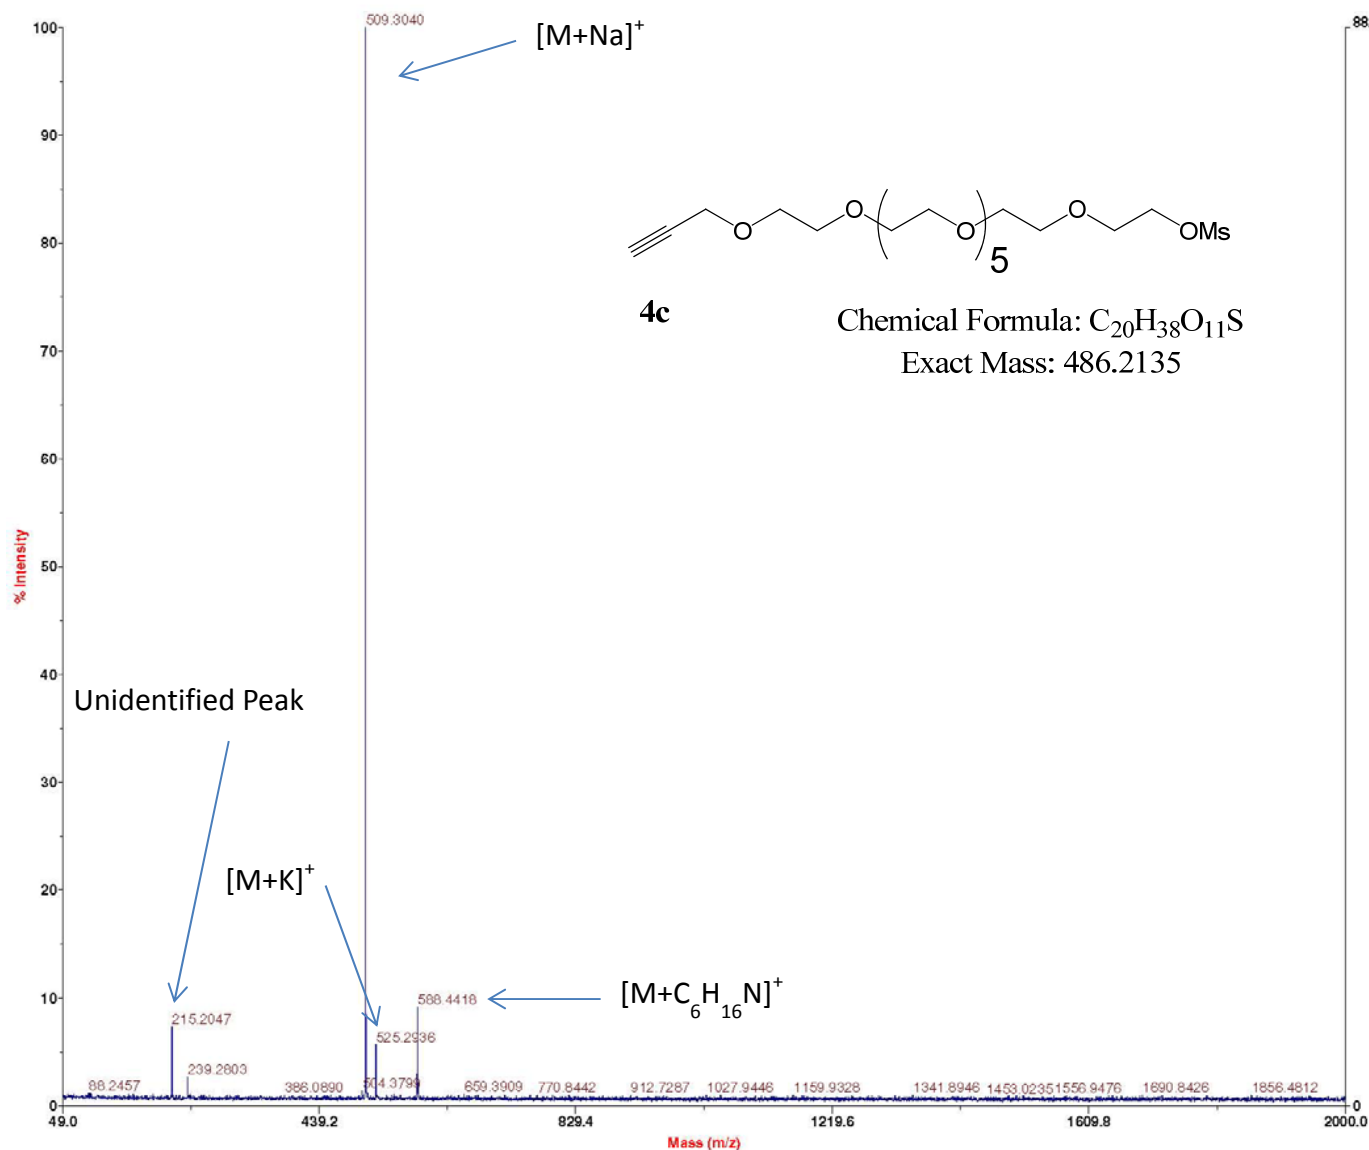

|                                       |                |
|---------------------------------------|----------------|
| --> Mariner System State <--          |                |
| Instrument State                      | ON             |
| Ion Polarity                          | POS            |
| Auxiliary Gas                         | ON             |
| Curtain Gas                           | ON             |
| Nebulizer Gas                         | ON             |
| Calibration Constant A                | 5.0174991E-007 |
| Calibration Constant B                | 78.221559      |
| TDC Deadtime                          | 10             |
| --> Source Settings <--               |                |
| Spray Tip Potential                   | 4509.96        |
| SCIEX Heater                          | 300.05         |
| --> API Interface Settings <--        |                |
| Nozzle Potential                      | 40.04          |
| Skimmer 1 Potential                   | 10.01          |
| Quadrupole DC Potential               | 5.49           |
| Deflection Voltage                    | 0.10           |
| Einzel Lens Potential                 | -24.00         |
| Quadrupole RF Voltage                 | 999.78         |
| Quadrupole Temperature                | 140.01         |
| Nozzle Temperature                    | 140.01         |
| --> Analyzer Settings <--             |                |
| Push Pulse Potential                  | 490.00         |
| Pull Pulse Potential                  | 213.11         |
| Pull Bias Potential                   | 10.00          |
| Acceleration Potential                | 3999.94        |
| Reflector Potential                   | 1549.99        |
| Detector Voltage                      | 1700.24        |
| --> Spectrum Acquisition Settings <-- |                |
| Seconds Per Spectrum                  | 1.00           |
| Ion Count Threshold                   | 0.00           |
| First Mass                            | 50.00          |
| Last Mass                             | 2000.00        |
| Accumulate Spectra                    | OFF            |
| Standby at End of Acquisition         | OFF            |
| --> Centroid Spectra Settings <--     |                |
| Centroid Spectra                      | OFF            |
| --> System Settings <--               |                |
| Gas Control Mode                      | Manual         |
| Syringe Pump Mode                     | Manual         |
| Syringe Pump Rate                     | 50.00          |
| Syringe Diameter                      | 3.26           |
| Min Analyzer Mass                     | 50.00          |
| Max Analyzer Mass                     | 4000.00        |

Acquired: May 24 11:33:00 2011  
 Mariner Mass Spectrum  
 C:\Mariner\Data\2011\May\24 Tues\LNG-700001.dat

Printed: 11:34, May 24, 2011

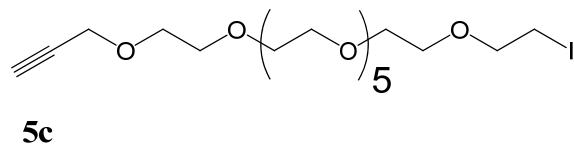

3.986  
3.974  
3.553  
3.536  
3.519  
3.477  
3.459  
3.456  
3.436  
3.425  
3.072  
3.055  
3.038  
2.389  
2.383  
2.377

```

NAME      ZH3-118_Alk-P8-I
EXPNO     1
PROCNO    1
Date_     20110927
Time      21.04
INSTRUM   spect
PROBHD    5 mm PABBO BB-
PULPROG   zg30
TD         65536
SOLVENT   CDCl3
NS         16
DS         2
SWH        8802.817 Hz
FIDRES     0.134320 Hz
AQ         3.7224948 sec
RG         9
DW         56.800 usec
DE         6.50 usec
TE         292.5 K
D1         1.00000000 sec
TD0        1
    
```

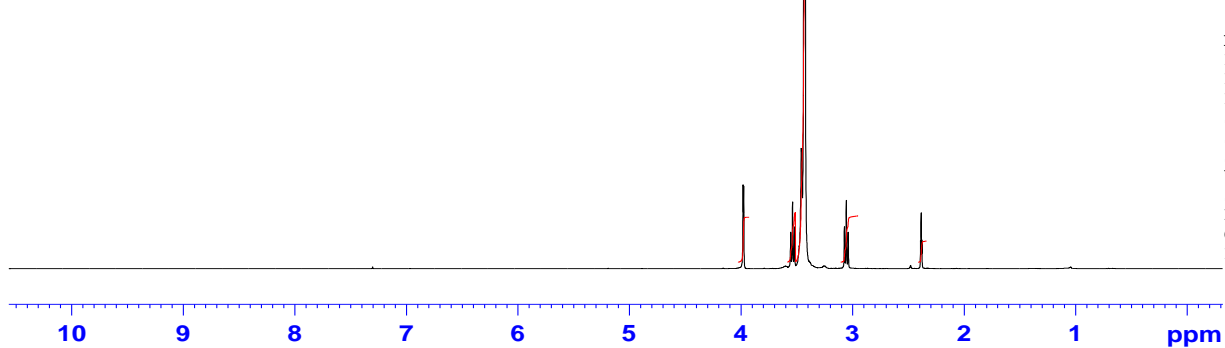

```

===== CHANNEL f1 =====
NUC1      1H
P1         14.85 usec
PL1        -0.60 dB
PL1W       13.81451130 W
SFO1       400.1320007 MHz
SI         32768
SF         400.1300000 MHz
WDW        EM
SSB        0
LB         0.30 Hz
GB         0
PC         1.00
    
```

80.428  
78.764  
78.442  
78.120  
75.719  
72.517  
71.263  
71.195  
70.985  
70.819  
69.680  
58.962

```

NAME      ZH3-118_Alk-P8-I
EXPNO     2
PROCNO    1
Date_     20110927
Time      22.04
INSTRUM   spect
PROBHD    5 mm PABBO BB-
PULPROG   zgpg30
TD         65536
SOLVENT   CDCl3
NS         1024
DS         4
SWH        24038.461 Hz
FIDRES     0.366798 Hz
AQ         1.3631988 sec
RG         724
DW         20.800 usec
DE         6.50 usec
TE         294.4 K
D1         2.00000000 sec
D11        0.03000000 sec
TD0        1
    
```

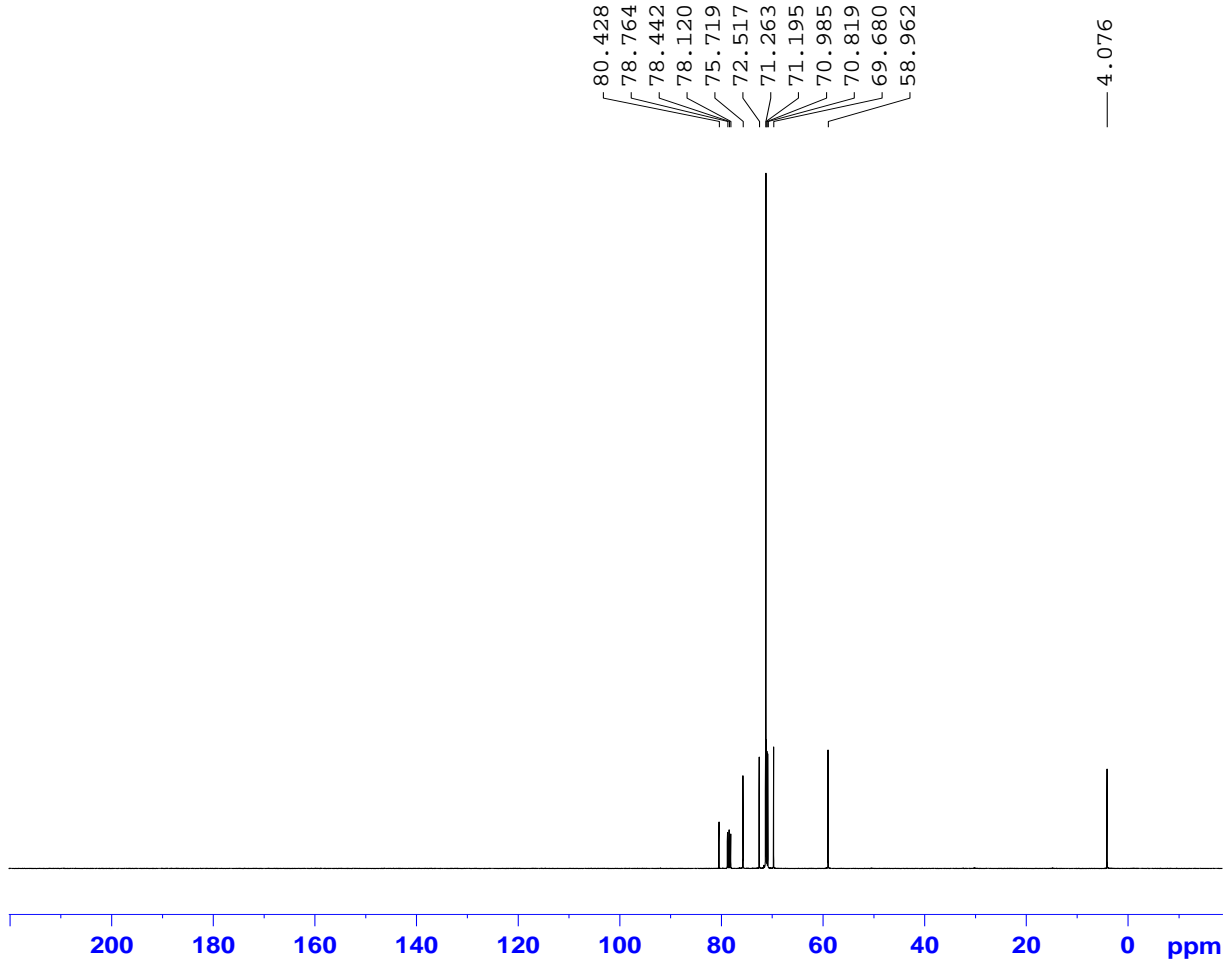

```

===== CHANNEL f1 =====
NUC1      13C
P1         9.99 usec
PL1        -3.00 dB
PL1W       73.67452240 W
SFO1       100.6228298 MHz
    
```

```

===== CHANNEL f2 =====
CPDPRG2   waltz16
NUC2      1H
PCPD2     80.00 usec
PL2        -0.65 dB
PL12       13.40 dB
PL13       13.40 dB
PL2W       13.97447491 W
PL12W      0.54996562 W
PL13W      0.54996562 W
SFO2       400.1316005 MHz
SI         32768
SF         100.6126885 MHz
WDW        EM
SSB        0
LB         1.00 Hz
GB         0
PC         1.40
    
```

Mariner Spec /1:27 (T /0.00:0.46) ASC[BP = 519.2, 129]

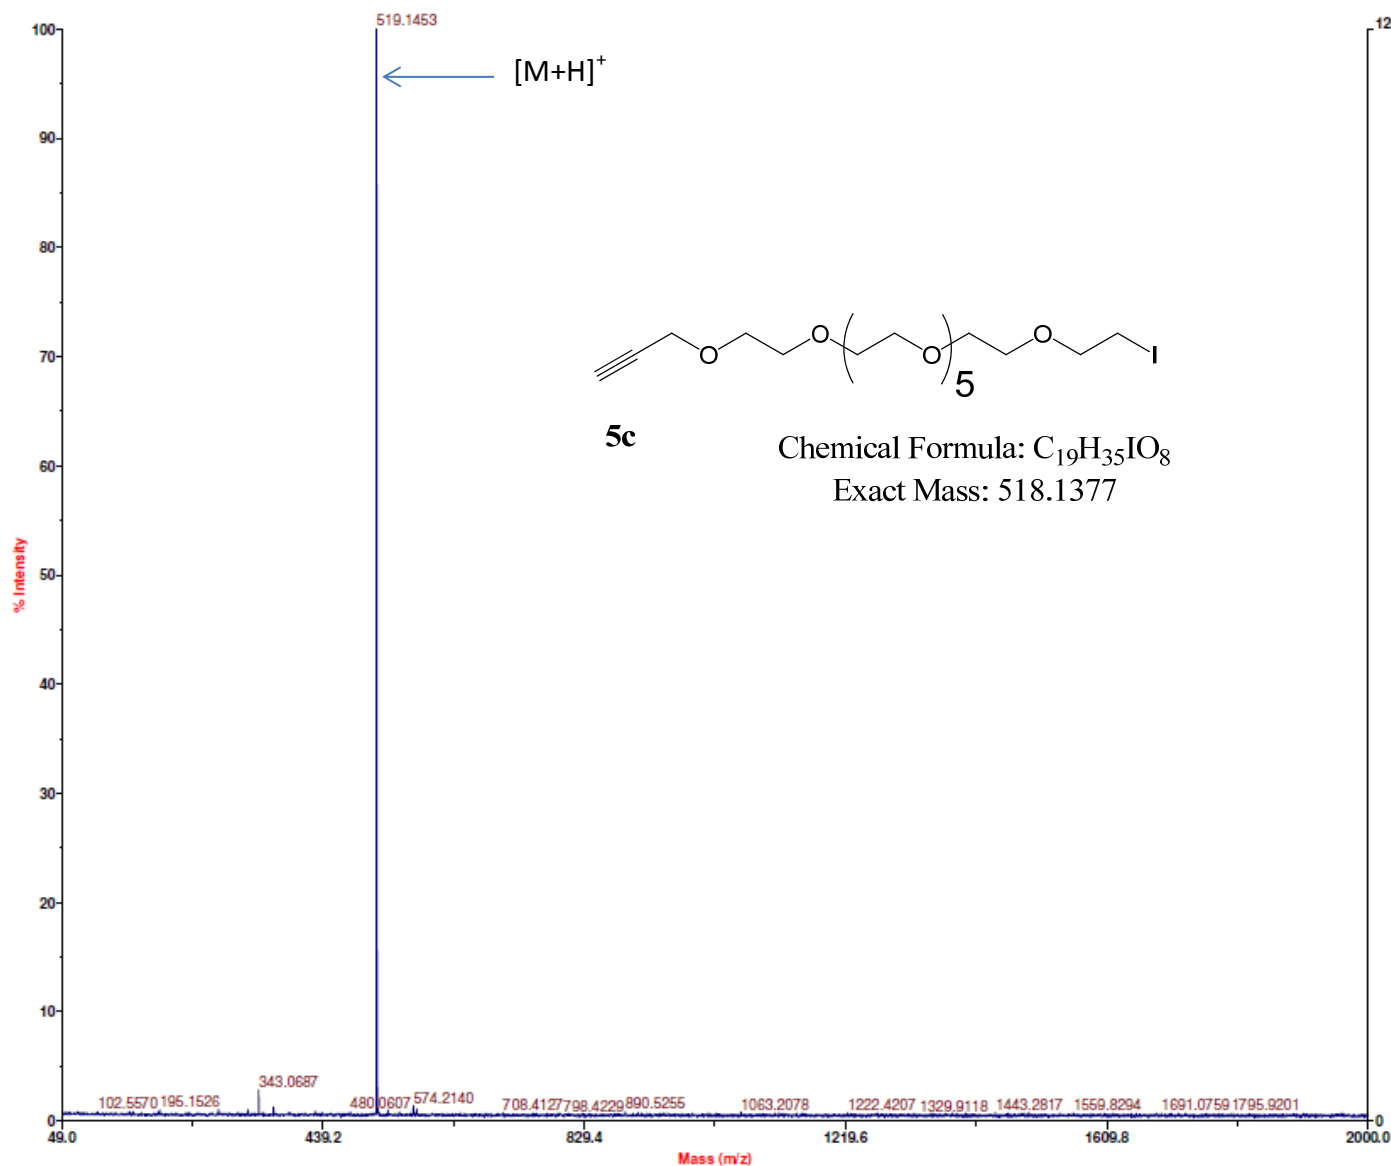

```
--> Mariner System State <--
Instrument State      ON
Ion Polarity         POS
Auxillary Gas        ON
Curtain Gas          ON
Nebulizer Gas        ON
Calibration Constant A  5.0149194E-007
Calibration Constant B  78.267402
TDC Deadtime         10
--> Source Settings <--
Spray Tip Potential   4509.96
SCIEX Heater         300.05
--> API Interface Settings <--
Nozzle Potential     40.04
Skimmer 1 Potential  10.01
Quadrupole DC Potential  5.49
Deflection Voltage   0.10
Einzel Lens Potential -24.00
Quadrupole RF Voltage 999.76
Quadrupole Temperature 140.01
Nozzle Temperature  140.01
--> Analyzer Settings <--
Push Pulse Potential  490.00
Pull Pulse Potential  213.11
Pull Bias Potential   10.00
Acceleration Potential 3999.94
Reflector Potential   1549.99
Detector Voltage      1700.24
--> Spectrum Acquisition Settings <--
Seconds Per Spectrum  1.00
Ion Count Threshold   0.00
First Mass            50.00
Last Mass             2000.00
Accumulate Spectra   OFF
Standby at end of Acquisition OFF
--> Centroid Spectra Settings <--
Centroid Spectra     OFF
--> System Settings <--
Gas Control Mode      Manual
Syringe Pump Mode     Manual
Syringe Pump Rate     80.00
Syringe Diameter      3.26
Min Analyzer Mass     50.00
Max Analyzer Mass     4000.00
```

4.179  
4.173  
3.670  
3.665  
3.655  
3.640  
3.635  
3.624  
3.606  
3.603  
3.601  
3.587  
3.571  
3.554  
3.079  
3.063  
3.047  
2.435  
2.311

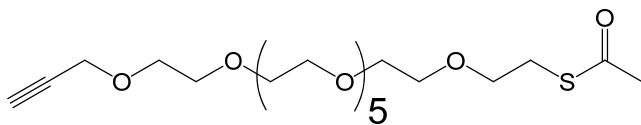

```

NAME      ZH3-141_Alk-P8-Sac
EXPNO     1
PROCNO    1
Date_     20111101
Time      21.04
INSTRUM   spect
PROBHD    5 mm PABBO BB-
PULPROG   zg30
TD         65536
SOLVENT   CDCl3
NS         16
DS         2
SWH        8802.817 Hz
FIDRES     0.134320 Hz
AQ         3.7224948 sec
RG         28.5
DW         56.800 usec
DE         6.50 usec
TE         292.4 K
D1         1.00000000 sec
TD0        1
    
```

```

===== CHANNEL f1 =====
NUC1      1H
P1         14.85 usec
PL1        -0.60 dB
PL1W      13.81451130 W
SFO1      400.1320007 MHz
SI         32768
SF         400.1300000 MHz
WDW        EM
SSB        0
LB         0.30 Hz
GB         0
PC         1.00
    
```

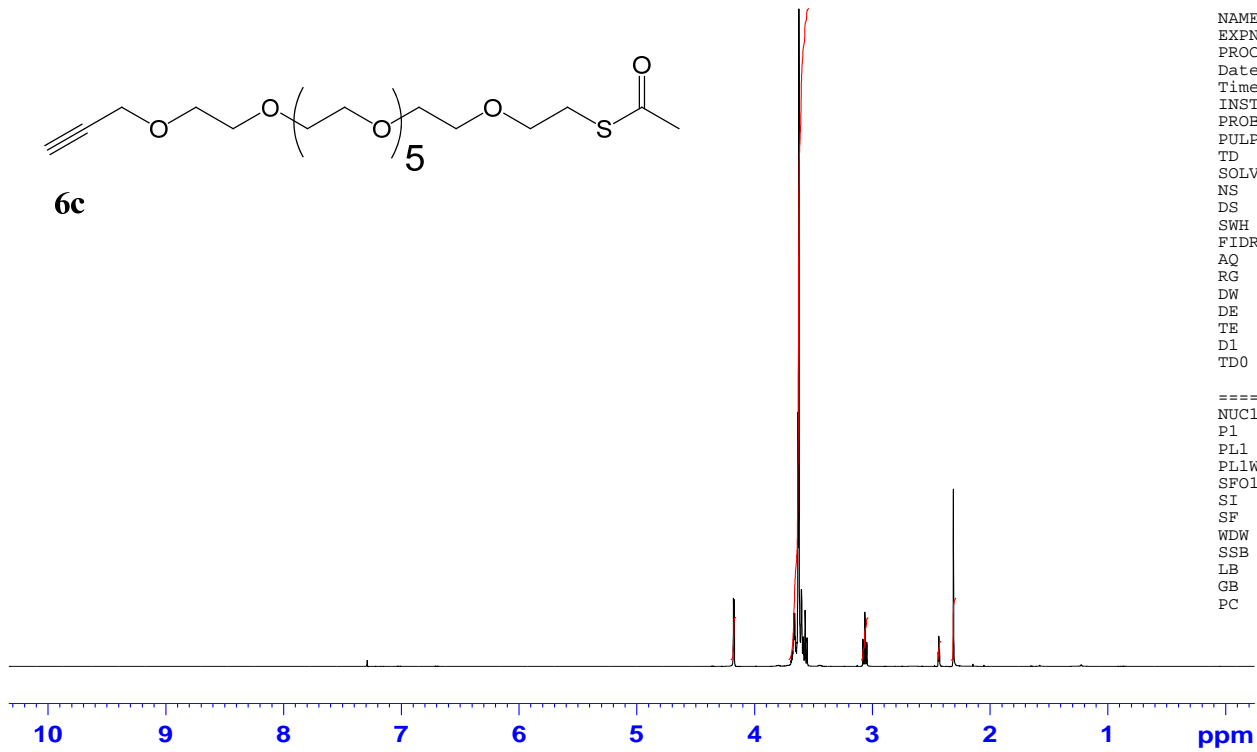

```

NAME      ZH3-141_Alk-P8-Sac
EXPNO     2
PROCNO    1
Date_     20111101
Time      22.05
INSTRUM   spect
PROBHD    5 mm PABBO BB-
PULPROG   zgpg30
TD         65536
SOLVENT   CDCl3
NS         1024
DS         4
SWH        24038.461 Hz
FIDRES     0.366798 Hz
AQ         1.3631988 sec
RG         724
DW         20.800 usec
DE         6.50 usec
TE         294.4 K
D1         2.00000000 sec
D11        0.03000000 sec
TD0        1
    
```

```

===== CHANNEL f1 =====
NUC1      13C
P1         9.99 usec
PL1        -3.00 dB
PL1W      73.67452240 W
SFO1      100.6228298 MHz
    
```

```

===== CHANNEL f2 =====
CPDPRG2   waltz16
NUC2      1H
PCPD2     80.00 usec
PL2        -0.65 dB
PL12      13.40 dB
PL13      13.40 dB
PL2W      13.97447491 W
PL12W     0.54996562 W
PL13W     0.54996562 W
SFO2      400.1316005 MHz
SI         32768
SF         100.6126885 MHz
WDW        EM
SSB        0
LB         1.00 Hz
GB         0
PC         1.40
    
```

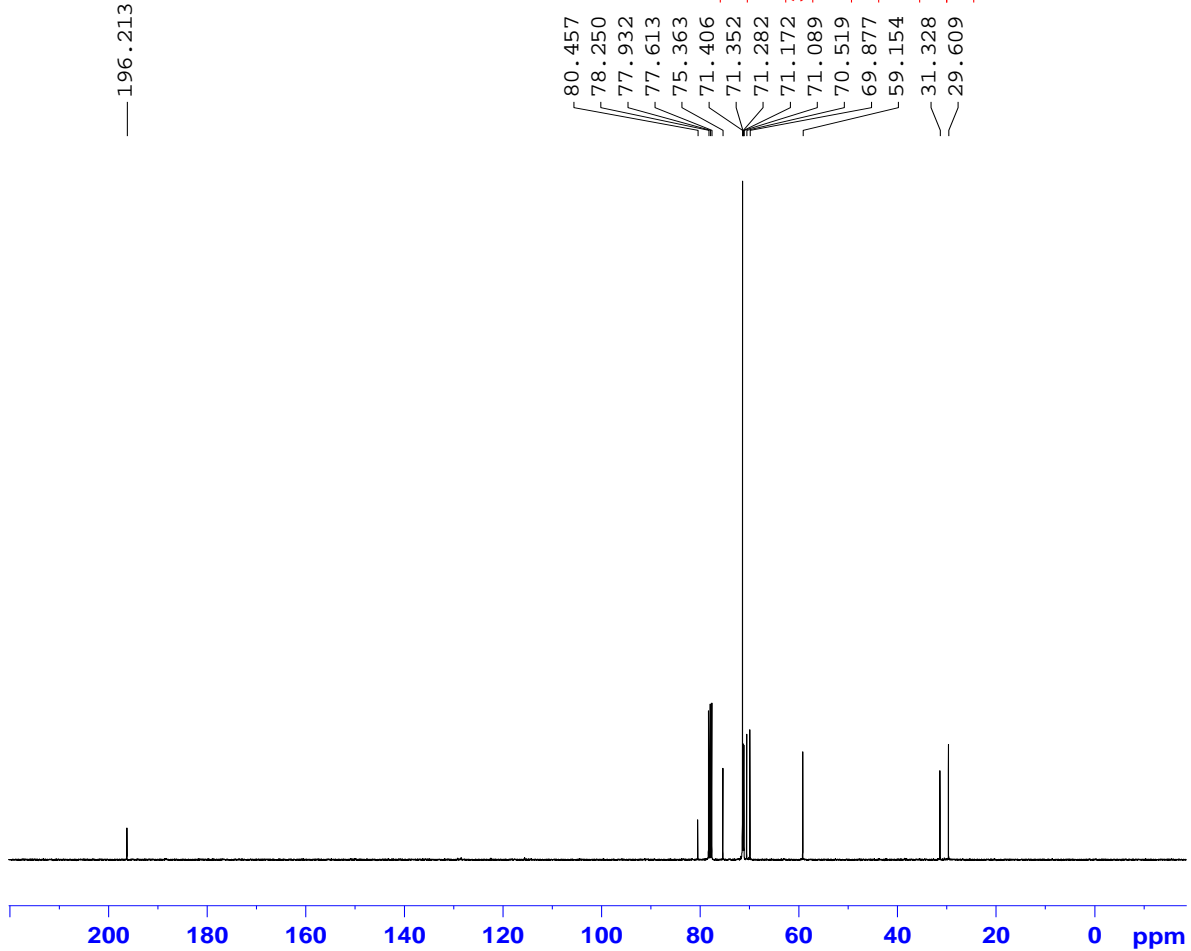

Mariner Spec /1:23 (T/0.00:0.39) ASC[BP = 489.2, 269]

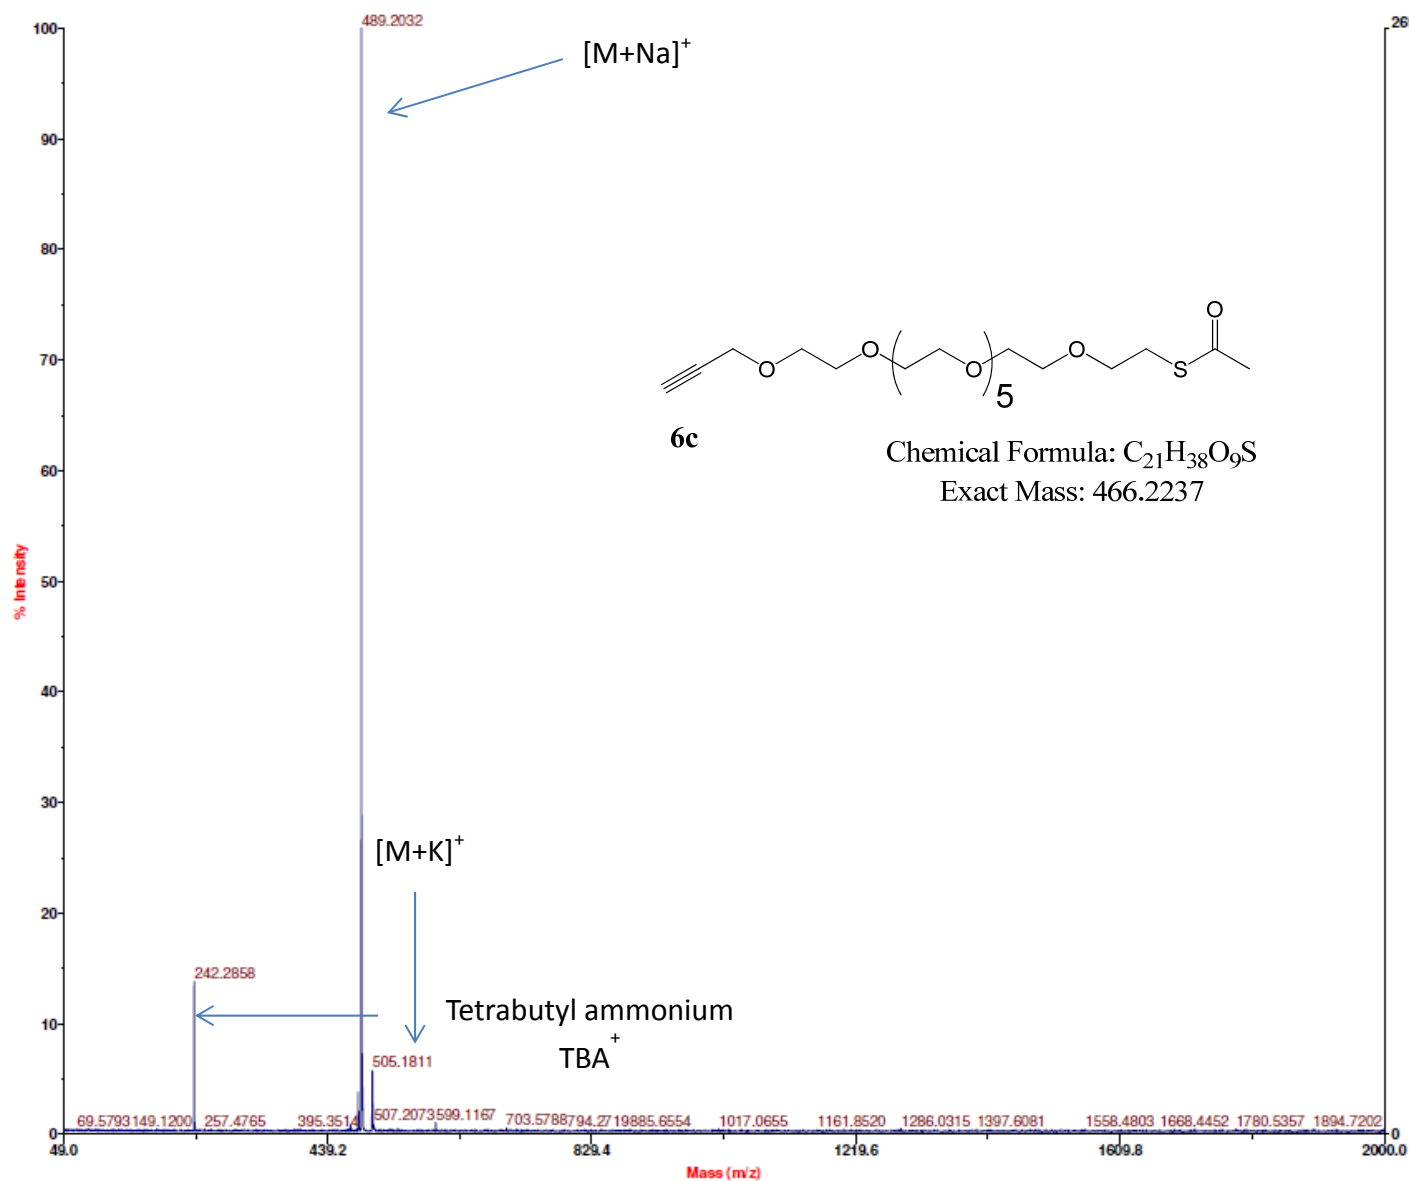

| Parameter                             | Value          |
|---------------------------------------|----------------|
| --> Mariner System State <--          |                |
| Instrument State                      | ON             |
| Ion Polarity                          | POS            |
| Auxiliary Gas                         | ON             |
| Curtain Gas                           | ON             |
| Nebulizer Gas                         | ON             |
| Calibration Constant A                | 5.0146867E-007 |
| Calibration Constant B                | 77.798312      |
| TDC Deadtime                          | 10             |
| --> Source Settings <--               |                |
| Spray Tip Potential                   | 4509.96        |
| SCIEX Heater                          | 300.05         |
| --> API Interface Settings <--        |                |
| Nozzle Potential                      | 40.04          |
| Skimmer 1 Potential                   | 10.01          |
| Quadrupole DC Potential               | 5.49           |
| Deflection Voltage                    | 0.10           |
| Einzel Lens Potential                 | -24.00         |
| Quadrupole RF Voltage                 | 999.76         |
| Quadrupole Temperature                | 140.01         |
| Nozzle Temperature                    | 140.01         |
| --> Analyzer Settings <--             |                |
| Push Pulse Potential                  | 490.00         |
| Pull Pulse Potential                  | 213.11         |
| Pull Bias Potential                   | 10.00          |
| Acceleration Potential                | 3999.94        |
| Reflector Potential                   | 1549.99        |
| Detector Voltage                      | 1700.24        |
| --> Spectrum Acquisition Settings <-- |                |
| Seconds Per Spectrum                  | 1.00           |
| Ion Count Threshold                   | 0.00           |
| First Mass                            | 50.00          |
| Last Mass                             | 2000.00        |
| Accumulate Spectra                    | OFF            |
| Standby at End of Acquisition         | OFF            |
| --> Centroid Spectra Settings <--     |                |
| Centroid Spectra                      | OFF            |
| --> System Settings <--               |                |
| Gas Control Mode                      | Manual         |
| Syringe Pump Mode                     | Manual         |
| Syringe Pump Rate                     | 80.00          |
| Syringe Diameter                      | 3.26           |
| Min Analyzer Mass                     | 50.00          |
| Max Analyzer Mass                     | 4000.00        |

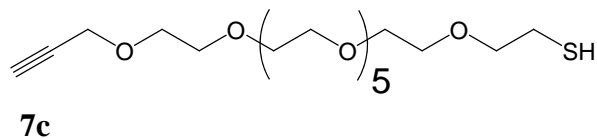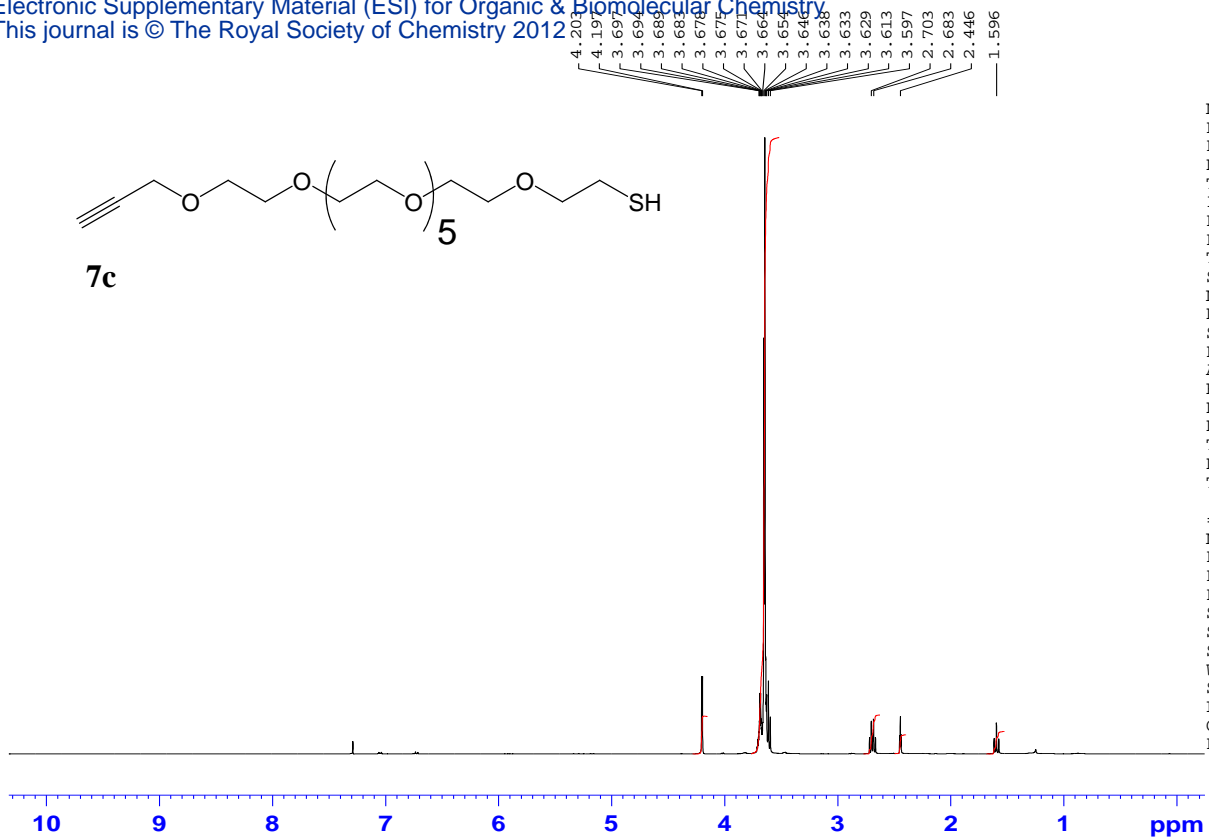

```

NAME      LG-820_Alkyne-P8-SH
EXPNO    1
PROCNO   1
Date_    20111102
Time     18.56
INSTRUM spect
PROBHD   5 mm PABBO BB-
PULPROG zg30
TD       65536
SOLVENT  CDCl3
NS       64
DS       2
SWH      8802.817 Hz
FIDRES   0.134320 Hz
AQ       3.7224948 sec
RG       71.8
DW       56.800 usec
DE       6.50 usec
TE       292.4 K
D1       1.00000000 sec
D10      1
    
```

```

===== CHANNEL f1 =====
NUC1     1H
P1       14.85 usec
PL1      -0.60 dB
PL1W    13.81451130 W
SF01    400.1320007 MHz
SI       32768
SF       400.1300000 MHz
WDW      EM
SSB      0
LB       0.30 Hz
GB       0
PC       1.00
    
```

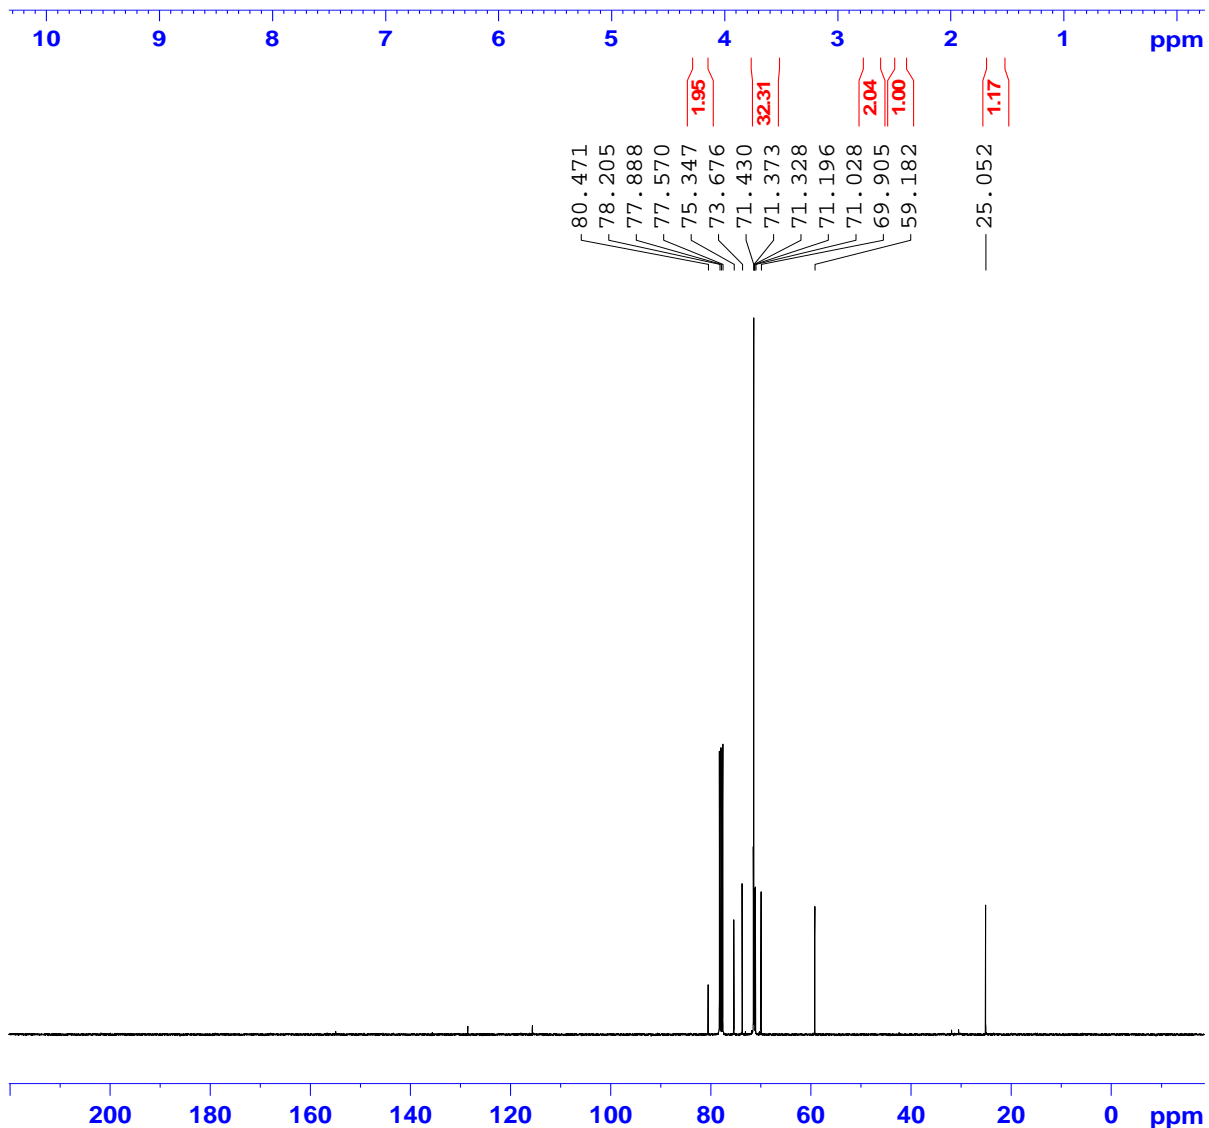

```

NAME      LG-820_Alkyne-P8-SH
EXPNO    2
PROCNO   1
Date_    20111102
Time     22.58
INSTRUM spect
PROBHD   5 mm PABBO BB-
PULPROG zgpg30
TD       65536
SOLVENT  CDCl3
NS       2000
DS       4
SWH      24038.461 Hz
FIDRES   0.366798 Hz
AQ       1.3631988 sec
RG       80.6
DW       20.800 usec
DE       6.50 usec
TE       294.6 K
D1       2.00000000 sec
D11      0.03000000 sec
D10      1
    
```

```

===== CHANNEL f1 =====
NUC1     13C
P1       9.99 usec
PL1      -3.00 dB
PL1W    73.67452240 W
SF01    100.6228298 MHz
    
```

```

===== CHANNEL f2 =====
CPDPRG2  waltz16
NUC2     1H
PCPD2    80.00 usec
PL2      -0.65 dB
PL12     13.40 dB
PL13     13.40 dB
PL2W    13.97447491 W
PL12W   0.54996562 W
PL13W   0.54996562 W
SFO2    400.1316005 MHz
SI       32768
SF       100.6126885 MHz
WDW      EM
SSB      0
LB       1.00 Hz
GB       0
PC       1.40
    
```

Mariner Spec /1:26 (T/0.00:0.45) ASC[BP = 447.2, 531]

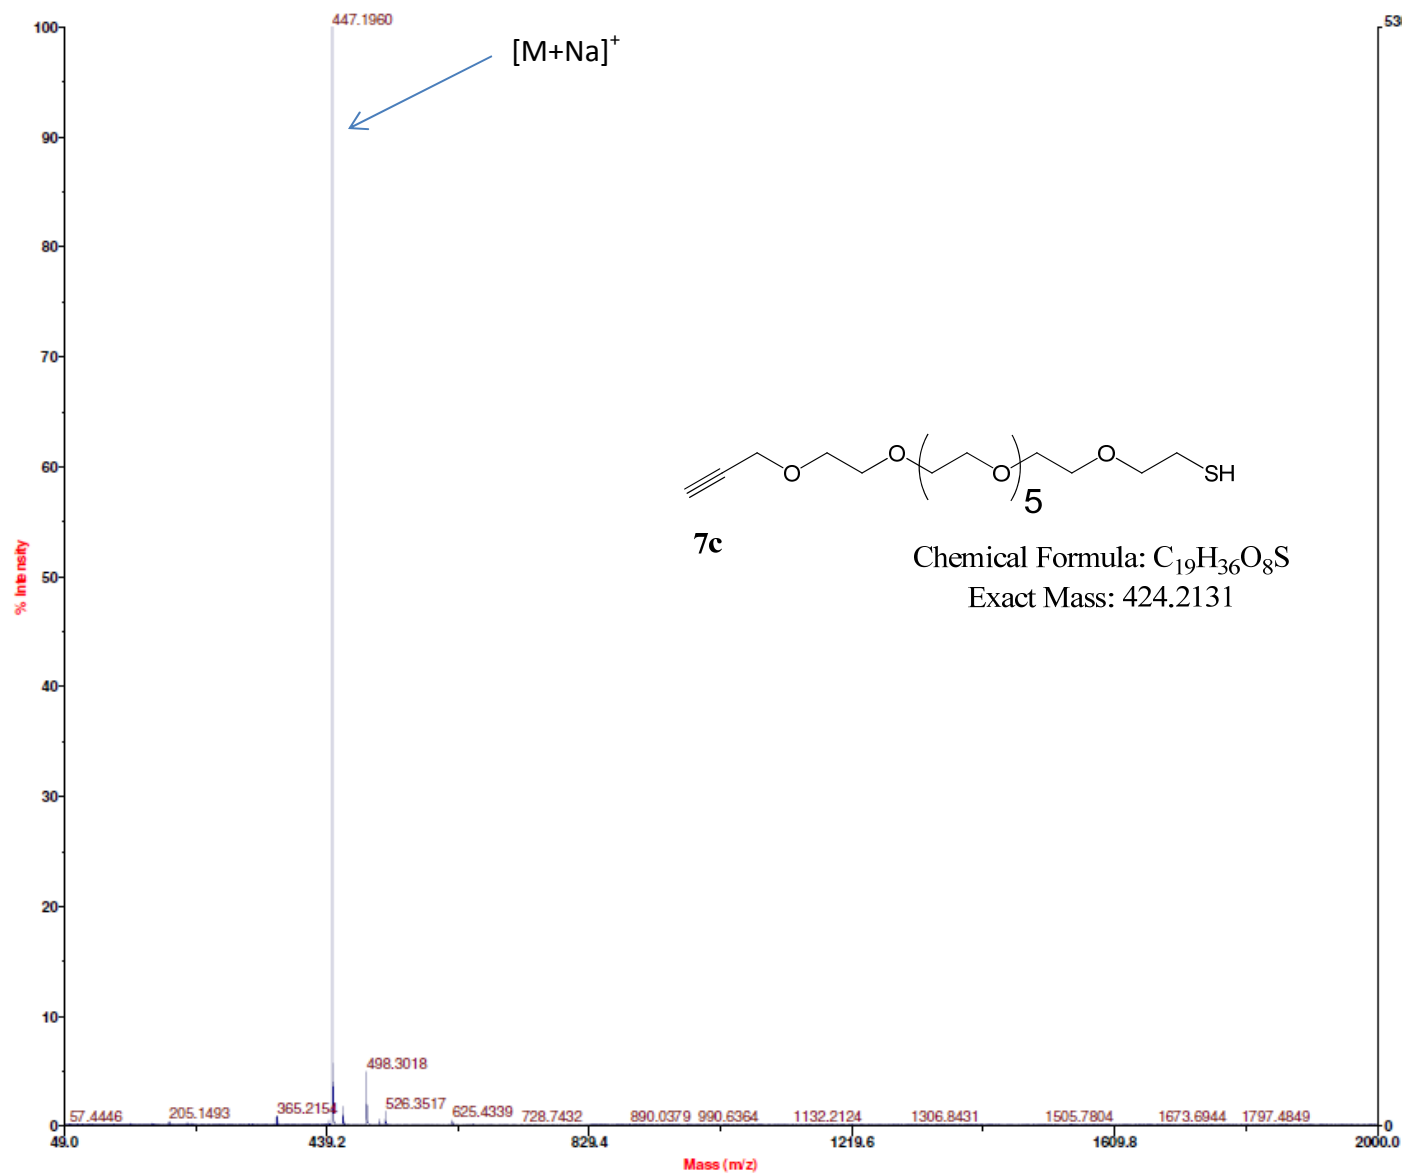

--> Mariner System State <--  
Instrument State ON  
Ion Polarity POS  
Auxiliary Gas ON  
Curtain Gas ON  
Nebulizer Gas ON  
Calibration Constant A 5.0146867E-007  
Calibration Constant B 77.798312  
TDC Deadtime 10  
--> Source Settings <--  
Spray Tip Potential 4509.96  
SCIEX Heater 300.05  
--> API Interface Settings <--  
Nozzle Potential 40.04  
Skimmer 1 Potential 10.01  
Quadrupole DC Potential 5.49  
Deflection Voltage 0.10  
Einzel Lens Potential -24.00  
Quadrupole RF Voltage 999.76  
Quadrupole Temperature 140.01  
Nozzle Temperature 140.01  
--> Analyzer Settings <--  
Push Pulse Potential 490.00  
Pull Pulse Potential 213.11  
Pull Bias Potential 10.00  
Acceleration Potential 3999.94  
Reflector Potential 1549.99  
Detector Voltage 1700.24  
--> Spectrum Acquisition Settings <--  
Seconds Per Spectrum 1.00  
Ion Count Threshold 0.00  
First Mass 50.00  
Last Mass 2000.00  
Accumulate Spectra OFF  
Standby at End of Acquisition OFF  
--> Centroid Spectra Settings <--  
Centroid Spectra OFF  
--> System Settings <--  
Gas Control Mode Manual  
Syringe Pump Mode Manual  
Syringe Pump Rate 100.00  
Syringe Diameter 3.26  
Min Analyzer Mass 50.00  
Max Analyzer Mass 4000.00



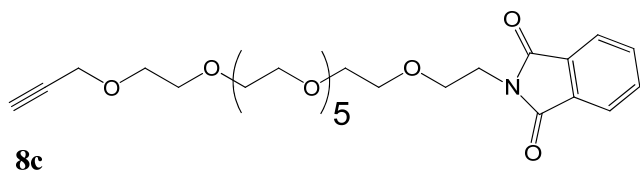

```
NAME      ZH3-048_Alk-P8-NPth
EXPNO     1
PROCNO    1
Date_     20110601
Time      13.16
INSTRUM   spect
PROBHD    5 mm PABBO BB-
PULPROG   zg30
TD        65536
SOLVENT   CDCl3
NS        16
DS        2
SWH       8802.817 Hz
FIDRES    0.134320 Hz
AQ        3.7224948 sec
RG        228
DW        56.800 usec
DE        6.50 usec
TE        292.9 K
D1        1.00000000 sec
TD0       1
```

```
===== CHANNEL f1 =====
NUC1      1H
P1        14.85 usec
PL1       -0.60 dB
PL1W      13.81451130 W
SFO1      400.1320007 MHz
SI        32768
SF        400.1300000 MHz
WDW       EM
SSB       0
LB        0.30 Hz
GB        0
PC        1.00
```

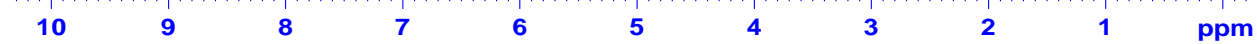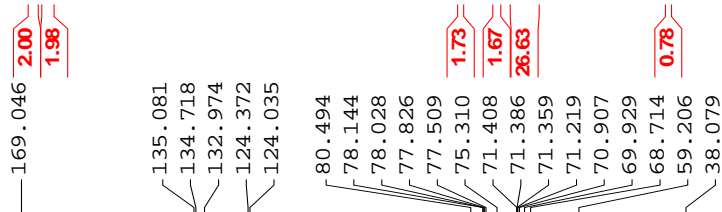

```
NAME      ZH3-048_Alk-P8-NPth
EXPNO     2
PROCNO    1
Date_     20110601
Time      23.01
INSTRUM   spect
PROBHD    5 mm PABBO BB-
PULPROG   zgpg30
TD        65536
SOLVENT   CDCl3
NS        2048
DS        4
SWH       24038.461 Hz
FIDRES    0.366798 Hz
AQ        1.3631988 sec
RG        80.6
DW        20.800 usec
DE        6.50 usec
TE        294.6 K
D1        2.00000000 sec
D11       0.03000000 sec
TD0       1
```

```
===== CHANNEL f1 =====
NUC1      13C
P1        9.99 usec
PL1       -3.00 dB
PL1W      73.67452240 W
SFO1      100.6228298 MHz
```

```
===== CHANNEL f2 =====
CPDPRG2   waltz16
NUC2      1H
PCPD2     80.00 usec
PL2       -0.65 dB
PL12      13.40 dB
PL13      13.40 dB
PL2W      13.97447491 W
PL12W     0.54996562 W
PL13W     0.54996562 W
SFO2      400.1316005 MHz
SI        32768
SF        100.6126885 MHz
WDW       EM
SSB       0
LB        1.00 Hz
GB        0
PC        1.40
```

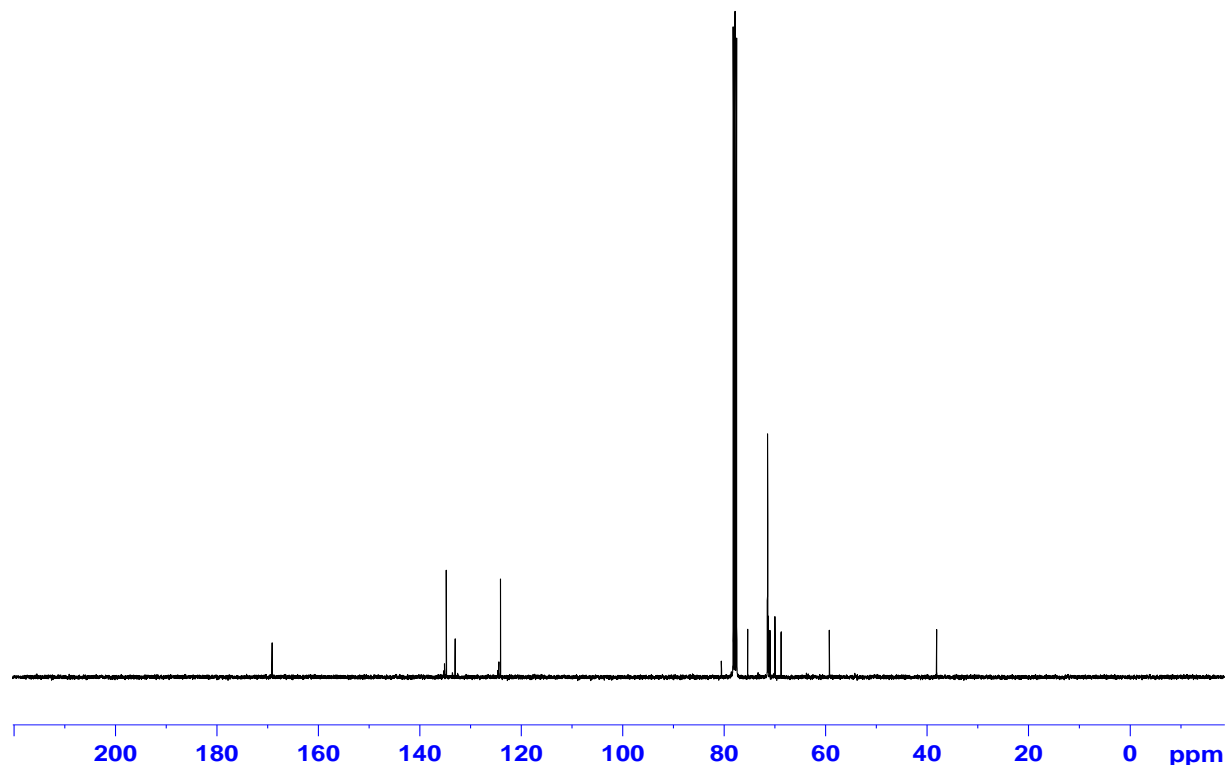

Mariner Spec /1:26 (T /0.00:0.44) ASC[BP = 576.3, 238]

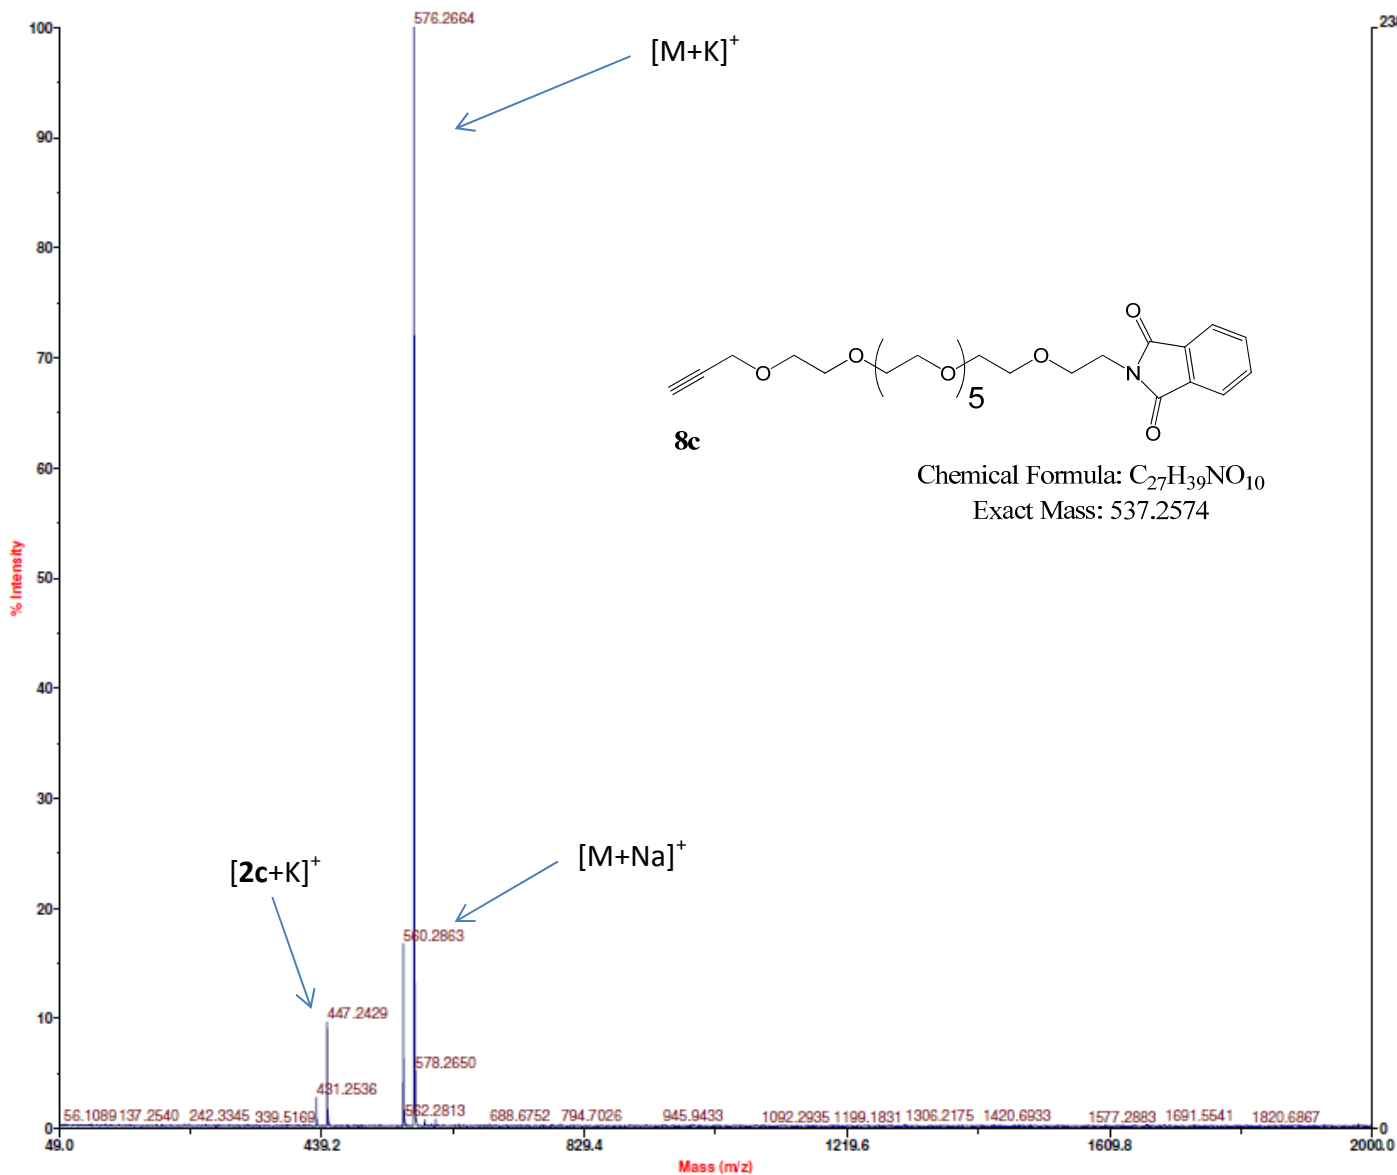

| --> Mariner System State <--          |                |
|---------------------------------------|----------------|
| Instrument State                      | ON             |
| Ion Polarity                          | POS            |
| Auxiliary Gas                         | ON             |
| Curtain Gas                           | ON             |
| Nebulizer Gas                         | ON             |
| Calibration Constant A                | 5.0174991E-007 |
| Calibration Constant B                | 78.221559      |
| TDC Deadtime                          | 10             |
| --> Source Settings <--               |                |
| Spray Tip Potential                   | 4509.96        |
| SCIEX Heater                          | 300.05         |
| --> API Interface Settings <--        |                |
| Nozzle Potential                      | 120.12         |
| Skimmer 1 Potential                   | 10.01          |
| Quadrupole DC Potential               | 5.49           |
| Deflection Voltage                    | 0.10           |
| Einzel Lens Potential                 | -24.00         |
| Quadrupole RF Voltage                 | 999.76         |
| Quadrupole Temperature                | 140.01         |
| Nozzle Temperature                    | 140.01         |
| --> Analyzer Settings <--             |                |
| Push Pulse Potential                  | 490.00         |
| Pull Pulse Potential                  | 213.11         |
| Pull Bias Potential                   | 10.00          |
| Acceleration Potential                | 3999.94        |
| Reflector Potential                   | 1549.99        |
| Detector Voltage                      | 1700.24        |
| --> Spectrum Acquisition Settings <-- |                |
| Seconds Per Spectrum                  | 1.00           |
| Ion Count Threshold                   | 0.00           |
| First Mass                            | 50.00          |
| Last Mass                             | 2000.00        |
| Accumulate Spectra                    | OFF            |
| Standby at End of Acquisition         | OFF            |
| --> Centroid Spectra Settings <--     |                |
| Centroid Spectra                      | OFF            |
| --> System Settings <--               |                |
| Gas Control Mode                      | Manual         |
| Syringe Pump Mode                     | Manual         |
| Syringe Pump Rate                     | 50.00          |
| Syringe Diameter                      | 3.26           |
| Min Analyzer Mass                     | 50.00          |
| Max Analyzer Mass                     | 4000.00        |

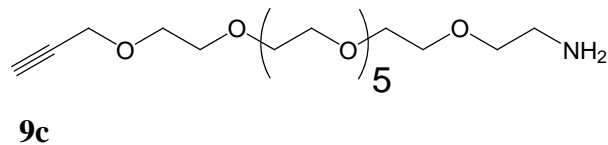

```

NAME      ZH3-061_Alk-P8-NH2
EXPNO     1
PROCNO    1
Date_     20110616
Time      21.44
INSTRUM   spect
PROBHD    5 mm PABBO BB-
PULPROG   zg30
TD        65536
SOLVENT   CDC13
NS        16
DS        2
SWH       8802.817 Hz
FIDRES    0.134320 Hz
AQ        3.7224948 sec
RG        161
DW        56.800 usec
DE        6.50 usec
TE        292.8 K
D1        1.00000000 sec
TD0       1
    
```

```

===== CHANNEL f1 =====
NUC1      1H
P1        14.85 usec
PL1       -0.60 dB
PL1W      13.81451130 W
SFO1      400.1320007 MHz
SI        32768
SF        400.1300000 MHz
WDW       EM
SSB       0
LB        0.30 Hz
GB        0
PC        1.00
    
```

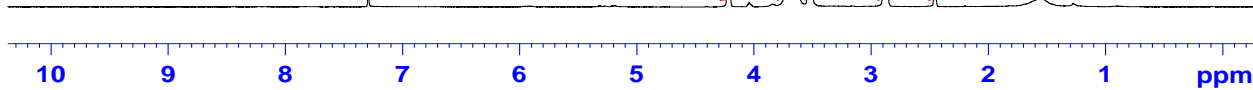

Integration values for the 1H NMR spectrum:

- 1.85
- 30.06
- 2.27
- 1.94
- 0.88

Peak chemical shifts (ppm) for the 1H NMR spectrum:

- 80.487
- 78.146
- 77.828
- 77.511
- 75.310
- 74.297
- 71.397
- 71.224
- 71.115
- 69.928
- 59.206
- 42.645

```

NAME      ZH3-061_Alk-P8-NH2
EXPNO     2
PROCNO    1
Date_     20110616
Time      22.45
INSTRUM   spect
PROBHD    5 mm PABBO BB-
PULPROG   zgpg30
TD        65536
SOLVENT   CDC13
NS        1024
DS        4
SWH       24038.461 Hz
FIDRES    0.366798 Hz
AQ        1.3631988 sec
RG        812
DW        20.800 usec
DE        6.50 usec
TE        294.5 K
D1        2.00000000 sec
D11       0.03000000 sec
TD0       1
    
```

```

===== CHANNEL f1 =====
NUC1      13C
P1        9.99 usec
PL1       -3.00 dB
PL1W      73.67452240 W
SFO1      100.6228298 MHz
    
```

```

===== CHANNEL f2 =====
CPDPRG2   waltz16
NUC2      1H
PCPD2     80.00 usec
PL2       -0.65 dB
PL12      13.40 dB
PL13      13.40 dB
PL2W      13.97447491 W
PL12W     0.54996562 W
PL13W     0.54996562 W
SFO2      400.1316005 MHz
SI        32768
SF        100.6126885 MHz
WDW       EM
SSB       0
LB        1.00 Hz
GB        0
PC        1.40
    
```

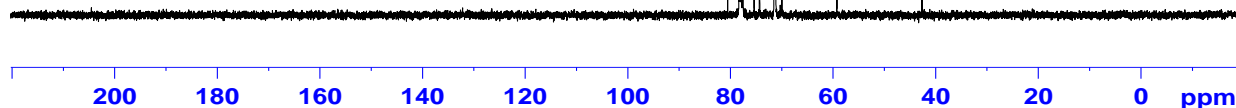

Mariner Spec /1:23 (T/0.00:0.39) ASC[BP = 408.2, 492]

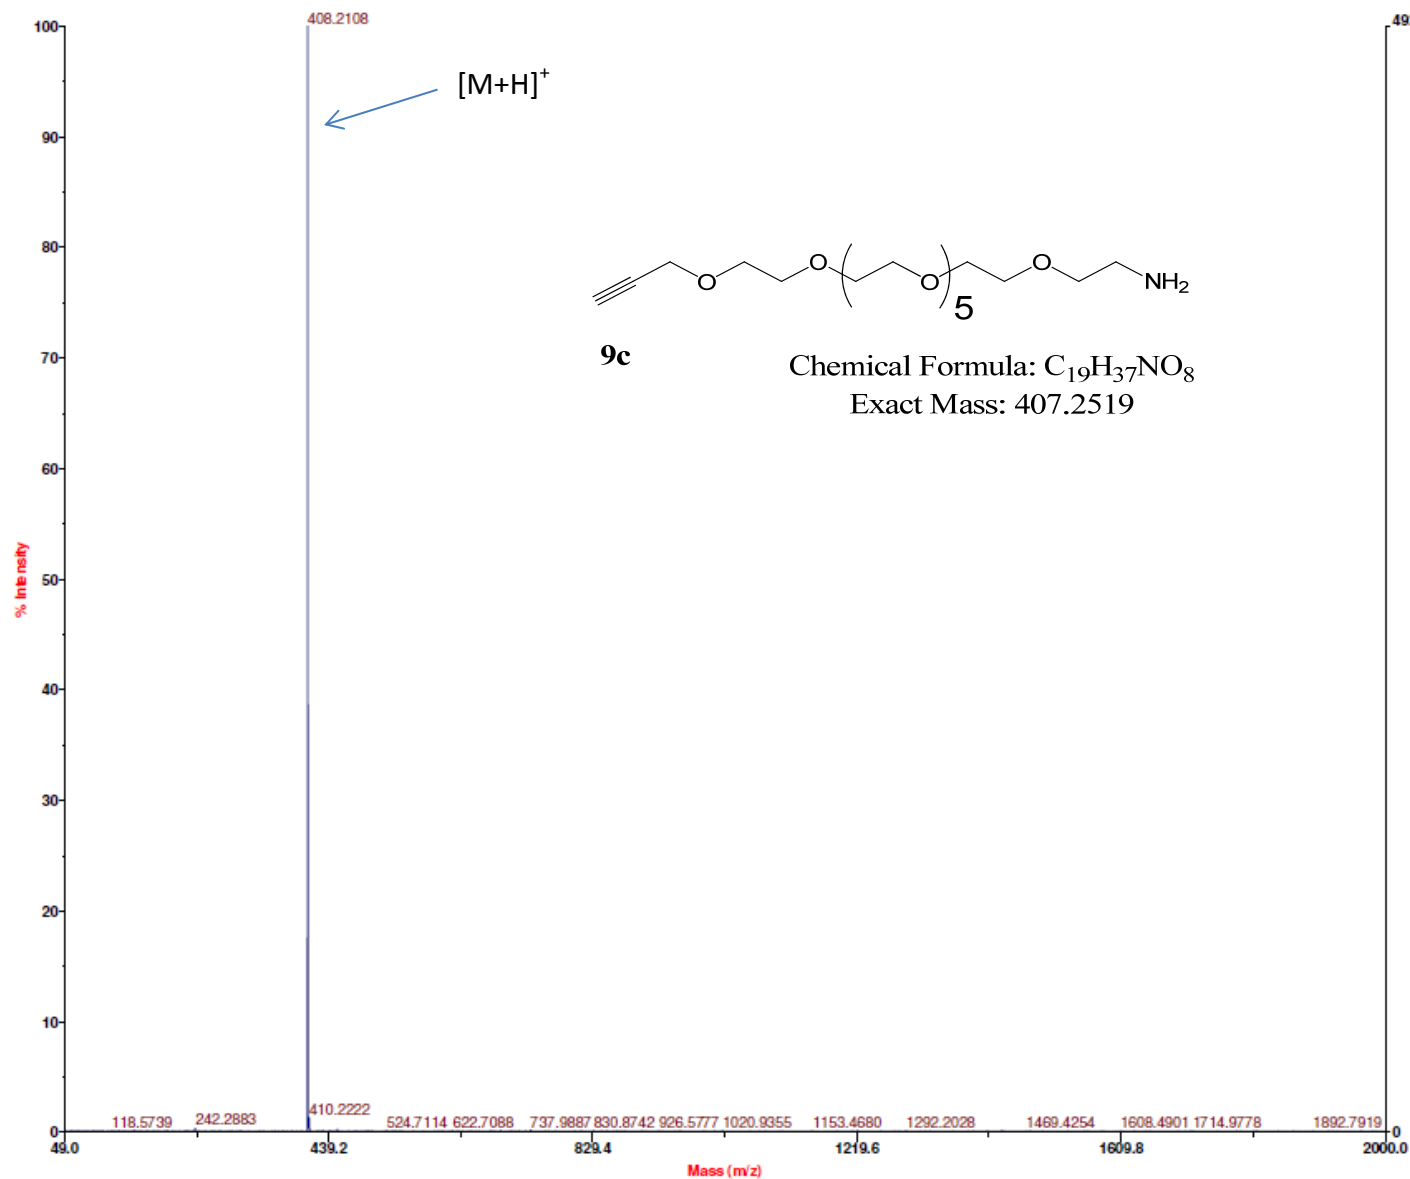

```
--> Mariner System State <--
Instrument State      ON
Ion Polarity         POS
Auxiliary Gas        ON
Curtain Gas          ON
Nebulizer Gas        ON
Calibration Constant A  5.0126144E-007
Calibration Constant B  71.956893
TDC Deadtime         10
--> Source Settings <--
Spray Tip Potential   4509.96
SCIEX Heater          300.05
--> API Interface Settings <--
Nozzle Potential      149.90
Skimmer 1 Potential   10.01
Quadrupole DC Potential 5.49
Deflection Voltage     0.10
Einzel Lens Potential -24.00
Quadrupole RF Voltage  999.76
Quadrupole Temperature 140.01
Nozzle Temperature    140.01
--> Analyzer Settings <--
Push Pulse Potential   490.00
Pull Pulse Potential   213.11
Pull Bias Potential     10.00
Acceleration Potential 3999.94
Reflector Potential    1549.99
Detector Voltage       1700.24
--> Spectrum Acquisition Settings <--
Seconds Per Spectrum   1.00
Ion Count Threshold    0.00
First Mass              50.00
Last Mass               2000.00
Accumulate Spectra     OFF
Standby at End of Acquisition OFF
--> Centroid Spectra Settings <--
Centroid Spectra      OFF
--> System Settings <--
Gas Control Mode       Manual
Syringe Pump Mode      Manual
Syringe Pump Rate      50.00
Syringe Diameter        3.26
Min Analyzer Mass       50.00
Max Analyzer Mass       4000.00
```

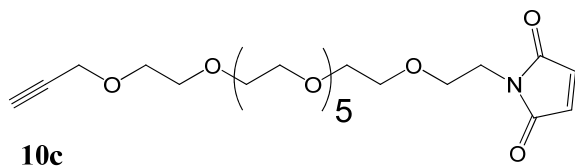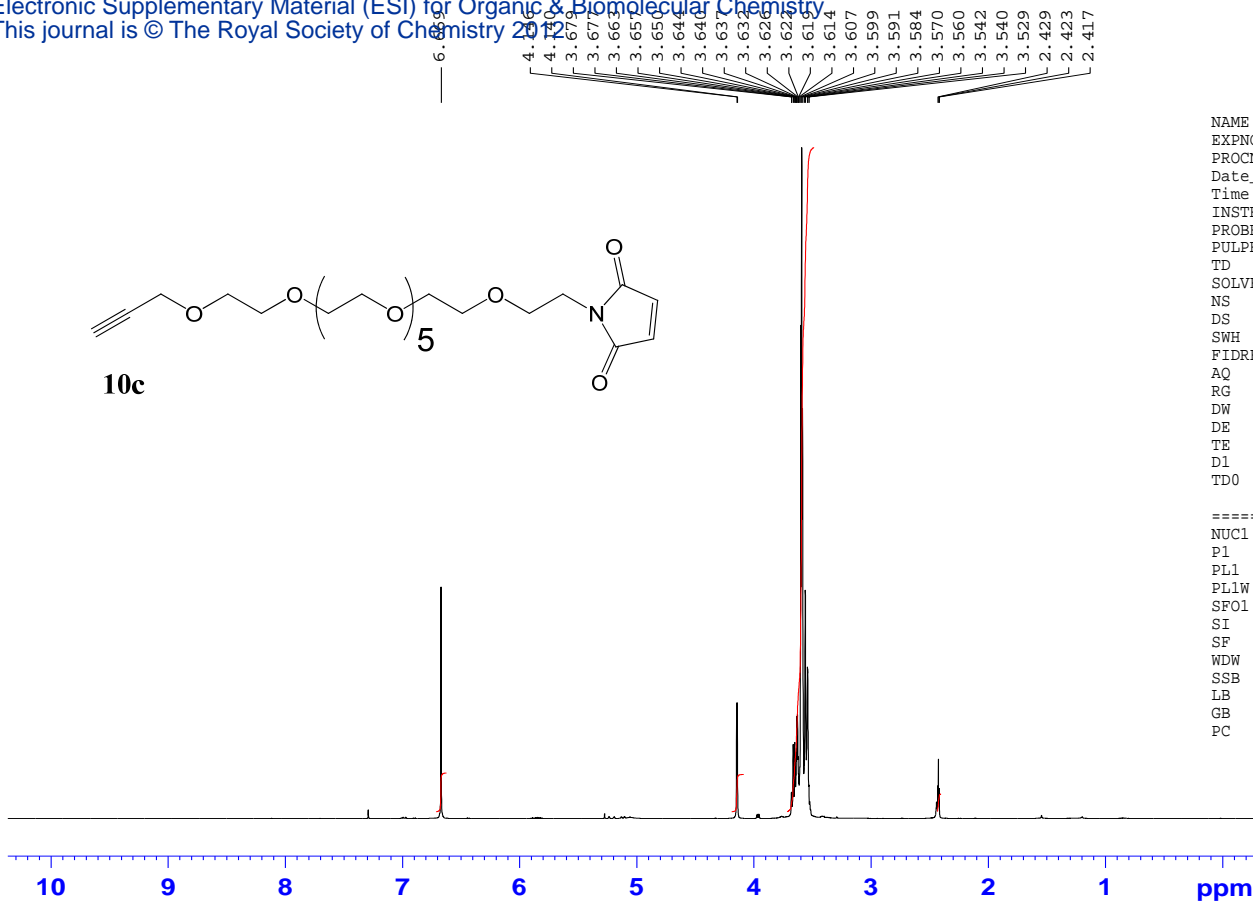

```

NAME      LG-725_Alkyne-P8-Maleimide
EXPNO     1
PROCNO    1
Date_     20110624
Time      12.35
INSTRUM   spect
PROBHD    5 mm PABBO BB-
PULPROG   zg30
TD         65536
SOLVENT   CDCl3
NS         16
DS         2
SWH       8802.817 Hz
FIDRES    0.134320 Hz
AQ         3.7224948 sec
RG         22.6
DW         56.800 usec
DE         6.50 usec
TE         292.5 K
D1         1.00000000 sec
TD0        1
    
```

```

===== CHANNEL f1 =====
NUC1      1H
P1         14.85 usec
PL1       -0.60 dB
PL1W      13.81451130 W
SFO1      400.1320007 MHz
SI         32768
SF         400.1300000 MHz
WDW        EM
SSB         0
LB         0.30 Hz
GB         0
PC         1.00
    
```

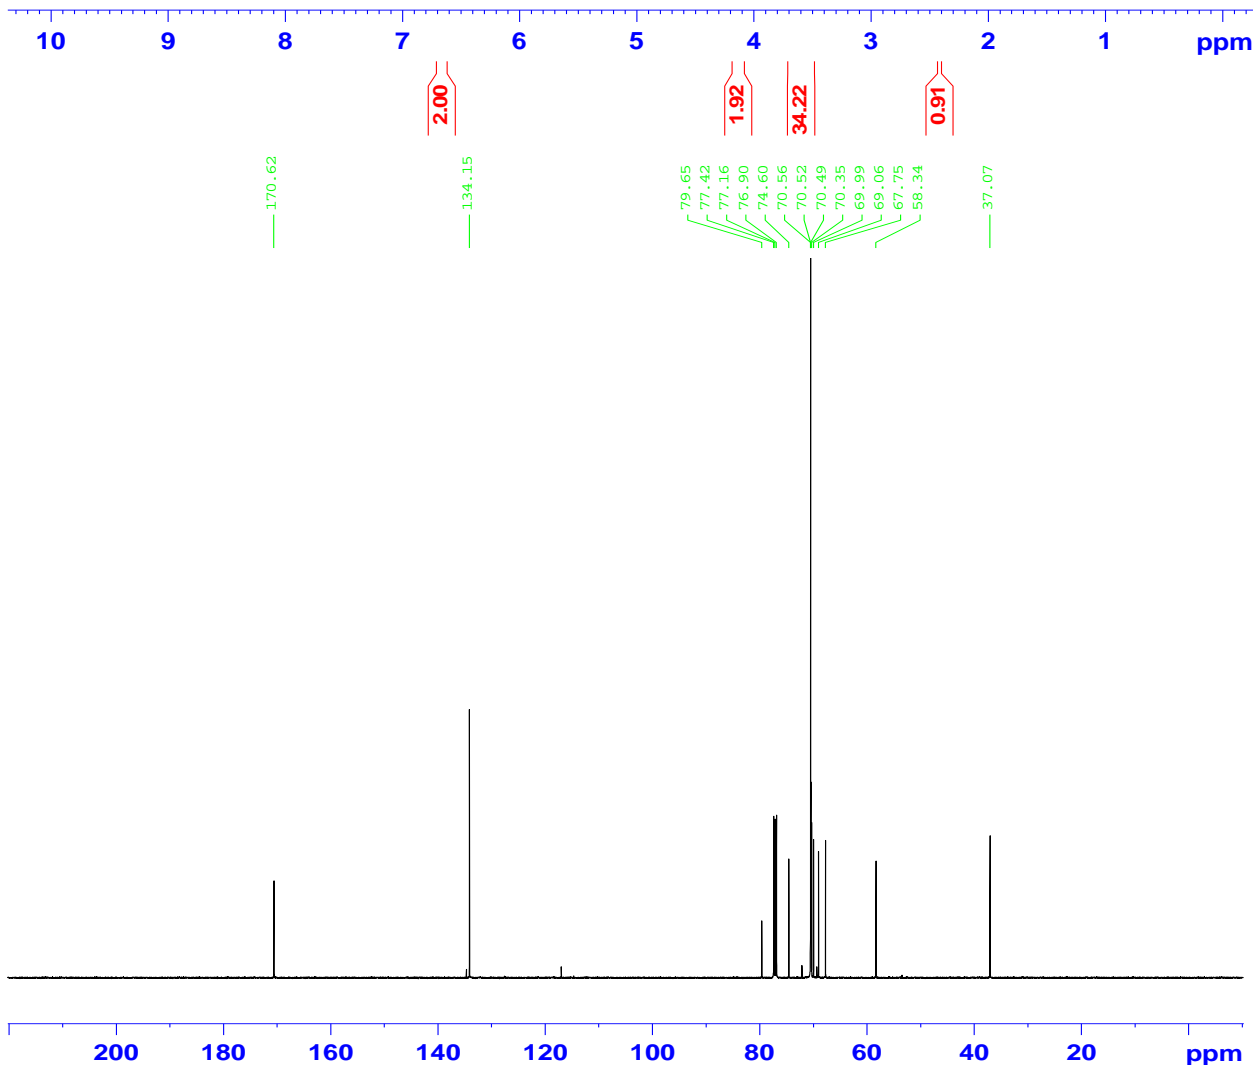

```

NAME      LG-725_Alkyne-P8-Maleimide
EXPNO     2
PROCNO    1
Date_     20111229
Time      14.04
INSTRUM   spect
PROBHD    5 mm PABBO BB-
PULPROG   zgpg30
TD         65536
SOLVENT   CDCl3
NS         1024
DS         4
SWH       28985.508 Hz
FIDRES    0.442284 Hz
AQ         1.1305633 sec
RG         4096
DW         17.250 usec
DE         6.50 usec
TE         296.5 K
D1         2.00000000 sec
D11        0.03000000 sec
TD0        1
    
```

```

===== CHANNEL f1 =====
NUC1      13C
P1         8.83 usec
PL1        0.00 dB
PL1W      80.88274384 W
SFO1      125.7709936 MHz
    
```

```

===== CHANNEL f2 =====
CPDPRG2   waltz16
NUC2      1H
PCPD2     80.00 usec
PL2        1.20 dB
PL12      15.40 dB
PL13      15.40 dB
PL2W      17.72078514 W
PL12W     0.67372549 W
PL13W     0.67372549 W
SFO2      500.1320005 MHz
SI         32768
SF         125.7577890 MHz
WDW        EM
SSB         0
LB         1.00 Hz
GB         0
PC         1.40
    
```

## Applied Biosystems Mariner System 5268

Mariner Spec /1:29 (T/0.00:0.50) ASC[BP = 510.3, 123]

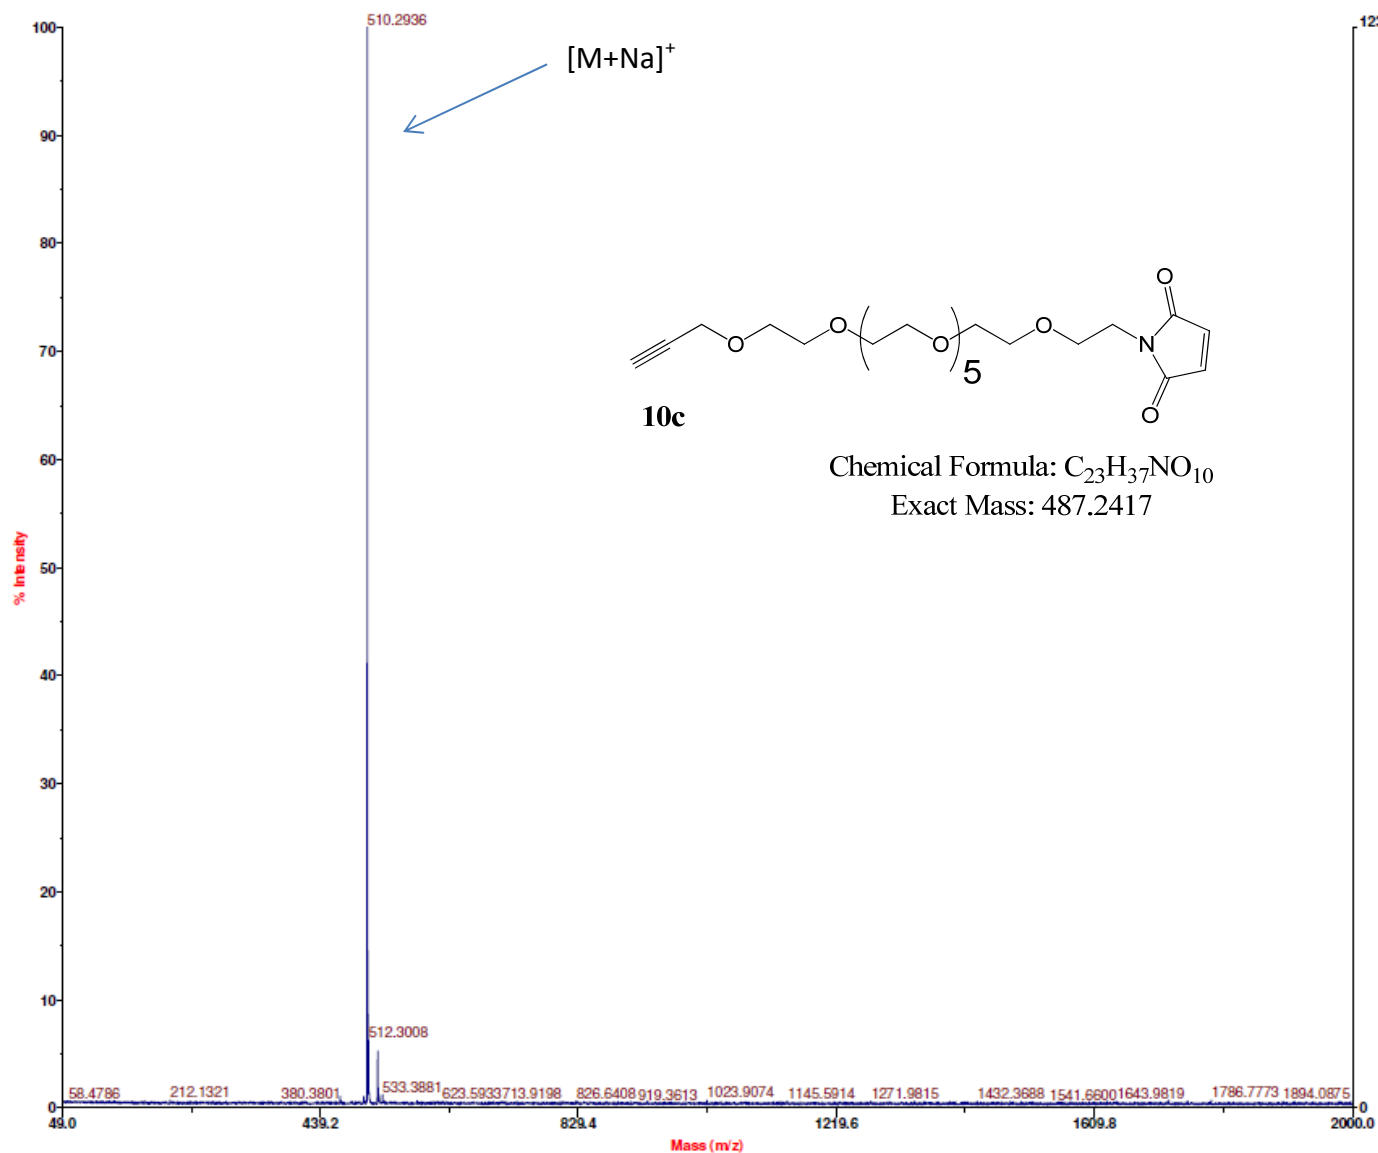

```
--> Mariner System State <--
Instrument State      ON
Ion Polarity         POS
Auxillary Gas        ON
Curtain Gas          ON
Nebulizer Gas        ON
Calibration Constant A  5.0174991E-007
Calibration Constant B  78.221559
TDC Deadtime         10
--> Source Settings <--
Spray Tip Potential   4509.96
SCIEX Heater         300.05
--> API Interface Settings <--
Nozzle Potential     40.04
Skimmer 1 Potential  10.01
Quadrupole DC Potential  5.49
Deflection Voltage   0.10
Einzel Lens Potential -24.00
Quadrupole RF Voltage 999.76
Quadrupole Temperature 140.01
Nozzle Temperature  140.01
--> Analyzer Settings <--
Push Pulse Potential  490.00
Pull Pulse Potential  213.11
Pull Bias Potential   10.00
Acceleration Potential 3999.94
Reflector Potential   1549.99
Detector Voltage      1700.24
--> Spectrum Acquisition Settings <--
Seconds Per Spectrum  1.00
Ion Count Threshold   0.00
First Mass            50.00
Last Mass             2000.00
Accumulate Spectra   OFF
Standby at End of Acquisition OFF
--> Centroid Spectra Settings <--
Centroid Spectra     OFF
--> System Settings <--
Gas Control Mode     Manual
Syringe Pump Mode    Manual
Syringe Pump Rate    50.00
Syringe Diameter     3.26
Min Analyzer Mass    50.00
Max Analyzer Mass    4000.00
```

Acquired: Jun 24 15:09:00 2011  
Mariner Mass Spectrum  
C:\Mariner\Data\2011\Jun\24 Fri\LNG-725001.dat

Printed: 15:10, June 24, 2011

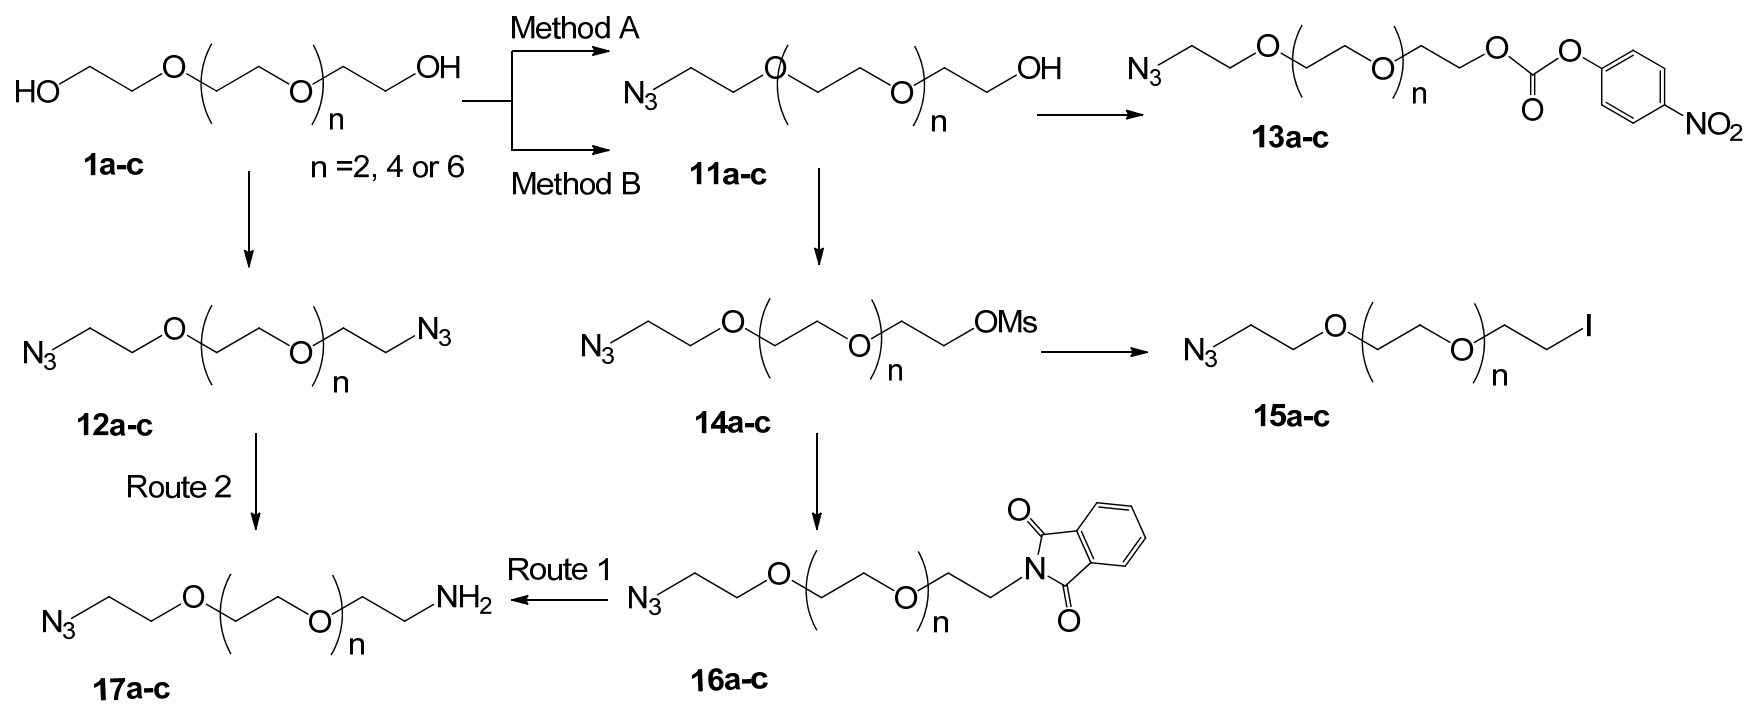

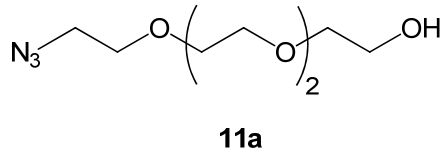

```

NAME      ZH3-123-P_N3-P4-OH
EXPNO     1
PROCNO    1
Date_     20111010
Time      21.04
INSTRUM   spect
PROBHD    5 mm PABBO BB-
PULPROG   zg30
TD        65536
SOLVENT   CDCl3
NS        16
DS        2
SWH       8802.817 Hz
FIDRES    0.134320 Hz
AQ        3.7224948 sec
RG        18
DW        56.800 usec
DE        6.50 usec
TE        292.6 K
D1        1.00000000 sec
TD0       1
    
```

```

===== CHANNEL f1 =====
NUC1      1H
P1        14.85 usec
PL1       -0.60 dB
PL1W      13.81451130 W
SFO1      400.1320007 MHz
SI        32768
SF        400.1300000 MHz
WDW       EM
SSB       0
LB        0.30 Hz
GB        0
PC        1.00
    
```

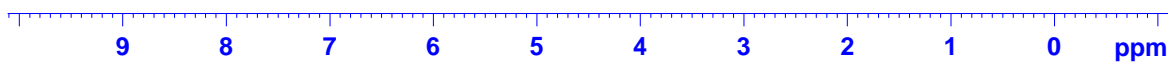

```

NAME      ZH3-123-P_N3-P4-OH
EXPNO     2
PROCNO    1
Date_     20111010
Time      22.05
INSTRUM   spect
PROBHD    5 mm PABBO BB-
PULPROG   zgpg30
TD        65536
SOLVENT   CDCl3
NS        1024
DS        4
SWH       24038.461 Hz
FIDRES    0.366798 Hz
AQ        1.3631988 sec
RG        812
DW        20.800 usec
DE        6.50 usec
TE        294.4 K
D1        2.00000000 sec
D11       0.03000000 sec
TD0       1
    
```

```

===== CHANNEL f1 =====
NUC1      13C
P1        9.99 usec
PL1       -3.00 dB
PL1W      73.67452240 W
SFO1      100.6228298 MHz
    
```

```

===== CHANNEL f2 =====
CPDPRG2   waltz16
NUC2      1H
PCPD2     80.00 usec
PL2       -0.65 dB
PL12      13.40 dB
PL13      13.40 dB
PL2W      13.97447491 W
PL12W     0.54996562 W
PL13W     0.54996562 W
SFO2      400.1316005 MHz
SI        32768
SF        100.6126885 MHz
WDW       EM
SSB       0
LB        1.00 Hz
GB        0
PC        1.40
    
```

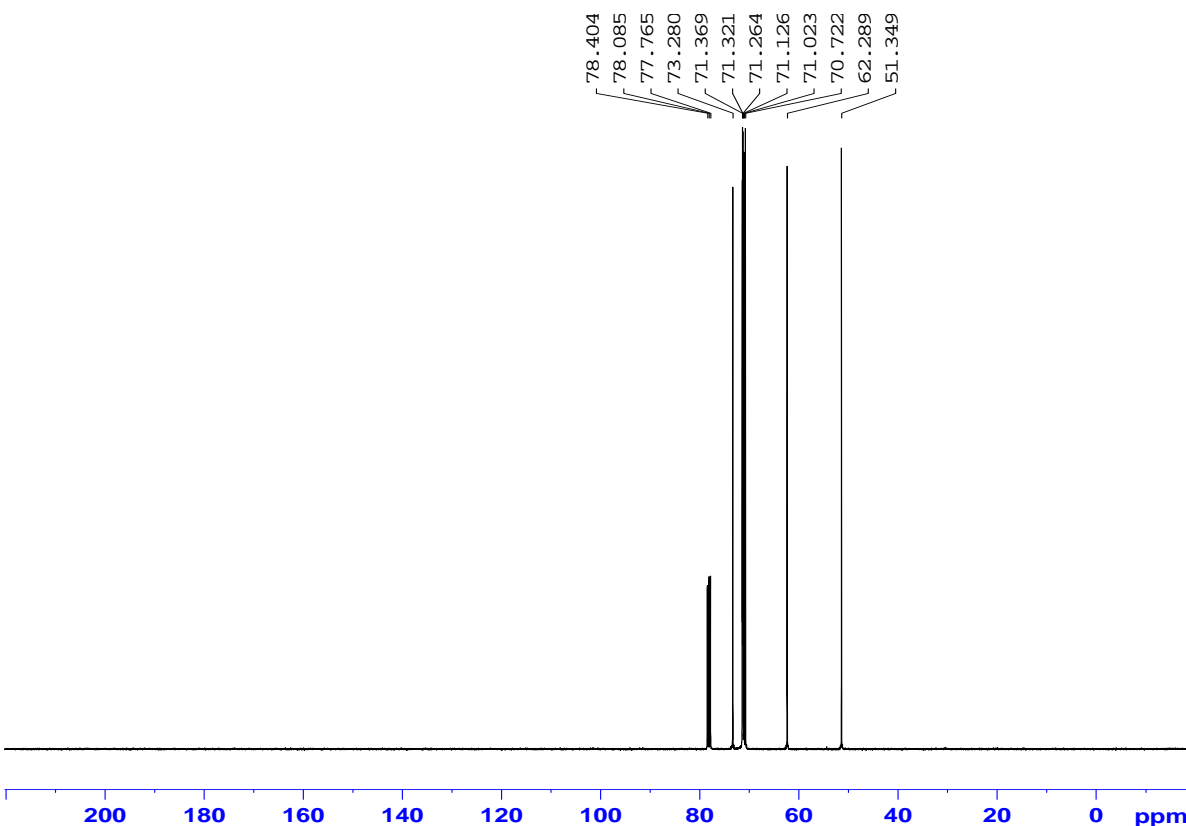



Mariner Spec /1:46 (T/0.00:0.81) ASC[BP = 242.1, 5275]

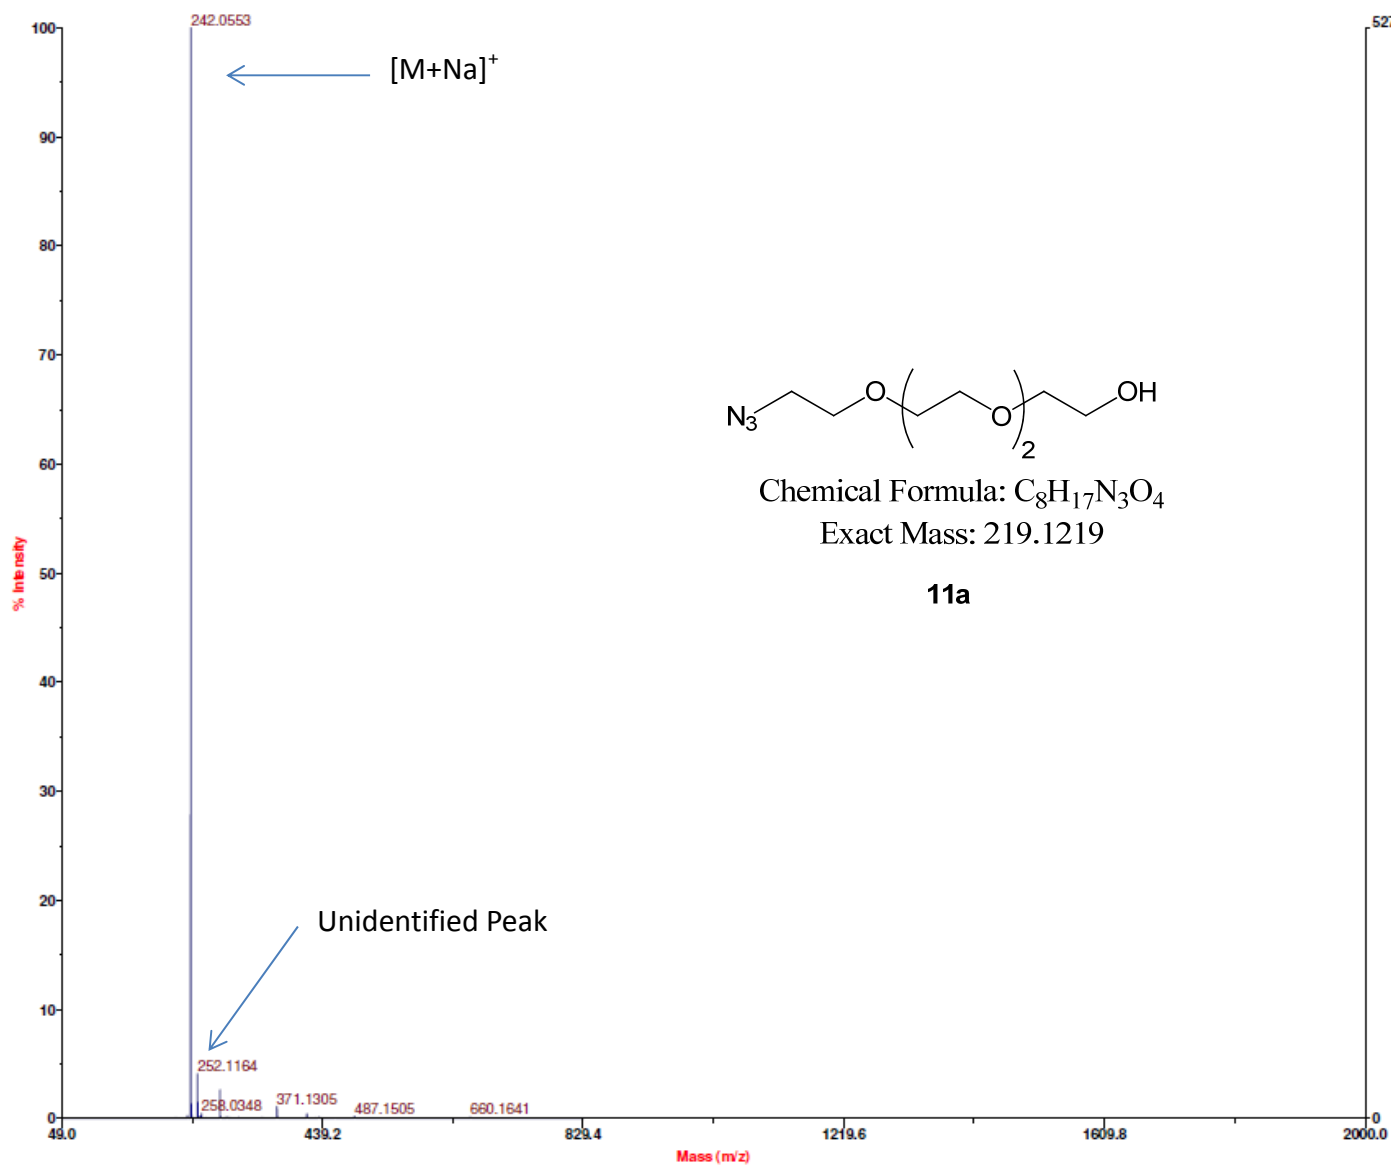

|                                       |                |
|---------------------------------------|----------------|
| --> Mariner System State <--          |                |
| Instrument State                      | ON             |
| Ion Polarity                          | POS            |
| Auxiliary Gas                         | ON             |
| Curtain Gas                           | ON             |
| Nebulizer Gas                         | ON             |
| Calibration Constant A                | 5.0146867E-007 |
| Calibration Constant B                | 77.798312      |
| TDC Deadtime                          | 10             |
| --> Source Settings <--               |                |
| Spray Tip Potential                   | 4509.96        |
| SCIEX Heater                          | 300.05         |
| --> API Interface Settings <--        |                |
| Nozzle Potential                      | 40.04          |
| Skimmer 1 Potential                   | 10.01          |
| Quadrupole DC Potential               | 5.49           |
| Deflection Voltage                    | 0.10           |
| Einzel Lens Potential                 | -24.00         |
| Quadrupole RF Voltage                 | 999.76         |
| Quadrupole Temperature                | 140.01         |
| Nozzle Temperature                    | 140.01         |
| --> Analyzer Settings <--             |                |
| Push Pulse Potential                  | 490.00         |
| Pull Pulse Potential                  | 213.11         |
| Pull Bias Potential                   | 10.00          |
| Acceleration Potential                | 3999.94        |
| Reflector Potential                   | 1549.99        |
| Detector Voltage                      | 1700.24        |
| --> Spectrum Acquisition Settings <-- |                |
| Seconds Per Spectrum                  | 1.00           |
| Ion Count Threshold                   | 0.00           |
| First Mass                            | 50.00          |
| Last Mass                             | 2000.00        |
| Accumulate Spectra                    | OFF            |
| Standby at End of Acquisition         | OFF            |
| --> Centroid Spectra Settings <--     |                |
| Centroid Spectra                      | OFF            |
| --> System Settings <--               |                |
| Gas Control Mode                      | Manual         |
| Syringe Pump Mode                     | Manual         |
| Syringe Pump Rate                     | 50.00          |
| Syringe Diameter                      | 3.26           |
| Min Analyzer Mass                     | 50.00          |
| Max Analyzer Mass                     | 4000.00        |

Acquired: Oct 11 11:20:00 2011  
Mariner Mass Spectrum  
C:\Mariner\Data\2011\Oct\11 Tue\ZH3-123001.dat

Printed: 11:22, October 11, 2011

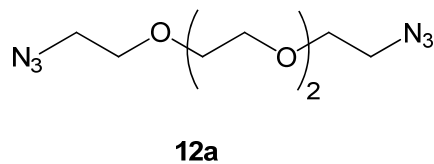

3.496  
3.484  
3.468  
3.196  
3.183  
3.171

```

NAME      ZH3-123-A_N3-P4-N3
EXPNO     1
PROCNO    1
Date_     20111007
Time      14.08
INSTRUM   spect
PROBHD    5 mm PABBO BB-
PULPROG   zg30
TD         65536
SOLVENT   CDCl3
NS         16
DS         2
SWH        8802.817 Hz
FIDRES     0.134320 Hz
AQ         3.7224948 sec
RG         9
DW         56.800 usec
DE         6.50 usec
TE         292.9 K
D1         1.00000000 sec
TD0        1
    
```

```

===== CHANNEL f1 =====
NUC1      1H
P1         14.85 usec
PL1       -0.60 dB
PL1W      13.81451130 W
SFO1      400.1320007 MHz
SI         32768
SF         400.1300000 MHz
WDW        EM
SSB        0
LB         0.30 Hz
GB         0
PC         1.00
    
```

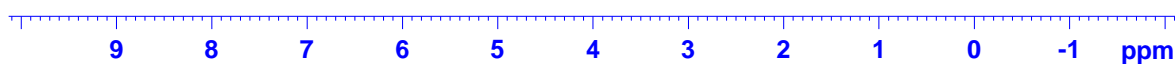

12.04  
4.00  
78.727  
78.405  
78.083  
71.255  
71.204  
70.598  
51.249

```

NAME      ZH3-123-A_N3-P4-N3
EXPNO     2
PROCNO    1
Date_     20111007
Time      22.02
INSTRUM   spect
PROBHD    5 mm PABBO BB-
PULPROG   zgpg30
TD         65536
SOLVENT   CDCl3
NS         1024
DS         4
SWH        24038.461 Hz
FIDRES     0.366798 Hz
AQ         1.3631988 sec
RG         812
DW         20.800 usec
DE         6.50 usec
TE         294.5 K
D1         2.00000000 sec
D11        0.03000000 sec
TD0        1
    
```

```

===== CHANNEL f1 =====
NUC1      13C
P1         9.99 usec
PL1       -3.00 dB
PL1W      73.67452240 W
SFO1      100.6228298 MHz
    
```

```

===== CHANNEL f2 =====
CPDPRG2   waltz16
NUC2      1H
PCPD2     80.00 usec
PL2       -0.65 dB
PL12      13.40 dB
PL13      13.40 dB
PL2W      13.97447491 W
PL12W     0.54996562 W
PL13W     0.54996562 W
SFO2      400.1316005 MHz
SI         32768
SF         100.6126885 MHz
WDW        EM
SSB        0
LB         1.00 Hz
GB         0
PC         1.40
    
```

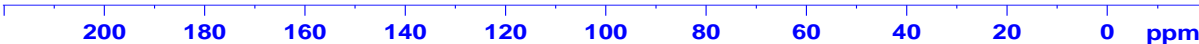

Applied Biosystems Mariner System 5268

Mariner Spec /1:28 (T/0.00:0.48) ASC[BP = 267.2, 724]

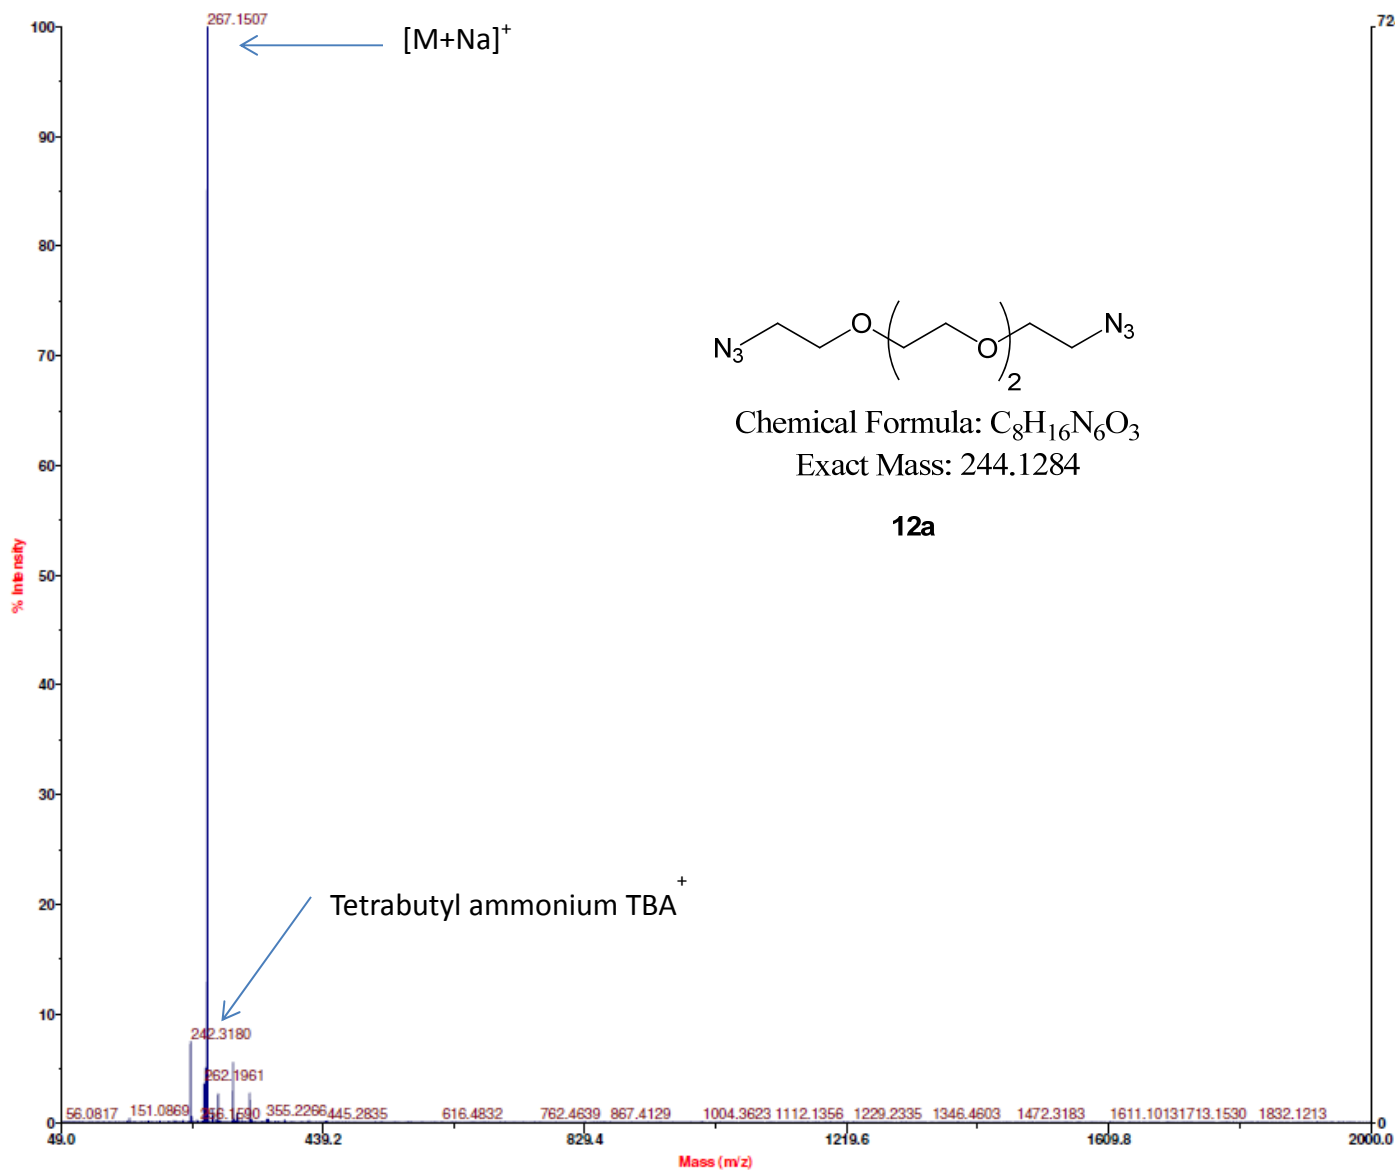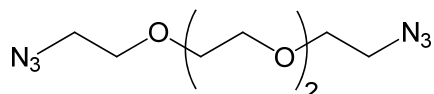

Chemical Formula: C<sub>8</sub>H<sub>16</sub>N<sub>6</sub>O<sub>3</sub>

Exact Mass: 244.1284

12a

|                                       |                |
|---------------------------------------|----------------|
| --> Mariner System State <--          |                |
| Instrument State                      | ON             |
| Ion Polarity                          | POS            |
| Auxiliary Gas                         | ON             |
| Curtain Gas                           | ON             |
| Nebulizer Gas                         | ON             |
| Calibration Constant A                | 5.0146867E-007 |
| Calibration Constant B                | 77.798312      |
| TDC Deadtime                          | 10             |
| --> Source Settings <--               |                |
| Spray Tip Potential                   | 4509.96        |
| SCIEX Heater                          | 300.05         |
| --> API Interface Settings <--        |                |
| Nozzle Potential                      | 40.04          |
| Skimmer 1 Potential                   | 10.01          |
| Quadrupole DC Potential               | 5.49           |
| Deflection Voltage                    | 0.10           |
| Einzel Lens Potential                 | -24.00         |
| Quadrupole RF Voltage                 | 999.76         |
| Quadrupole Temperature                | 140.01         |
| Nozzle Temperature                    | 140.01         |
| --> Analyzer Settings <--             |                |
| Push Pulse Potential                  | 490.00         |
| Pull Pulse Potential                  | 213.11         |
| Pull Bias Potential                   | 10.00          |
| Acceleration Potential                | 3999.94        |
| Reflector Potential                   | 1549.99        |
| Detector Voltage                      | 1700.24        |
| --> Spectrum Acquisition Settings <-- |                |
| Seconds Per Spectrum                  | 1.00           |
| Ion Count Threshold                   | 0.00           |
| First Mass                            | 50.00          |
| Last Mass                             | 2000.00        |
| Accumulate Spectra                    | OFF            |
| Standby at End of Acquisition         | OFF            |
| --> Centroid Spectra Settings <--     |                |
| Centroid Spectra                      | OFF            |
| --> System Settings <--               |                |
| Gas Control Mode                      | Manual         |
| Syringe Pump Mode                     | Manual         |
| Syringe Pump Rate                     | 50.00          |
| Syringe Diameter                      | 3.26           |
| Min Analyzer Mass                     | 50.00          |
| Max Analyzer Mass                     | 4000.00        |

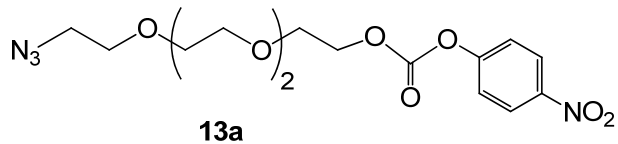

```

NAME      ZH3-124-P_N3-P4-PNPC
EXPNO     1
PROCNO    1
Date_     20111012
Time      21.23
INSTRUM   spect
PROBHD    5 mm PABBO BB-
PULPROG   zg30
TD        65536
SOLVENT   CDCl3
NS        16
DS        2
SWH       8802.817 Hz
FIDRES    0.134320 Hz
AQ        3.7224948 sec
RG        25.4
DW        56.800 usec
DE        6.50 usec
TE        292.8 K
D1        1.00000000 sec
TD0       1
    
```

```

===== CHANNEL f1 =====
NUC1      1H
P1        14.85 usec
PL1       -0.60 dB
PL1W      13.81451130 W
SF01      400.1320007 MHz
SI        32768
SF        400.1300000 MHz
WDW       EM
SSB       0
LB        0.30 Hz
GB        0
PC        1.00
    
```

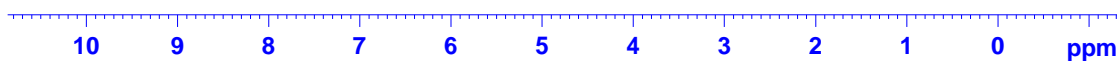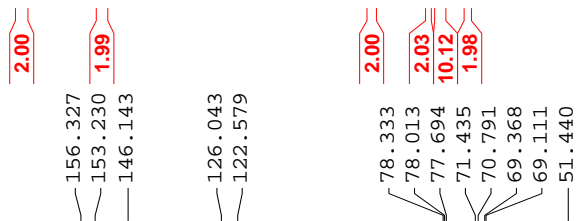

```

NAME      ZH3-124-P_N3-P4-PNPC
EXPNO     2
PROCNO    1
Date_     20111012
Time      23.23
INSTRUM   spect
PROBHD    5 mm PABBO BB-
PULPROG   zgpg30
TD        65536
SOLVENT   CDCl3
NS        2048
DS        4
SWH       24038.461 Hz
FIDRES    0.366798 Hz
AQ        1.3631988 sec
RG        80.6
DW        20.800 usec
DE        6.50 usec
TE        294.4 K
D1        2.00000000 sec
D11       0.03000000 sec
TD0       1
    
```

```

===== CHANNEL f1 =====
NUC1      13C
P1        9.99 usec
PL1       -3.00 dB
PL1W      73.67452240 W
SF01      100.6228298 MHz
    
```

```

===== CHANNEL f2 =====
CPDPRG2   waltz16
NUC2      1H
PCPD2     80.00 usec
PL2       -0.65 dB
PL12      13.40 dB
PL13      13.40 dB
PL2W      13.97447491 W
PL12W     0.54996562 W
PL13W     0.54996562 W
SF02      400.1316005 MHz
SI        32768
SF        100.6126885 MHz
WDW       EM
SSB       0
LB        1.00 Hz
GB        0
PC        1.40
    
```

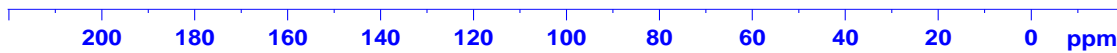

Mariner Spec /1:28 (T/0.00:0.48) ASC[BP = 407.0, 215]

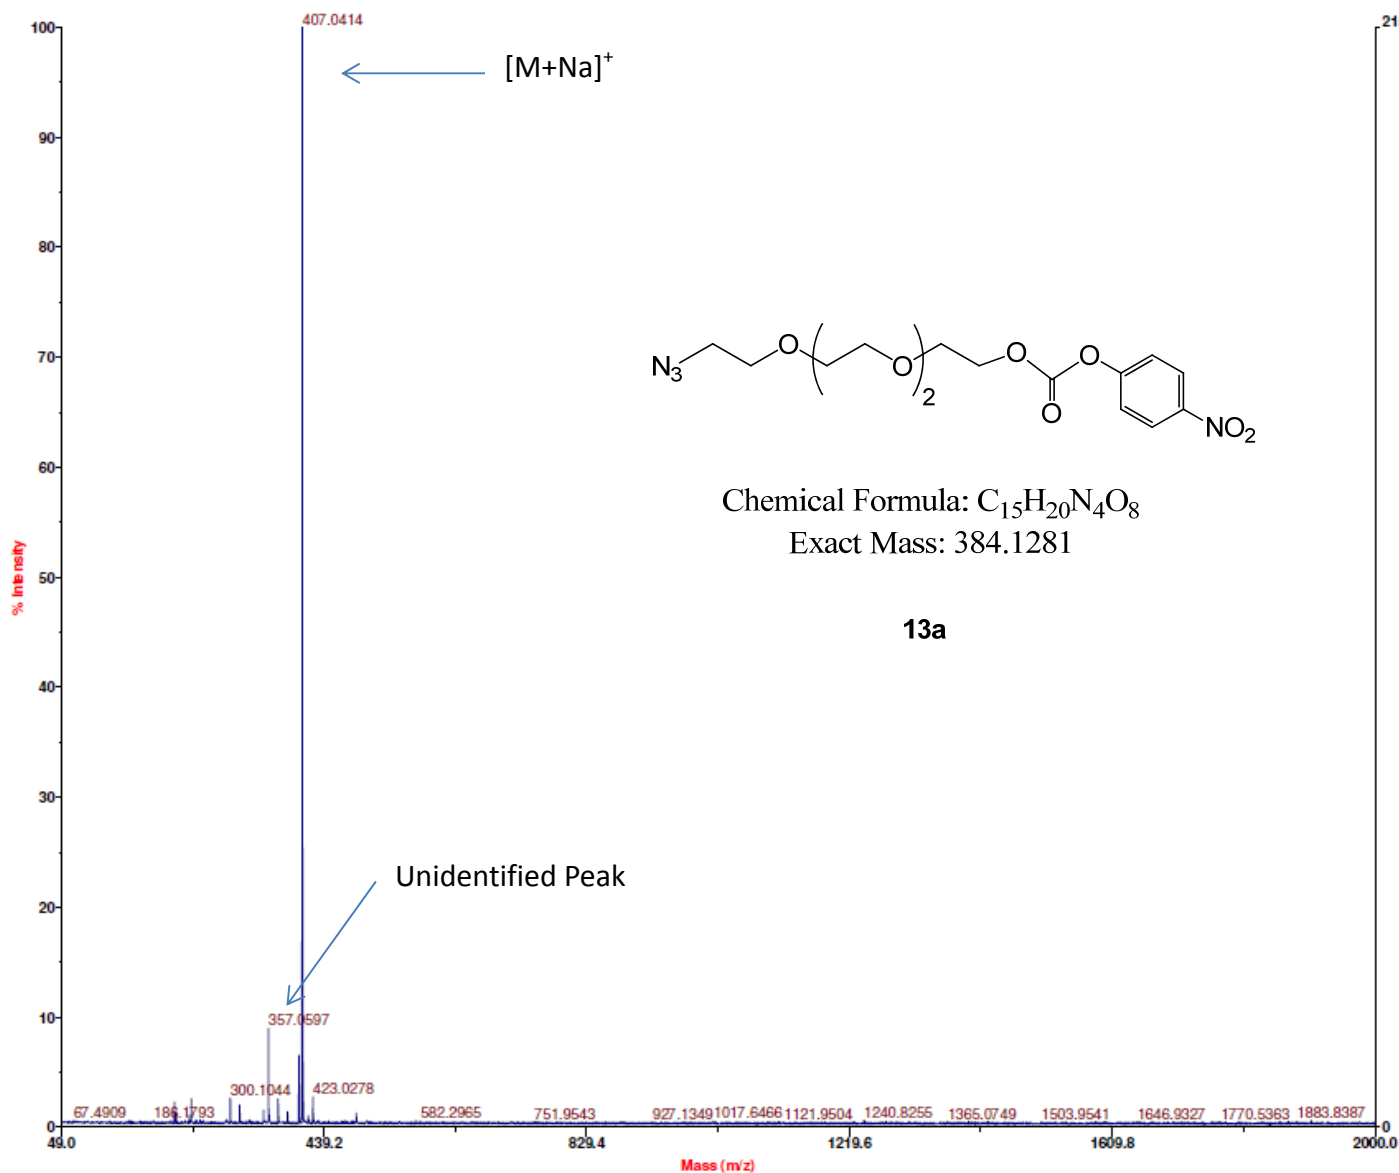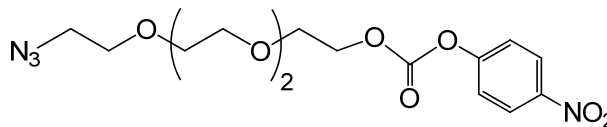

Chemical Formula: C<sub>15</sub>H<sub>20</sub>N<sub>4</sub>O<sub>8</sub>

Exact Mass: 384.1281

13a

|                                       |                |
|---------------------------------------|----------------|
| --> Mariner System State <--          |                |
| Instrument State                      | ON             |
| Ion Polarity                          | POS            |
| Auxiliary Gas                         | ON             |
| Curtain Gas                           | ON             |
| Nebulizer Gas                         | ON             |
| Calibration Constant A                | 5.0146867E-007 |
| Calibration Constant B                | 77.798312      |
| TDC Deadtime                          | 10             |
| --> Source Settings <--               |                |
| Spray Tip Potential                   | 4509.96        |
| SCIEX Heater                          | 300.05         |
| --> API Interface Settings <--        |                |
| Nozzle Potential                      | 40.04          |
| Skimmer 1 Potential                   | 10.01          |
| Quadrupole DC Potential               | 5.49           |
| Deflection Voltage                    | 0.10           |
| Einzel Lens Potential                 | -24.00         |
| Quadrupole RF Voltage                 | 999.76         |
| Quadrupole Temperature                | 140.01         |
| Nozzle Temperature                    | 140.01         |
| --> Analyzer Settings <--             |                |
| Push Pulse Potential                  | 490.00         |
| Pull Pulse Potential                  | 213.11         |
| Pull Bias Potential                   | 10.00          |
| Acceleration Potential                | 3999.94        |
| Reflector Potential                   | 1549.99        |
| Detector Voltage                      | 1700.24        |
| --> Spectrum Acquisition Settings <-- |                |
| Seconds Per Spectrum                  | 1.00           |
| Ion Count Threshold                   | 0.00           |
| First Mass                            | 50.00          |
| Last Mass                             | 2000.00        |
| Accumulate Spectra                    | OFF            |
| Standby at End of Acquisition         | OFF            |
| --> Centroid Spectra Settings <--     |                |
| Centroid Spectra                      | OFF            |
| --> System Settings <--               |                |
| Gas Control Mode                      | Manual         |
| Syringe Pump Mode                     | Manual         |
| Syringe Pump Rate                     | 50.00          |
| Syringe Diameter                      | 3.26           |
| Min Analyzer Mass                     | 50.00          |
| Max Analyzer Mass                     | 4000.00        |

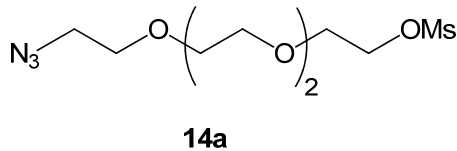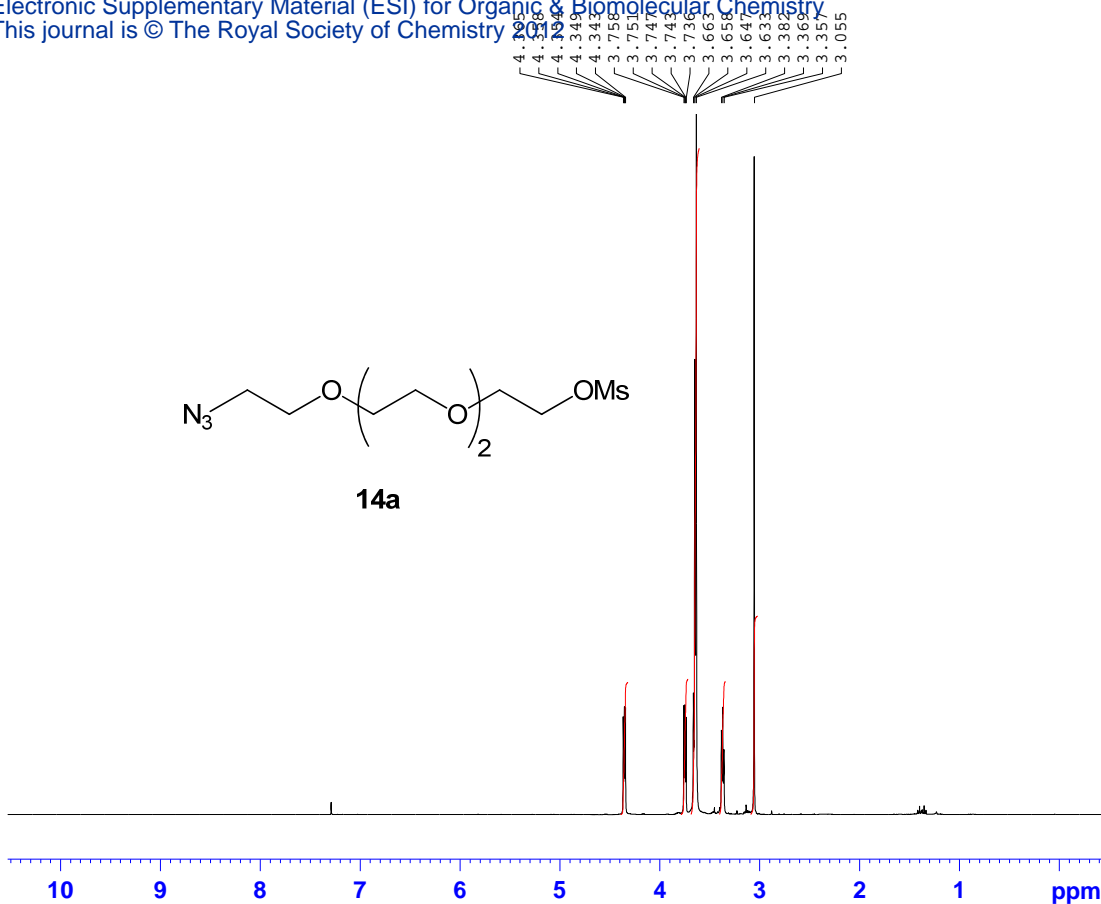

```

NAME      LG-799M_N3-TEG-OMs
EXPNO     4
PROCNO    1
Date_     20111012
Time      11.01
INSTRUM   spect
PROBHD    5 mm PABBO BB-
PULPROG   zg30
TD         65536
SOLVENT   CDCl3
NS         16
DS         2
SWH        8802.817 Hz
FIDRES     0.134320 Hz
AQ         3.7224948 sec
RG         28.5
DW         56.800 usec
DE         6.50 usec
TE         292.3 K
D1         1.00000000 sec
D10        1
TD0        1
    
```

```

===== CHANNEL f1 =====
NUC1      1H
P1        14.85 usec
PL1       -0.60 dB
PL1W      13.81451130 W
SFO1      400.1320007 MHz
SI         32768
SF         400.1300000 MHz
WDW        EM
SSB        0
LB         0.30 Hz
GB         0
PC         1.00
    
```

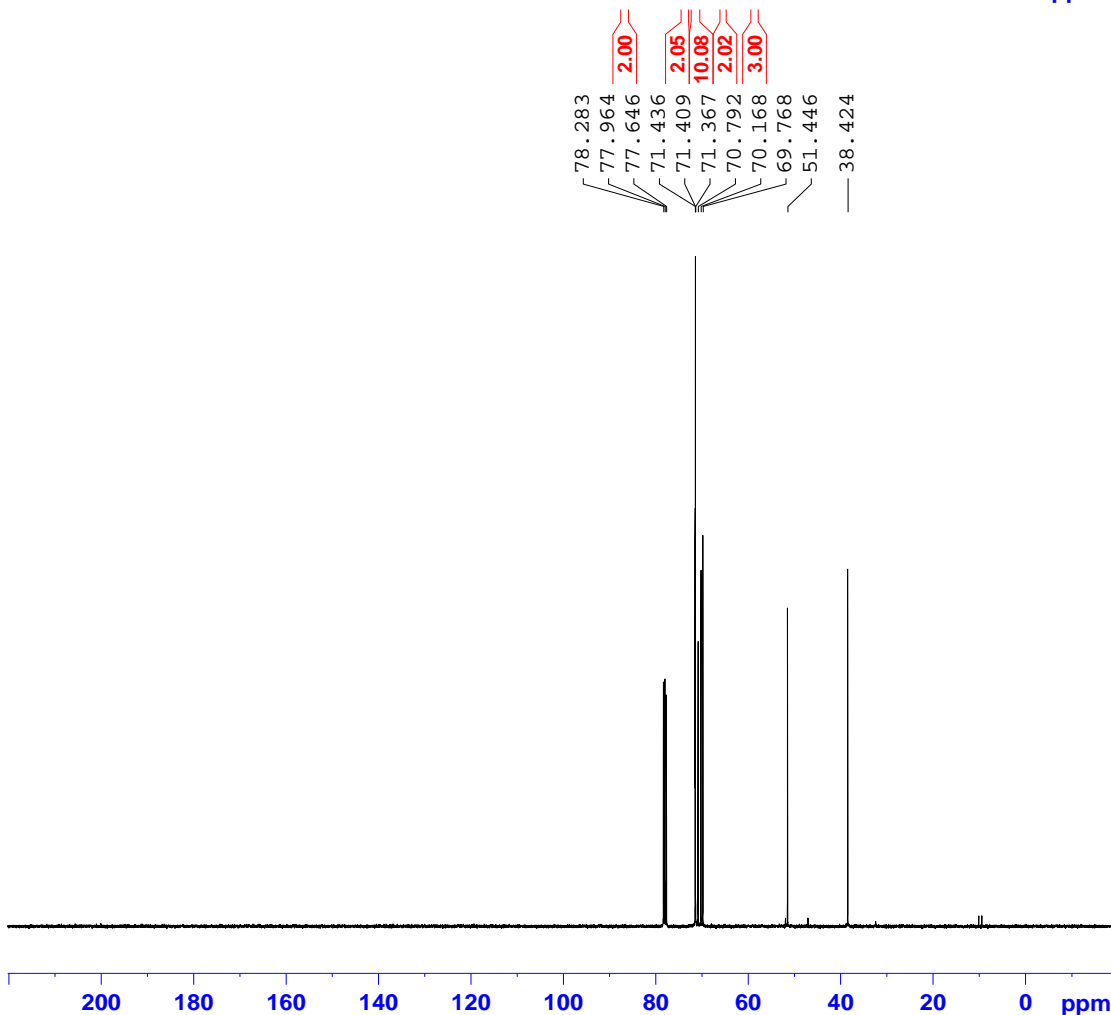

```

NAME      LG-799M_N3-TEG-OMs
EXPNO     5
PROCNO    1
Date_     20111012
Time      11.57
INSTRUM   spect
PROBHD    5 mm PABBO BB-
PULPROG   zgpg30
TD         65536
SOLVENT   CDCl3
NS         512
DS         4
SWH        24038.461 Hz
FIDRES     0.366798 Hz
AQ         1.3631988 sec
RG         80.6
DW         20.800 usec
DE         6.50 usec
TE         294.3 K
D1         2.00000000 sec
D11        0.03000000 sec
TD0        1
    
```

```

===== CHANNEL f1 =====
NUC1      13C
P1        9.99 usec
PL1       -3.00 dB
PL1W      73.67452240 W
SFO1      100.6228298 MHz
    
```

```

===== CHANNEL f2 =====
CPDPRG2   waltz16
NUC2      1H
PCPD2     80.00 usec
PL2       -0.65 dB
PL12      13.40 dB
PL13      13.40 dB
PL2W      13.97447491 W
PL12W     0.54996562 W
PL13W     0.54996562 W
SFO2      400.1316005 MHz
SI         32768
SF         100.6126885 MHz
WDW        EM
SSB        0
LB         1.00 Hz
GB         0
PC         1.40
    
```

Mariner Spec /1:25 (T/0.00:0.43) ASC[BP = 320.1, 1830]

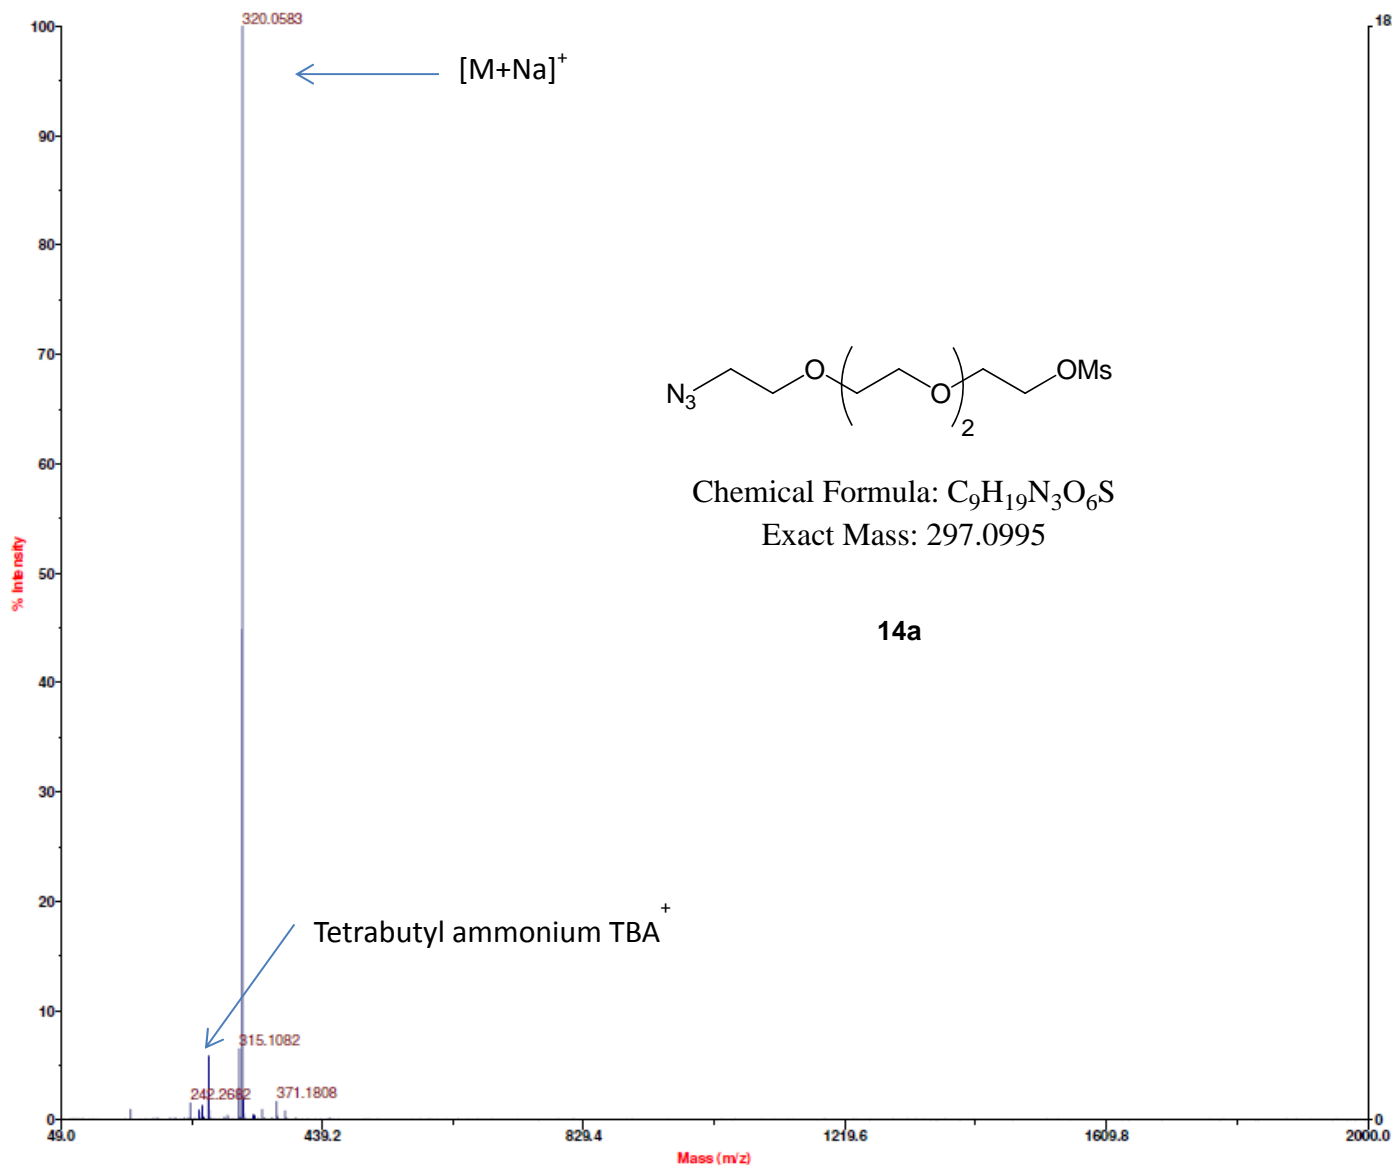

--> Mariner System State <--

|                                       |                |
|---------------------------------------|----------------|
| Instrument State                      | ON             |
| Ion Polarity                          | POS            |
| Auxiliary Gas                         | ON             |
| Curtain Gas                           | ON             |
| Nebulizer Gas                         | ON             |
| Calibration Constant A                | 5.0146867E-007 |
| Calibration Constant B                | 77.798312      |
| TDC Deadtime                          | 10             |
| --> Source Settings <--               |                |
| Spray Tip Potential                   | 4509.96        |
| SCIEX Heater                          | 300.05         |
| --> API Interface Settings <--        |                |
| Nozzle Potential                      | 40.04          |
| Skimmer 1 Potential                   | 10.01          |
| Quadrupole DC Potential               | 5.49           |
| Deflection Voltage                    | 0.10           |
| Einzel Lens Potential                 | -24.00         |
| Quadrupole RF Voltage                 | 999.76         |
| Quadrupole Temperature                | 140.01         |
| Nozzle Temperature                    | 140.01         |
| --> Analyzer Settings <--             |                |
| Push Pulse Potential                  | 490.00         |
| Pull Pulse Potential                  | 213.11         |
| Pull Bias Potential                   | 10.00          |
| Acceleration Potential                | 3999.94        |
| Reflector Potential                   | 1549.99        |
| Detector Voltage                      | 1700.24        |
| --> Spectrum Acquisition Settings <-- |                |
| Seconds Per Spectrum                  | 1.00           |
| Ion Count Threshold                   | 0.00           |
| First Mass                            | 50.00          |
| Last Mass                             | 2000.00        |
| Accumulate Spectra                    | OFF            |
| Standby at End of Acquisition         | OFF            |
| --> Centroid Spectra Settings <--     |                |
| Centroid Spectra                      | OFF            |
| --> System Settings <--               |                |
| Gas Control Mode                      | Manual         |
| Syringe Pump Mode                     | Manual         |
| Syringe Pump Rate                     | 50.00          |
| Syringe Diameter                      | 3.26           |
| Min Analyzer Mass                     | 50.00          |
| Max Analyzer Mass                     | 4000.00        |

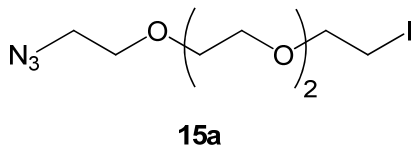

3.751  
3.733  
3.717  
3.672  
3.667  
3.660  
3.651  
3.645  
3.638  
3.381  
3.368  
3.356  
3.258  
3.240  
3.223

```

NAME      LG-802_N3-TEG-Iodo
EXPNO     1
PROCNO    1
Date_     20111012
Time      20.16
INSTRUM   spect
PROBHD    5 mm PABBO BB-
PULPROG   zg30
TD        65536
SOLVENT   CDCl3
NS        16
DS        2
SWH       8802.817 Hz
FIDRES    0.134320 Hz
AQ        3.7224948 sec
RG        28.5
DW        56.800 usec
DE        6.50 usec
TE        292.6 K
D1        1.00000000 sec
TD0       1
    
```

10 9 8 7 6 5 4 3 2 1 ppm

```

===== CHANNEL f1 =====
NUC1      1H
P1        14.85 usec
PL1       -0.60 dB
PL1W      13.81451130 W
SFO1      400.1320007 MHz
SI        32768
SF        400.1300000 MHz
WDW       EM
SSB       0
LB        0.30 Hz
GB        0
PC        1.00
    
```

2.09  
10.11  
1.98  
2.00

78.311  
77.992  
77.673  
72.733  
71.492  
71.462  
71.007  
70.839  
51.475

```

NAME      LG-802_N3-TEG-Iodo
EXPNO     2
PROCNO    1
Date_     20111012
Time      21.17
INSTRUM   spect
PROBHD    5 mm PABBO BB-
PULPROG   zgpg30
TD        65536
SOLVENT   CDCl3
NS        1024
DS        4
SWH       24038.461 Hz
FIDRES    0.366798 Hz
AQ        1.3631988 sec
RG        912
DW        20.800 usec
DE        6.50 usec
TE        294.3 K
D1        2.00000000 sec
D11       0.03000000 sec
TD0       1
    
```

```

===== CHANNEL f1 =====
NUC1      13C
P1        9.99 usec
PL1       -3.00 dB
PL1W      73.67452240 W
SFO1      100.6228298 MHz
    
```

```

===== CHANNEL f2 =====
CPDPRG2   waltz16
NUC2      1H
PCPD2     80.00 usec
PL2       -0.65 dB
PL12      13.40 dB
PL13      13.40 dB
PL2W      13.97447491 W
PL12W     0.54996562 W
PL13W     0.54996562 W
SFO2      400.1316005 MHz
SI        32768
SF        100.6126885 MHz
WDW       EM
SSB       0
LB        1.00 Hz
GB        0
PC        1.40
    
```

200 180 160 140 120 100 80 60 40 20 0 ppm



Mariner Spec /1:35 (T/0.00:0.61) ASC[BP = 352.0, 917]

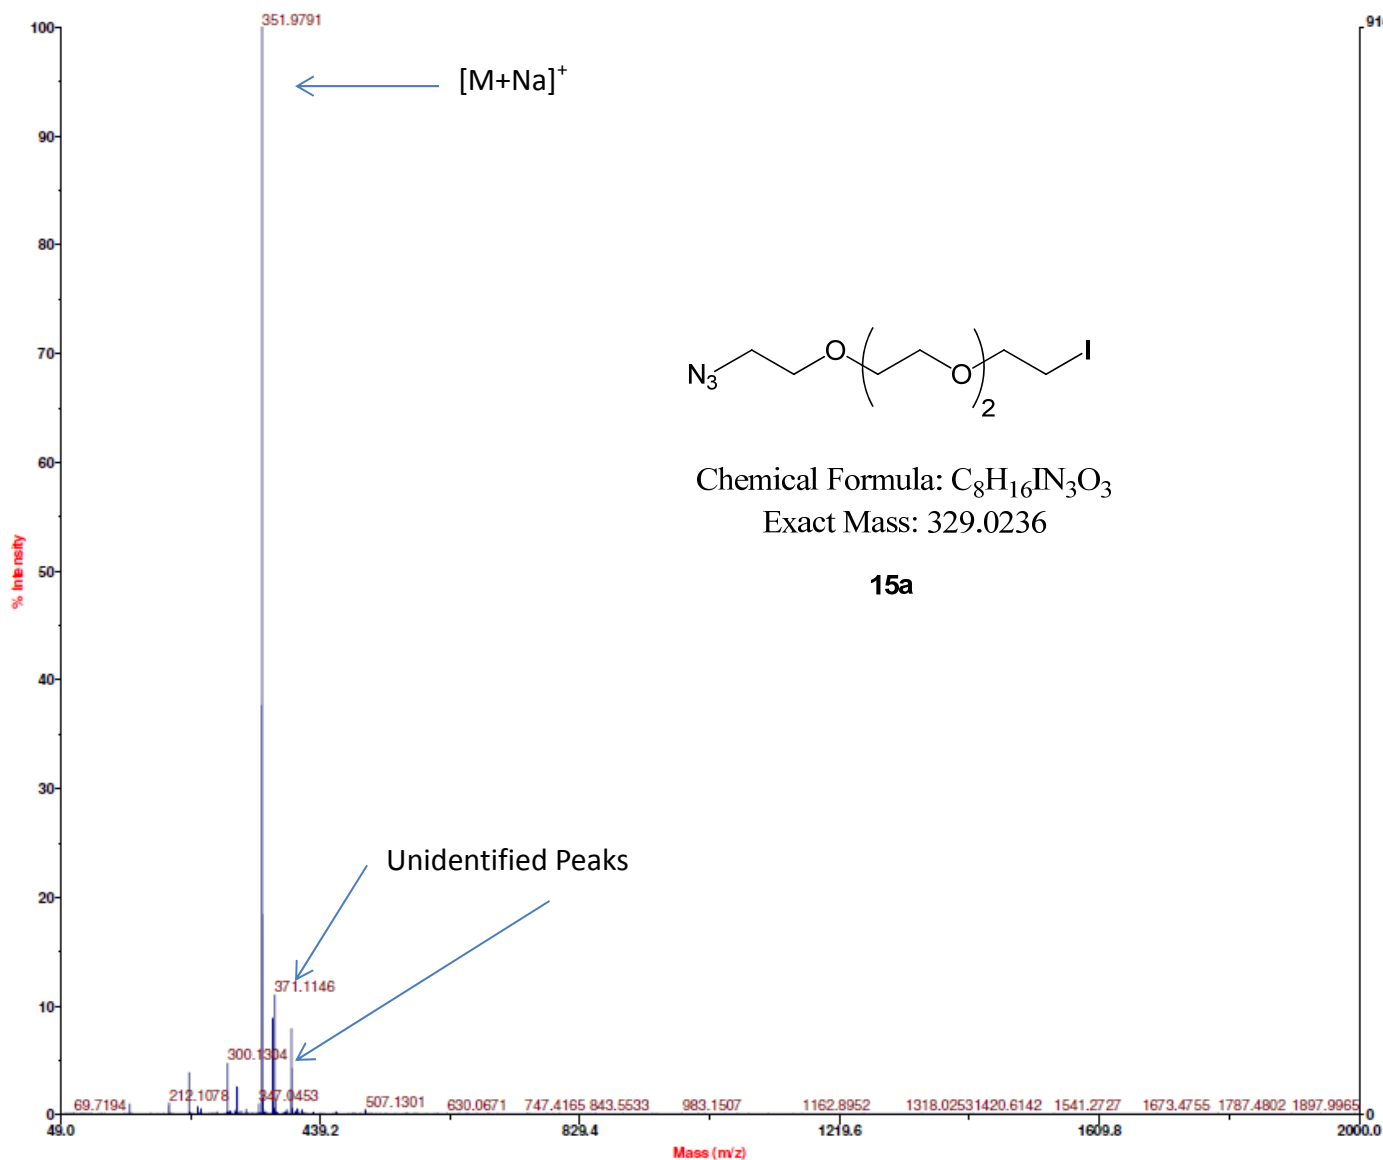

|                                       |                |
|---------------------------------------|----------------|
| --> Mariner System State <--          |                |
| Instrument State                      | ON             |
| Ion Polarity                          | POS            |
| Auxiliary Gas                         | ON             |
| Curtain Gas                           | ON             |
| Nebulizer Gas                         | ON             |
| Calibration Constant A                | 5.0146867E-007 |
| Calibration Constant B                | 77.798312      |
| TDC Deadtime                          | 10             |
| --> Source Settings <--               |                |
| Spray Tip Potential                   | 4509.96        |
| SCIEX Heater                          | 300.05         |
| --> API Interface Settings <--        |                |
| Nozzle Potential                      | 40.04          |
| Skimmer 1 Potential                   | 10.01          |
| Quadrupole DC Potential               | 5.49           |
| Deflection Voltage                    | 0.10           |
| Einzel Lens Potential                 | -24.00         |
| Quadrupole RF Voltage                 | 999.76         |
| Quadrupole Temperature                | 140.01         |
| Nozzle Temperature                    | 140.01         |
| --> Analyzer Settings <--             |                |
| Push Pulse Potential                  | 490.00         |
| Pull Pulse Potential                  | 213.11         |
| Pull Bias Potential                   | 10.00          |
| Acceleration Potential                | 3999.94        |
| Reflector Potential                   | 1549.99        |
| Detector Voltage                      | 1700.24        |
| --> Spectrum Acquisition Settings <-- |                |
| Seconds Per Spectrum                  | 1.00           |
| Ion Count Threshold                   | 0.00           |
| First Mass                            | 50.00          |
| Last Mass                             | 2000.00        |
| Accumulate Spectra                    | OFF            |
| Standby at End of Acquisition         | OFF            |
| --> Centroid Spectra Settings <--     |                |
| Centroid Spectra                      | OFF            |
| --> System Settings <--               |                |
| Gas Control Mode                      | Manual         |
| Syringe Pump Mode                     | Manual         |
| Syringe Pump Rate                     | 50.00          |
| Syringe Diameter                      | 3.26           |
| Min Analyzer Mass                     | 50.00          |
| Max Analyzer Mass                     | 4000.00        |

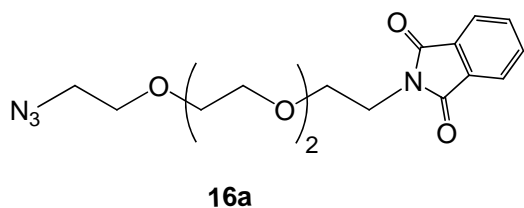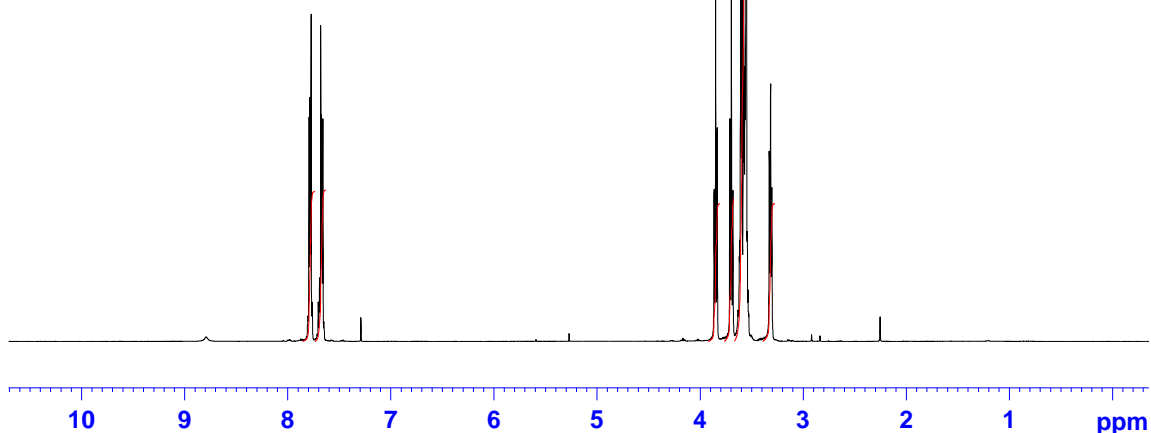

```

NAME      LG-801_N3-TEG-NPth
EXPNO    1
PROCNO   1
Date_    20111012
Time     18.10
INSTRUM  spect
PROBHD   5 mm PABBO BB-
PULPROG  zg30
TD       65536
SOLVENT  CDCl3
NS       16
DS       2
SWH      8802.817 Hz
FIDRES   0.134320 Hz
AQ       3.7224948 sec
RG       25.4
DW       56.800 usec
DE       6.50 usec
TE       292.5 K
D1       1.00000000 sec
TD0      1
    
```

```

===== CHANNEL f1 =====
NUC1     1H
P1       14.85 usec
PL1      -0.60 dB
PL1W    13.81451130 W
SFO1    400.1320007 MHz
SI       32768
SF       400.1300000 MHz
WDW      EM
SSB      0
LB       0.30 Hz
GB       0
PC       1.00
    
```

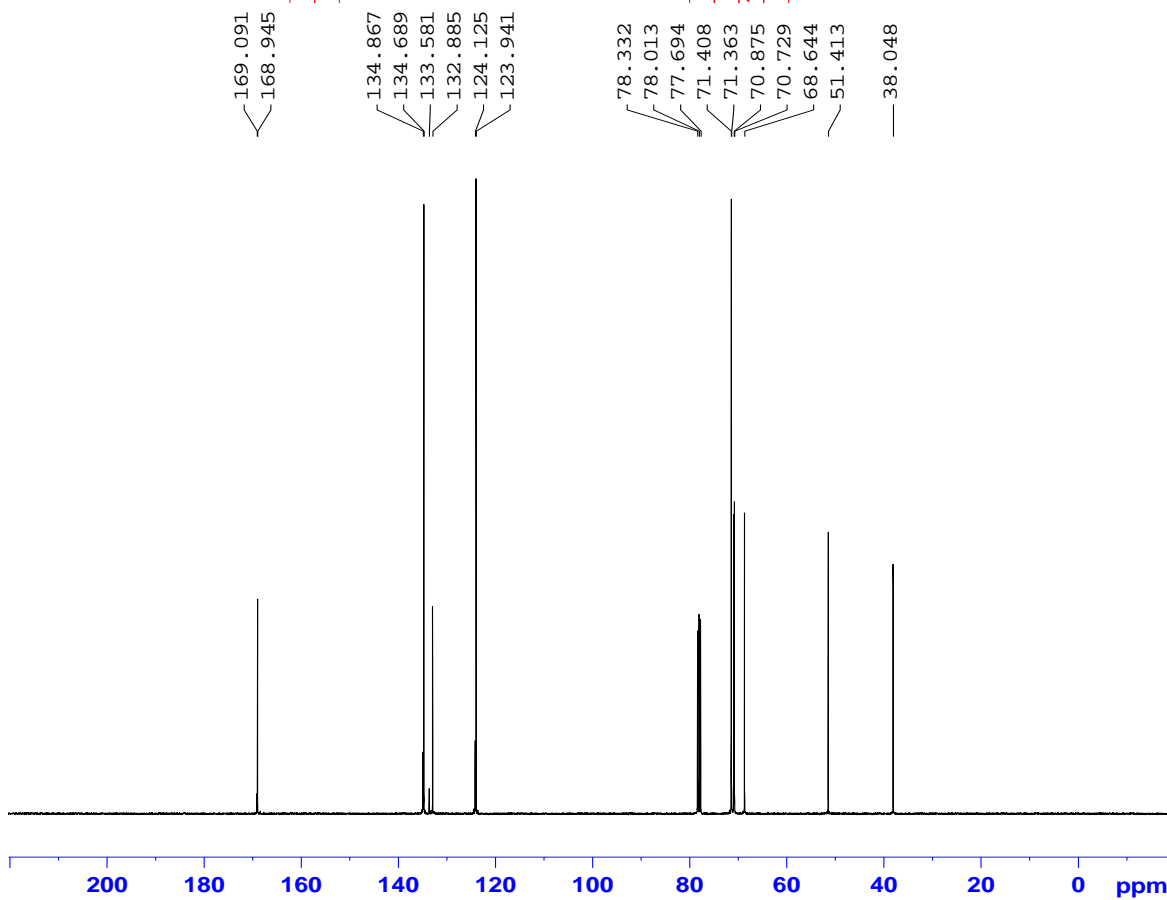

```

NAME      LG-801_N3-TEG-NPth
EXPNO    2
PROCNO   1
Date_    20111012
Time     19.12
INSTRUM  spect
PROBHD   5 mm PABBO BB-
PULPROG  zgpg30
TD       65536
SOLVENT  CDCl3
NS       1024
DS       4
SWH      24038.461 Hz
FIDRES   0.366798 Hz
AQ       1.3631988 sec
RG       80.6
DW       20.800 usec
DE       6.50 usec
TE       294.4 K
D1       2.00000000 sec
D11      0.03000000 sec
TD0      1
    
```

```

===== CHANNEL f1 =====
NUC1     13C
P1       9.99 usec
PL1      -3.00 dB
PL1W    73.67452240 W
SFO1    100.6228298 MHz
    
```

```

===== CHANNEL f2 =====
CPDPRG2  waltz16
NUC2     1H
PCPD2    80.00 usec
PL2      -0.65 dB
PL12     13.40 dB
PL13     13.40 dB
PL2W    13.974447491 W
PL12W   0.54996562 W
PL13W   0.54996562 W
SFO2    400.1316005 MHz
SI       32768
SF       100.6126885 MHz
WDW      EM
SSB      0
LB       1.00 Hz
GB       0
PC       1.40
    
```

Mariner Spec #1:33 (T/0.00:0.57) ASC[BP = 371.1, 143]

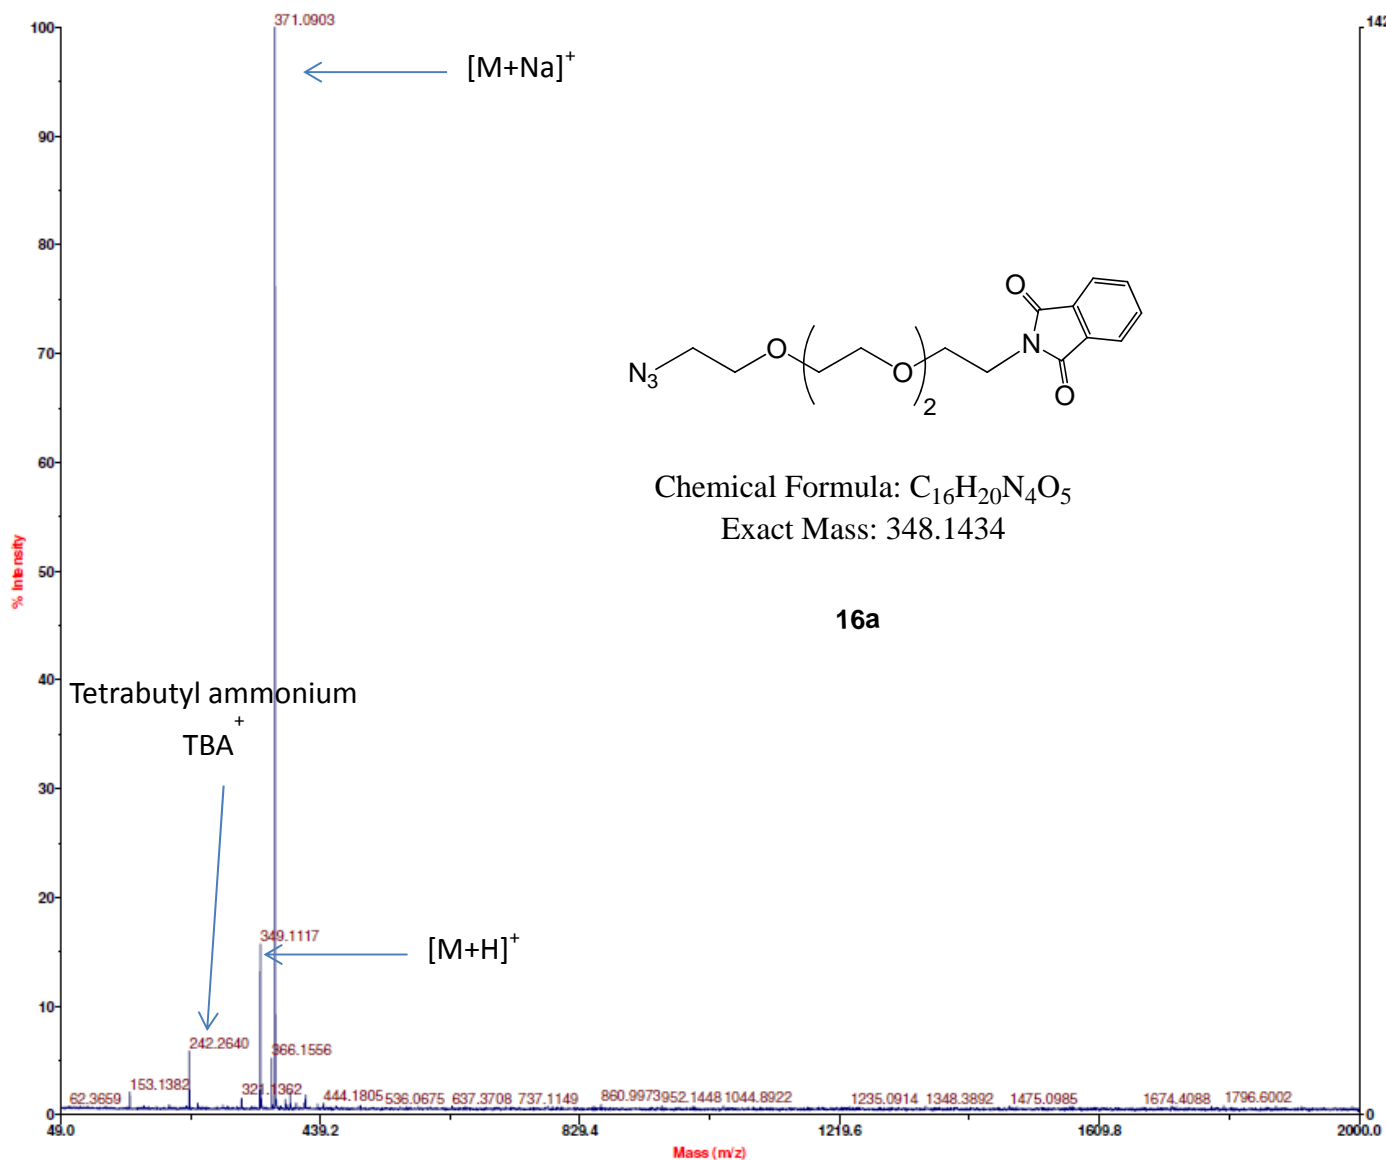

| Parameter                             | Value          |
|---------------------------------------|----------------|
| --> Mariner System State <--          |                |
| Instrument State                      | ON             |
| Ion Polarity                          | POS            |
| Auxiliary Gas                         | ON             |
| Curtain Gas                           | ON             |
| Nebulizer Gas                         | ON             |
| Calibration Constant A                | 5.0146867E-007 |
| Calibration Constant B                | 77.798312      |
| TDC Deadtime                          | 10             |
| --> Source Settings <--               |                |
| Spray Tip Potential                   | 4509.96        |
| SCIEX Heater                          | 300.05         |
| --> API Interface Settings <--        |                |
| Nozzle Potential                      | 40.04          |
| Skimmer 1 Potential                   | 10.01          |
| Quadrupole DC Potential               | 5.49           |
| Deflection Voltage                    | 0.10           |
| Einzel Lens Potential                 | -24.00         |
| Quadrupole RF Voltage                 | 999.76         |
| Quadrupole Temperature                | 140.01         |
| Nozzle Temperature                    | 140.01         |
| --> Analyzer Settings <--             |                |
| Push Pulse Potential                  | 490.00         |
| Pull Pulse Potential                  | 213.11         |
| Pull Bias Potential                   | 10.00          |
| Acceleration Potential                | 3999.94        |
| Reflector Potential                   | 1549.99        |
| Detector Voltage                      | 1700.24        |
| --> Spectrum Acquisition Settings <-- |                |
| Seconds Per Spectrum                  | 1.00           |
| Ion Count Threshold                   | 0.00           |
| First Mass                            | 50.00          |
| Last Mass                             | 2000.00        |
| Accumulate Spectra                    | OFF            |
| Standby at End of Acquisition         | OFF            |
| --> Centroid Spectra Settings <--     |                |
| Centroid Spectra                      | OFF            |
| --> System Settings <--               |                |
| Gas Control Mode                      | Manual         |
| Syringe Pump Mode                     | Manual         |
| Syringe Pump Rate                     | 50.00          |
| Syringe Diameter                      | 3.26           |
| Min Analyzer Mass                     | 50.00          |
| Max Analyzer Mass                     | 4000.00        |

Acquired: Oct 13 11:28:00 2011  
Mariner Mass Spectrum  
C:\Mariner\Data\2011\Oct\13 Thur\LNG-801001.dat

Printed: 11:30, October 13, 2011

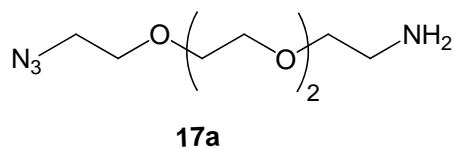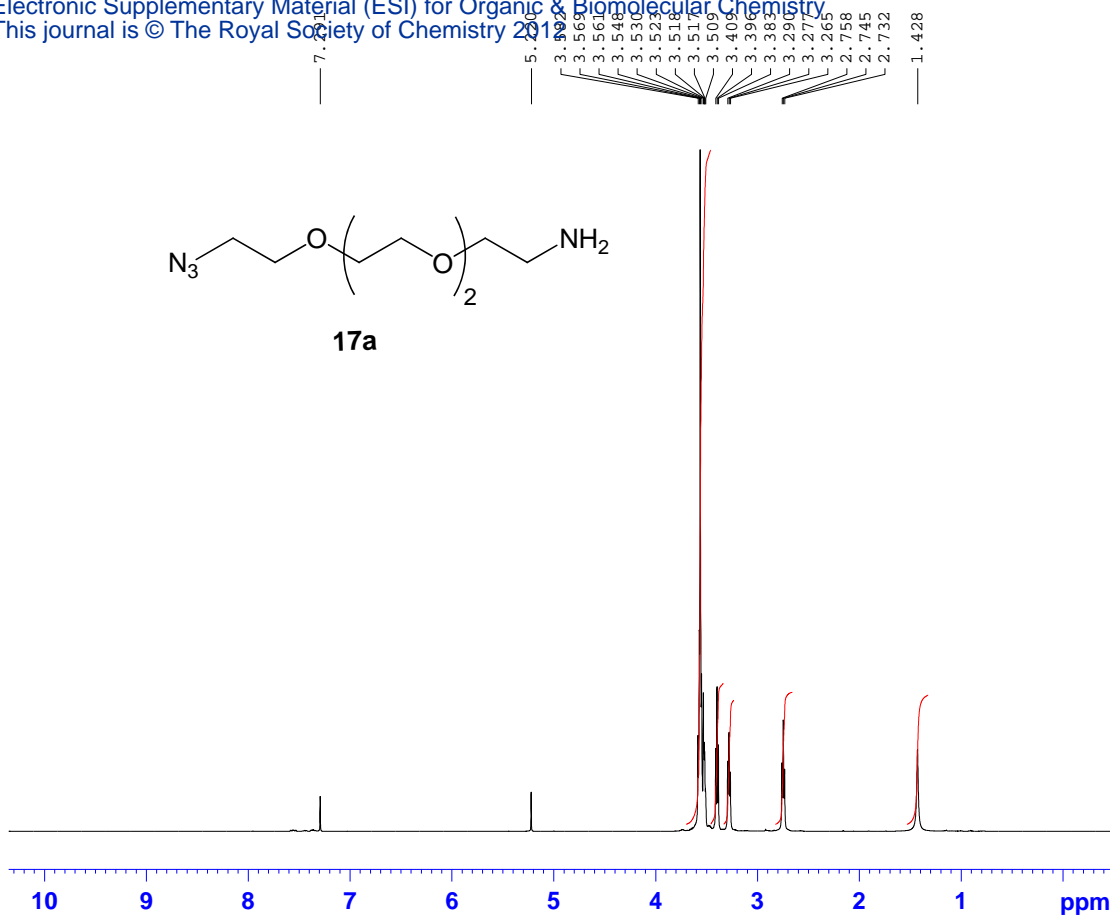

```

NAME      Jan20-2012_N3-P4-NH2
EXPNO    1
PROCNO   1
Date_    20120120
Time     12.40
INSTRUM  spect
PROBHD   5 mm PABBO BB-
PULPROG  zg30
TD       65536
SOLVENT  CDCl3
NS       16
DS       2
SWH      8802.817 Hz
FIDRES   0.134320 Hz
AQ       3.7224948 sec
RG       20.2
DW       56.800 usec
DE       6.50 usec
TE       293.7 K
D1       1.00000000 sec
TD0     1
    
```

```

===== CHANNEL f1 =====
NUC1     1H
P1       14.85 usec
PL1     -0.60 dB
PL1W    13.81451130 W
SF01    400.1320007 MHz
SI       32768
SF       400.1300000 MHz
WDW      EM
SSB      0
LB       0.30 Hz
GB       0
PC       1.00
    
```

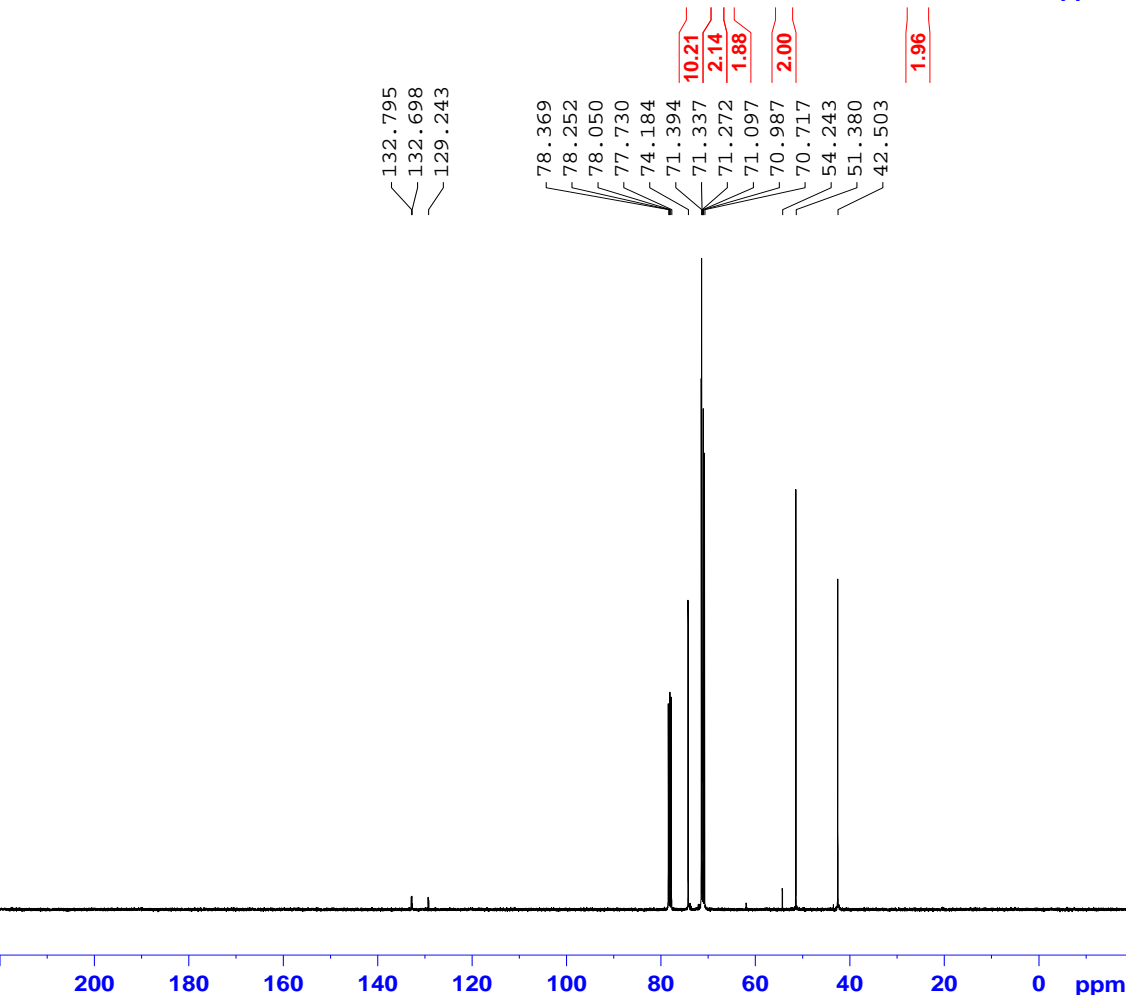

```

NAME      Jan20-2012_N3-P4-NH2
EXPNO    2
PROCNO   1
Date_    20120120
Time     13.16
INSTRUM  spect
PROBHD   5 mm PABBO BB-
PULPROG  zgpg30
TD       65536
SOLVENT  CDCl3
NS       512
DS       4
SWH      24038.461 Hz
FIDRES   0.366798 Hz
AQ       1.3631988 sec
RG       724
DW       20.800 usec
DE       6.50 usec
TE       295.8 K
D1       2.00000000 sec
D11     0.03000000 sec
TD0     1
    
```

```

===== CHANNEL f1 =====
NUC1     13C
P1       9.99 usec
PL1     -3.00 dB
PL1W    73.67452240 W
SF01    100.6228298 MHz
    
```

```

===== CHANNEL f2 =====
CPDPRG2  waltz16
NUC2     1H
PCPD2    80.00 usec
PL2     -0.65 dB
PL12    13.40 dB
PL13    13.40 dB
PL2W    13.97447491 W
PL12W   0.54996562 W
PL13W   0.54996562 W
SFO2    400.1316005 MHz
SI       32768
SF       100.6126885 MHz
WDW      EM
SSB      0
LB       1.00 Hz
GB       0
PC       1.40
    
```

Mariner Spec /1:47 (T/0.00:0.83) ASC[BP = 219.1, 2797]

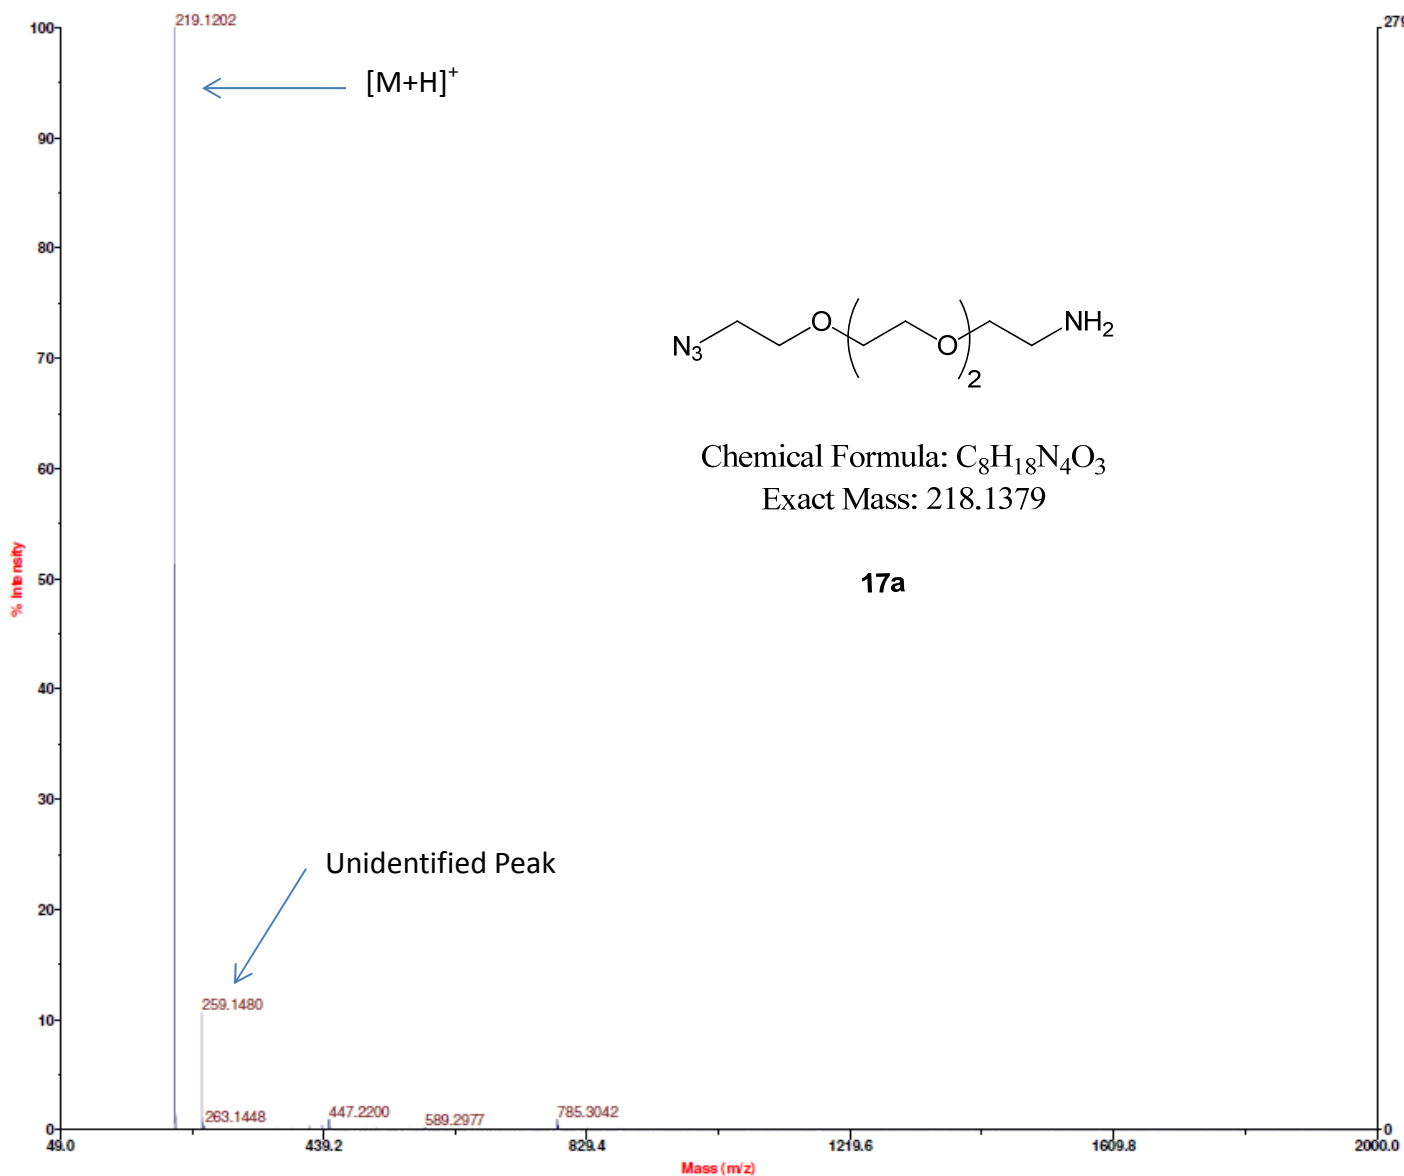

--> Mariner System State <--  
Instrument State ON  
Ion Polarity POS  
Auxiliary Gas ON  
Curtain Gas ON  
Nebulizer Gas ON  
Calibration Constant A 5.0146867E-007  
Calibration Constant B 77.798312  
TDC Deadtime 10  
--> Source Settings <--  
Spray Tip Potential 4509.96  
SCIEX Heater 300.05  
--> API Interface Settings <--  
Nozzle Potential 40.04  
Skimmer 1 Potential 10.01  
Quadrupole DC Potential 5.49  
Deflection Voltage 0.10  
Einzel Lens Potential -24.00  
Quadrupole RF Voltage 999.76  
Quadrupole Temperature 140.01  
Nozzle Temperature 140.01  
--> Analyzer Settings <--  
Push Pulse Potential 490.00  
Pull Pulse Potential 213.11  
Pull Bias Potential 10.00  
Acceleration Potential 3999.94  
Reflector Potential 1549.99  
Detector Voltage 1700.24  
--> Spectrum Acquisition Settings <--  
Seconds Per Spectrum 1.00  
Ion Count Threshold 0.00  
First Mass 50.00  
Last Mass 2000.00  
Accumulate Spectra OFF  
Standby at End of Acquisition OFF  
--> Centroid Spectra Settings <--  
Centroid Spectra OFF  
--> System Settings <--  
Gas Control Mode Manual  
Syringe Pump Mode Manual  
Syringe Pump Rate 50.00  
Syringe Diameter 3.26  
Min Analyzer Mass 50.00  
Max Analyzer Mass 4000.00

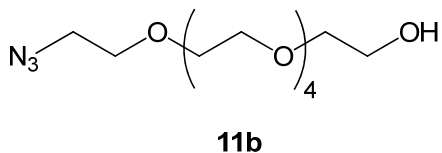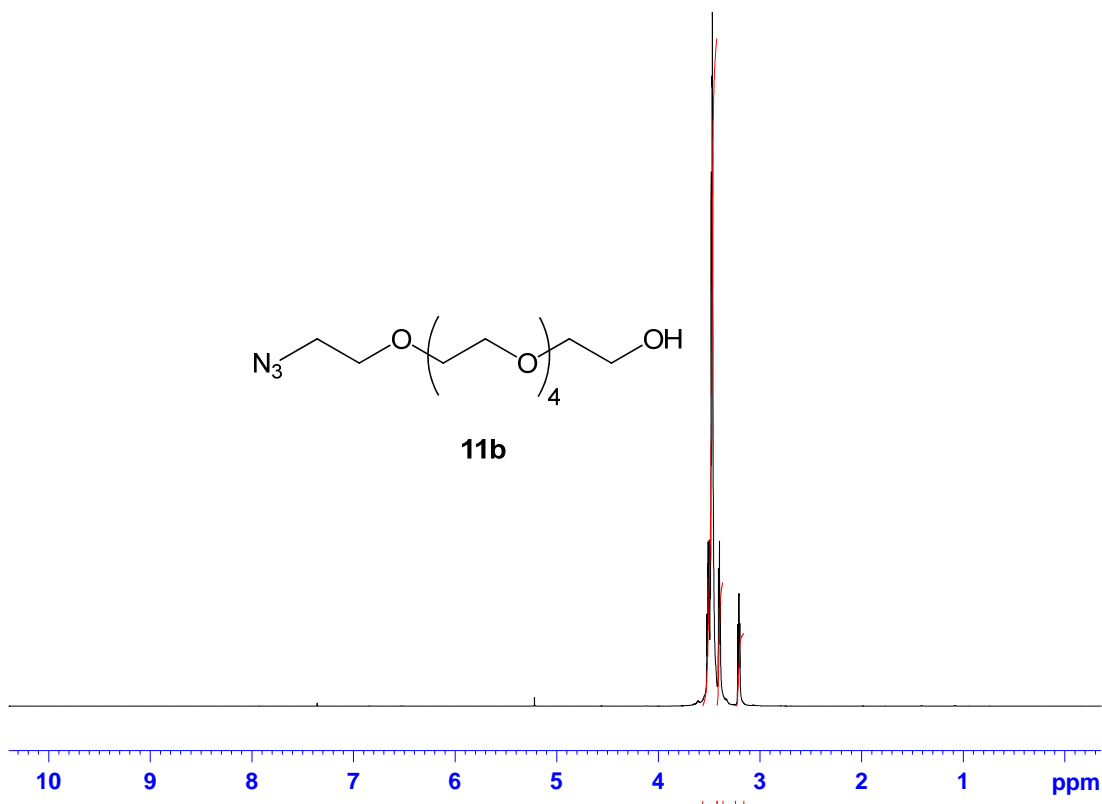

```

NAME      ZH3-143-C_N3-P6-OH
EXPNO    1
PROCNO   1
Date_    20111108
Time     21.08
INSTRUM  spect
PROBHD   5 mm PABBO BB-
PULPROG  zg30
TD       65536
SOLVENT  CDCl3
NS       16
DS       2
SWH      10000.000 Hz
FIDRES   0.152588 Hz
AQ       3.2769001 sec
RG       6.3
DW       50.000 usec
DE       6.50 usec
TE       294.2 K
D1       1.00000000 sec
TD0     1
    
```

```

===== CHANNEL f1 =====
NUC1     1H
P1       14.75 usec
PL1      1.20 dB
PL1W    17.72078514 W
SFO1    500.1330008 MHz
SI       32768
SF       500.1299631 MHz
WDW      EM
SSB      0
LB       0.30 Hz
GB       0
PC       1.00
    
```

77.84  
77.58  
77.32  
72.44  
70.33  
70.31  
70.27  
70.25  
70.04  
69.77  
61.20  
50.38

```

NAME      ZH3-143-C_N3-P6-OH
EXPNO    2
PROCNO   1
Date_    20111108
Time     22.05
INSTRUM  spect
PROBHD   5 mm PABBO BB-
PULPROG  zgpg30
TD       65536
SOLVENT  CDCl3
NS       1024
DS       4
SWH      28985.508 Hz
FIDRES   0.442284 Hz
AQ       1.1305633 sec
RG       4096
DW       17.250 usec
DE       6.50 usec
TE       296.4 K
D1       2.00000000 sec
D11      0.03000000 sec
TD0     1
    
```

```

===== CHANNEL f1 =====
NUC1     13C
P1       8.83 usec
PL1      0.00 dB
PL1W    80.88274384 W
SFO1    125.7709936 MHz
    
```

```

===== CHANNEL f2 =====
CPDPRG2  waltz16
NUC2     1H
PCPD2    80.00 usec
PL2      1.20 dB
PL12     15.40 dB
PL13     15.40 dB
PL2W    17.72078514 W
PL12W   0.67372549 W
PL13W   0.67372549 W
SFO2    500.1320005 MHz
SI       32768
SF       125.7577890 MHz
WDW      EM
SSB      0
LB       1.00 Hz
GB       0
PC       1.40
    
```

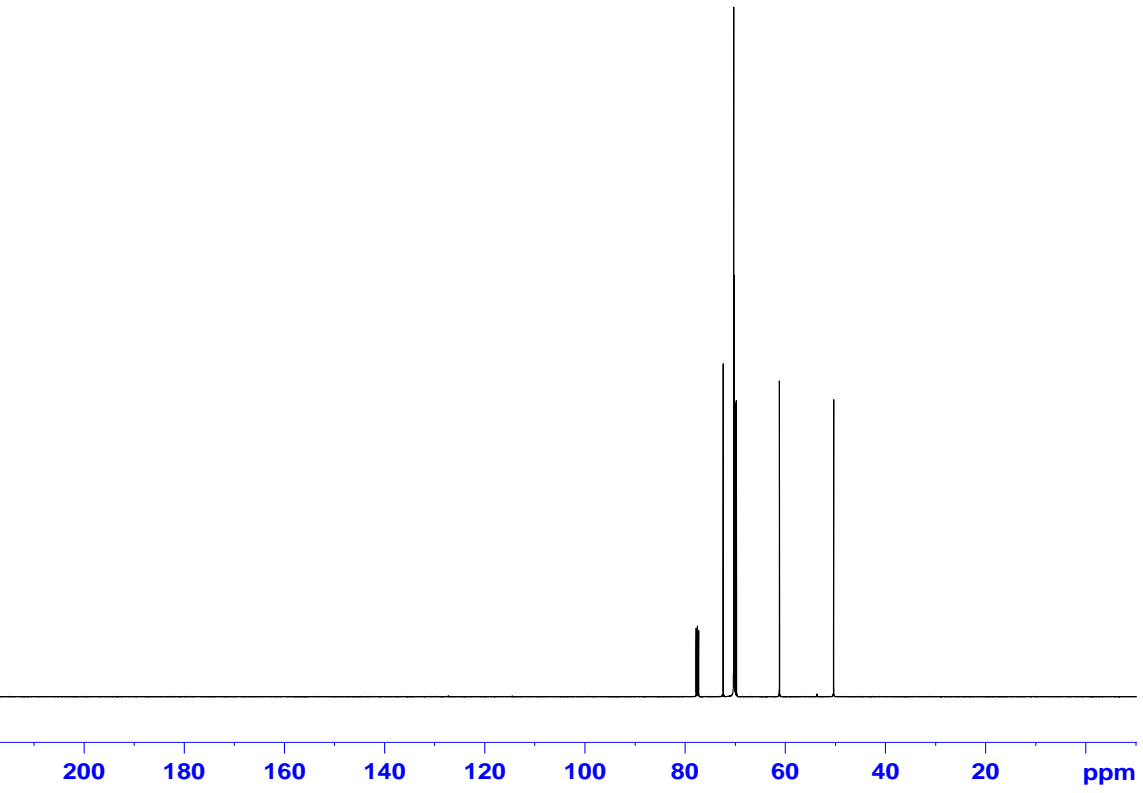

Mariner Spec /1:40 (T/0.00:0.70) ASC[BP = 330.1, 771]

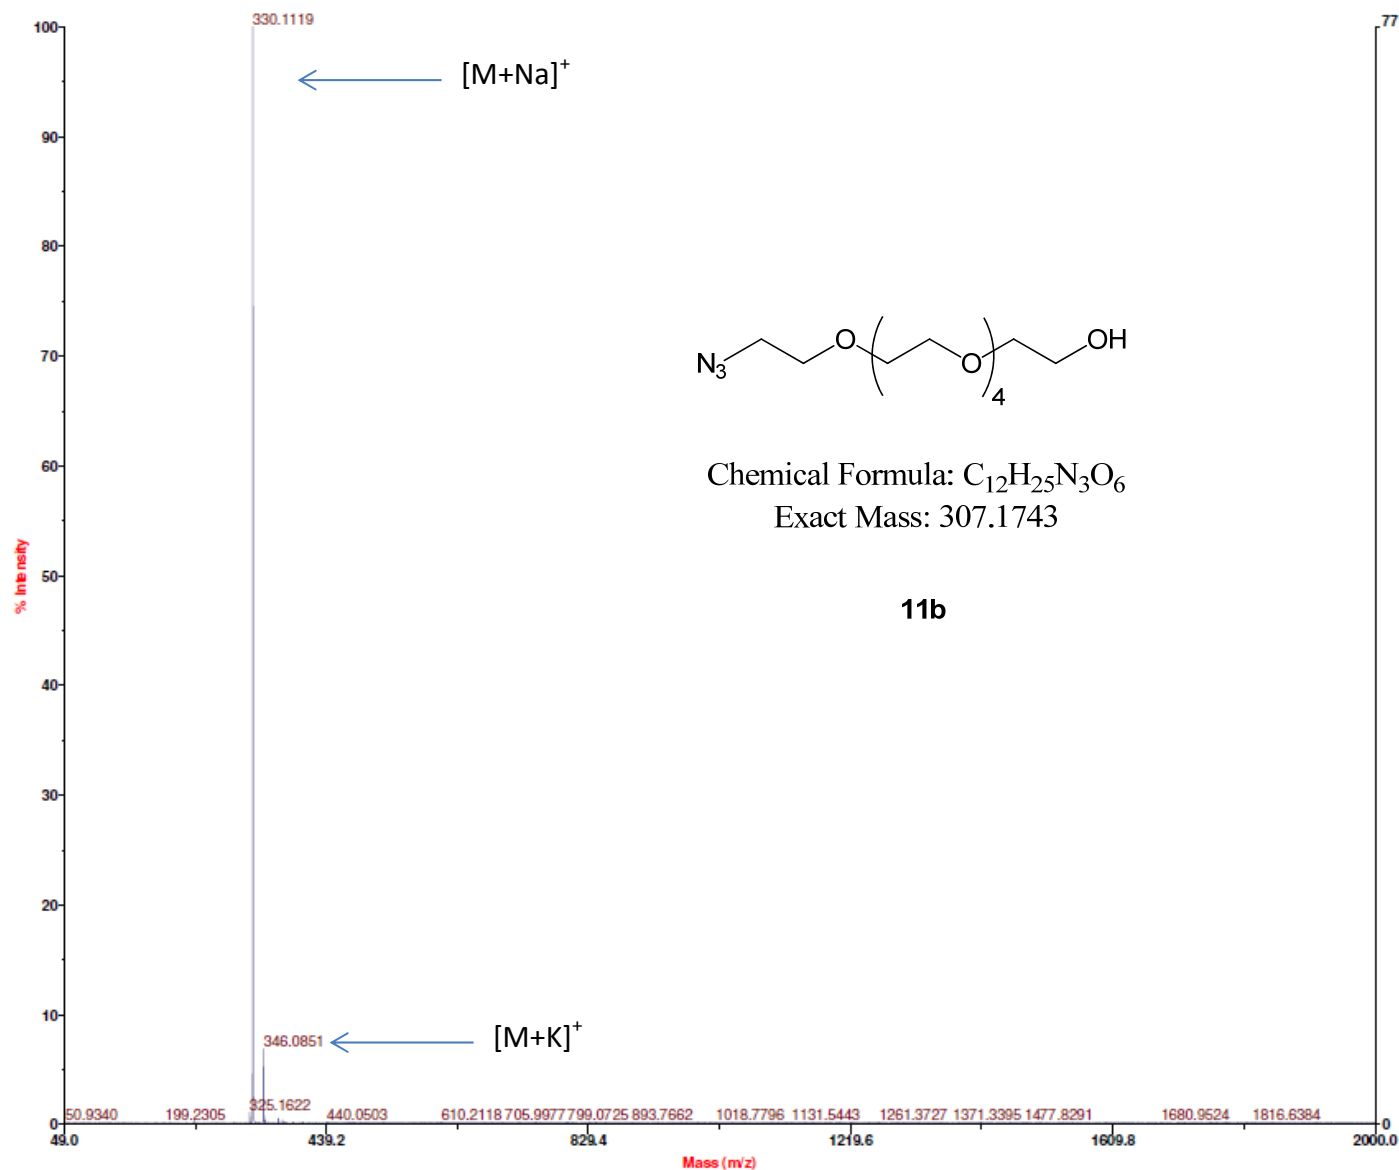

|                                       |                |
|---------------------------------------|----------------|
| --> Mariner System State <--          |                |
| Instrument State                      | ON             |
| Ion Polarity                          | POS            |
| Auxiliary Gas                         | ON             |
| Curtain Gas                           | ON             |
| Nebulizer Gas                         | ON             |
| Calibration Constant A                | 5.0146867E-007 |
| Calibration Constant B                | 77.798312      |
| TDC Deadtime                          | 10             |
| --> Source Settings <--               |                |
| Spray Tip Potential                   | 4509.96        |
| SCIEX Heater                          | 300.05         |
| --> API Interface Settings <--        |                |
| Nozzle Potential                      | 40.04          |
| Skimmer 1 Potential                   | 10.01          |
| Quadrupole DC Potential               | 5.49           |
| Deflection Voltage                    | 0.10           |
| Einzel Lens Potential                 | -24.00         |
| Quadrupole RF Voltage                 | 999.76         |
| Quadrupole Temperature                | 140.01         |
| Nozzle Temperature                    | 140.01         |
| --> Analyzer Settings <--             |                |
| Push Pulse Potential                  | 490.00         |
| Pull Pulse Potential                  | 213.11         |
| Pull Bias Potential                   | 10.00          |
| Acceleration Potential                | 3999.94        |
| Reflector Potential                   | 1549.99        |
| Detector Voltage                      | 1700.24        |
| --> Spectrum Acquisition Settings <-- |                |
| Seconds Per Spectrum                  | 1.00           |
| Ion Count Threshold                   | 0.00           |
| First Mass                            | 50.00          |
| Last Mass                             | 2000.00        |
| Accumulate Spectra                    | OFF            |
| Standby at End of Acquisition         | OFF            |
| --> Centroid Spectra Settings <--     |                |
| Centroid Spectra                      | OFF            |
| --> System Settings <--               |                |
| Gas Control Mode                      | Manual         |
| Syringe Pump Mode                     | Manual         |
| Syringe Pump Rate                     | 50.00          |
| Syringe Diameter                      | 3.26           |
| Min Analyzer Mass                     | 50.00          |
| Max Analyzer Mass                     | 4000.00        |

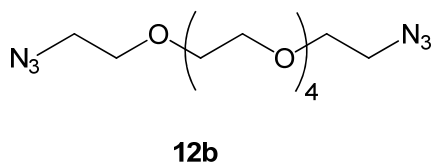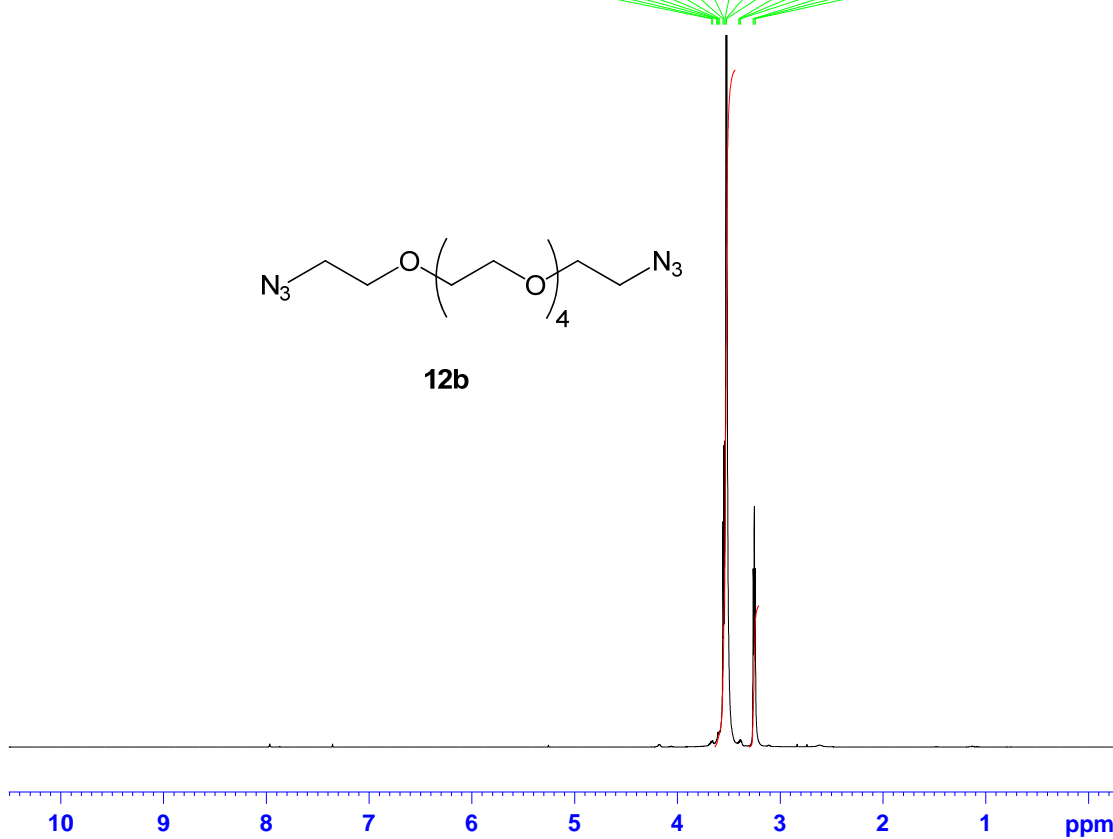

```

NAME      ZH3-143-A_N3-P6-N3
EXPNO     1
PROCNO    1
Date_     20111108
Time      19.09
INSTRUM   spect
PROBHD    5 mm PABBO BB-
PULPROG   zg30
TD        65536
SOLVENT   CDCl3
NS        16
DS        2
SWH       10000.000 Hz
FIDRES    0.152588 Hz
AQ        3.2769001 sec
RG        7.1
DW        50.000 usec
DE        6.50 usec
TE        294.0 K
D1        1.00000000 sec
TD0       1
    
```

```

===== CHANNEL f1 =====
NUC1      1H
P1        14.75 usec
PL1       1.20 dB
PL1W     17.72078514 W
SFO1     500.1330008 MHz
SI        32768
SF        500.1299631 MHz
WDW       EM
SSB       0
LB        0.30 Hz
GB        0
PC        1.00
    
```

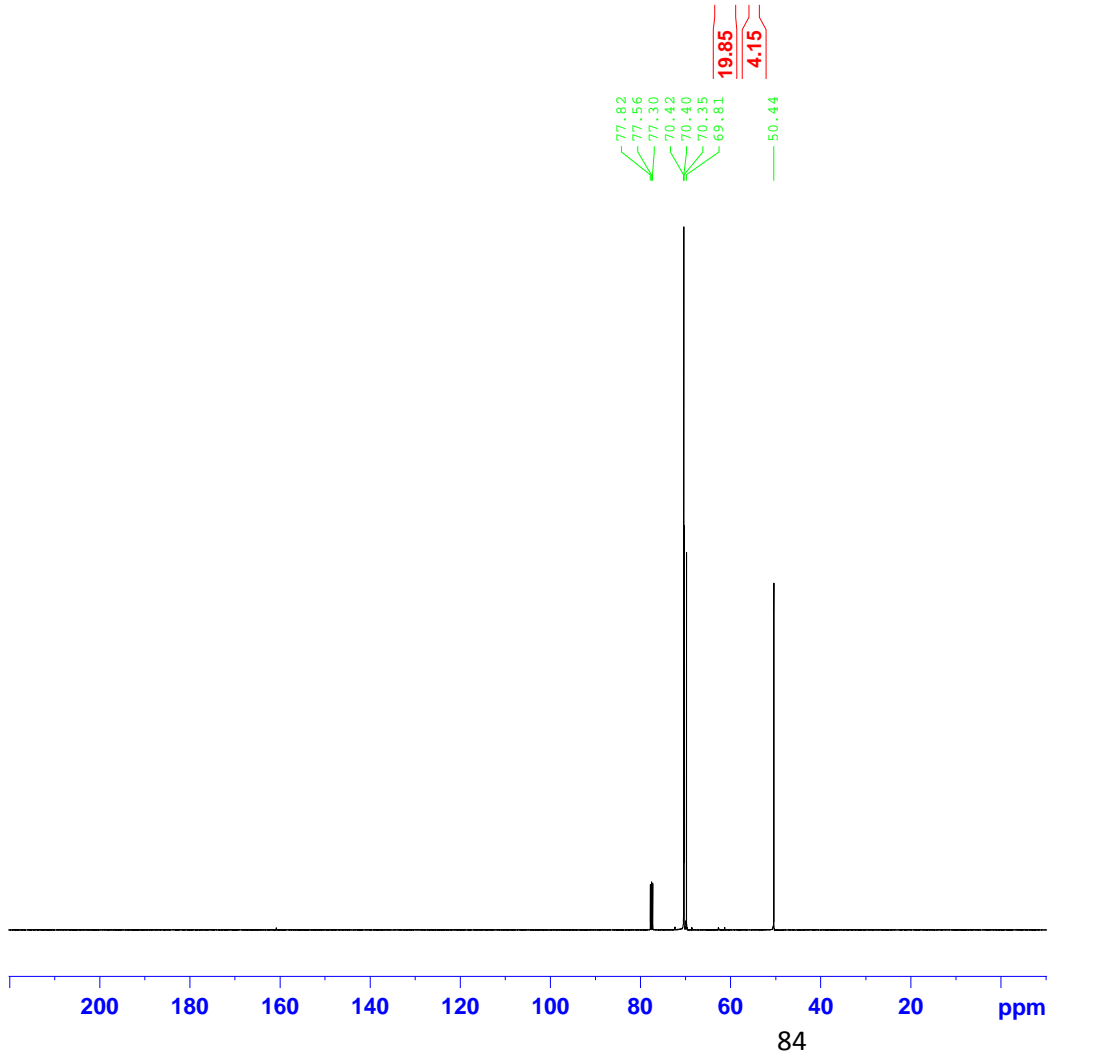

```

NAME      ZH3-143-A_N3-P6-N3
EXPNO     2
PROCNO    1
Date_     20111108
Time      20.05
INSTRUM   spect
PROBHD    5 mm PABBO BB-
PULPROG   zgpg30
TD        65536
SOLVENT   CDCl3
NS        1024
DS        4
SWH       28985.508 Hz
FIDRES    0.442284 Hz
AQ        1.1305633 sec
RG        4096
DW        17.250 usec
DE        6.50 usec
TE        296.4 K
D1        2.00000000 sec
D11       0.03000000 sec
TD0       1
    
```

```

===== CHANNEL f1 =====
NUC1      13C
P1        8.83 usec
PL1       0.00 dB
PL1W     80.88274384 W
SFO1     125.7709936 MHz
    
```

```

===== CHANNEL f2 =====
CPDPRG2   waltz16
NUC2      1H
PCPD2     80.00 usec
PL2       1.20 dB
PL12     15.40 dB
PL13     15.40 dB
PL2W     17.72078514 W
PL12W    0.67372549 W
PL13W    0.67372549 W
SFO2     500.1320005 MHz
SI        32768
SF        125.7577890 MHz
WDW       EM
SSB       0
LB        1.00 Hz
GB        0
PC        1.40
    
```



## Applied Biosystems Mariner System 5268

Mariner Spec /1:46 (T/0.00:0.81) ASC[BP = 355.1, 4044]

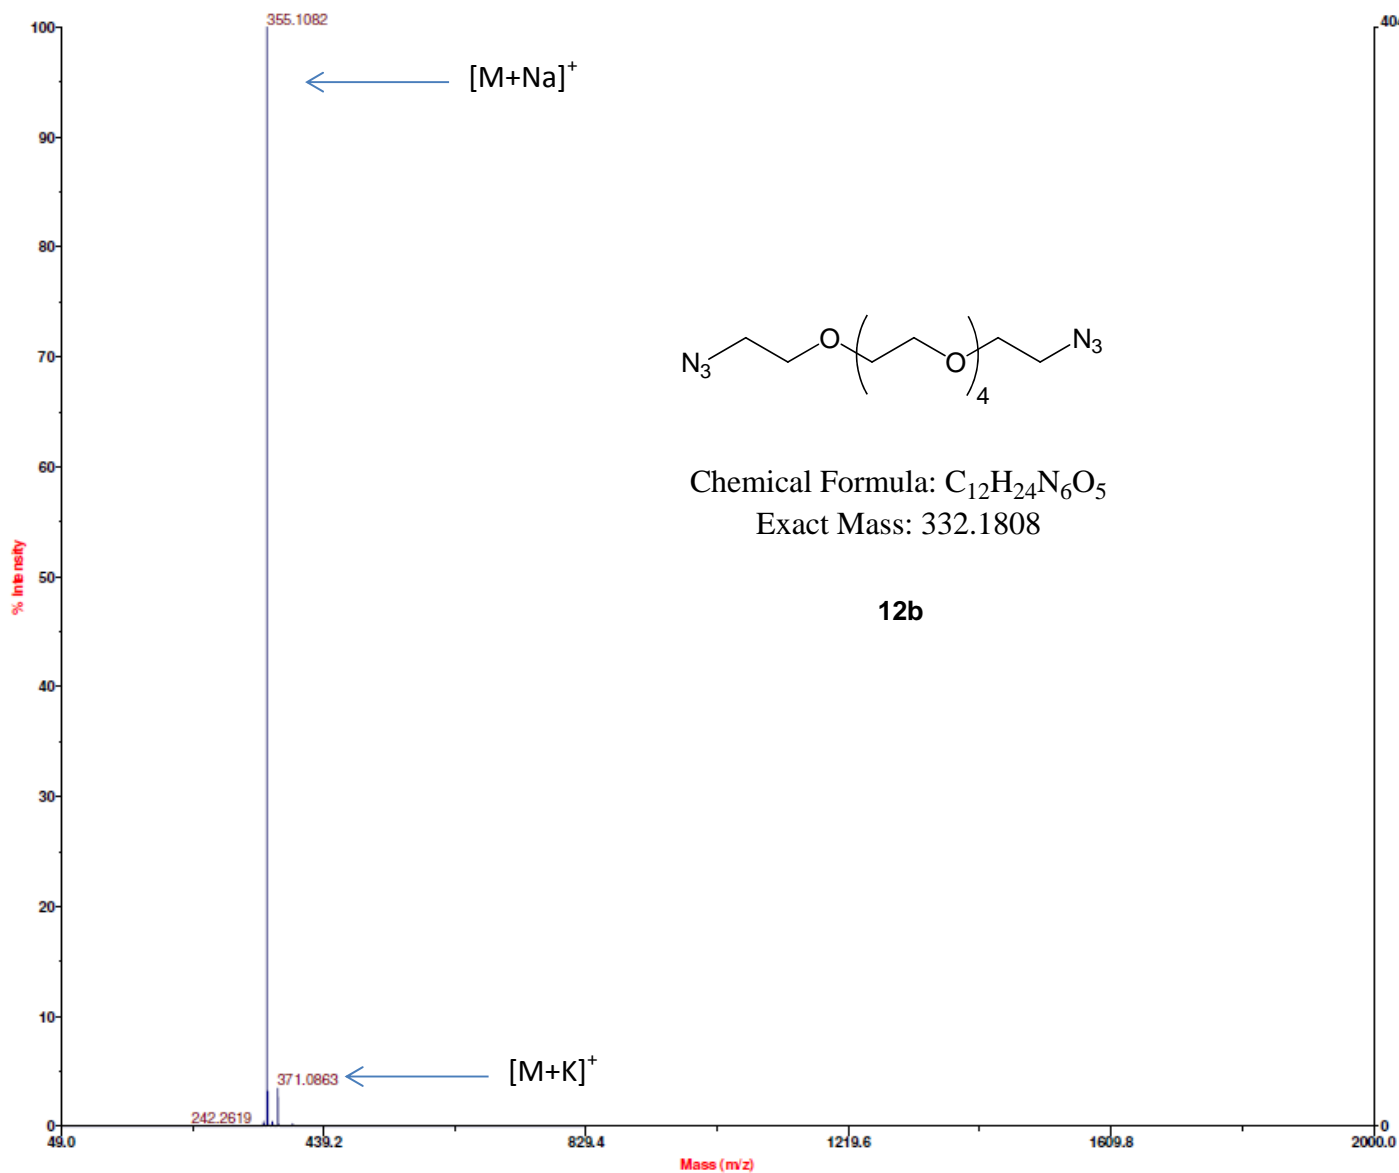

```
--> Mariner System State <--
Instrument State           ON
Ion Polarity              POS
Auxillary Gas             ON
Curtain Gas              ON
Nebulizer Gas            ON
Calibration Constant A   5.0146867E-007
Calibration Constant B   77.798312
TDC Deadtime             10
--> Source Settings <--
Spray Tip Potential       4509.96
SCIEX Heater             300.05
--> API Interface Settings <--
Nozzle Potential         40.04
Skimmer 1 Potential     10.01
Quadrupole DC Potential  5.49
Deflection Voltage       0.10
Einzel Lens Potential    -24.00
Quadrupole RF Voltage    999.76
Quadrupole Temperature  140.01
Nozzle Temperature      140.01
--> Analyzer Settings <--
Push Pulse Potential     490.00
Pull Pulse Potential     213.11
Pull Bias Potential      10.00
Acceleration Potential  3999.94
Reflector Potential     1549.99
Detector Voltage        1700.24
--> Spectrum Acquisition Settings <--
Seconds Per Spectrum     1.00
Ion Count Threshold      0.00
First Mass               50.00
Last Mass                2000.00
Accumulate Spectra      OFF
Standby at End of Acquisition OFF
--> Centroid Spectra Settings <--
Centroid Spectra        OFF
--> System Settings <--
Gas Control Mode        Manual
Syringe Pump Mode      Manual
Syringe Pump Rate      50.00
Syringe Diameter       3.26
Min Analyzer Mass      50.00
Max Analyzer Mass      4000.00
```

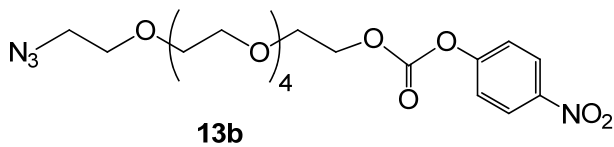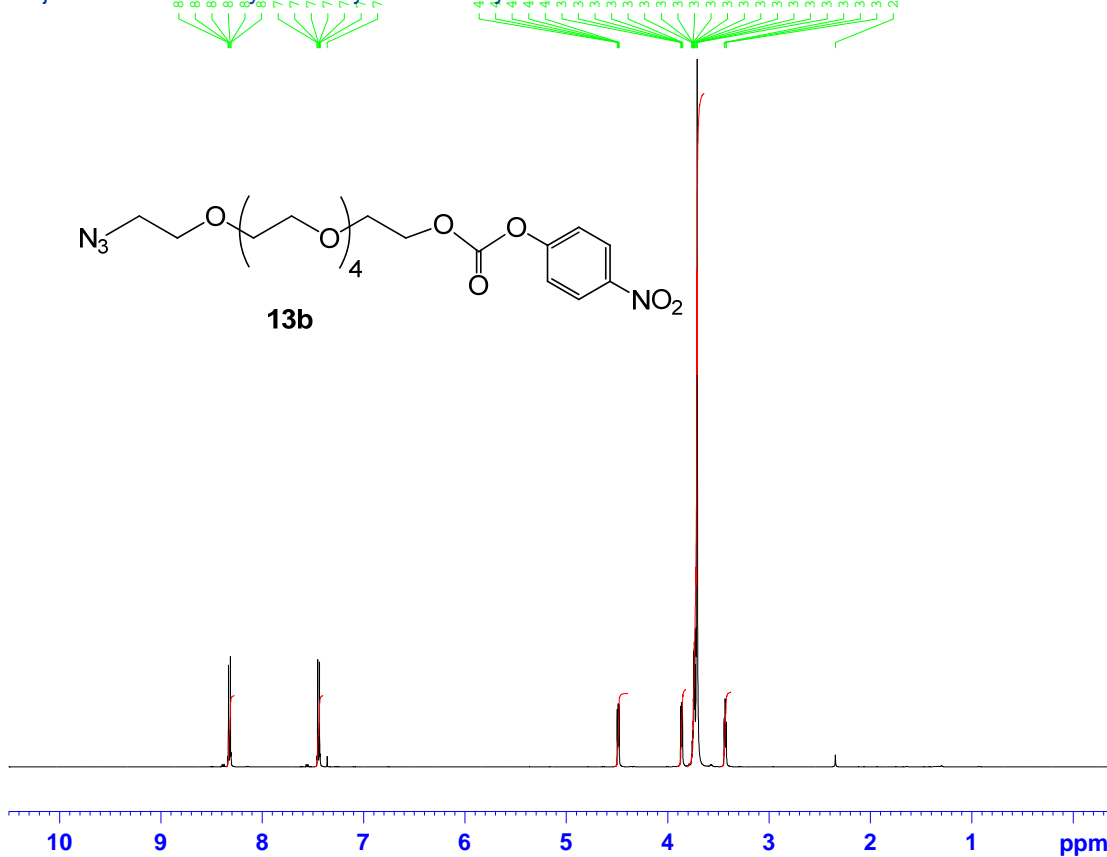

```

NAME      LG-835_N3-P6-PNPC
EXPNO     1
PROCNO    1
Date_     20111201
Time      21.32
INSTRUM   spect
PROBHD    5 mm PABBO BB-
PULPROG   zg30
TD        65536
SOLVENT   CDC13
NS        64
DS        2
SWH       10000.000 Hz
FIDRES    0.152588 Hz
AQ        3.2769001 sec
RG        25.4
DW        50.000 usec
DE        6.50 usec
TE        300.0 K
D1        1.00000000 sec
TD0       1
    
```

```

===== CHANNEL f1 =====
NUC1      1H
P1        14.75 usec
PL1       1.20 dB
PL1W      17.72078514 W
SFO1     500.1330008 MHz
SI        32768
SF        500.1299631 MHz
WDW       EM
SSB       0
LB        0.30 Hz
GB        0
PC        1.00
    
```

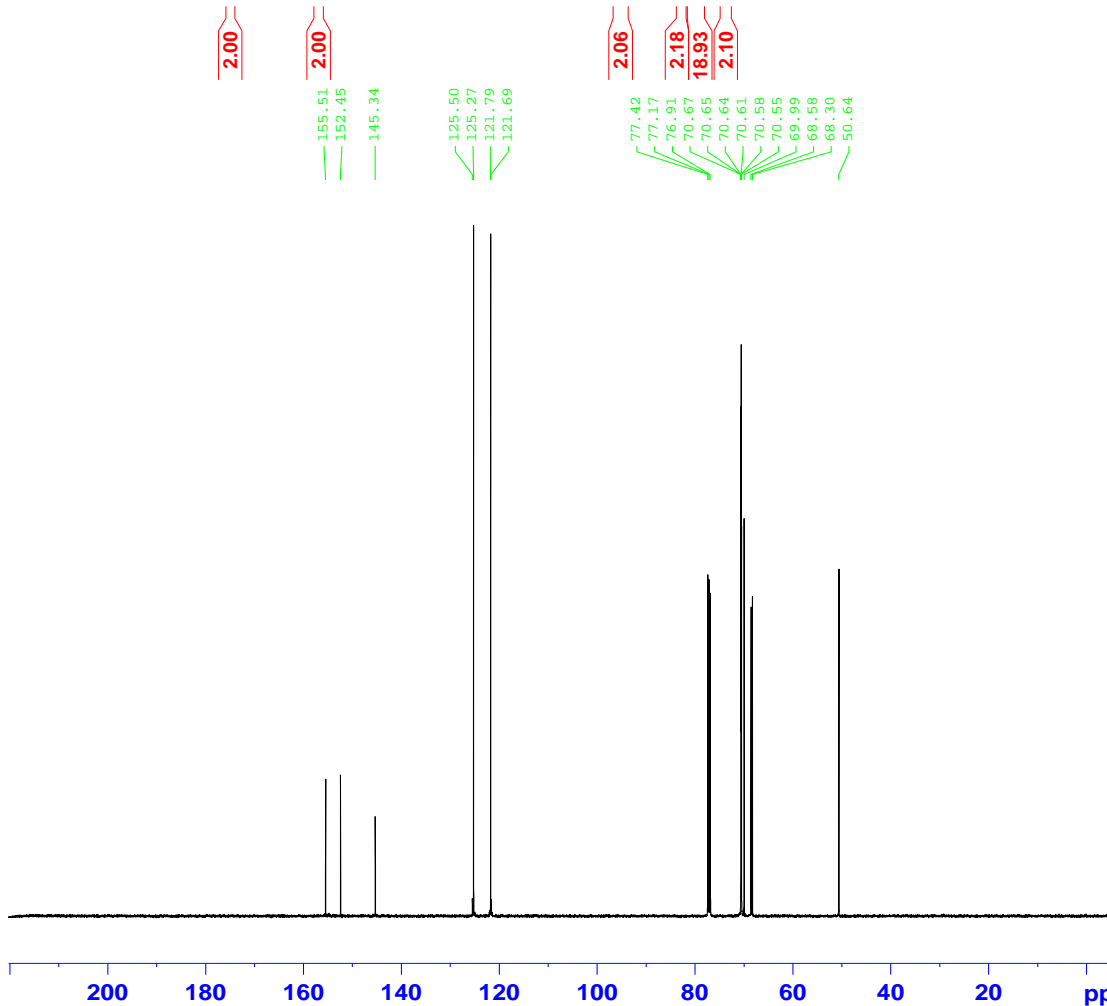

```

NAME      LG-835_N3-P6-PNPC
EXPNO     2
PROCNO    1
Date_     20111201
Time      22.28
INSTRUM   spect
PROBHD    5 mm PABBO BB-
PULPROG   zgpg30
TD        65536
SOLVENT   CDC13
NS        1024
DS        4
SWH       28985.508 Hz
FIDRES    0.442284 Hz
AQ        1.1305633 sec
RG        4096
DW        17.250 usec
DE        6.50 usec
TE        300.0 K
D1        2.00000000 sec
D11       0.03000000 sec
TD0       1
    
```

```

===== CHANNEL f1 =====
NUC1      13C
P1        8.83 usec
PL1       0.00 dB
PL1W      80.88274384 W
SFO1     125.7709936 MHz
    
```

```

===== CHANNEL f2 =====
CPDPRG2   waltz16
NUC2      1H
PCPD2     80.00 usec
PL2       1.20 dB
PL12      15.40 dB
PL13      15.40 dB
PL2W      17.72078514 W
PL12W     0.67372549 W
PL13W     0.67372549 W
SFO2     500.1320005 MHz
SI        32768
SF        125.7577890 MHz
WDW       EM
SSB       0
LB        1.00 Hz
GB        0
PC        1.40
    
```

Mariner Spec /1:23 (T/0.00:0.39) ASC[BP = 479.1, 383]

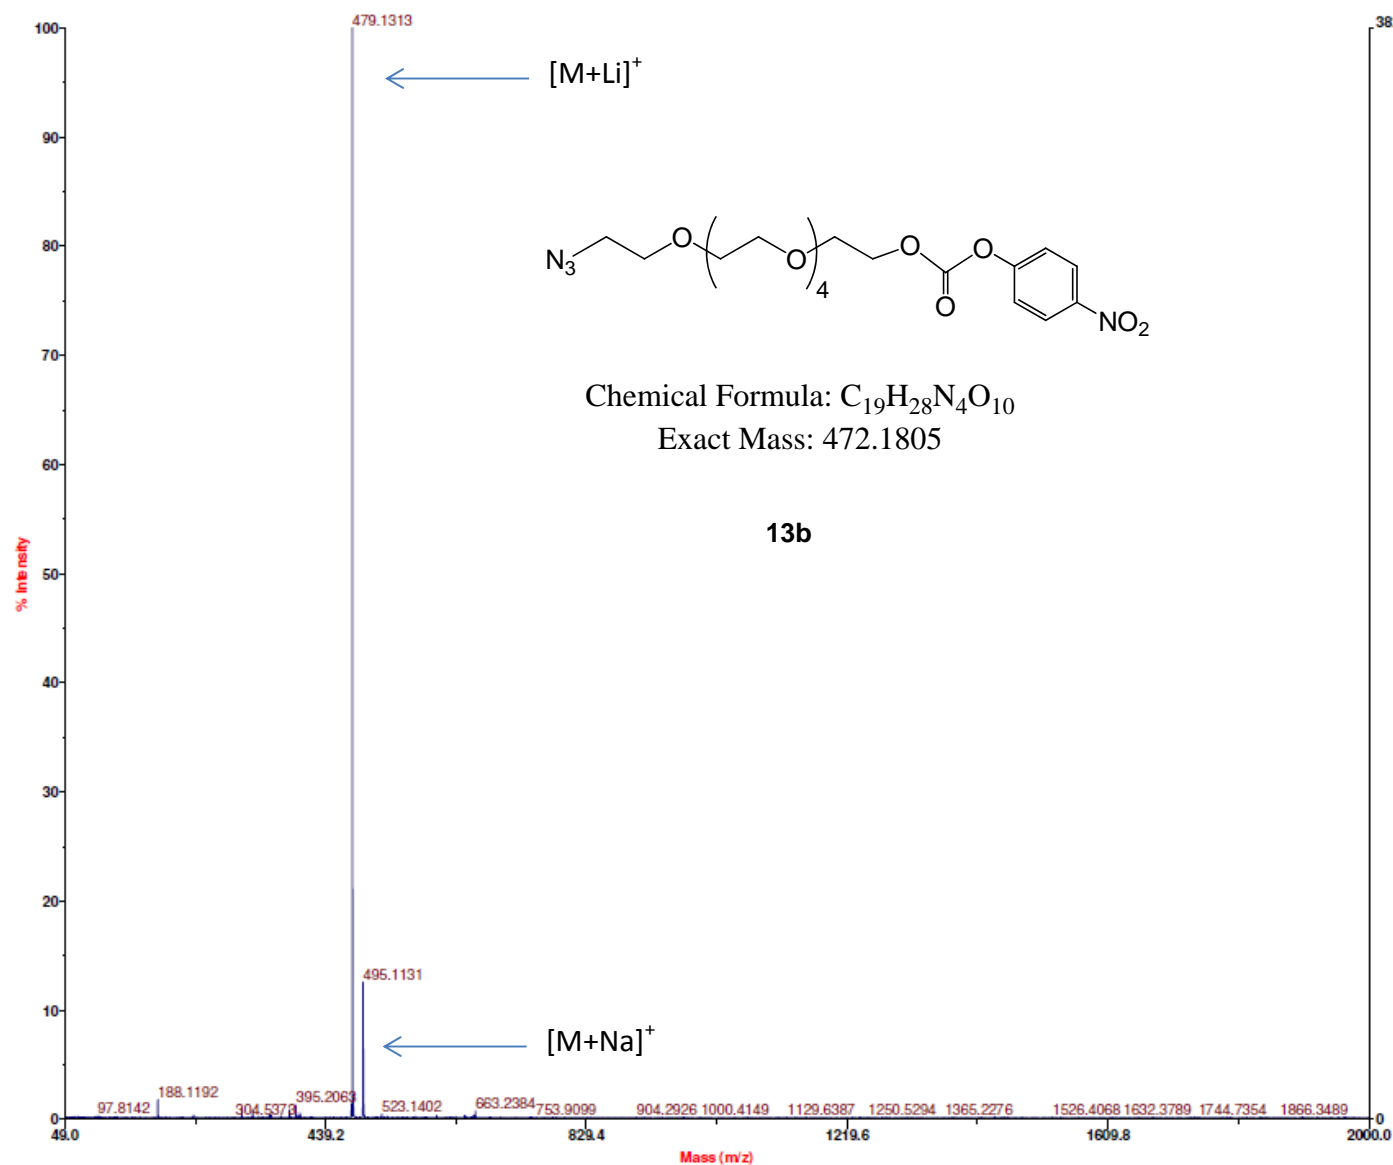

```
--> Mariner System State <--
Instrument State      ON
Ion Polarity         POS
Auxiliary Gas        ON
Curtain Gas          ON
Nebulizer Gas        ON
Calibration Constant A  5.0146867E-007
Calibration Constant B  77.798312
TDC Deadtime         10
--> Source Settings <--
Spray Tip Potential   4509.96
SCIEX Heater         300.05
--> API Interface Settings <--
Nozzle Potential     40.04
Skimmer 1 Potential  10.01
Quadrupole DC Potential  5.49
Deflection Voltage    0.10
Einzel Lens Potential -24.00
Quadrupole RF Voltage 999.76
Quadrupole Temperature 140.01
Nozzle Temperature   140.01
--> Analyzer Settings <--
Push Pulse Potential  490.00
Pull Pulse Potential  213.11
Pull Bias Potential   10.00
Acceleration Potential 3999.94
Reflector Potential   1549.99
Detector Voltage      1700.24
--> Spectrum Acquisition Settings <--
Seconds Per Spectrum  1.00
Ion Count Threshold   0.00
First Mass            50.00
Last Mass             2000.00
Accumulate Spectra   OFF
Standby at End of Acquisition OFF
--> Centroid Spectra Settings <--
Centroid Spectra     OFF
--> System Settings <--
Gas Control Mode     Manual
Syringe Pump Mode    Manual
Syringe Pump Rate    50.00
Syringe Diameter     3.26
Min Analyzer Mass    50.00
Max Analyzer Mass    4000.00
```

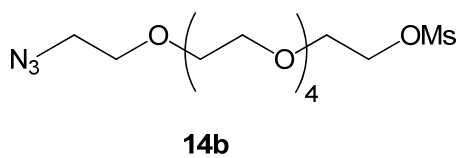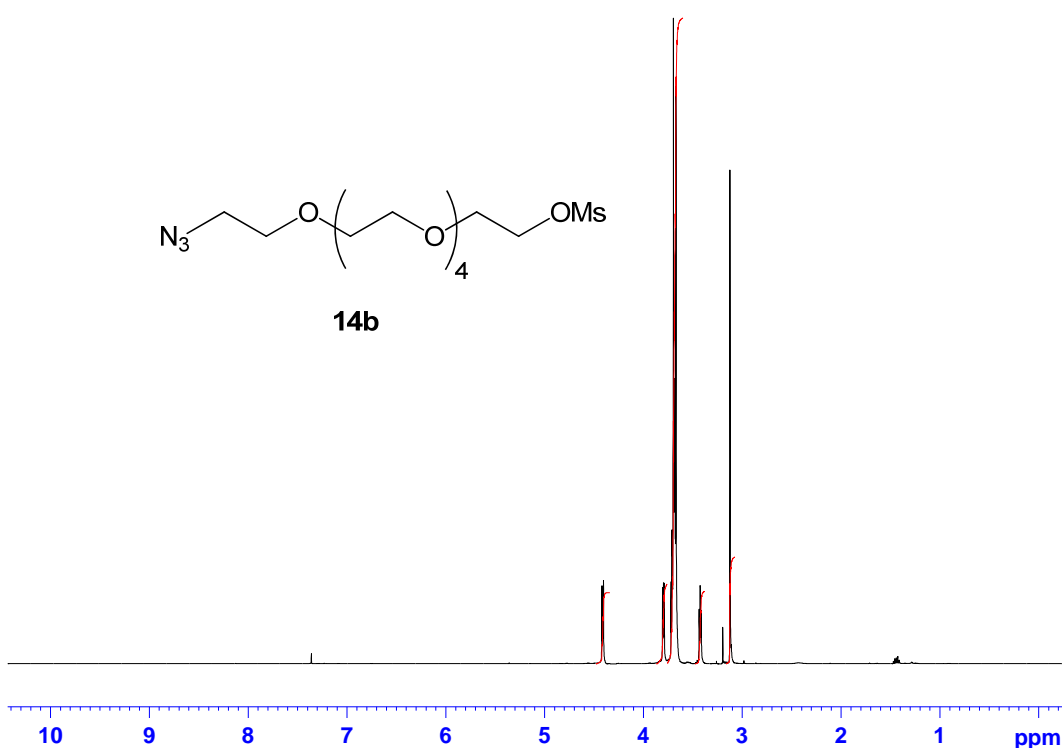

```

NAME      ZH3-144_N3-P6-OMs
EXPNO     1
PROCNO    1
Date_     20111206
Time      19.07
INSTRUM   spect
PROBHD    5 mm PABBO BB-
PULPROG   zg30
TD         65536
SOLVENT   CDC13
NS         16
DS         2
SWH       10000.000 Hz
FIDRES    0.152588 Hz
AQ         3.2769001 sec
RG         22.6
DW         50.000 usec
DE         6.50 usec
TE         294.2 K
D1         1.00000000 sec
TD0        1
    
```

```

===== CHANNEL f1 =====
NUC1      1H
P1        14.75 usec
PL1       1.20 dB
PL1W      17.72078514 W
SFO1      500.1330008 MHz
SI        32768
SF        500.1299631 MHz
WDW       EM
SSB       0
LB        0.30 Hz
GB        0
PC        1.00
    
```

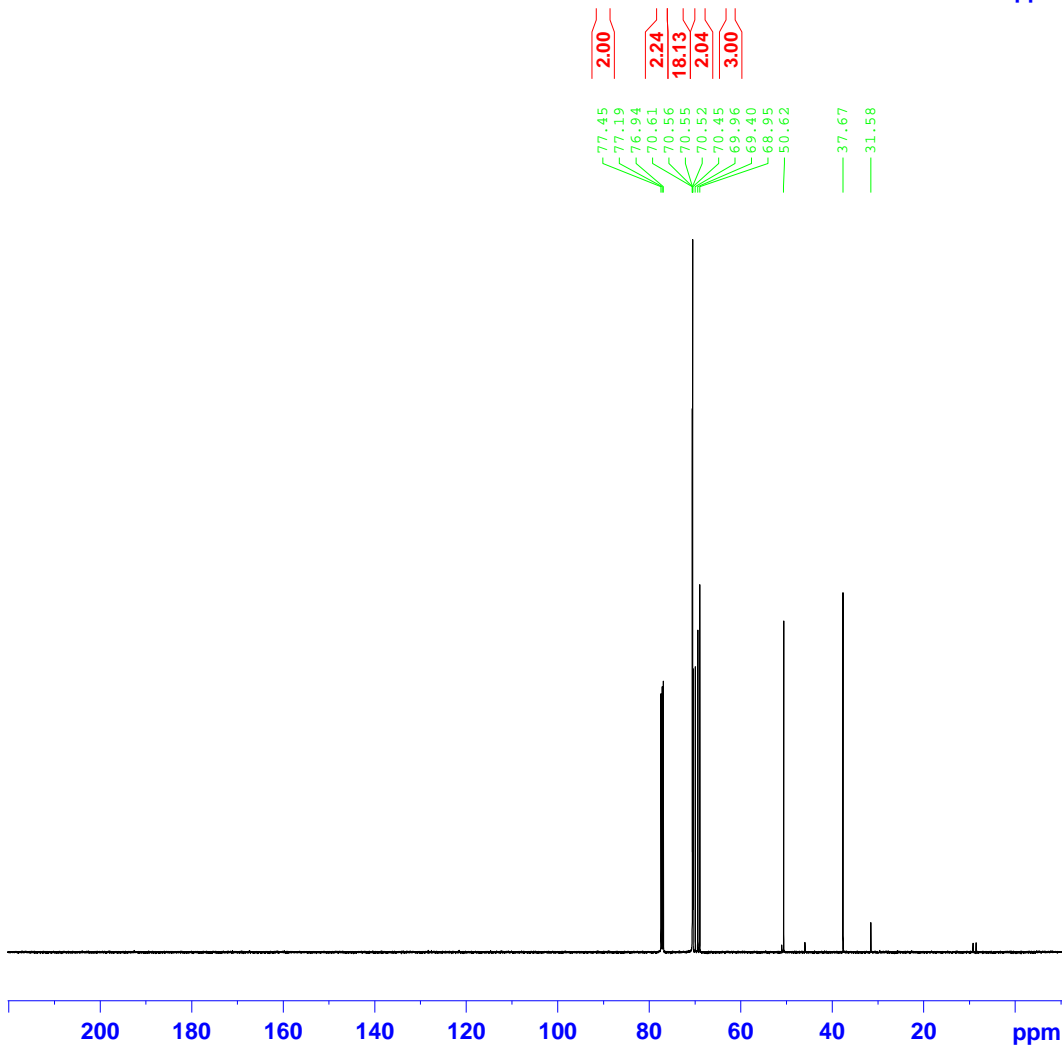

```

NAME      ZH3-144_N3-P6-OMs
EXPNO     2
PROCNO    1
Date_     20111206
Time      20.04
INSTRUM   spect
PROBHD    5 mm PABBO BB-
PULPROG   zgpg30
TD         65536
SOLVENT   CDC13
NS         1024
DS         4
SWH       28985.508 Hz
FIDRES    0.442284 Hz
AQ         1.1305633 sec
RG         4096
DW         17.250 usec
DE         6.50 usec
TE         296.7 K
D1         2.00000000 sec
D11        0.03000000 sec
TD0        1
    
```

```

===== CHANNEL f1 =====
NUC1      13C
P1         8.83 usec
PL1        0.00 dB
PL1W       80.88274384 W
SFO1      125.7709936 MHz
    
```

```

===== CHANNEL f2 =====
CPDPRG2   waltz16
NUC2      1H
PCPD2     80.00 usec
PL2        1.20 dB
PL12       15.40 dB
PL13       15.40 dB
PL2W      17.72078514 W
PL12W     0.67372549 W
PL13W     0.67372549 W
SFO2      500.1320005 MHz
SI        32768
SF        125.7577890 MHz
WDW       EM
SSB       0
LB        1.00 Hz
GB        0
PC        1.40
    
```



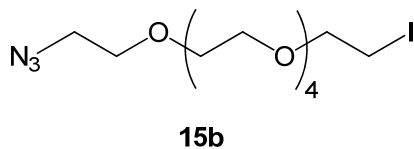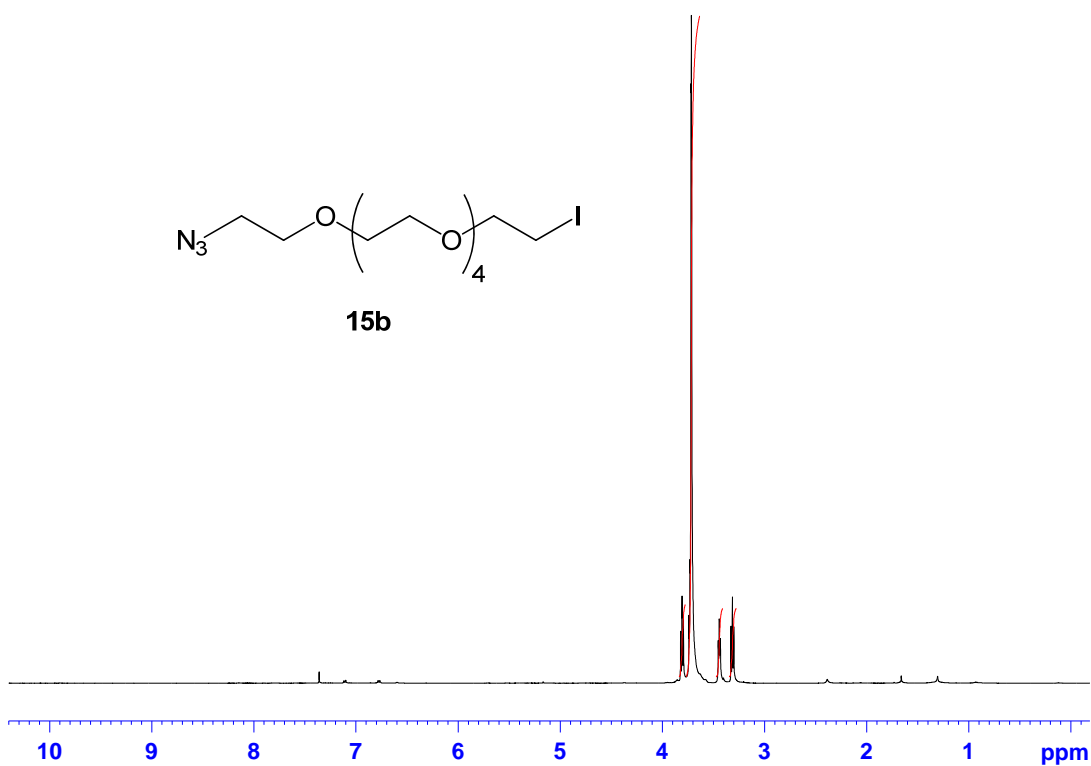

```

NAME      ZH3-145_N3-P6-I
EXPNO     1
PROCNO    1
Date_     20111207
Time      20.24
INSTRUM   spect
PROBHD    5 mm PABBO BB-
PULPROG   zg30
TD         65536
SOLVENT   CDC13
NS         16
DS         2
SWH       10000.000 Hz
FIDRES    0.152588 Hz
AQ         3.2769001 sec
RG         25.4
DW         50.000 usec
DE         6.50 usec
TE         294.8 K
D1         1.00000000 sec
TD0        1
    
```

```

===== CHANNEL f1 =====
NUC1      1H
P1        14.75 usec
PL1       1.20 dB
PL1W      17.72078514 W
SFO1      500.1330008 MHz
SI        32768
SF        500.1299631 MHz
WDW       EM
SSB       0
LB        0.30 Hz
GB        0
PC        1.00
    
```

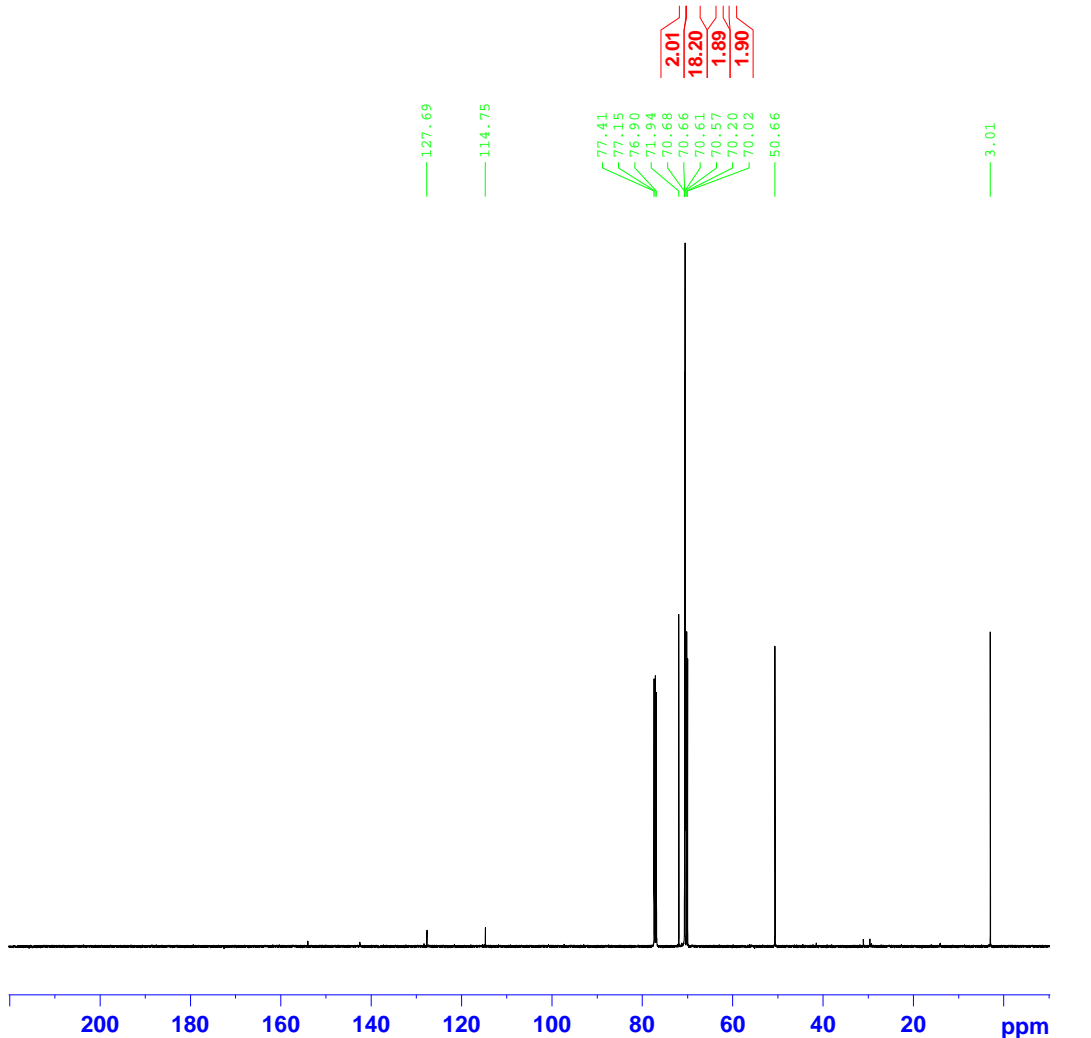

```

NAME      ZH3-145_N3-P6-I
EXPNO     2
PROCNO    1
Date_     20111207
Time      21.21
INSTRUM   spect
PROBHD    5 mm PABBO BB-
PULPROG   zgpg30
TD         65536
SOLVENT   CDC13
NS         1024
DS         4
SWH       28985.508 Hz
FIDRES    0.442284 Hz
AQ         1.1305633 sec
RG         4096
DW         17.250 usec
DE         6.50 usec
TE         296.9 K
D1         2.00000000 sec
D11        0.03000000 sec
TD0        1
    
```

```

===== CHANNEL f1 =====
NUC1      13C
P1        8.83 usec
PL1       0.00 dB
PL1W      80.88274384 W
SFO1      125.7709936 MHz
    
```

```

===== CHANNEL f2 =====
CPDPRG2   waltz16
NUC2      1H
PCPD2     80.00 usec
PL2       1.20 dB
PL12      15.40 dB
PL13      15.40 dB
PL2W      17.72078514 W
PL12W     0.67372549 W
PL13W     0.67372549 W
SFO2      500.1320005 MHz
SI        32768
SF        125.7577890 MHz
WDW       EM
SSB       0
LB        1.00 Hz
GB        0
PC        1.40
    
```

Mariner Spec /1:27 (T/0.00:0.46) ASC[BP = 440.0, 137]

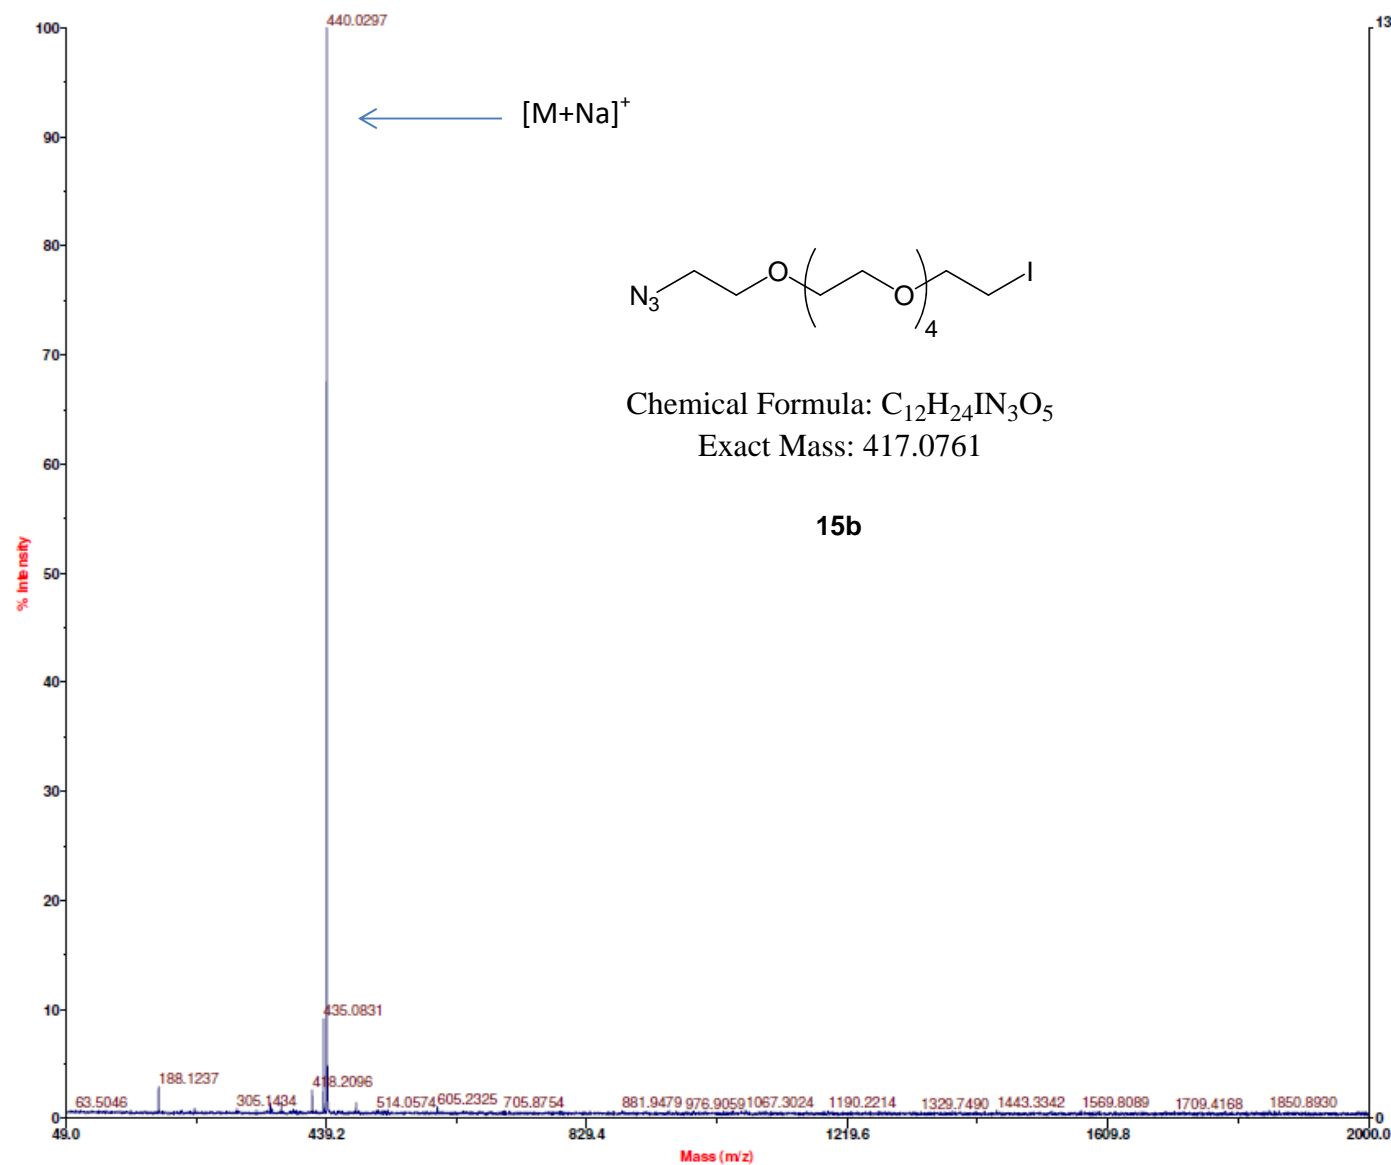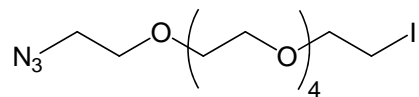

Chemical Formula:  $C_{12}H_{24}IN_3O_5$   
Exact Mass: 417.0761

15b

|                                       |                |
|---------------------------------------|----------------|
| --> Mariner System State <--          |                |
| Instrument State                      | ON             |
| Ion Polarity                          | POS            |
| Auxiliary Gas                         | ON             |
| Curtain Gas                           | ON             |
| Nebulizer Gas                         | ON             |
| Calibration Constant A                | 5.0146867E-007 |
| Calibration Constant B                | 77.798312      |
| TDC Deadtime                          | 10             |
| --> Source Settings <--               |                |
| Spray Tip Potential                   | 4509.96        |
| SCIEX Heater                          | 300.05         |
| --> API Interface Settings <--        |                |
| Nozzle Potential                      | 40.04          |
| Skimmer 1 Potential                   | 10.01          |
| Quadrupole DC Potential               | 5.49           |
| Deflection Voltage                    | 0.10           |
| Einzel Lens Potential                 | -24.00         |
| Quadrupole RF Voltage                 | 999.76         |
| Quadrupole Temperature                | 140.01         |
| Nozzle Temperature                    | 140.01         |
| --> Analyzer Settings <--             |                |
| Push Pulse Potential                  | 490.00         |
| Pull Pulse Potential                  | 213.11         |
| Pull Bias Potential                   | 10.00          |
| Acceleration Potential                | 3999.94        |
| Reflector Potential                   | 1549.99        |
| Detector Voltage                      | 1700.24        |
| --> Spectrum Acquisition Settings <-- |                |
| Seconds Per Spectrum                  | 1.00           |
| Ion Count Threshold                   | 0.00           |
| First Mass                            | 50.00          |
| Last Mass                             | 2000.00        |
| Accumulate Spectra                    | OFF            |
| Standby at End of Acquisition         | OFF            |
| --> Centroid Spectra Settings <--     |                |
| Centroid Spectra                      | OFF            |
| --> System Settings <--               |                |
| Gas Control Mode                      | Manual         |
| Syringe Pump Mode                     | Manual         |
| Syringe Pump Rate                     | 50.00          |
| Syringe Diameter                      | 3.26           |
| Min Analyzer Mass                     | 50.00          |
| Max Analyzer Mass                     | 4000.00        |

Acquired: Dec 08 09:07:00 2011  
Mariner Mass Spectrum  
C:\Mariner\Data\2011\Dec\08 Thur\ZH3-145001.dat

Printed: 09:08, December 08, 2011

```

NAME      ZH3-146_N3-P6-NPth
EXPNO     1
PROCNO    1
Date_     20111207
Time      22.21
INSTRUM   spect
PROBHD    5 mm PABBO BB-
PULPROG   zg30
TD         65536
SOLVENT   CDCl3
NS         16
DS         2
SWH        10000.000 Hz
FIDRES     0.152588 Hz
AQ         3.2769001 sec
RG         25.4
DW         50.000 usec
DE         6.50 usec
TE         294.5 K
D1         1.00000000 sec
TD0        1
    
```

```

===== CHANNEL f1 =====
NUC1      1H
P1         14.75 usec
PL1        1.20 dB
PL1W       17.72078514 W
SF01      500.1330008 MHz
SI         32768
SF         500.1299631 MHz
WDW        EM
SSB         0
LB         0.30 Hz
GB         0
PC         1.00
    
```

```

NAME      ZH3-146_N3-P6-NPth
EXPNO     2
PROCNO    1
Date_     20111207
Time      23.17
INSTRUM   spect
PROBHD    5 mm PABBO BB-
PULPROG   zgpg30
TD         65536
SOLVENT   CDCl3
NS         1024
DS         4
SWH        28985.508 Hz
FIDRES     0.442284 Hz
AQ         1.1305633 sec
RG         4096
DW         17.250 usec
DE         6.50 usec
TE         296.8 K
D1         2.00000000 sec
D11        0.03000000 sec
TD0        1
    
```

```

===== CHANNEL f1 =====
NUC1      13C
P1         8.83 usec
PL1         0.00 dB
PL1W       80.88274384 W
SF01      125.7709936 MHz
    
```

```

===== CHANNEL f2 =====
CPDPRG2   waltz16
NUC2      1H
PCPD2     80.00 usec
PL2        1.20 dB
PL12       15.40 dB
PL13       15.40 dB
PL2W       17.72078514 W
PL12W      0.67372549 W
PL13W      0.67372549 W
SF02      500.1320005 MHz
SI         32768
SF         125.7577890 MHz
WDW        EM
SSB         0
LB         1.00 Hz
GB         0
PC         1.40
    
```

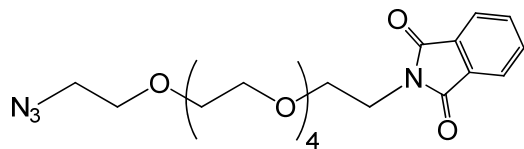

16b

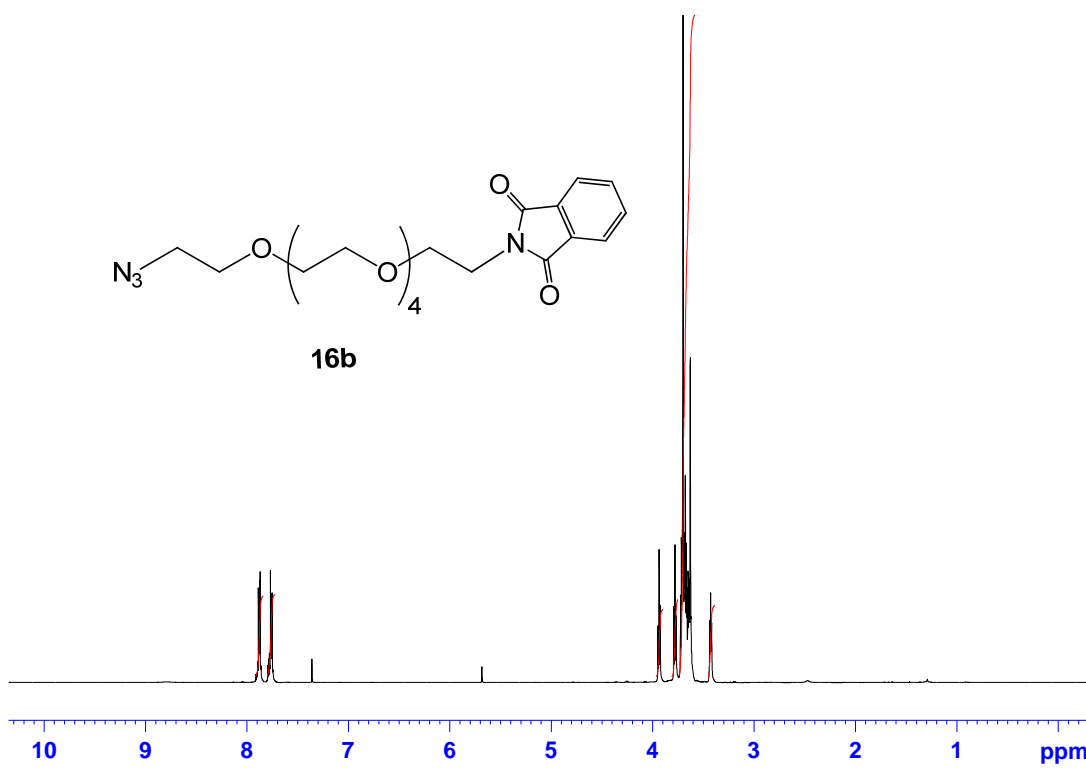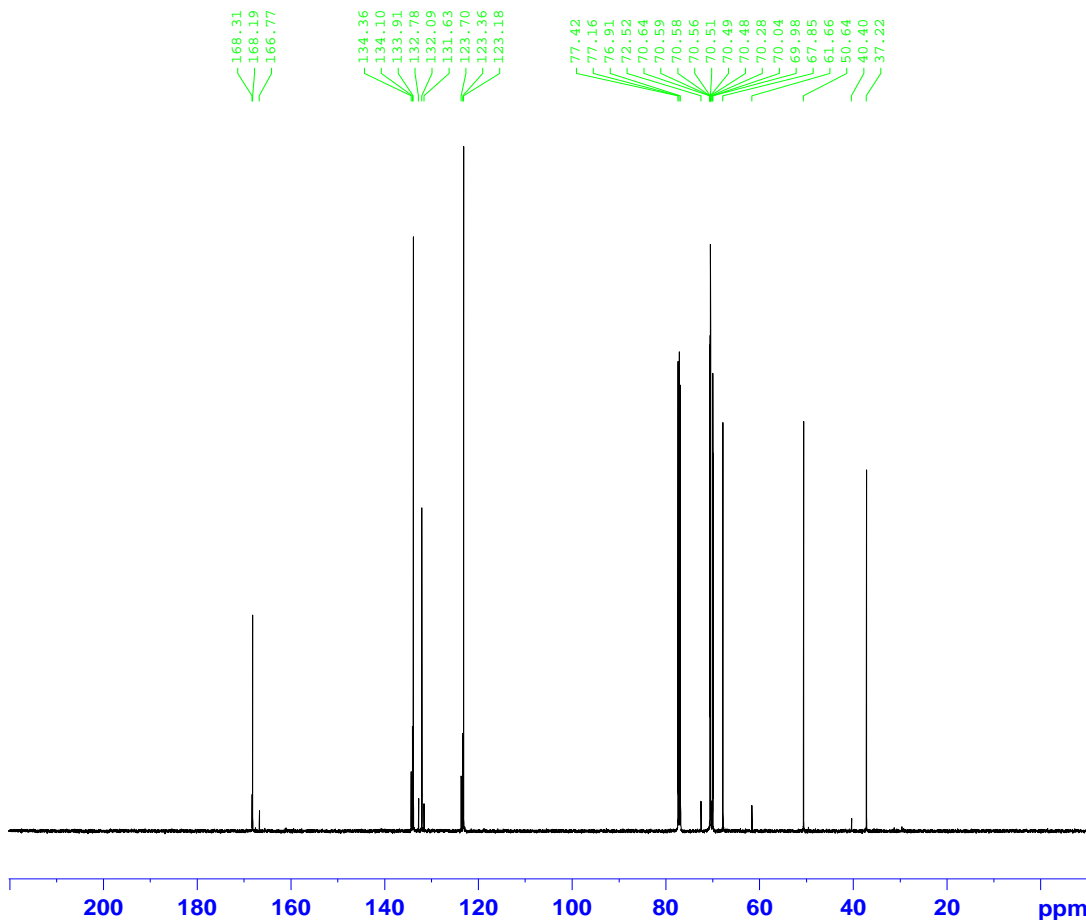



Mariner Spec /1:52 (T/0.00:0.91) ASC[BP = 459.1, 276]

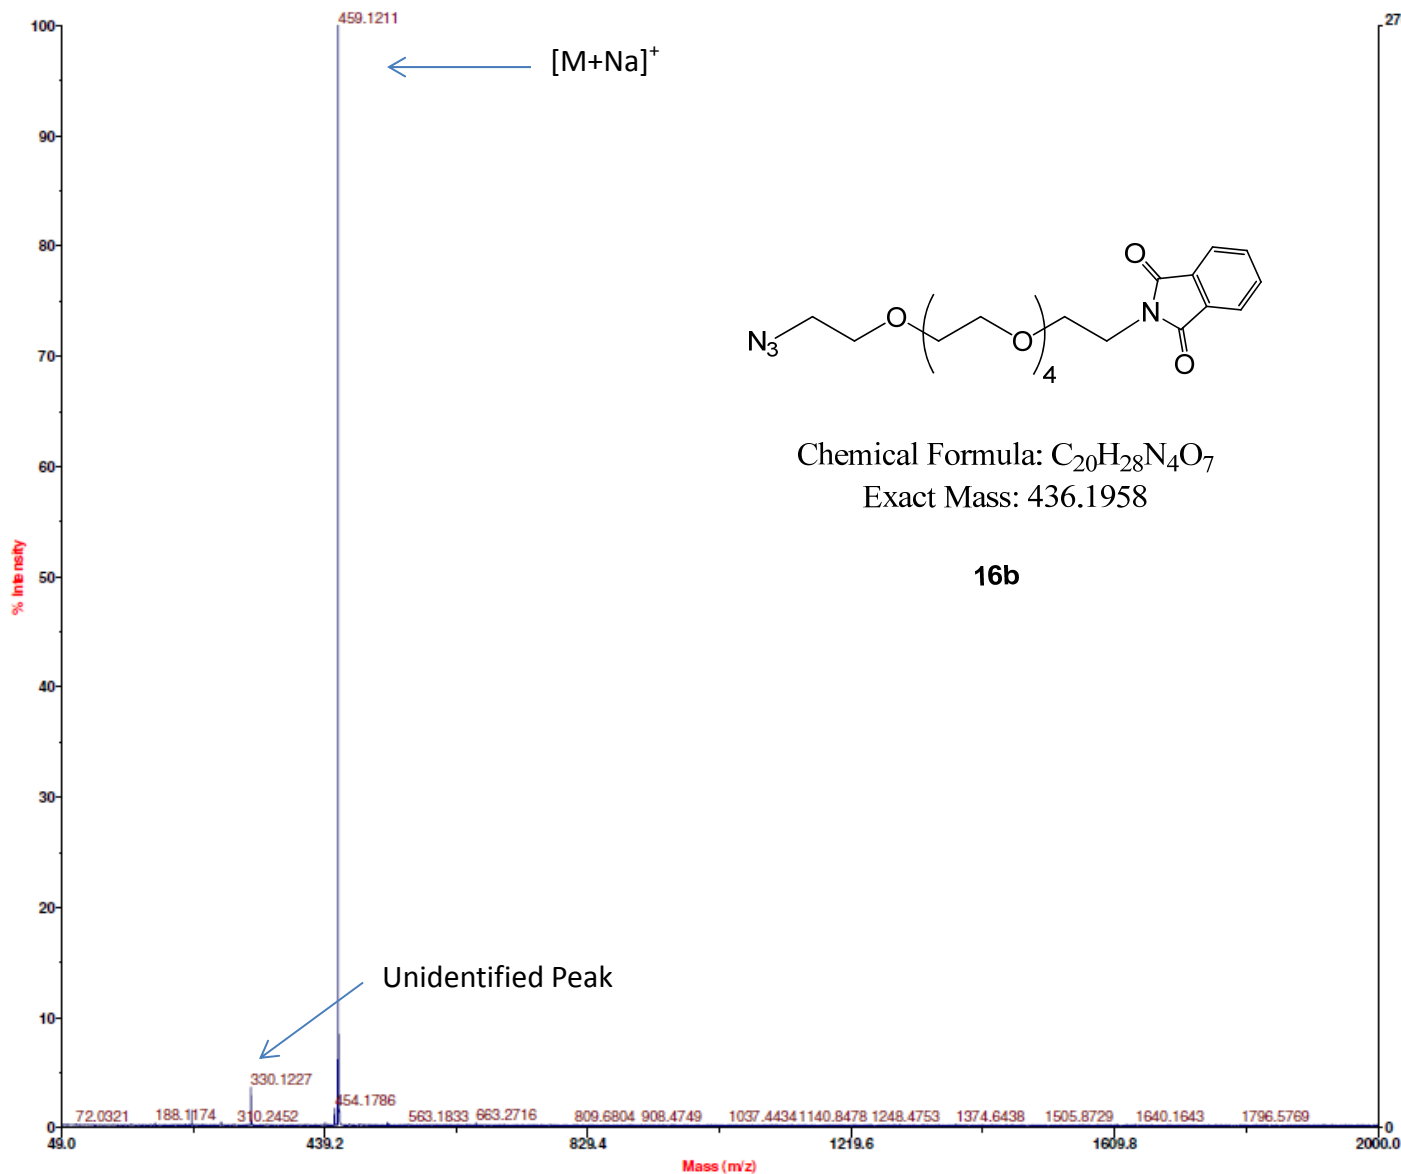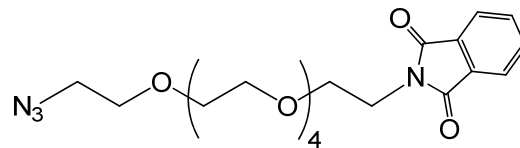

Chemical Formula:  $C_{20}H_{28}N_4O_7$   
Exact Mass: 436.1958

16b

|                                       |                |
|---------------------------------------|----------------|
| --> Mariner System State <--          |                |
| Instrument State                      | ON             |
| Ion Polarity                          | POS            |
| Auxiliary Gas                         | ON             |
| Curtain Gas                           | ON             |
| Nebulizer Gas                         | ON             |
| Calibration Constant A                | 5.0146867E-007 |
| Calibration Constant B                | 77.798312      |
| TDC Deadtime                          | 10             |
| --> Source Settings <--               |                |
| Spray Tip Potential                   | 4509.96        |
| SCIEX Heater                          | 300.05         |
| --> API Interface Settings <--        |                |
| Nozzle Potential                      | 40.04          |
| Skimmer 1 Potential                   | 10.01          |
| Quadrupole DC Potential               | 5.49           |
| Deflection Voltage                    | 0.10           |
| Einzel Lens Potential                 | -24.00         |
| Quadrupole RF Voltage                 | 999.76         |
| Quadrupole Temperature                | 140.01         |
| Nozzle Temperature                    | 140.01         |
| --> Analyzer Settings <--             |                |
| Push Pulse Potential                  | 490.00         |
| Pull Pulse Potential                  | 213.11         |
| Pull Bias Potential                   | 10.00          |
| Acceleration Potential                | 3999.94        |
| Reflector Potential                   | 1549.99        |
| Detector Voltage                      | 1700.24        |
| --> Spectrum Acquisition Settings <-- |                |
| Seconds Per Spectrum                  | 1.00           |
| Ion Count Threshold                   | 0.00           |
| First Mass                            | 50.00          |
| Last Mass                             | 2000.00        |
| Accumulate Spectra                    | OFF            |
| Standby at End of Acquisition         | OFF            |
| --> Centroid Spectra Settings <--     |                |
| Centroid Spectra                      | OFF            |
| --> System Settings <--               |                |
| Gas Control Mode                      | Manual         |
| Syringe Pump Mode                     | Manual         |
| Syringe Pump Rate                     | 50.00          |
| Syringe Diameter                      | 3.26           |
| Min Analyzer Mass                     | 50.00          |
| Max Analyzer Mass                     | 4000.00        |

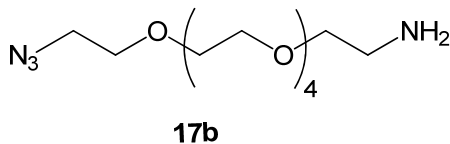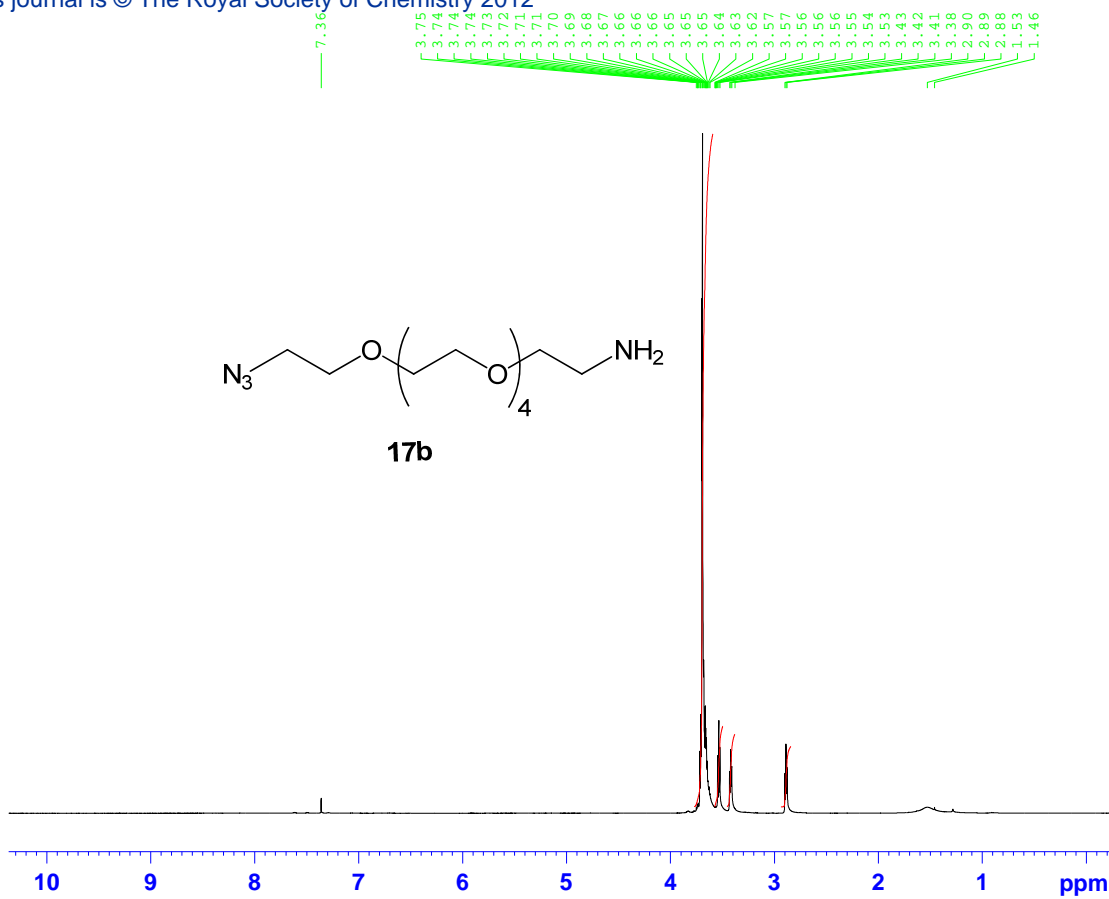

```

NAME      ZH3-147_N3-P6-NH2
EXPNO    1
PROCNO   1
Date_    20111208
Time     0.18
INSTRUM  spect
PROBHD   5 mm PABBO BB-
PULPROG  zg30
TD       65536
SOLVENT  CDCl3
NS       16
DS       2
SWH      10000.000 Hz
FIDRES   0.152588 Hz
AQ       3.2769001 sec
RG       25.4
DW       50.000 usec
DE       6.50 usec
TE       294.4 K
D1       1.00000000 sec
TD0      1
    
```

```

===== CHANNEL f1 =====
NUC1     1H
P1       14.75 usec
PL1      1.20 dB
PL1W    17.72078514 W
SF01    500.1330008 MHz
SI       32768
SF       500.1299631 MHz
WDW      EM
SSB      0
LB       0.30 Hz
GB       0
PC       1.00
    
```

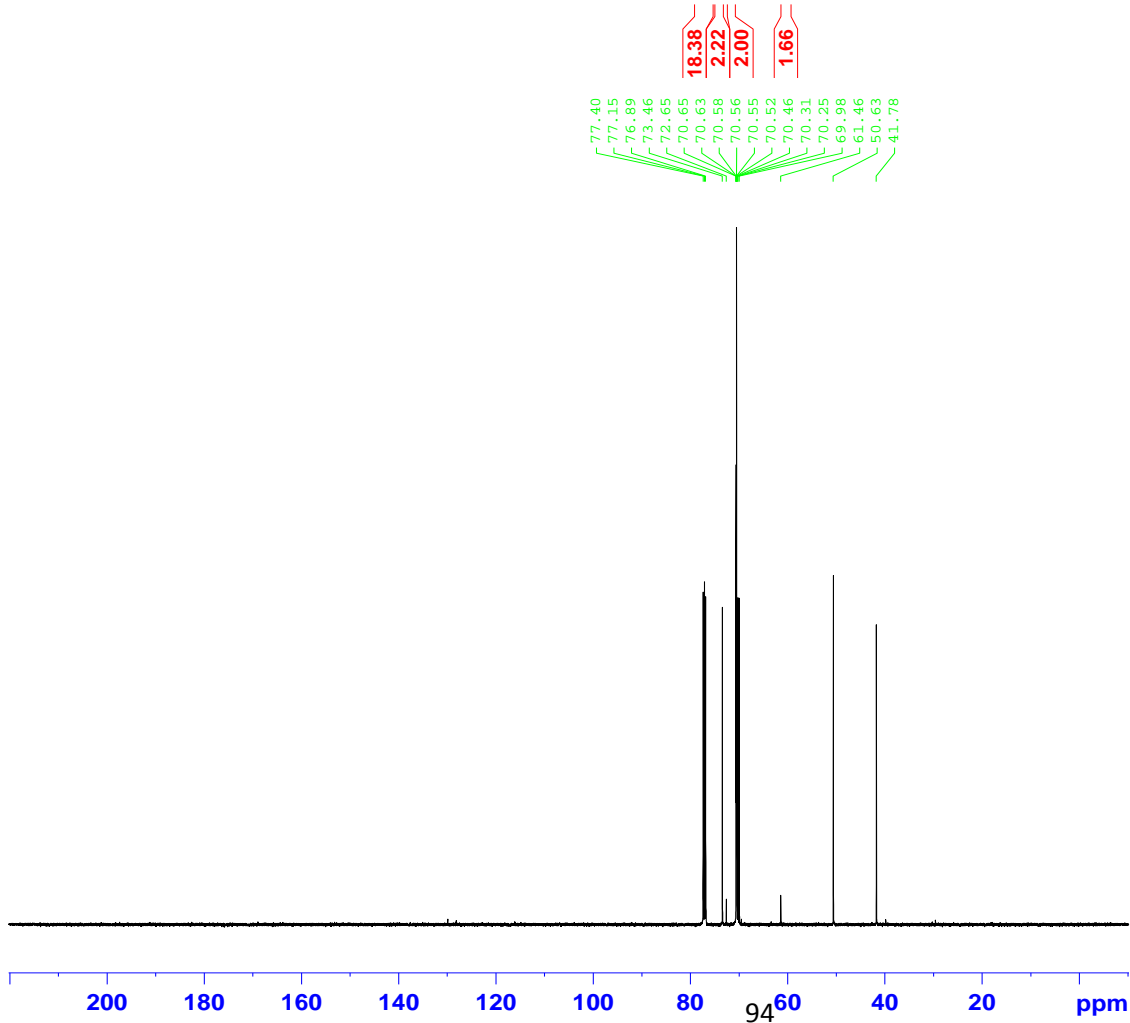

```

NAME      ZH3-147_N3-P6-NH2
EXPNO    2
PROCNO   1
Date_    20111208
Time     1.14
INSTRUM  spect
PROBHD   5 mm PABBO BB-
PULPROG  zgpg30
TD       65536
SOLVENT  CDCl3
NS       1024
DS       4
SWH      28985.508 Hz
FIDRES   0.442284 Hz
AQ       1.1305633 sec
RG       4096
DW       17.250 usec
DE       6.50 usec
TE       296.8 K
D1       2.00000000 sec
D11     0.03000000 sec
TD0      1
    
```

```

===== CHANNEL f1 =====
NUC1     13C
P1       8.83 usec
PL1      0.00 dB
PL1W    80.88274384 W
SF01    125.7709936 MHz
    
```

```

===== CHANNEL f2 =====
CPDPRG2  waltz16
NUC2     1H
PCPD2    80.00 usec
PL2      1.20 dB
PL12     15.40 dB
PL13     15.40 dB
PL2W    17.72078514 W
PL12W   0.67372549 W
PL13W   0.67372549 W
SFO2    500.1320005 MHz
SI       32768
SF       125.7577890 MHz
WDW      EM
SSB      0
LB       1.00 Hz
GB       0
PC       1.40
    
```

Mariner Spec /1:33 (T/0.00:0.57) ASC[BP = 307.2, 4777]

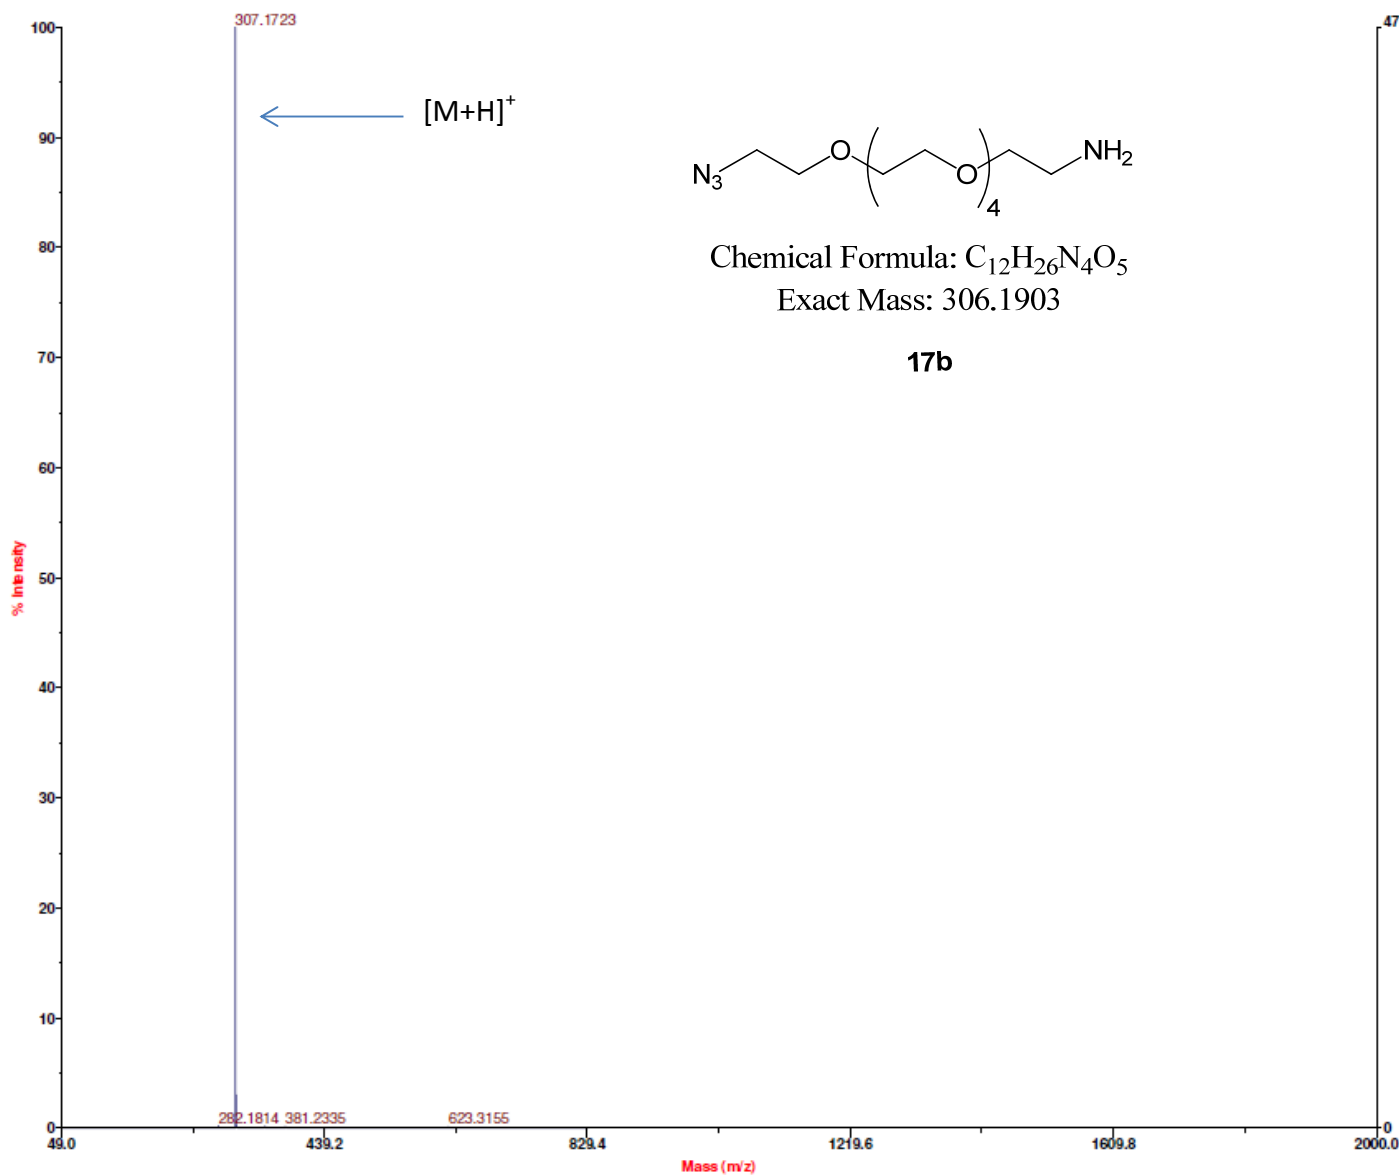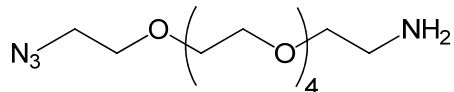

Chemical Formula: C<sub>12</sub>H<sub>26</sub>N<sub>4</sub>O<sub>5</sub>

Exact Mass: 306.1903

17b

|                                       |                |
|---------------------------------------|----------------|
| --> Mariner System State <--          |                |
| Instrument State                      | ON             |
| Ion Polarity                          | POS            |
| Auxiliary Gas                         | ON             |
| Curtain Gas                           | ON             |
| Nebulizer Gas                         | ON             |
| Calibration Constant A                | 5.0146867E-007 |
| Calibration Constant B                | 77.798312      |
| TDC Deadtime                          | 10             |
| --> Source Settings <--               |                |
| Spray Tip Potential                   | 4509.96        |
| SCIE X Heater                         | 300.05         |
| --> API Interface Settings <--        |                |
| Nozzle Potential                      | 40.04          |
| Skimmer 1 Potential                   | 10.01          |
| Quadrupole DC Potential               | 5.49           |
| Deflection Voltage                    | 0.10           |
| Einzel Lens Potential                 | -24.00         |
| Quadrupole RF Voltage                 | 999.76         |
| Quadrupole Temperature                | 140.01         |
| Nozzle Temperature                    | 140.01         |
| --> Analyzer Settings <--             |                |
| Push Pulse Potential                  | 490.00         |
| Pull Pulse Potential                  | 213.11         |
| Pull Bias Potential                   | 10.00          |
| Acceleration Potential                | 3999.94        |
| Reflector Potential                   | 1549.99        |
| Detector Voltage                      | 1700.24        |
| --> Spectrum Acquisition Settings <-- |                |
| Seconds Per Spectrum                  | 1.00           |
| Ion Count Threshold                   | 0.00           |
| First Mass                            | 50.00          |
| Last Mass                             | 2000.00        |
| Accumulate Spectra                    | OFF            |
| Standby at End of Acquisition         | OFF            |
| --> Centroid Spectra Settings <--     |                |
| Centroid Spectra                      | OFF            |
| --> System Settings <--               |                |
| Gas Control Mode                      | Manual         |
| Syringe Pump Mode                     | Manual         |
| Syringe Pump Rate                     | 50.00          |
| Syringe Diameter                      | 3.26           |
| Min Analyzer Mass                     | 50.00          |
| Max Analyzer Mass                     | 4000.00        |

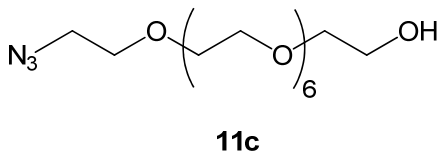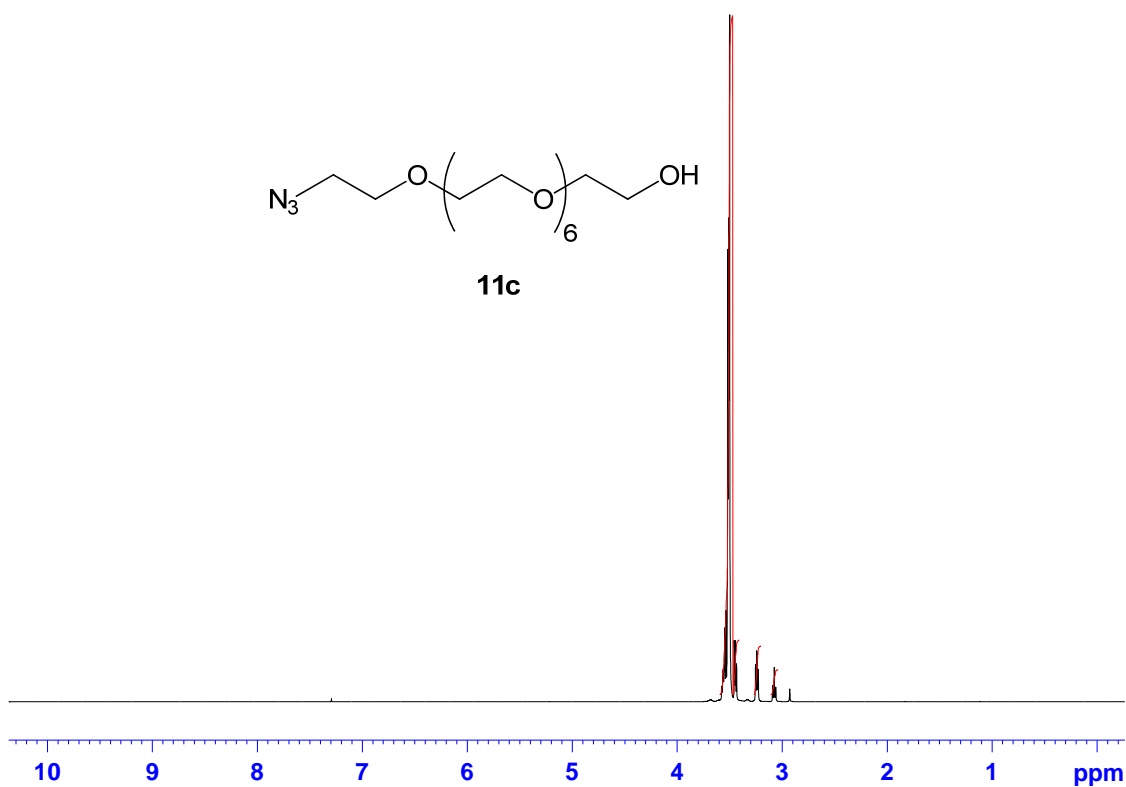

```

NAME      LG-674_OEG-Mono-N3
EXPNO     1
PROCNO    1
Date_     20110413
Time      19.32
INSTRUM   spect
PROBHD    5 mm PABBO BB-
PULPROG   zg30
TD         65536
SOLVENT   CDCl3
NS         16
DS         2
SWH       8802.817 Hz
FIDRES    0.134320 Hz
AQ        3.7224948 sec
RG         11.3
DW        56.800 usec
DE        6.50 usec
TE        298.0 K
D1        1.00000000 sec
TD0       1
    
```

```

===== CHANNEL f1 =====
NUC1      1H
P1        14.85 usec
PL1       -0.60 dB
PL1W      13.81451130 W
SFO1      400.1320007 MHz
SI        32768
SF        400.1300000 MHz
WDW       EM
SSB       0
LB        0.30 Hz
GB        0
PC        1.00
    
```

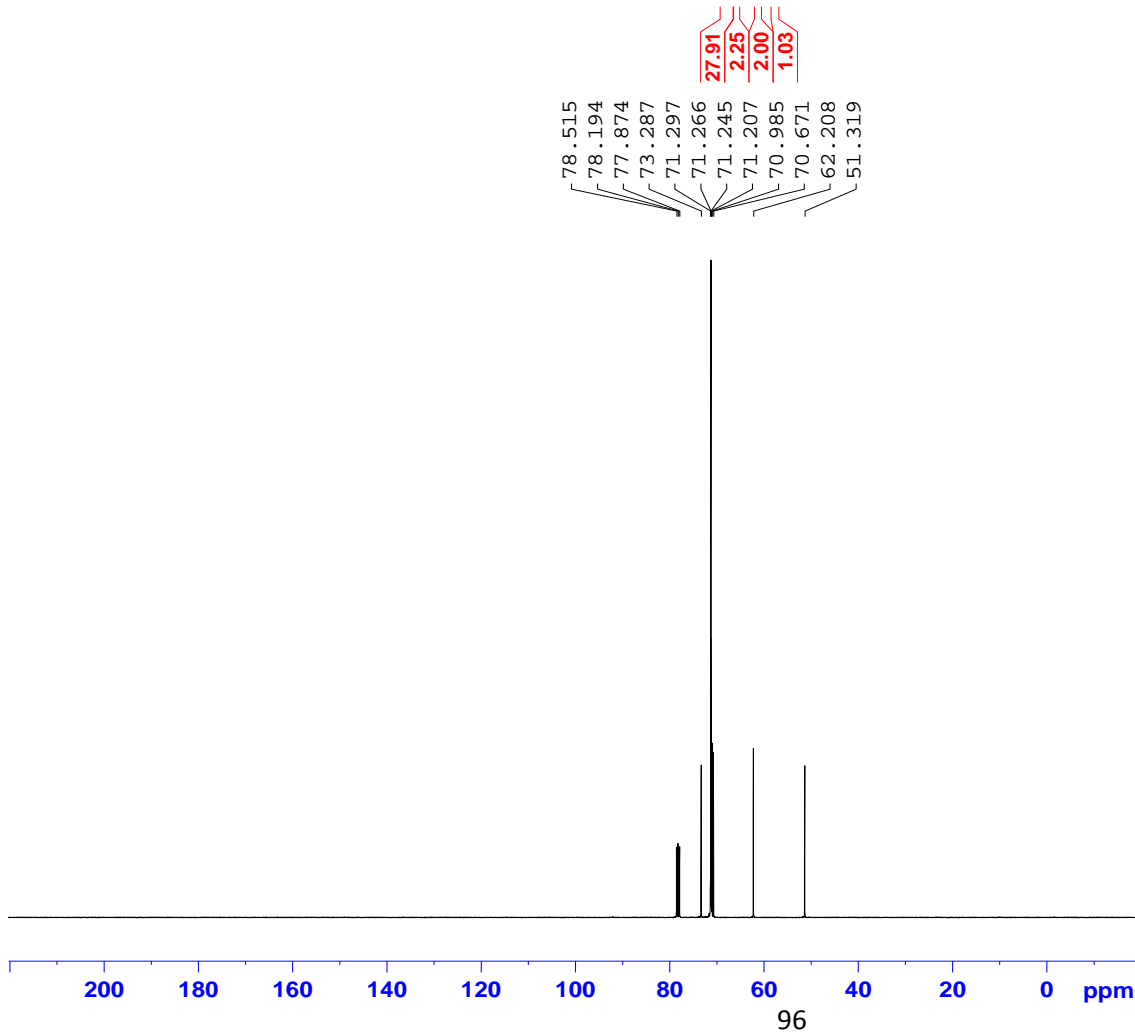

```

NAME      LG-674_OEG-Mono-N3
EXPNO     2
PROCNO    1
Date_     20110413
Time      20.32
INSTRUM   spect
PROBHD    5 mm PABBO BB-
PULPROG   zgpg30
TD         65536
SOLVENT   CDCl3
NS         1024
DS         4
SWH       24038.461 Hz
FIDRES    0.366798 Hz
AQ        1.3631988 sec
RG         1150
DW        20.800 usec
DE        6.50 usec
TE        298.0 K
D1        2.00000000 sec
D11       0.03000000 sec
TD0       1
    
```

```

===== CHANNEL f1 =====
NUC1      13C
P1        9.99 usec
PL1       -3.00 dB
PL1W      73.67452240 W
SFO1      100.6228298 MHz
    
```

```

===== CHANNEL f2 =====
CPDPRG2   waltz16
NUC2      1H
PCPD2     80.00 usec
PL2       -0.65 dB
PL12      13.40 dB
PL13      13.40 dB
PL2W      13.97447491 W
PL12W     0.54996562 W
PL13W     0.54996562 W
SFO2      400.1316005 MHz
SI        32768
SF        100.6126885 MHz
WDW       EM
SSB       0
LB        1.00 Hz
GB        0
PC        1.40
    
```

Mariner Spec /1:29 (T /0.00:0.50) ASC[BP = 418.3, 533]

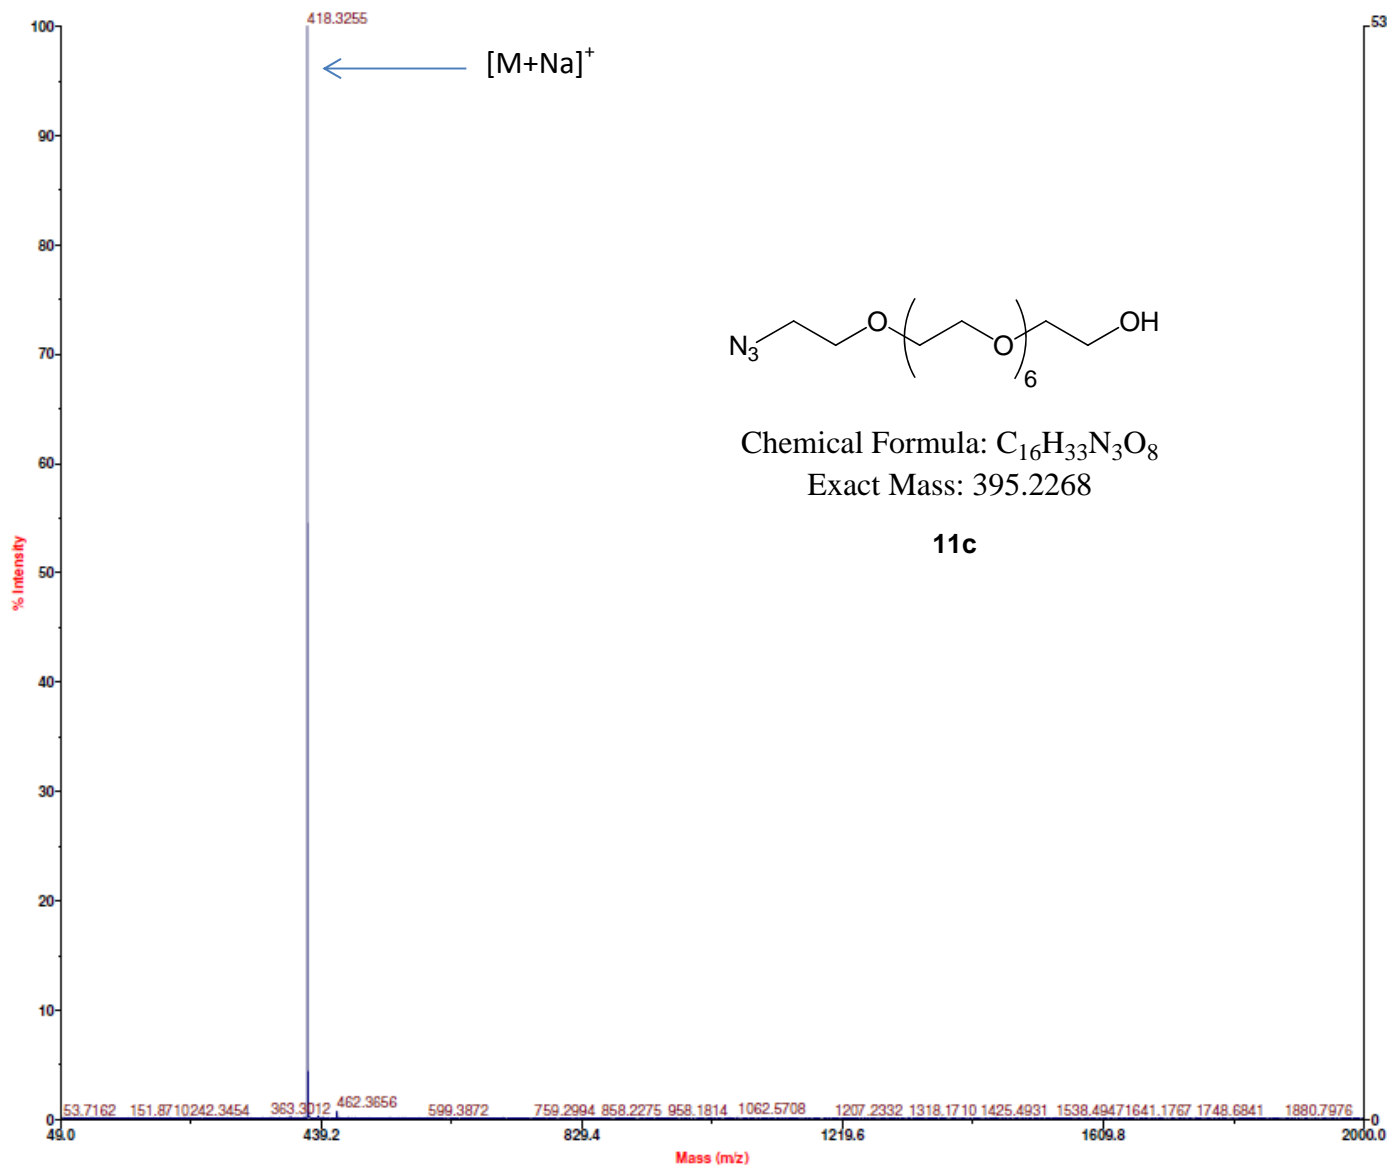

|                                       |                |
|---------------------------------------|----------------|
| --> Mariner System State <--          |                |
| Instrument State                      | ON             |
| Ion Polarity                          | POS            |
| Auxiliary Gas                         | ON             |
| Curtain Gas                           | ON             |
| Nebulizer Gas                         | ON             |
| Calibration Constant A                | 5.0174991E-007 |
| Calibration Constant B                | 78.221559      |
| TDC Deadtime                          | 10             |
| --> Source Settings <--               |                |
| Spray Tip Potential                   | 4509.96        |
| SCIEX Heater                          | 300.05         |
| --> API Interface Settings <--        |                |
| Nozzle Potential                      | 149.90         |
| Skimmer 1 Potential                   | 10.01          |
| Quadrupole DC Potential               | 5.49           |
| Deflection Voltage                    | 0.10           |
| Einzel Lens Potential                 | -24.00         |
| Quadrupole RF Voltage                 | 999.76         |
| Quadrupole Temperature                | 140.01         |
| Nozzle Temperature                    | 140.01         |
| --> Analyzer Settings <--             |                |
| Push Pulse Potential                  | 490.00         |
| Pull Pulse Potential                  | 213.11         |
| Pull Bias Potential                   | 10.00          |
| Acceleration Potential                | 3999.94        |
| Reflector Potential                   | 1549.99        |
| Detector Voltage                      | 1700.24        |
| --> Spectrum Acquisition Settings <-- |                |
| Seconds Per Spectrum                  | 1.00           |
| Ion Count Threshold                   | 0.00           |
| First Mass                            | 50.00          |
| Last Mass                             | 2000.00        |
| Accumulate Spectra                    | OFF            |
| Standby at End of Acquisition         | OFF            |
| --> Centroid Spectra Settings <--     |                |
| Centroid Spectra                      | OFF            |
| --> System Settings <--               |                |
| Gas Control Mode                      | Manual         |
| Syringe Pump Mode                     | Manual         |
| Syringe Pump Rate                     | 50.00          |
| Syringe Diameter                      | 3.26           |
| Min Analyzer Mass                     | 50.00          |
| Max Analyzer Mass                     | 4000.00        |

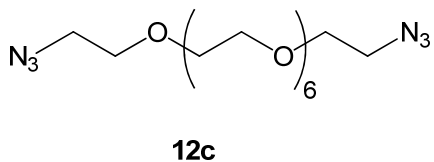

3.667  
3.655  
3.641  
3.638  
3.628  
3.626  
3.375  
3.363  
3.350

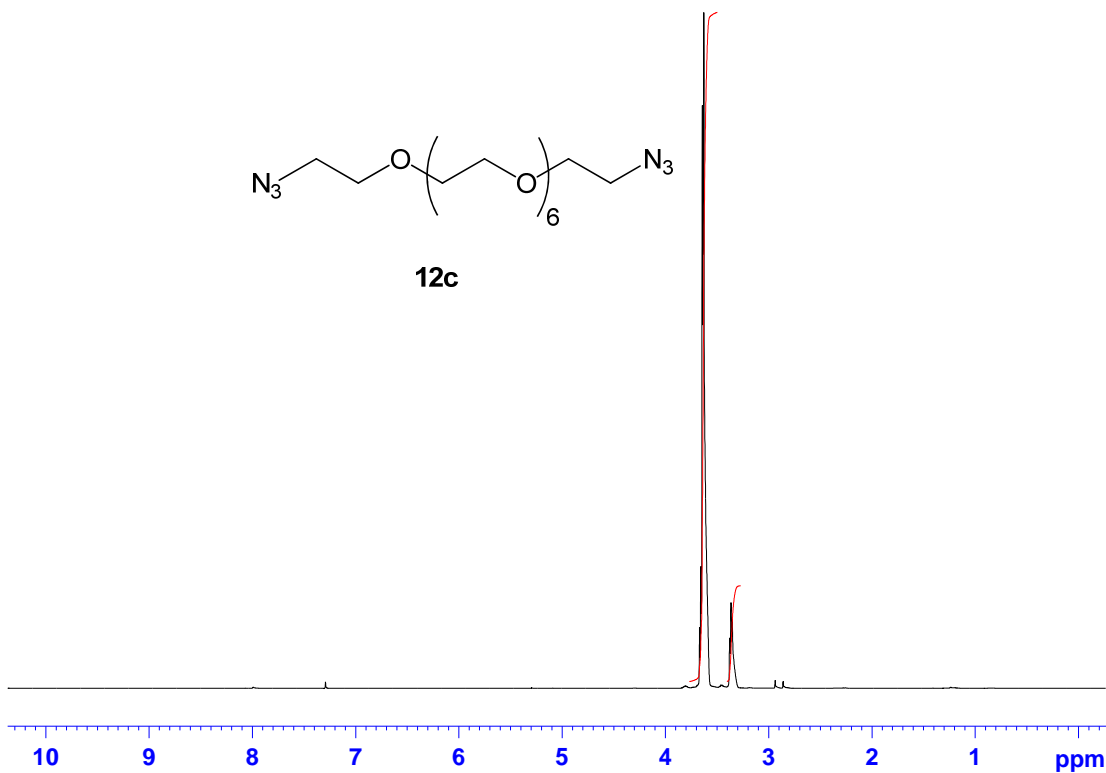

```

NAME      LG-674_OEG-Di-N3
EXPNO     1
PROCNO    1
Date_     20110413
Time      17.55
INSTRUM   spect
PROBHD    5 mm PABBO BB-
PULPROG   zg30
TD         65536
SOLVENT   CDCl3
NS         16
DS         2
SWH        8802.817 Hz
FIDRES     0.134320 Hz
AQ         3.7224948 sec
RG         22.6
DW         56.800 usec
DE         6.50 usec
TE         298.0 K
D1         1.00000000 sec
TD0        1
    
```

```

===== CHANNEL f1 =====
NUC1      1H
P1         14.85 usec
PL1        -0.60 dB
PL1W      13.81451130 W
SFO1      400.1320007 MHz
SI         32768
SF         400.1300000 MHz
WDW        EM
SSB        0
LB         0.30 Hz
GB         0
PC         1.00
    
```

78.260  
77.942  
77.623  
71.464  
71.445  
71.408  
71.358  
70.788  
51.459

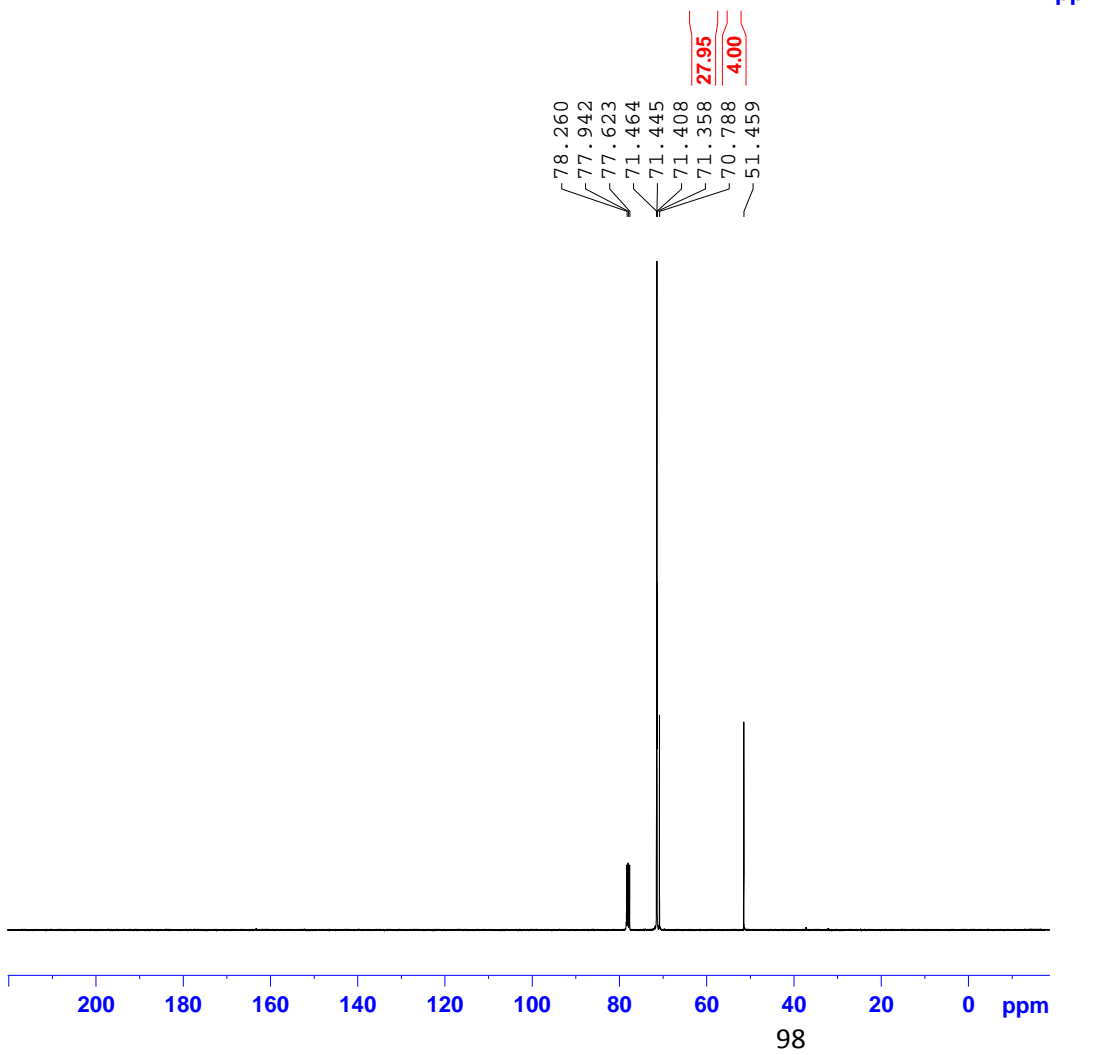

```

NAME      LG-674_OEG-Di-N3
EXPNO     2
PROCNO    1
Date_     20110413
Time      18.56
INSTRUM   spect
PROBHD    5 mm PABBO BB-
PULPROG   zgpg30
TD         65536
SOLVENT   CDCl3
NS         1024
DS         4
SWH        24038.461 Hz
FIDRES     0.366798 Hz
AQ         1.3631988 sec
RG         80.6
DW         20.800 usec
DE         6.50 usec
TE         298.0 K
D1         2.00000000 sec
D11        0.03000000 sec
TD0        1
    
```

```

===== CHANNEL f1 =====
NUC1      13C
P1         9.99 usec
PL1        -3.00 dB
PL1W      73.67452240 W
SFO1      100.6228298 MHz
    
```

```

===== CHANNEL f2 =====
CPDPRG2   waltz16
NUC2      1H
PCPD2     80.00 usec
PL2        -0.65 dB
PL12       13.40 dB
PL13       13.40 dB
PL2W      13.97447491 W
PL12W     0.54996562 W
PL13W     0.54996562 W
SFO2      400.1316005 MHz
SI         32768
SF         100.6126885 MHz
WDW        EM
SSB        0
LB         1.00 Hz
GB         0
PC         1.40
    
```

04/15/2011 pos15-Apr-201109:06:34040.0000000010.00000000

LNG-674A-POS 23 (0.431) Cm (1:28)

TOF MS ES+  
5.35e5

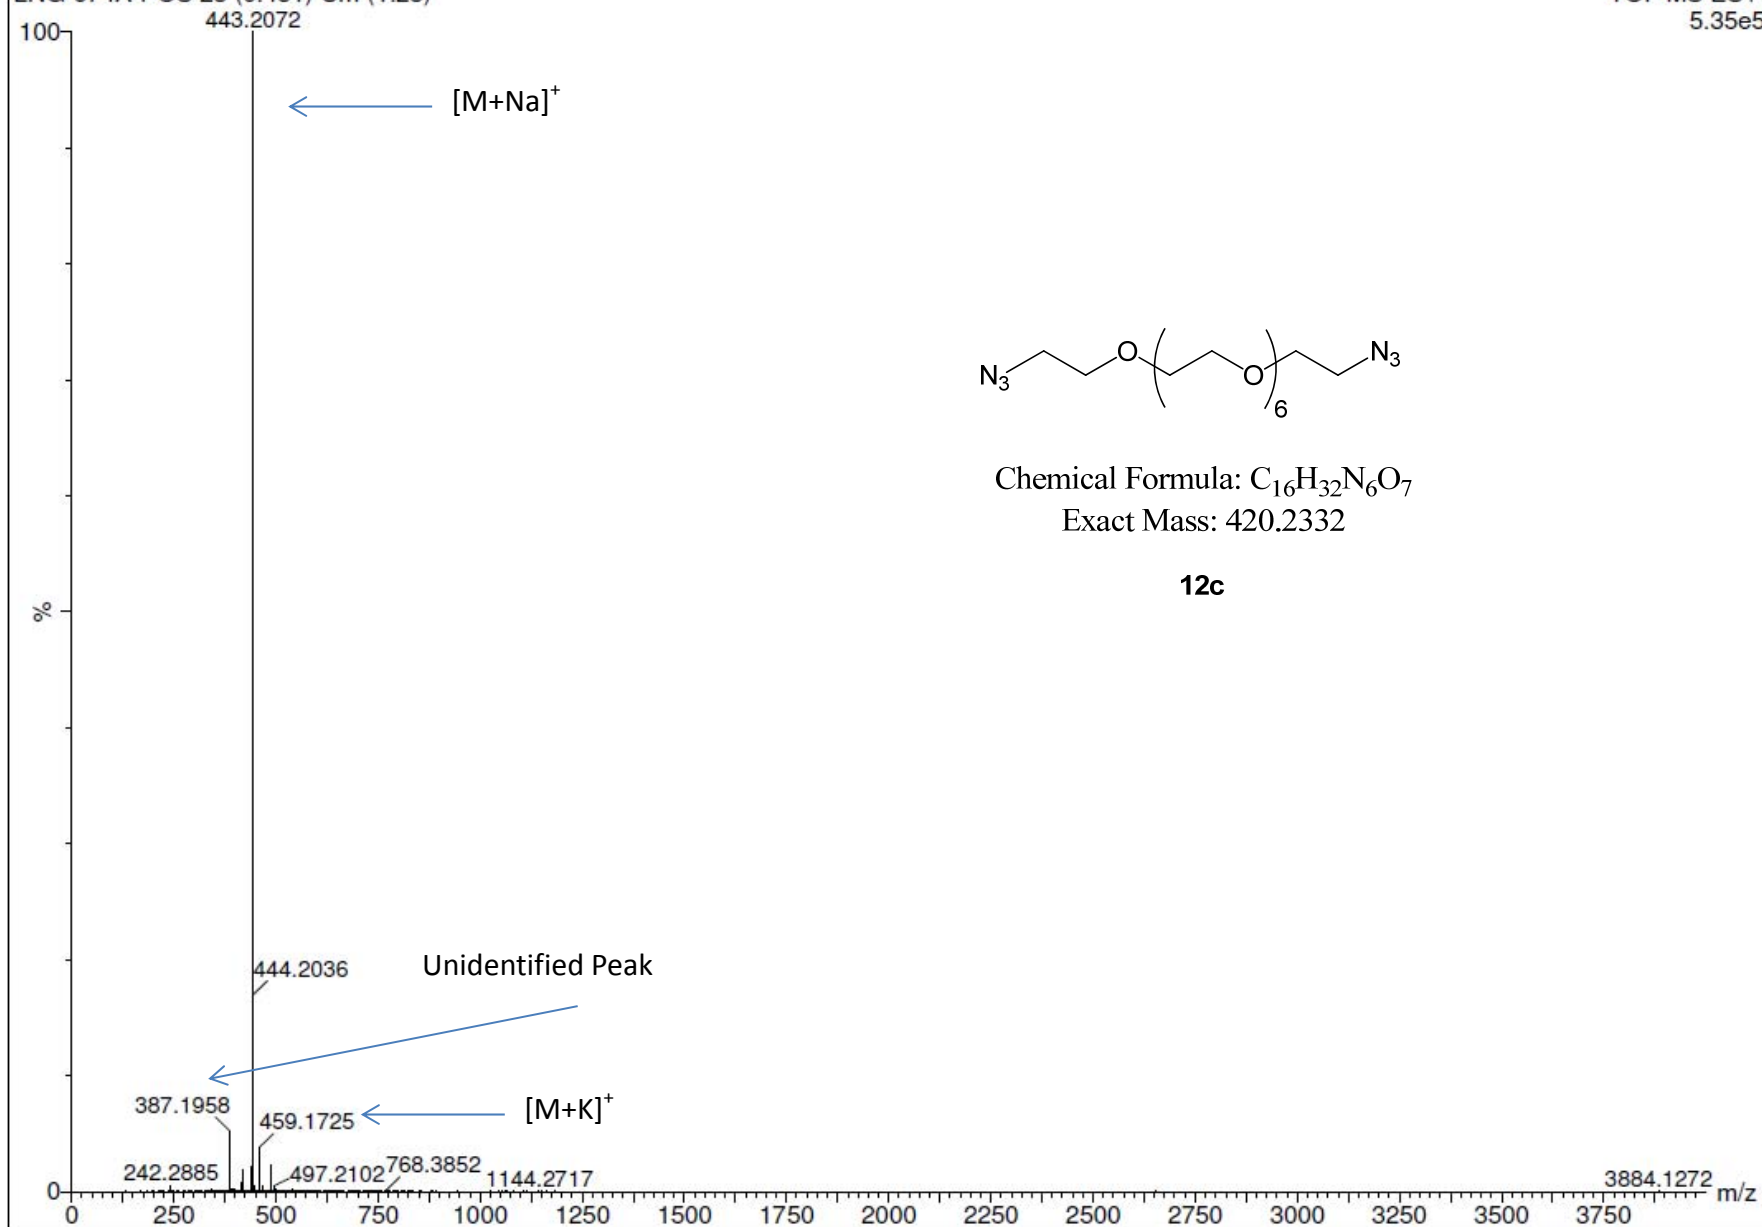

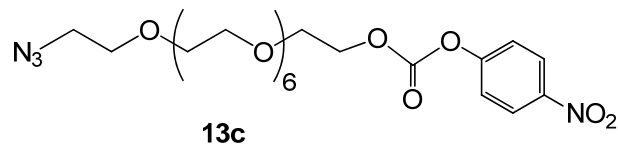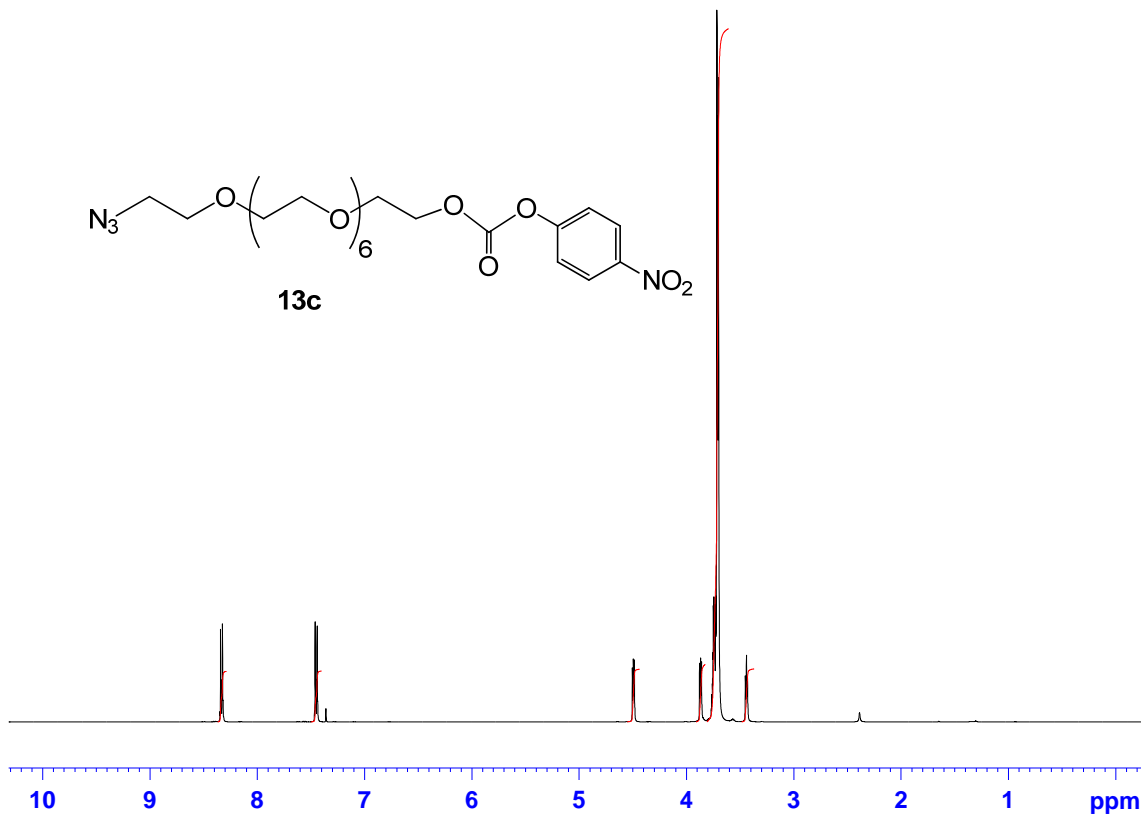

```

NAME      LG-832_N3-OEG-PNPC
EXPNO     1
PROCNO    1
Date_     20111122
Time      23.09
INSTRUM   spect
PROBHD    5 mm PABBO BB-
PULPROG   zg30
TD         65536
SOLVENT   CDCl3
NS         64
DS         2
SWH        10000.000 Hz
FIDRES    0.152588 Hz
AQ         3.2769001 sec
RG         28.5
DW         50.000 usec
DE         6.50 usec
TE         294.2 K
D1         1.00000000 sec
TD0        1
    
```

```

===== CHANNEL f1 =====
NUC1      1H
P1        14.75 usec
PL1       1.20 dB
PL1W      17.72078514 W
SFO1      500.1330008 MHz
SI         32768
SF         500.1299631 MHz
WDW        EM
SSB        0
LB         0.30 Hz
GB         0
PC         1.00
    
```

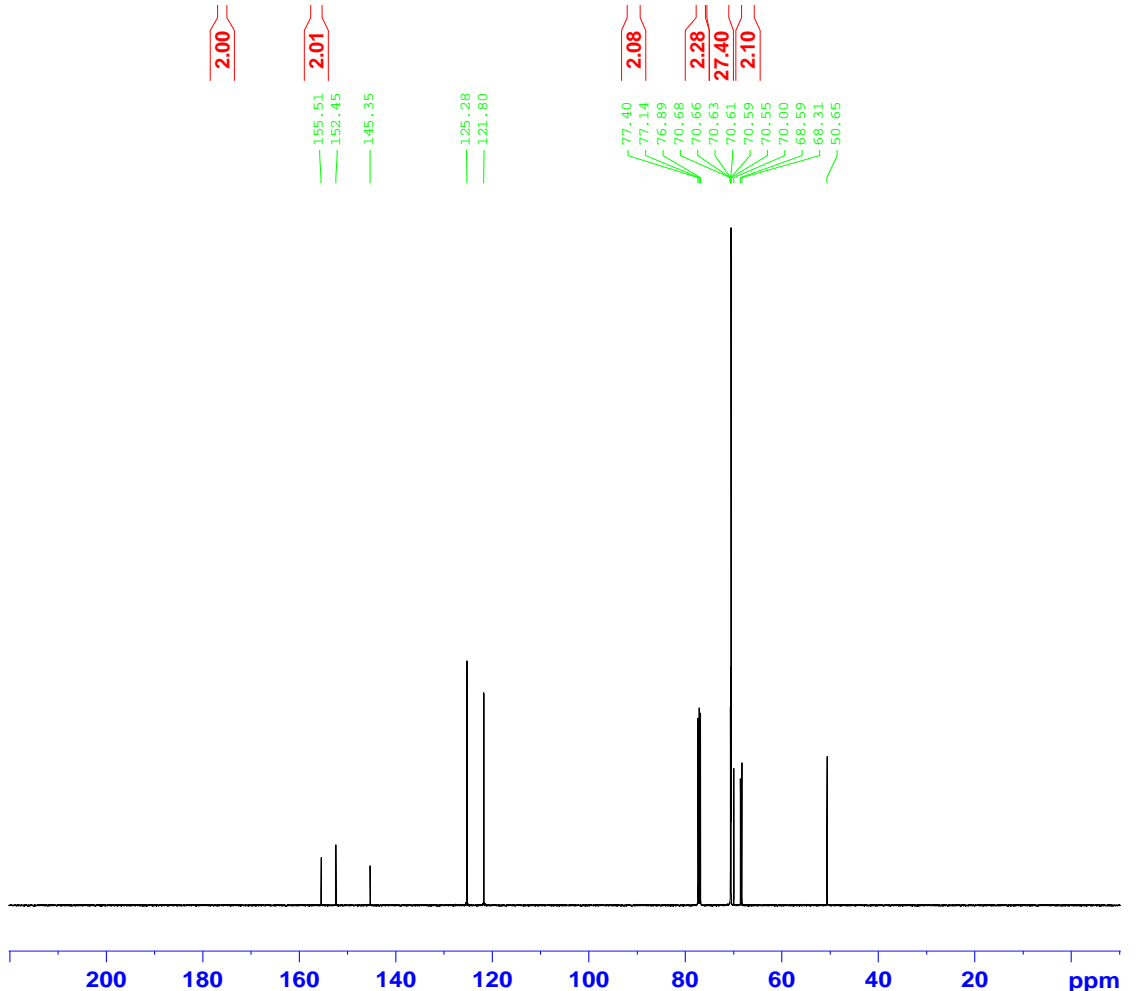

```

NAME      LG-832_N3-OEG-PNPC
EXPNO     2
PROCNO    1
Date_     20111123
Time      0.06
INSTRUM   spect
PROBHD    5 mm PABBO BB-
PULPROG   zgpg30
TD         65536
SOLVENT   CDCl3
NS         1024
DS         4
SWH        28985.508 Hz
FIDRES    0.442284 Hz
AQ         1.1305633 sec
RG         4096
DW         17.250 usec
DE         6.50 usec
TE         296.7 K
D1         2.00000000 sec
D11        0.03000000 sec
TD0        1
    
```

```

===== CHANNEL f1 =====
NUC1      13C
P1        8.83 usec
PL1       0.00 dB
PL1W      80.88274384 W
SFO1      125.7709936 MHz
    
```

```

===== CHANNEL f2 =====
CPDPRG2   waltz16
NUC2      1H
PCPD2     80.00 usec
PL2       1.20 dB
PL12      15.40 dB
PL13      15.40 dB
PL2W      17.72078514 W
PL12W     0.67372549 W
PL13W     0.67372549 W
SFO2      500.1320005 MHz
SI         32768
SF         125.7577890 MHz
WDW        EM
SSB        0
LB         1.00 Hz
GB         0
PC         1.40
    
```



Mariner Spec /1:23 (T/0.00:0.39) ASC[BP = 583.1, 247]

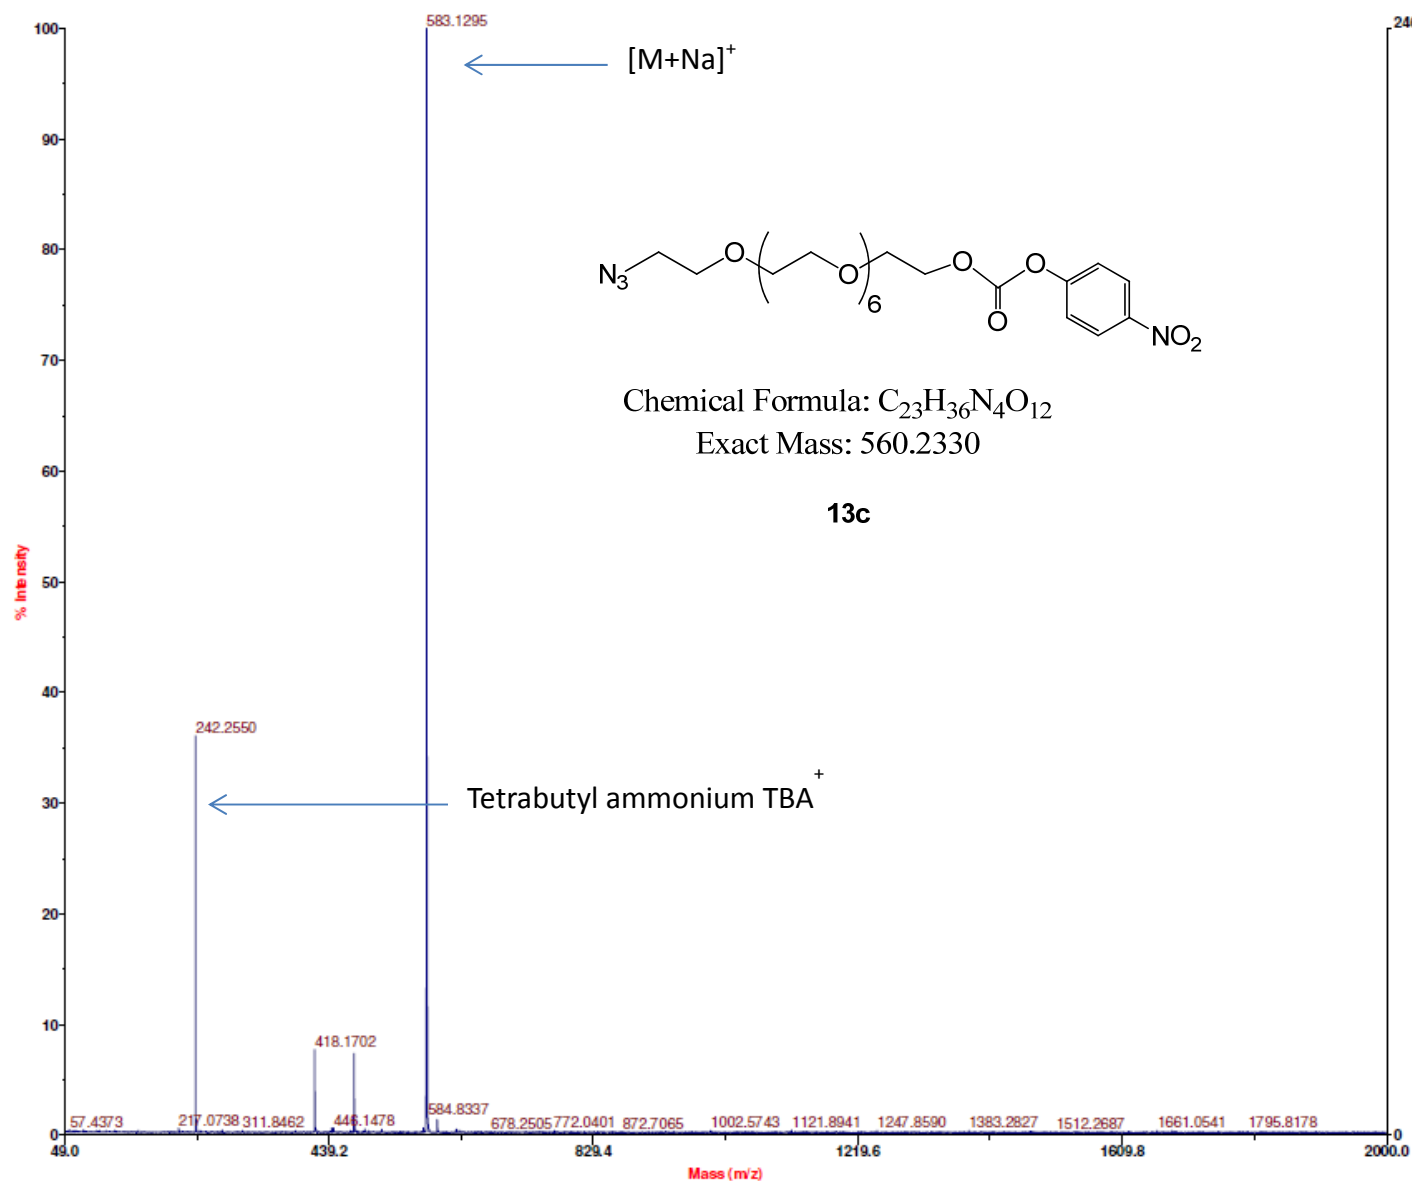

| --> Mariner System State <--          |                |
|---------------------------------------|----------------|
| Instrument State                      | ON             |
| Ion Polarity                          | POS            |
| Auxiliary Gas                         | ON             |
| Curtain Gas                           | ON             |
| Nebulizer Gas                         | ON             |
| Calibration Constant A                | 5.0146867E-007 |
| Calibration Constant B                | 77.798312      |
| TDC Deadtime                          | 10             |
| --> Source Settings <--               |                |
| Spray Tip Potential                   | 4509.96        |
| SCIEX Heater                          | 300.05         |
| --> API Interface Settings <--        |                |
| Nozzle Potential                      | 40.04          |
| Skimmer 1 Potential                   | 10.01          |
| Quadrupole DC Potential               | 5.49           |
| Deflection Voltage                    | 0.10           |
| Einzel Lens Potential                 | -24.00         |
| Quadrupole RF Voltage                 | 999.76         |
| Quadrupole Temperature                | 140.01         |
| Nozzle Temperature                    | 140.01         |
| --> Analyzer Settings <--             |                |
| Push Pulse Potential                  | 490.00         |
| Pull Pulse Potential                  | 213.11         |
| Pull Bias Potential                   | 10.00          |
| Acceleration Potential                | 3999.94        |
| Reflector Potential                   | 1549.99        |
| Detector Voltage                      | 1700.24        |
| --> Spectrum Acquisition Settings <-- |                |
| Seconds Per Spectrum                  | 1.00           |
| Ion Count Threshold                   | 0.00           |
| First Mass                            | 50.00          |
| Last Mass                             | 2000.00        |
| Accumulate Spectra                    | OFF            |
| Standby at End of Acquisition         | OFF            |
| --> Centroid Spectra Settings <--     |                |
| Centroid Spectra                      | OFF            |
| --> System Settings <--               |                |
| Gas Control Mode                      | Manual         |
| Syringe Pump Mode                     | Manual         |
| Syringe Pump Rate                     | 50.00          |
| Syringe Diameter                      | 3.26           |
| Min Analyzer Mass                     | 50.00          |
| Max Analyzer Mass                     | 4000.00        |

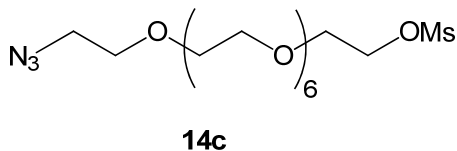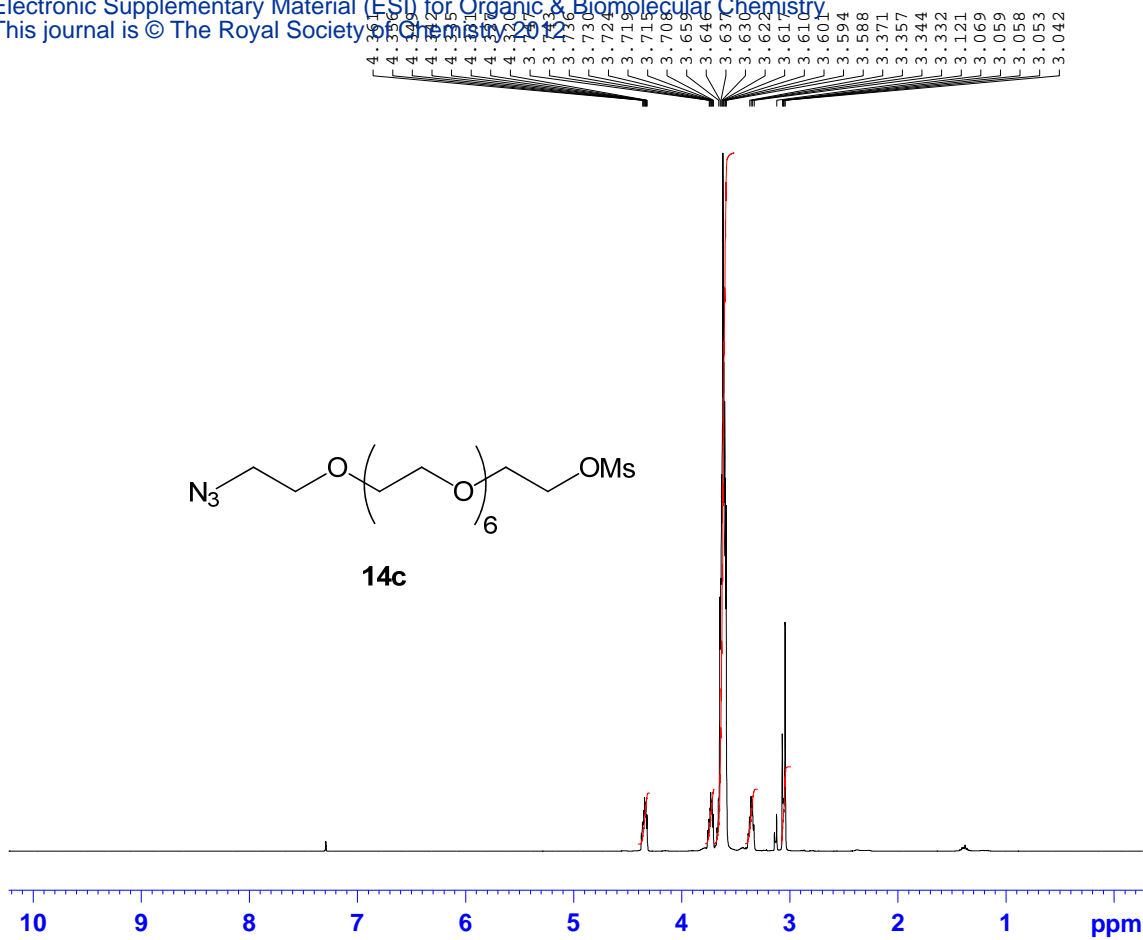

```

NAME      LG-678M_OMs-OEG-N3
EXPNO    1
PROCNO   1
Date_    20110419
Time     19.33
INSTRUM  spect
PROBHD   5 mm PABBO BB-
PULPROG  zg30
TD       65536
SOLVENT  CDCl3
NS       64
DS       2
SWH      8802.817 Hz
FIDRES   0.134320 Hz
AQ       3.7224948 sec
RG       25.4
DW       56.800 usec
DE       6.50 usec
TE       292.6 K
D1       1.00000000 sec
TD0      1
    
```

```

===== CHANNEL f1 =====
NUC1     1H
P1       14.85 usec
PL1      -0.60 dB
PL1W    13.81451130 W
SFO1    400.1320007 MHz
SI       32768
SF       400.1300000 MHz
WDW      EM
SSB      0
LB       0.30 Hz
GB       0
PC       1.00
    
```

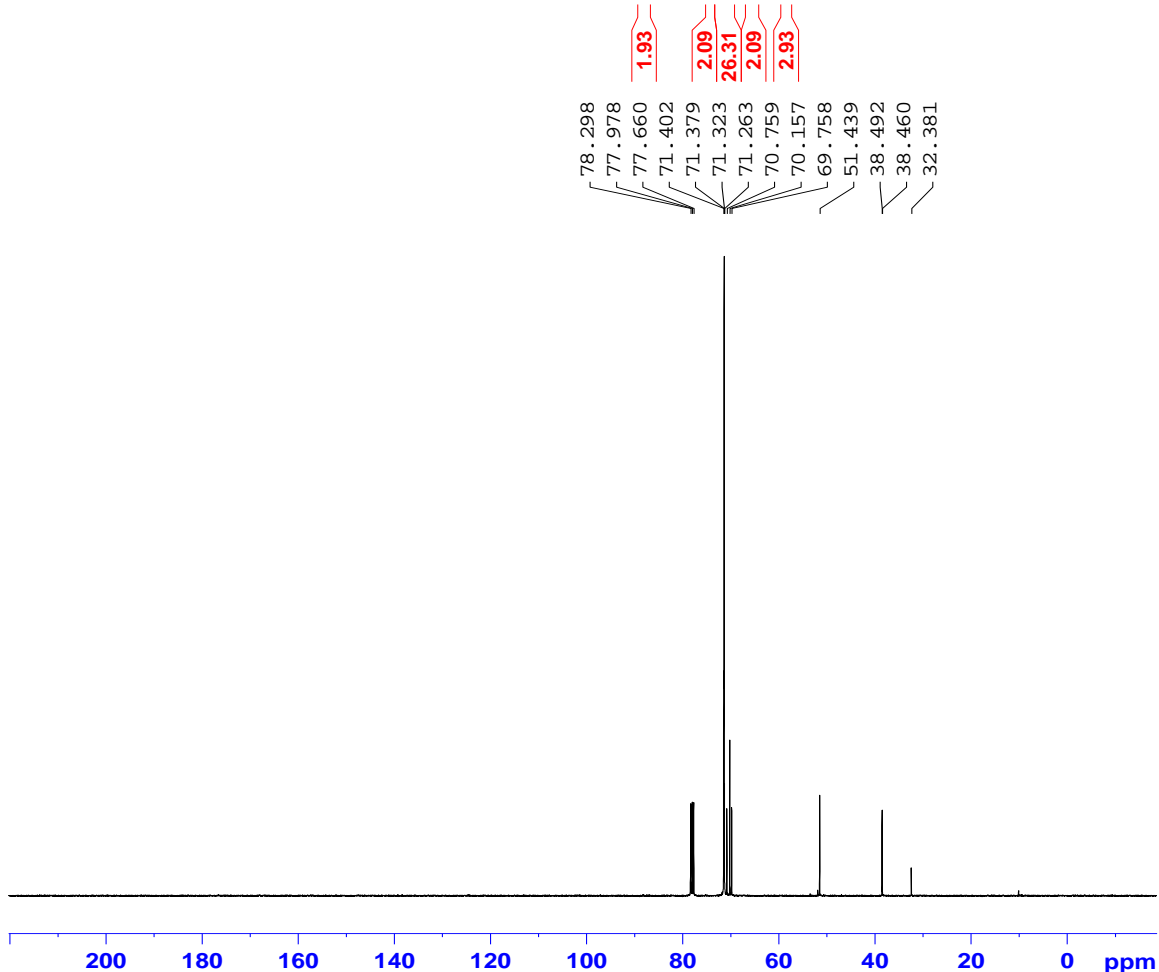

```

NAME      LG-678M_OMs-OEG-N3
EXPNO    2
PROCNO   1
Date_    20110419
Time     21.29
INSTRUM  spect
PROBHD   5 mm PABBO BB-
PULPROG  zgpg30
TD       65536
SOLVENT  CDCl3
NS       2000
DS       4
SWH      24038.461 Hz
FIDRES   0.366798 Hz
AQ       1.3631988 sec
RG       912
DW       20.800 usec
DE       6.50 usec
TE       294.7 K
D1       2.00000000 sec
D11      0.03000000 sec
TD0      1
    
```

```

===== CHANNEL f1 =====
NUC1     13C
P1       9.99 usec
PL1      -3.00 dB
PL1W    73.67452240 W
SFO1    100.6228298 MHz
    
```

```

===== CHANNEL f2 =====
CPDPRG2  waltz16
NUC2     1H
PCPD2    80.00 usec
PL2      -0.65 dB
PL12     13.40 dB
PL13     13.40 dB
PL2W    13.97447491 W
PL12W   0.54996562 W
PL13W   0.54996562 W
SFO2    400.1316005 MHz
SI       32768
SF       100.6126885 MHz
WDW      EM
SSB      0
LB       1.00 Hz
GB       0
PC       1.40
    
```

Mariner Spec / 1:32 ASC [BP = 496.1, 27]

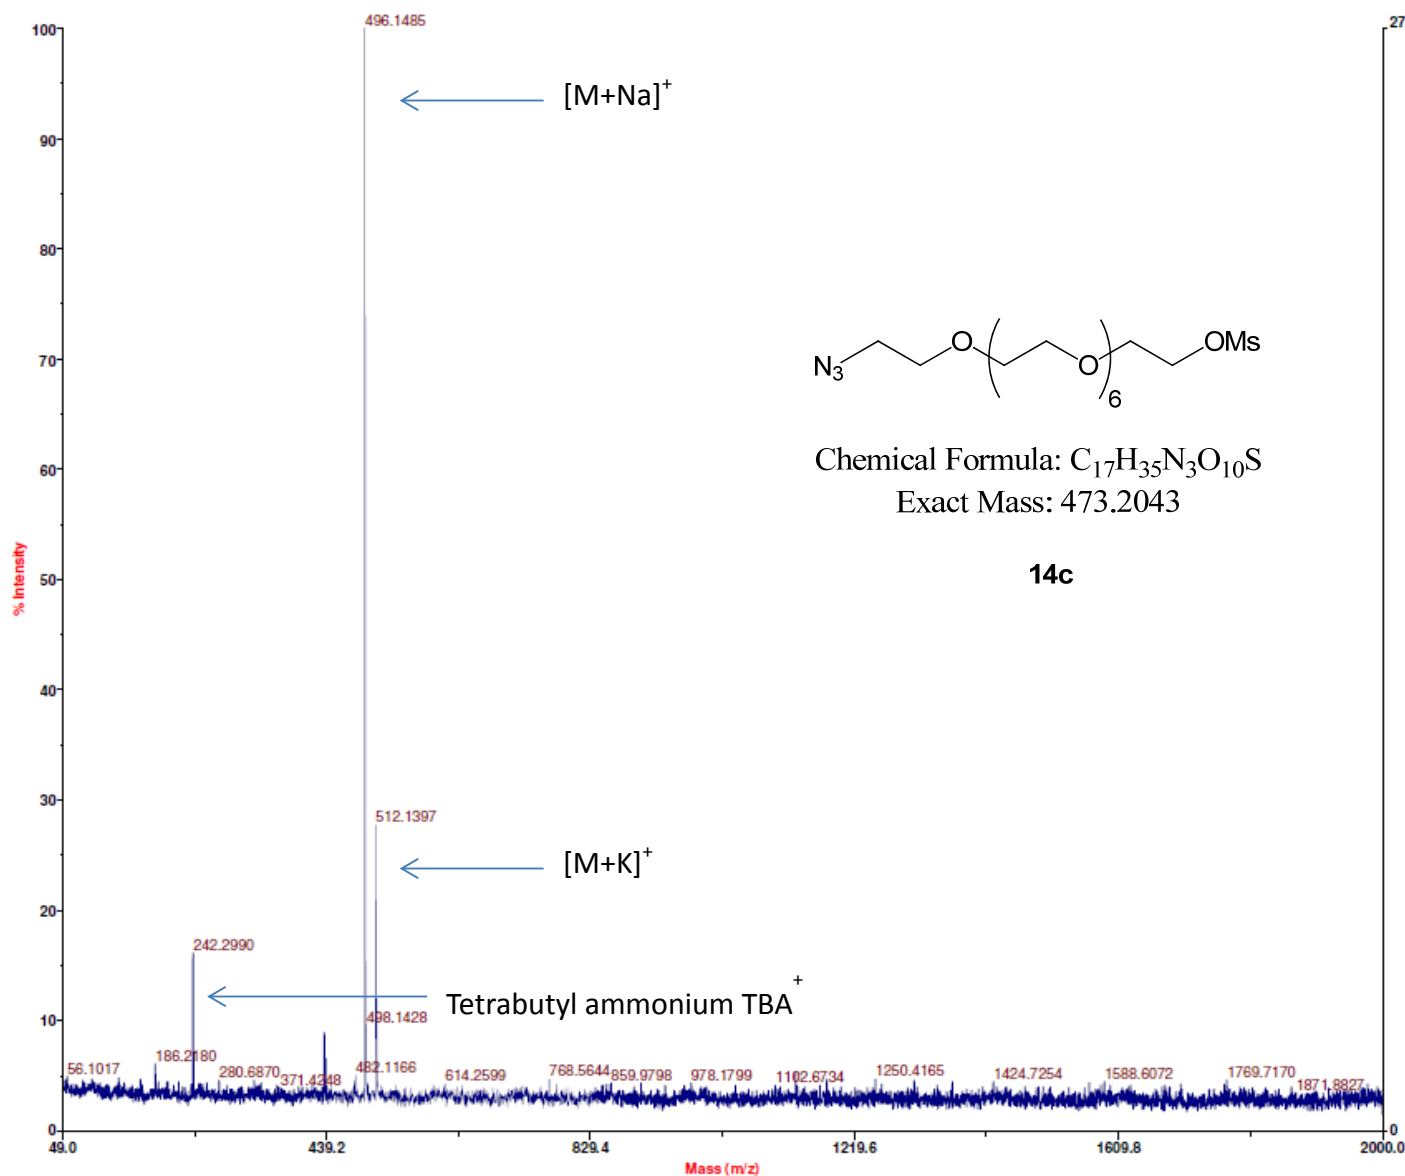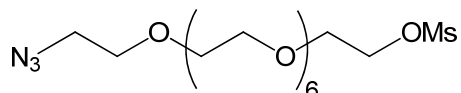

Chemical Formula: C<sub>17</sub>H<sub>35</sub>N<sub>3</sub>O<sub>10</sub>S  
Exact Mass: 473.2043

14c

|                                       |                |
|---------------------------------------|----------------|
| --> Mariner System State <--          |                |
| Instrument State                      | ON             |
| Ion Polarity                          | POS            |
| Auxiliary Gas                         | ON             |
| Curtain Gas                           | ON             |
| Nebulizer Gas                         | ON             |
| Calibration Constant A                | 5.0142059E-007 |
| Calibration Constant B                | 75.342573      |
| TDC Deadtime                          | 10             |
| --> Source Settings <--               |                |
| Spray Tip Potential                   | 4509.96        |
| SCIEX Heater                          | 300.05         |
| --> API Interface Settings <--        |                |
| Nozzle Potential                      | 149.90         |
| Skimmer 1 Potential                   | 10.01          |
| Quadrupole DC Potential               | 5.49           |
| Deflection Voltage                    | 0.10           |
| Einzel Lens Potential                 | -24.00         |
| Quadrupole RF Voltage                 | 999.76         |
| Quadrupole Temperature                | 140.01         |
| Nozzle Temperature                    | 140.01         |
| --> Analyzer Settings <--             |                |
| Push Pulse Potential                  | 490.00         |
| Pull Pulse Potential                  | 213.11         |
| Pull Bias Potential                   | 10.00          |
| Acceleration Potential                | 3999.94        |
| Reflector Potential                   | 1549.99        |
| Detector Voltage                      | 1700.24        |
| --> Spectrum Acquisition Settings <-- |                |
| Seconds Per Spectrum                  | 1.00           |
| Ion Count Threshold                   | 0.00           |
| First Mass                            | 50.00          |
| Last Mass                             | 2000.00        |
| Accumulate Spectra                    | OFF            |
| Standby at End of Acquisition         | OFF            |
| --> Centroid Spectra Settings <--     |                |
| Centroid Spectra                      | OFF            |
| --> System Settings <--               |                |
| Gas Control Mode                      | Manual         |
| Syringe Pump Mode                     | Manual         |
| Syringe Pump Rate                     | 50.00          |
| Syringe Diameter                      | 3.26           |
| Min Analyzer Mass                     | 50.00          |
| Max Analyzer Mass                     | 4000.00        |

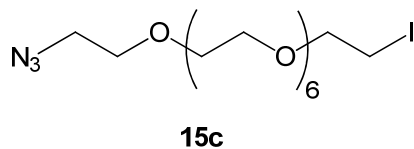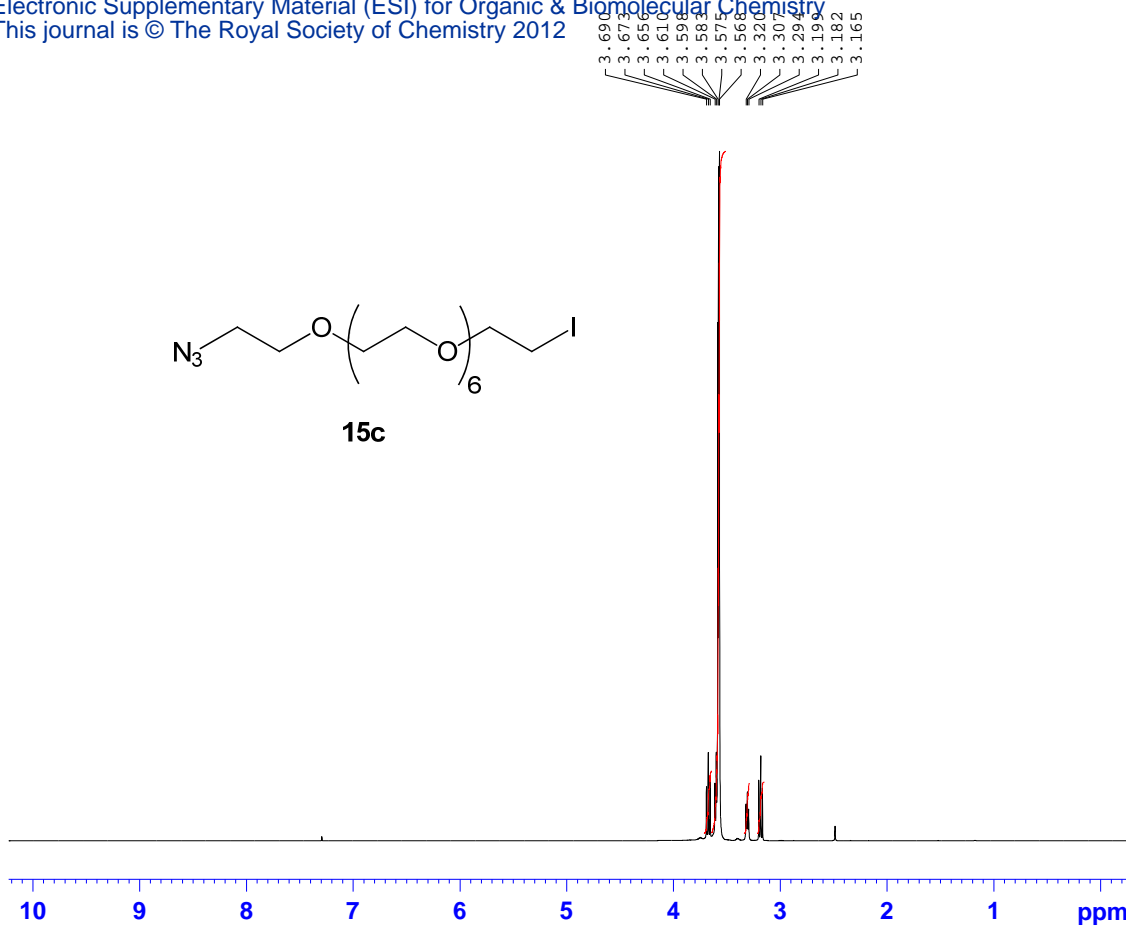

```

NAME      LG-679_Iodo-OEG-N3
EXPNO     1
PROCNO    1
Date_     20110420
Time      19.41
INSTRUM   spect
PROBHD    5 mm PABBO BB-
PULPROG   zg30
TD        65536
SOLVENT   CDCl3
NS        16
DS        2
SWH       8802.817 Hz
FIDRES    0.134320 Hz
AQ        3.7224948 sec
RG        16
DW        56.800 usec
DE        6.50 usec
TE        292.9 K
D1        1.00000000 sec
TD0       1
    
```

```

===== CHANNEL f1 =====
NUC1      1H
P1        14.85 usec
PL1       -0.60 dB
PL1W     13.81451130 W
SFO1     400.1320007 MHz
SI        32768
SF        400.1300000 MHz
WDW       EM
SSB       0
LB        0.30 Hz
GB        0
PC        1.00
    
```

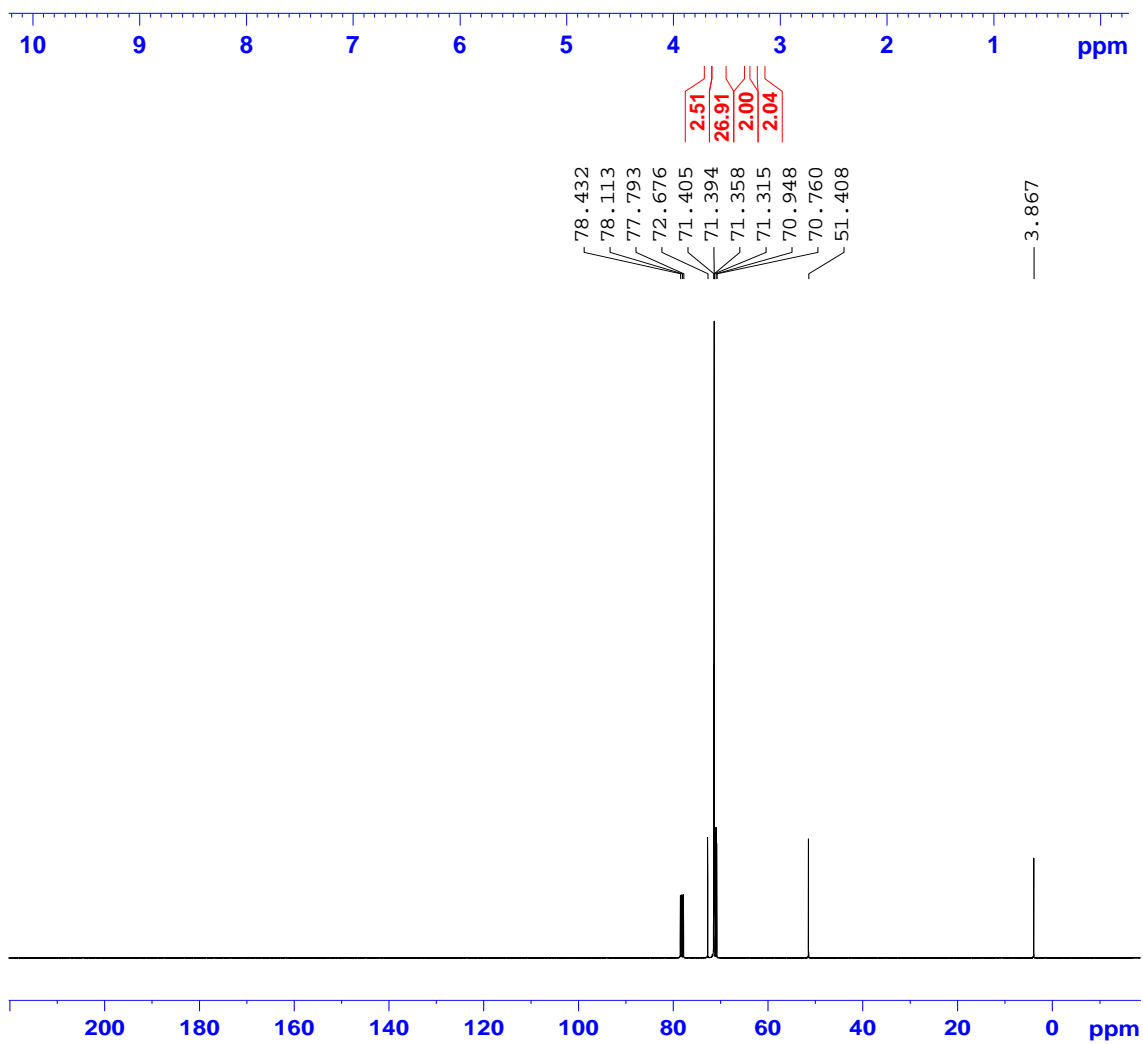

```

NAME      LG-679_Iodo-OEG-N3
EXPNO     2
PROCNO    1
Date_     20110420
Time      20.41
INSTRUM   spect
PROBHD    5 mm PABBO BB-
PULPROG   zgpg30
TD        65536
SOLVENT   CDCl3
NS        1024
DS        4
SWH       24038.461 Hz
FIDRES    0.366798 Hz
AQ        1.3631988 sec
RG        912
DW        20.800 usec
DE        6.50 usec
TE        294.8 K
D1        2.00000000 sec
D11       0.03000000 sec
TD0       1
    
```

```

===== CHANNEL f1 =====
NUC1      13C
P1        9.99 usec
PL1       -3.00 dB
PL1W     73.67452240 W
SFO1     100.6228298 MHz
    
```

```

===== CHANNEL f2 =====
CPDPRG2   waltz16
NUC2      1H
PCPD2     80.00 usec
PL2       -0.65 dB
PL12     13.40 dB
PL13     13.40 dB
PL2W     13.97447491 W
PL12W    0.54996562 W
PL13W    0.54996562 W
SFO2     400.1316005 MHz
SI        32768
SF        100.6126885 MHz
WDW       EM
SSB       0
LB        1.00 Hz
GB        0
PC        1.40
    
```

Mariner Spec /1:71 ASC[BP = 528.1, 90]

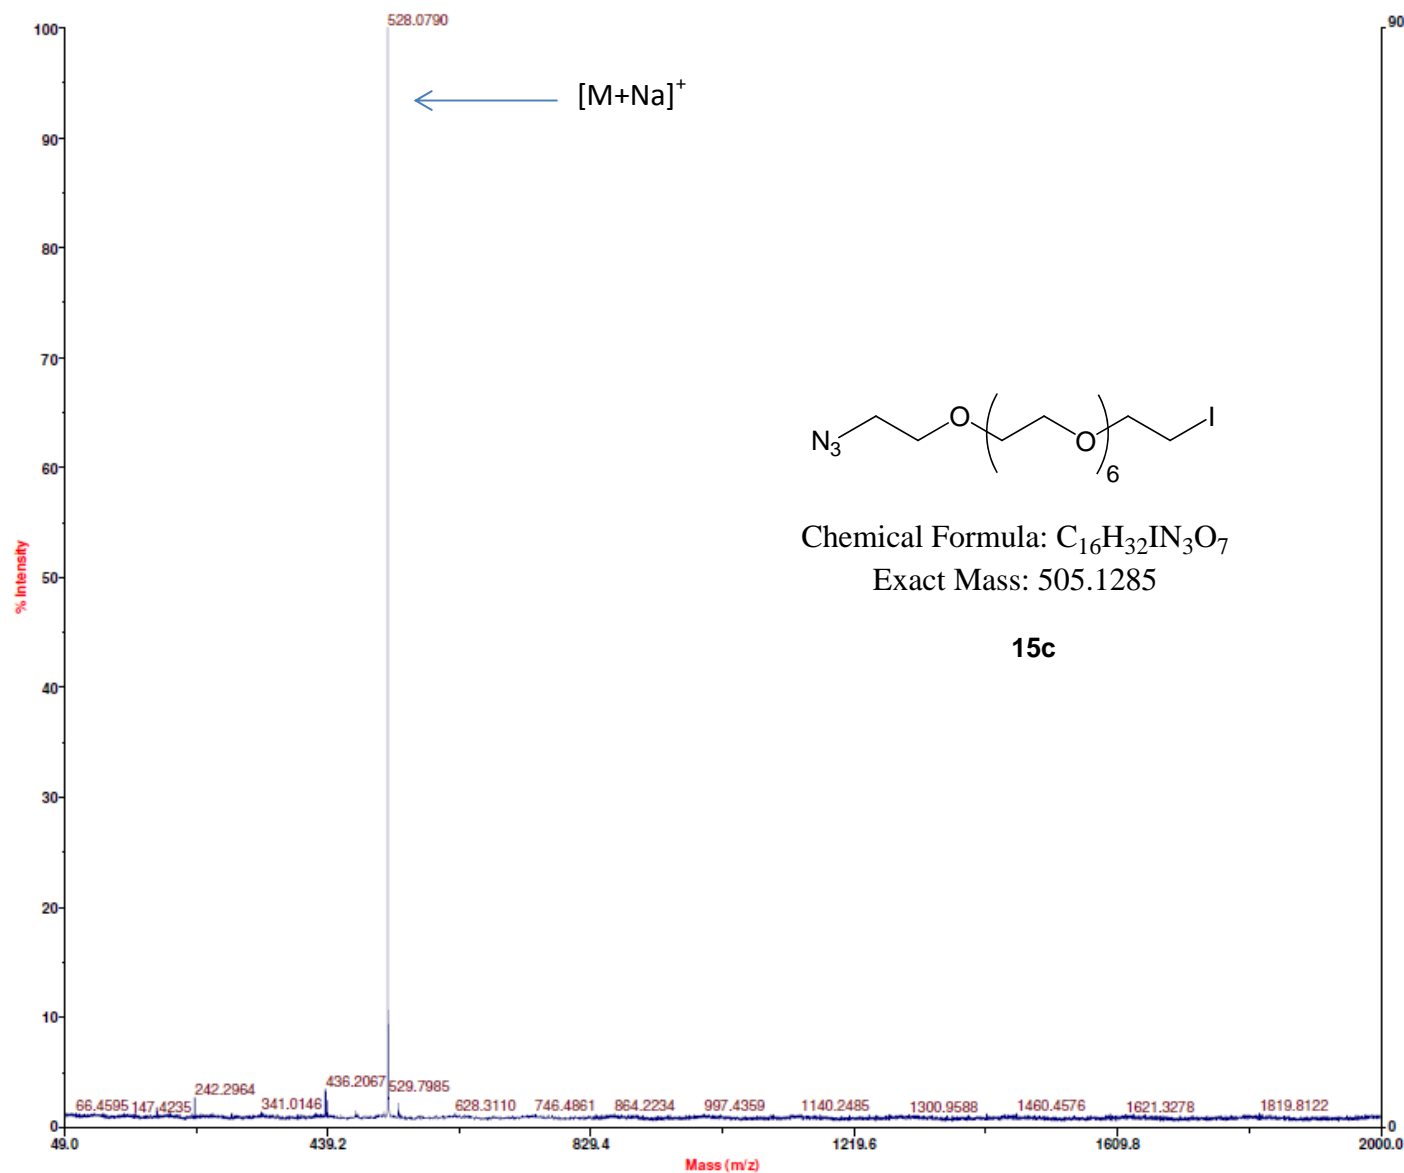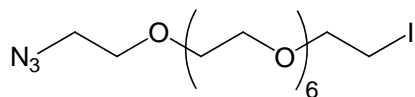

Chemical Formula: C<sub>16</sub>H<sub>32</sub>IN<sub>3</sub>O<sub>7</sub>

Exact Mass: 505.1285

15c

|                                       |                |
|---------------------------------------|----------------|
| --> Mariner System State <--          |                |
| Instrument State                      | ON             |
| Ion Polarity                          | POS            |
| Auxiliary Gas                         | ON             |
| Curtain Gas                           | ON             |
| Nebulizer Gas                         | ON             |
| Calibration Constant A                | 5.0142059E-007 |
| Calibration Constant B                | 75.342573      |
| TDC Deadtime                          | 10             |
| --> Source Settings <--               |                |
| Spray Tip Potential                   | 4509.96        |
| SCIEX Heater                          | 300.05         |
| --> API Interface Settings <--        |                |
| Nozzle Potential                      | 40.04          |
| Skimmer 1 Potential                   | 10.01          |
| Quadrupole DC Potential               | 5.49           |
| Deflection Voltage                    | 0.10           |
| Einzel Lens Potential                 | -24.00         |
| Quadrupole RF Voltage                 | 999.76         |
| Quadrupole Temperature                | 140.01         |
| Nozzle Temperature                    | 140.01         |
| --> Analyzer Settings <--             |                |
| Push Pulse Potential                  | 490.00         |
| Pull Pulse Potential                  | 213.11         |
| Pull Bias Potential                   | 10.00          |
| Acceleration Potential                | 3999.94        |
| Reflector Potential                   | 1549.99        |
| Detector Voltage                      | 1700.24        |
| --> Spectrum Acquisition Settings <-- |                |
| Seconds Per Spectrum                  | 1.00           |
| Ion Count Threshold                   | 0.00           |
| First Mass                            | 50.00          |
| Last Mass                             | 2000.00        |
| Accumulate Spectra                    | OFF            |
| Standby at End of Acquisition         | OFF            |
| --> Centroid Spectra Settings <--     |                |
| Centroid Spectra                      | OFF            |
| --> System Settings <--               |                |
| Gas Control Mode                      | Manual         |
| Syringe Pump Mode                     | Manual         |
| Syringe Pump Rate                     | 50.00          |
| Syringe Diameter                      | 3.26           |
| Min Analyzer Mass                     | 50.00          |
| Max Analyzer Mass                     | 4000.00        |

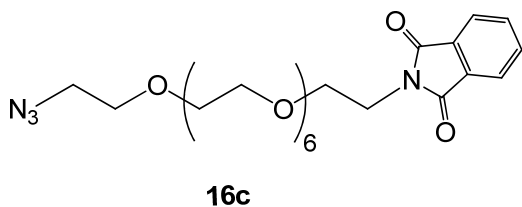

```

NAME      LG-833M_N3-OEG-NPth
EXPNO     4
PROCNO    1
Date_     20111123
Time      23.41
INSTRUM   spect
PROBHD    5 mm PABBO BB-
PULPROG   zg30
TD         65536
SOLVENT   CDCl3
NS         64
DS         2
SWH        10000.000 Hz
FIDRES    0.152588 Hz
AQ         3.2769001 sec
RG         18
DW         50.000 usec
DE         6.50 usec
TE         294.5 K
D1         1.00000000 sec
TD0        1
    
```

```

===== CHANNEL f1 =====
NUC1      1H
P1         14.75 usec
PL1        1.20 dB
PL1W       17.72078514 W
SFO1       500.1330008 MHz
SI         32768
SF         500.1299631 MHz
WDW        EM
SSB         0
LB         0.30 Hz
GB         0
PC         1.00
    
```

10 9 8 7 6 5 4 3 2 1 ppm

168.43  
168.15  
2.00  
2.04

134.36  
134.03  
133.90  
132.82  
132.06  
123.67  
123.28  
123.16

77.48  
77.22  
76.97  
76.61  
70.59  
70.56  
70.50  
70.47  
70.45  
70.02  
69.96  
67.82  
50.61  
37.19

```

NAME      LG-833M_N3-OEG-NPth
EXPNO     2
PROCNO    1
Date_     20111123
Time      22.42
INSTRUM   spect
PROBHD    5 mm PABBO BB-
PULPROG   zpgg30
TD         65536
SOLVENT   CDCl3
NS         1024
DS         4
SWH        28985.508 Hz
FIDRES    0.442284 Hz
AQ         1.1305633 sec
RG         4096
DW         17.250 usec
DE         6.50 usec
TE         296.9 K
D1         2.00000000 sec
D11        0.03000000 sec
TD0        1
    
```

```

===== CHANNEL f1 =====
NUC1      13C
P1         8.83 usec
PL1        0.00 dB
PL1W       80.88274384 W
SFO1       125.7709936 MHz
    
```

```

===== CHANNEL f2 =====
CPDPRG2   waltz16
NUC2      1H
PCPD2     80.00 usec
PL2        1.20 dB
PL12       15.40 dB
PL13       15.40 dB
PL2W       17.72078514 W
PL12W      0.67372549 W
PL13W      0.67372549 W
SFO2       500.1320005 MHz
SI         32768
SF         125.7577890 MHz
WDW        EM
SSB         0
LB         1.00 Hz
GB         0
PC         1.40
    
```

200 180 160 140 120 100 80 60 40 20 ppm

Mariner Spec /1:31 (T/0.00:0.53) ASC[BP = 547.1, 252]

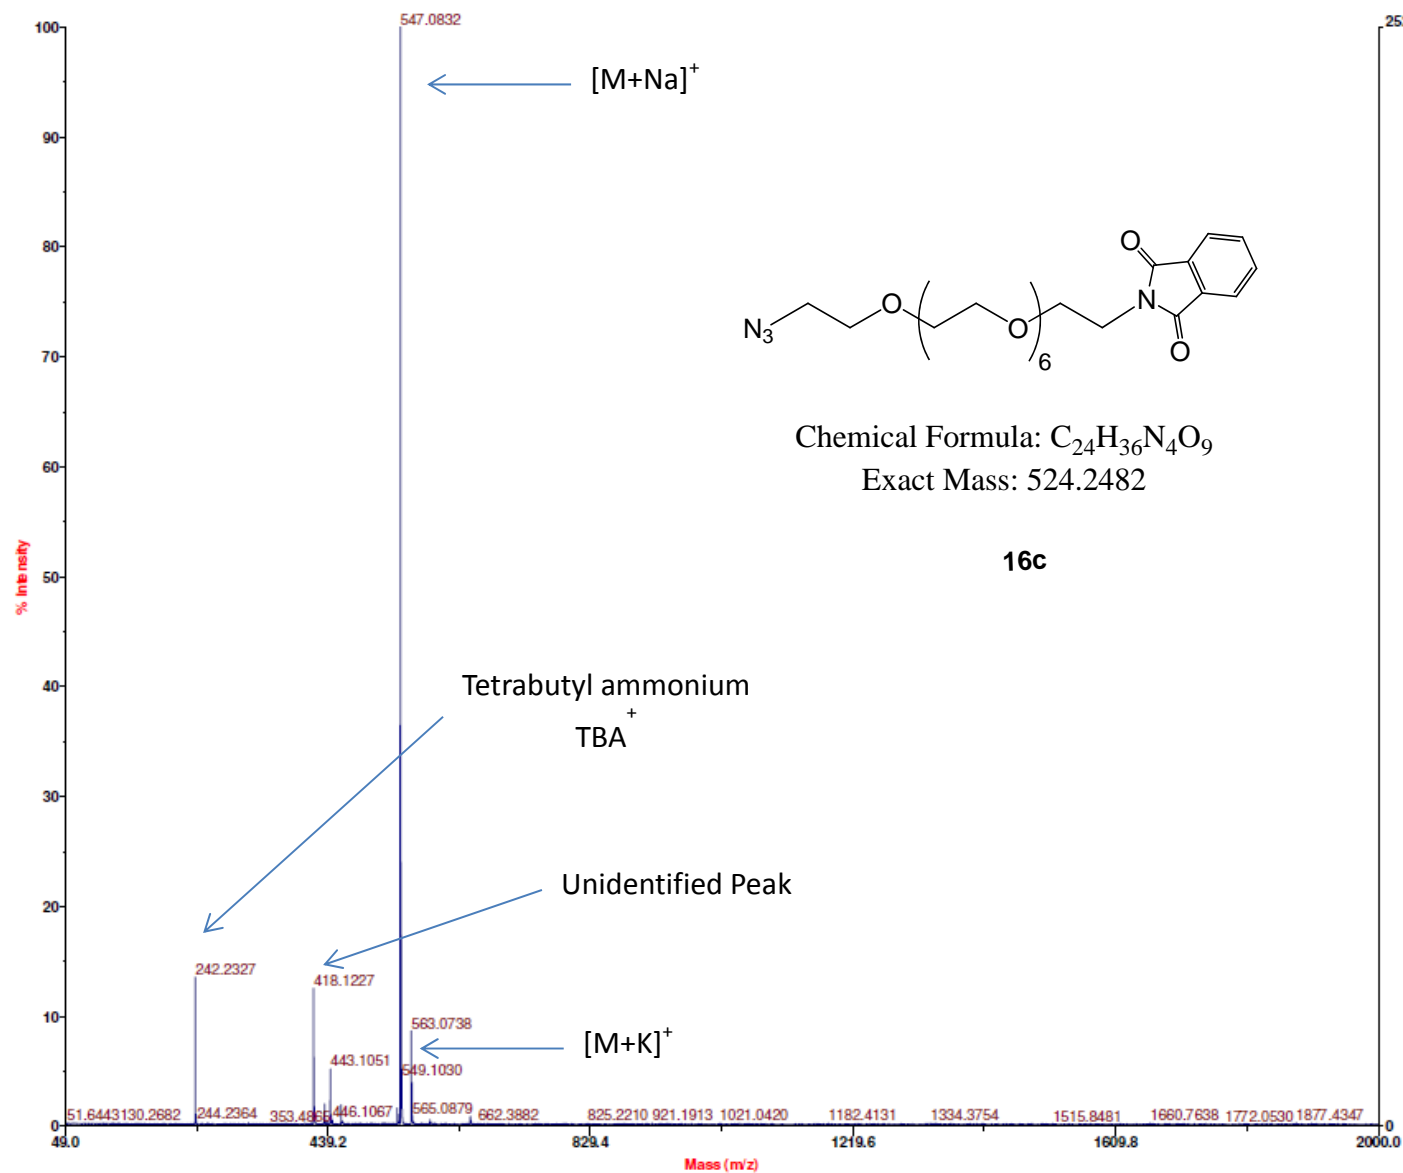

| Parameter                             | Value          |
|---------------------------------------|----------------|
| --> Mariner System State <--          |                |
| Instrument State                      | ON             |
| Ion Polarity                          | POS            |
| Auxiliary Gas                         | ON             |
| Curtain Gas                           | ON             |
| Nebulizer Gas                         | ON             |
| Calibration Constant A                | 5.0146867E-007 |
| Calibration Constant B                | 77.798312      |
| TDC Deadtime                          | 10             |
| --> Source Settings <--               |                |
| Spray Tip Potential                   | 4509.96        |
| SCIEX Heater                          | 300.05         |
| --> API Interface Settings <--        |                |
| Nozzle Potential                      | 120.12         |
| Skimmer 1 Potential                   | 10.01          |
| Quadrupole DC Potential               | 5.49           |
| Deflection Voltage                    | 0.10           |
| Einzel Lens Potential                 | -24.00         |
| Quadrupole RF Voltage                 | 999.76         |
| Quadrupole Temperature                | 140.01         |
| Nozzle Temperature                    | 140.01         |
| --> Analyzer Settings <--             |                |
| Push Pulse Potential                  | 490.00         |
| Pull Pulse Potential                  | 213.11         |
| Pull Bias Potential                   | 10.00          |
| Acceleration Potential                | 3999.94        |
| Reflector Potential                   | 1549.99        |
| Detector Voltage                      | 1700.24        |
| --> Spectrum Acquisition Settings <-- |                |
| Seconds Per Spectrum                  | 1.00           |
| Ion Count Threshold                   | 0.00           |
| First Mass                            | 50.00          |
| Last Mass                             | 2000.00        |
| Accumulate Spectra                    | OFF            |
| Standby at End of Acquisition         | OFF            |
| --> Centroid Spectra Settings <--     |                |
| Centroid Spectra                      | OFF            |
| --> System Settings <--               |                |
| Gas Control Mode                      | Manual         |
| Syringe Pump Mode                     | Manual         |
| Syringe Pump Rate                     | 50.00          |
| Syringe Diameter                      | 3.26           |
| Min Analyzer Mass                     | 50.00          |
| Max Analyzer Mass                     | 4000.00        |

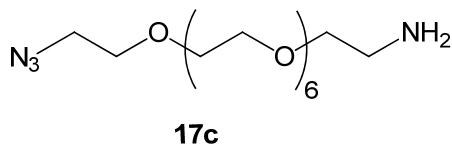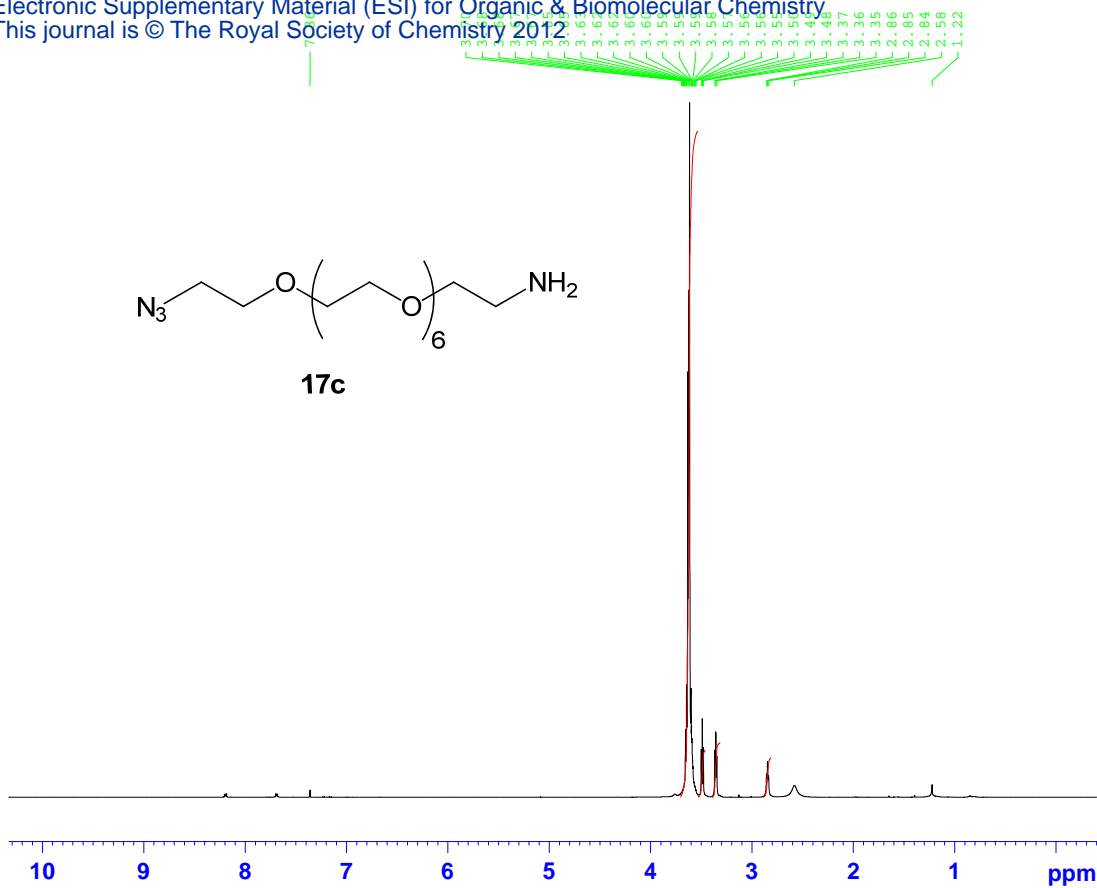

```

NAME      LG-834M_N3-P8-NH2
EXPNO     5
PROCNO    1
Date_     20111201
Time      21.20
INSTRUM   spect
PROBHD    5 mm PABBO BB-
PULPROG   zg30
TD        65536
SOLVENT   CDCl3
NS        64
DS        2
SWH       10000.000 Hz
FIDRES    0.152588 Hz
AQ        3.2769001 sec
RG        11.3
DW        50.000 usec
DE        6.50 usec
TE        300.0 K
D1        1.00000000 sec
TD0       1
    
```

```

===== CHANNEL f1 =====
NUC1      1H
P1        14.75 usec
PL1       1.20 dB
PL1W      17.72078514 W
SFO1      500.1330008 MHz
SI        32768
SF        500.1299631 MHz
WDW       EM
SSB       0
LB        0.30 Hz
GB        0
PC        1.00
    
```

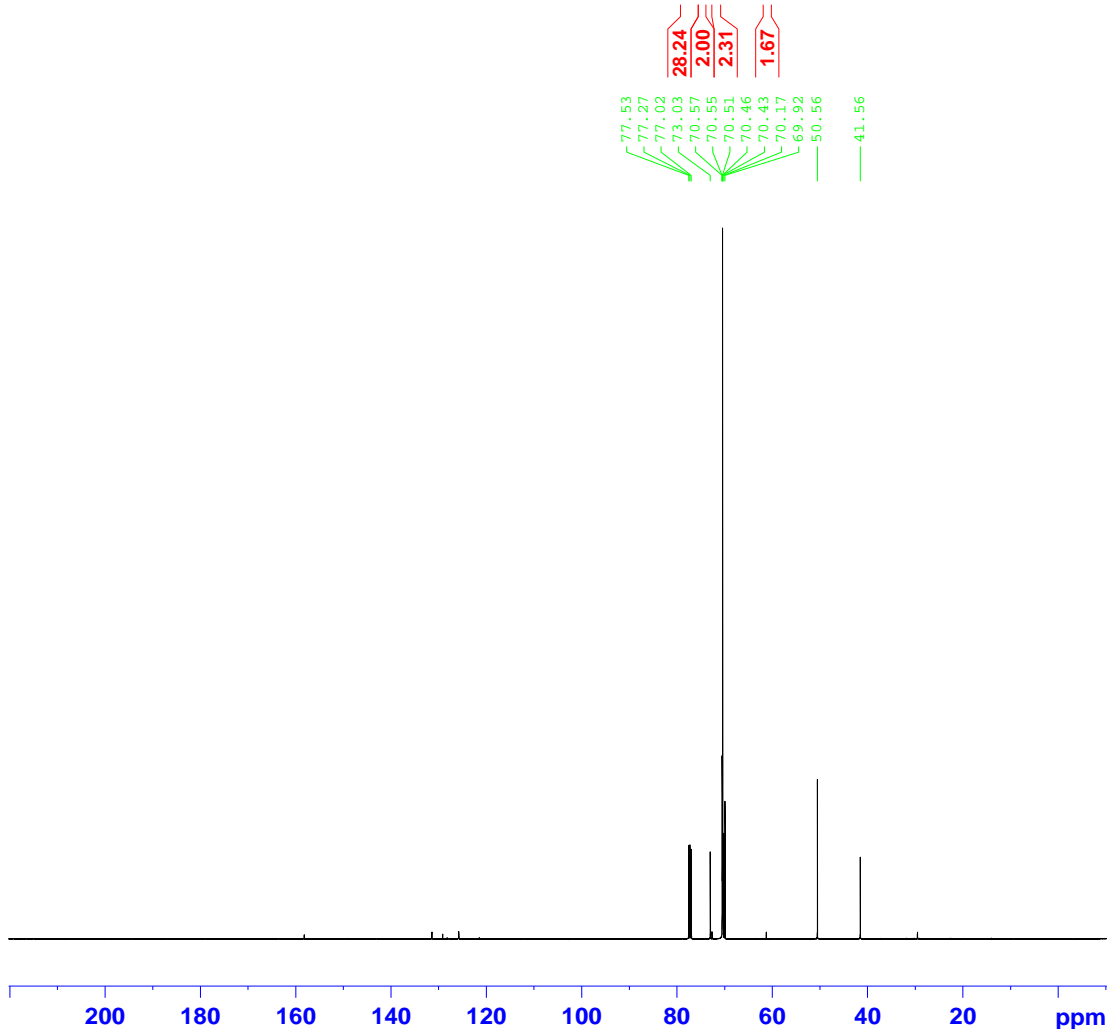

```

NAME      LG-834M_N3-P8-NH2
EXPNO     2
PROCNO    1
Date_     20111201
Time      20.21
INSTRUM   spect
PROBHD    5 mm PABBO BB-
PULPROG   zgpg30
TD        65536
SOLVENT   CDCl3
NS        1024
DS        4
SWH       28985.508 Hz
FIDRES    0.442284 Hz
AQ        1.1305633 sec
RG        4096
DW        17.250 usec
DE        6.50 usec
TE        300.0 K
D1        2.00000000 sec
D11       0.03000000 sec
TD0       1
    
```

```

===== CHANNEL f1 =====
NUC1      13C
P1        8.83 usec
PL1       0.00 dB
PL1W      80.88274384 W
SFO1      125.7709936 MHz
    
```

```

===== CHANNEL f2 =====
CPDPRG2   waltz16
NUC2      1H
PCPD2     80.00 usec
PL2       1.20 dB
PL12      15.40 dB
PL13      15.40 dB
PL2W      17.72078514 W
PL12W     0.67372549 W
PL13W     0.67372549 W
SFO2      500.1320005 MHz
SI        32768
SF        125.7577890 MHz
WDW       EM
SSB       0
LB        1.00 Hz
GB        0
PC        1.40
    
```



Mariner Spec /1:25 (T/0.00:0.43) ASC[BP = 395.2, 5122]

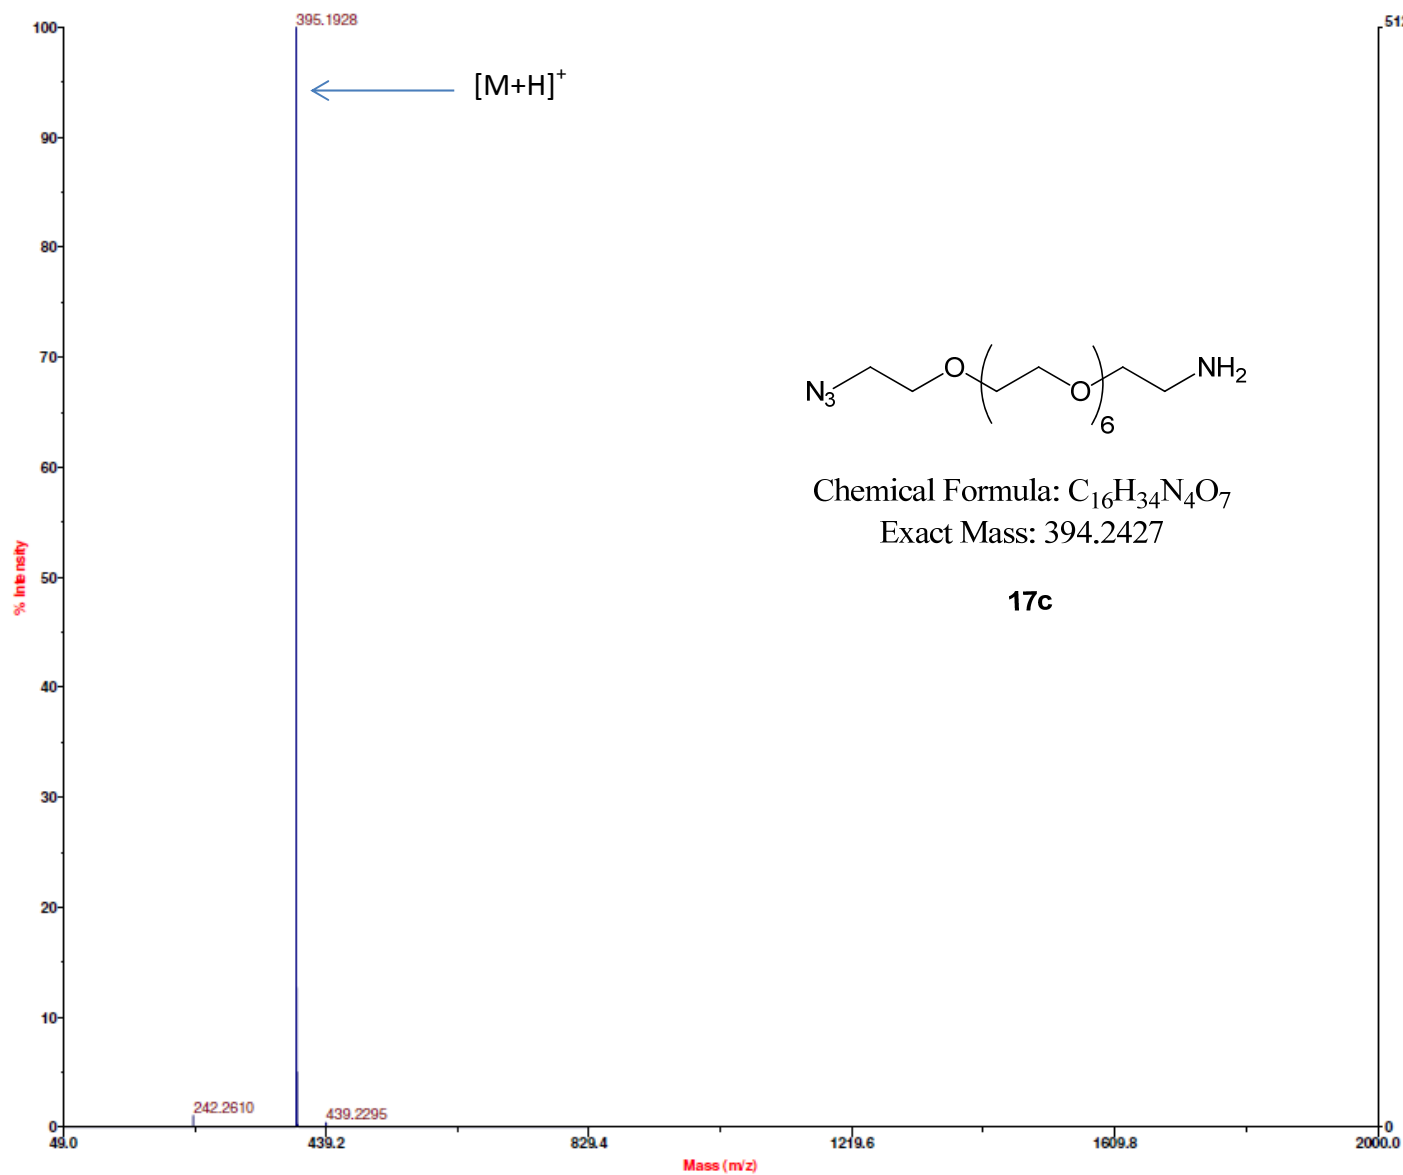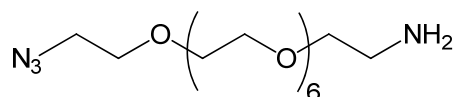

Chemical Formula: C<sub>16</sub>H<sub>34</sub>N<sub>4</sub>O<sub>7</sub>  
Exact Mass: 394.2427

17c

|                                       |                |
|---------------------------------------|----------------|
| --> Mariner System State <--          |                |
| Instrument State                      | ON             |
| Ion Polarity                          | POS            |
| Auxiliary Gas                         | ON             |
| Curtain Gas                           | ON             |
| Nebulizer Gas                         | ON             |
| Calibration Constant A                | 5.0146867E-007 |
| Calibration Constant B                | 77.798312      |
| TDC Deadtime                          | 10             |
| --> Source Settings <--               |                |
| Spray Tip Potential                   | 4509.96        |
| SCIEX Heater                          | 300.05         |
| --> API Interface Settings <--        |                |
| Nozzle Potential                      | 40.04          |
| Skimmer 1 Potential                   | 10.01          |
| Quadrupole DC Potential               | 5.49           |
| Deflection Voltage                    | 0.10           |
| Einzel Lens Potential                 | -24.00         |
| Quadrupole RF Voltage                 | 999.76         |
| Quadrupole Temperature                | 140.01         |
| Nozzle Temperature                    | 140.01         |
| --> Analyzer Settings <--             |                |
| Push Pulse Potential                  | 490.00         |
| Pull Pulse Potential                  | 213.11         |
| Pull Bias Potential                   | 10.00          |
| Acceleration Potential                | 3999.94        |
| Reflector Potential                   | 1549.99        |
| Detector Voltage                      | 1700.24        |
| --> Spectrum Acquisition Settings <-- |                |
| Seconds Per Spectrum                  | 1.00           |
| Ion Count Threshold                   | 0.00           |
| First Mass                            | 50.00          |
| Last Mass                             | 2000.00        |
| Accumulate Spectra                    | OFF            |
| Standby at End of Acquisition         | OFF            |
| --> Centroid Spectra Settings <--     |                |
| Centroid Spectra                      | OFF            |
| --> System Settings <--               |                |
| Gas Control Mode                      | Manual         |
| Syringe Pump Mode                     | Manual         |
| Syringe Pump Rate                     | 50.00          |
| Syringe Diameter                      | 3.26           |
| Min Analyzer Mass                     | 50.00          |
| Max Analyzer Mass                     | 4000.00        |

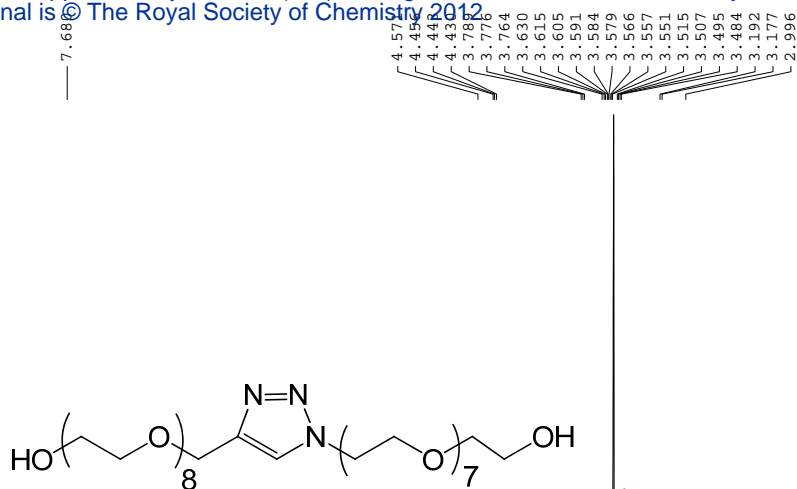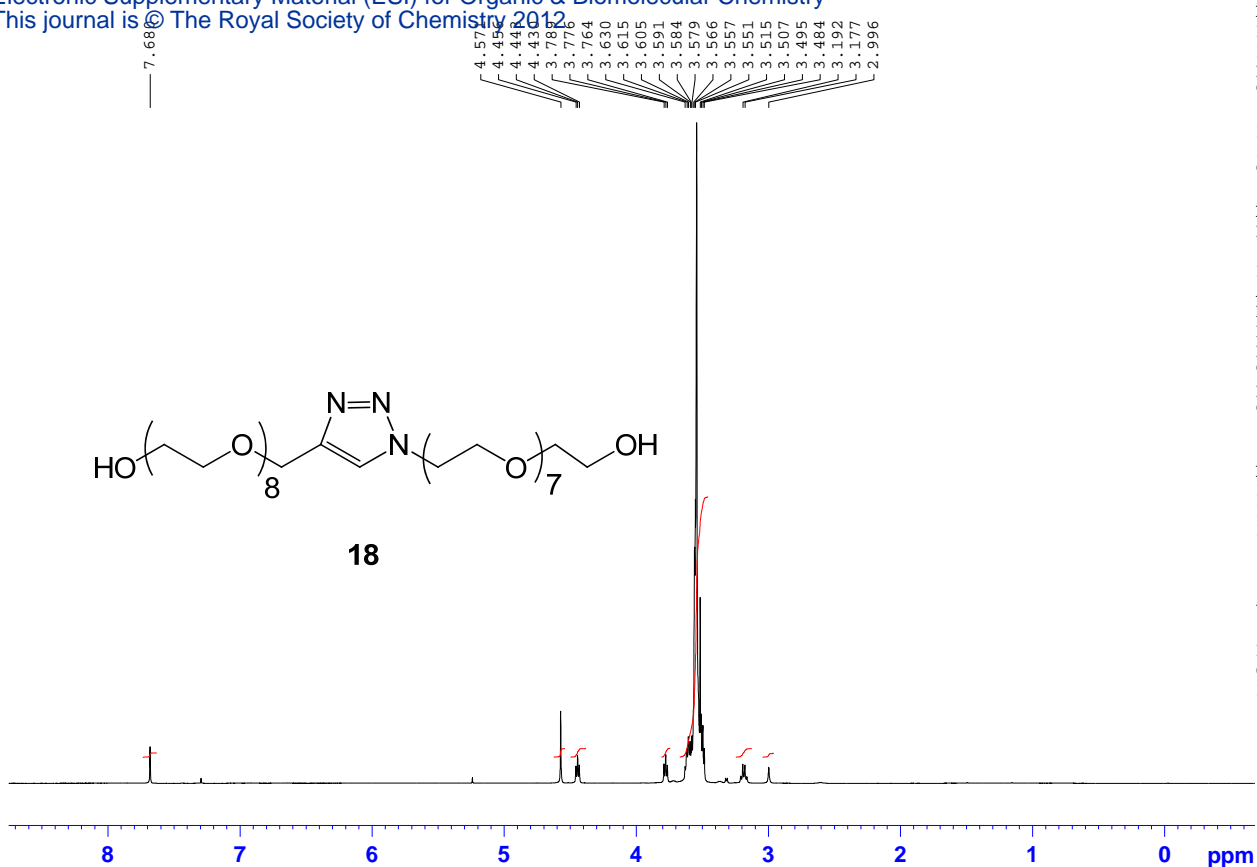

```

NAME LG-959_OH-P16-OH
EXPNO 2
PROCNO 1
Date_ 20120615
Time 18.32
INSTRUM spect
PROBHD 5 mm PABBO BB-
PULPROG zg30
TD 65536
SOLVENT CDCl3
NS 16
DS 2
SWH 8802.817 Hz
FIDRES 0.134320 Hz
AQ 3.7224948 sec
RG 18
DW 56.800 usec
DE 6.50 usec
TE 293.5 K
D1 1.00000000 sec
TD0 1
    
```

```

===== CHANNEL f1 =====
NUC1 1H
P1 14.85 usec
PL1 -0.60 dB
PL1W 13.81451130 W
SFO1 400.1320007 MHz
SI 32768
SF 400.1300000 MHz
WDW EM
SSB 0
LB 0.30 Hz
GB 0
PC 1.00
    
```

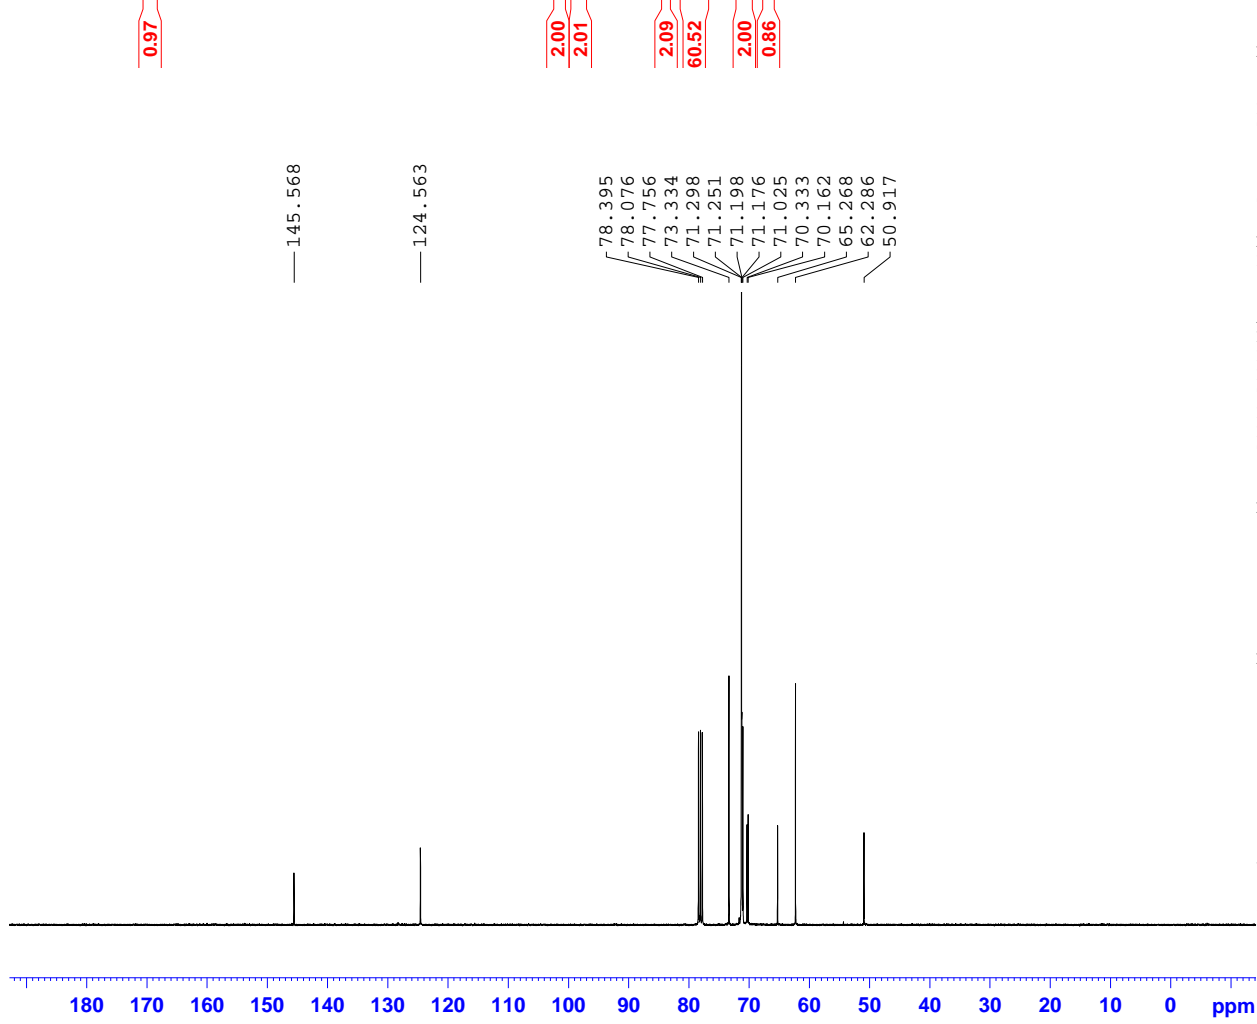

```

NAME LG-959_OH-P16-OH
EXPNO 3
PROCNO 1
Date_ 20120615
Time 19.33
INSTRUM spect
PROBHD 5 mm PABBO BB-
PULPROG zgpg30
TD 65536
SOLVENT CDCl3
NS 1024
DS 4
SWH 24038.461 Hz
FIDRES 0.366798 Hz
AQ 1.3631988 sec
RG 1030
DW 20.800 usec
DE 6.50 usec
TE 296.1 K
D1 2.00000000 sec
D11 0.03000000 sec
TD0 1
    
```

```

===== CHANNEL f1 =====
NUC1 13C
P1 9.99 usec
PL1 -3.00 dB
PL1W 73.67452240 W
SFO1 100.6228298 MHz
    
```

```

===== CHANNEL f2 =====
CPDPRG2 waltz16
NUC2 1H
PCPD2 80.00 usec
PL2 -0.65 dB
PL12 13.40 dB
PL13 13.40 dB
PL2W 13.97447491 W
PL12W 0.54996562 W
PL13W 0.54996562 W
SFO2 400.1316005 MHz
SI 32768
SF 100.6126885 MHz
WDW EM
SSB 0
LB 1.00 Hz
GB 0
PC 1.40
    
```

Mariner Spec /1:24 (T /0.00:0.41) ASC[BP = 826.5, 184]

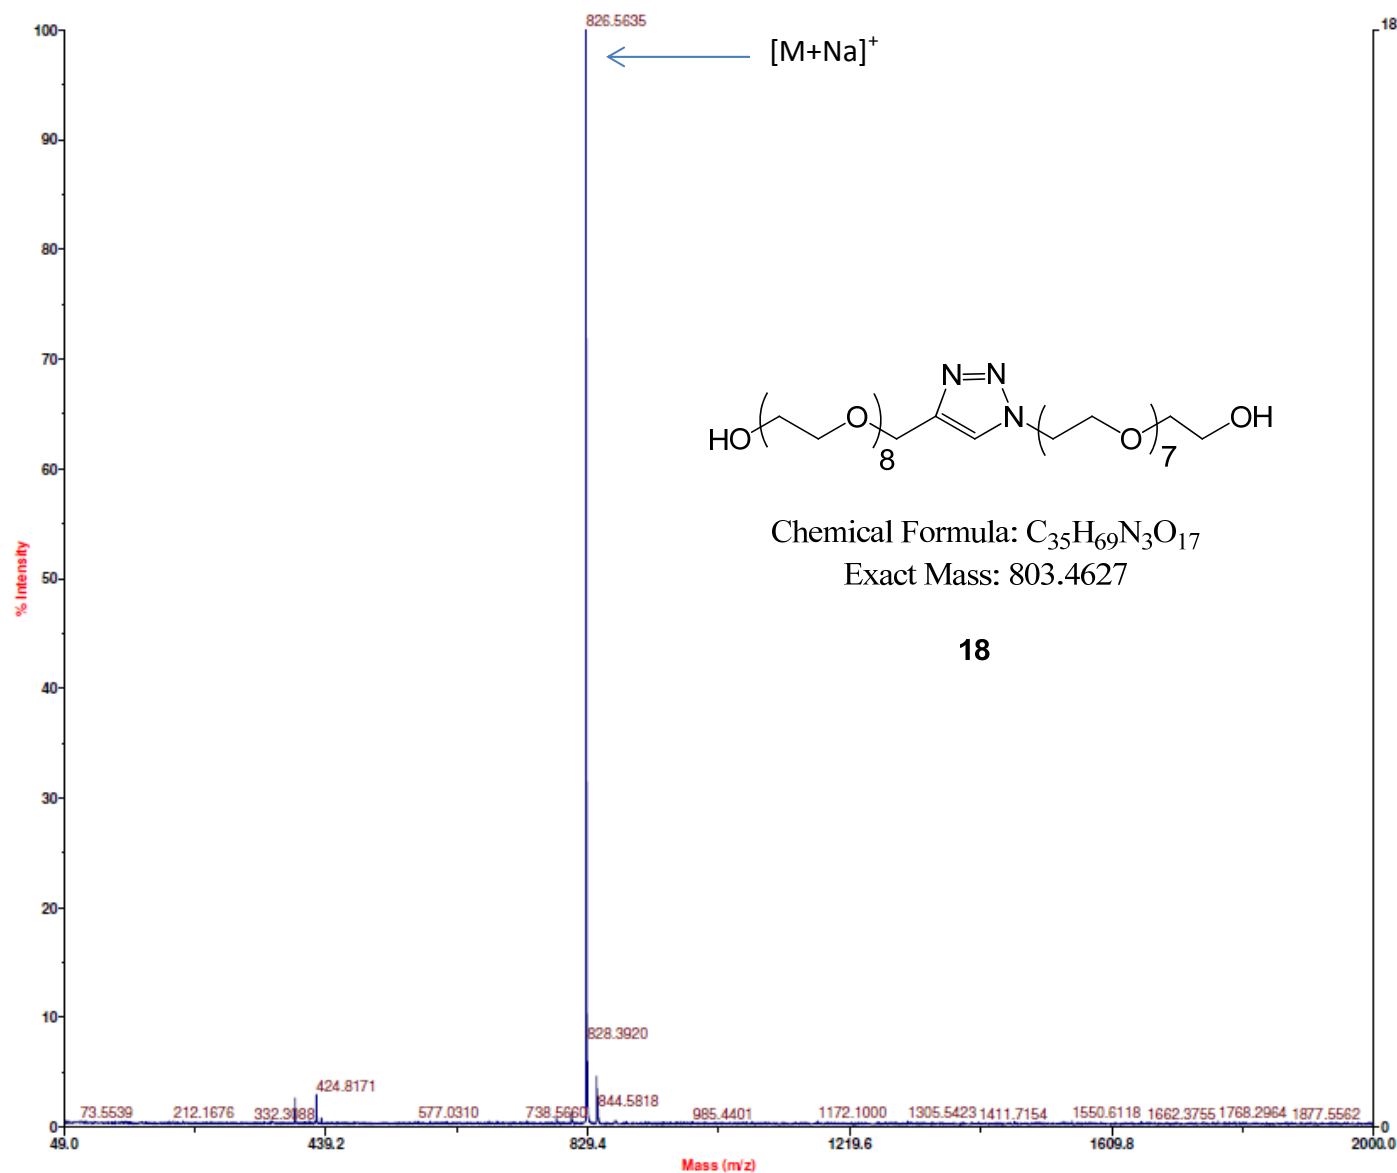

--> Mariner System State <--  
Instrument State ON  
Ion Polarity POS  
Auxillary Gas ON  
Curtain Gas ON  
Nebulizer Gas ON  
Calibration Constant A 5.0149194E-007  
Calibration Constant B 78.267402  
TDC Deadtime 10  
--> Source Settings <--  
Spray Tip Potential 4509.96  
SCIEX Heater 300.05  
--> API Interface Settings <--  
Nozzle Potential 40.04  
Skimmer 1 Potential 10.01  
Quadrupole DC Potential 5.49  
Deflection Voltage 0.10  
Einzel Lens Potential -24.00  
Quadrupole RF Voltage 999.76  
Quadrupole Temperature 140.01  
Nozzle Temperature 140.01  
--> Analyzer Settings <--  
Push Pulse Potential 490.00  
Pull Pulse Potential 213.11  
Pull Bias Potential 10.00  
Acceleration Potential 3999.94  
Reflector Potential 1549.99  
Detector Voltage 1700.24  
--> Spectrum Acquisition Settings <--  
Seconds Per Spectrum 1.00  
Ion Count Threshold 0.00  
First Mass 50.00  
Last Mass 2000.00  
Accumulate Spectra OFF  
Standby at End of Acquisition OFF  
--> Centroid Spectra Settings <--  
Centroid Spectra OFF  
--> System Settings <--  
Gas Control Mode Manual  
Syringe Pump Mode Manual  
Syringe Pump Rate 50.00  
Syringe Diameter 3.26  
Min Analyzer Mass 50.00  
Max Analyzer Mass 4000.00

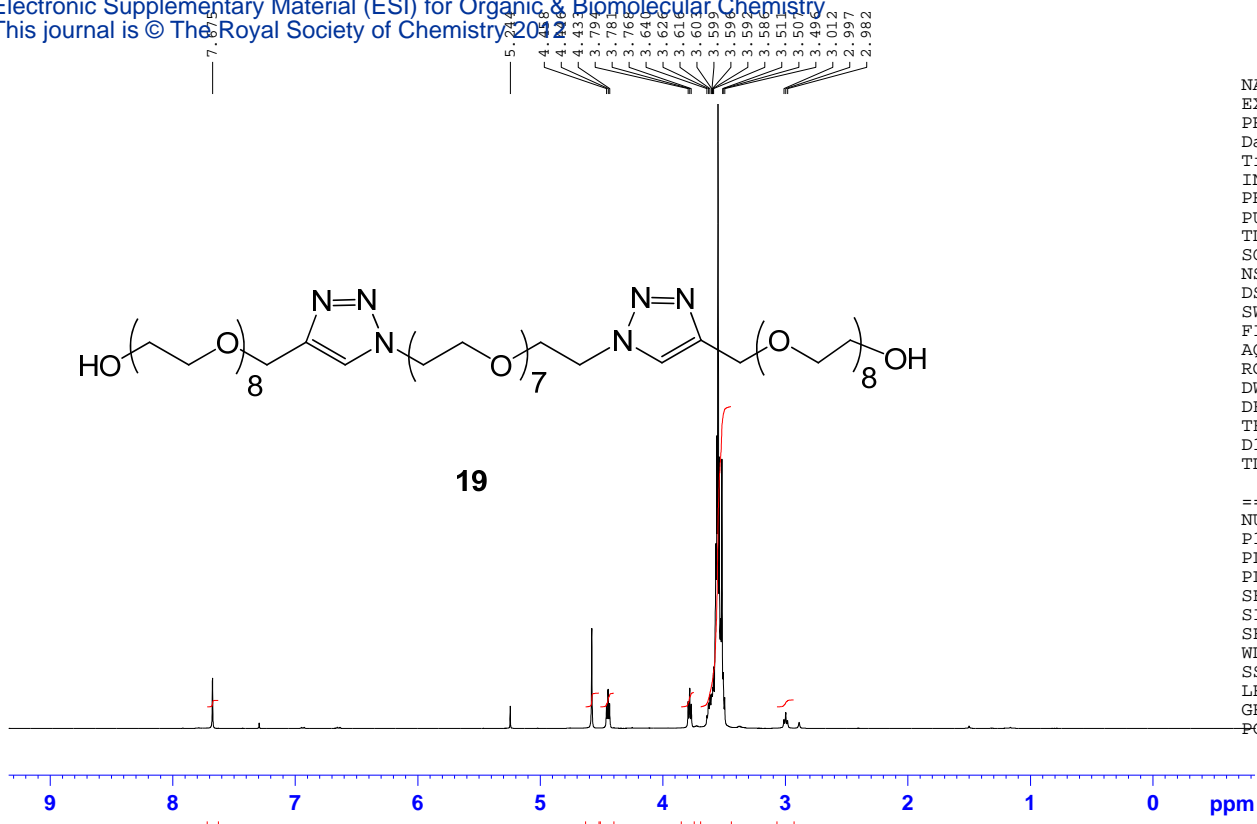

```

NAME      LG-953_OH-P24-OH
EXPNO    2
PROCNO   1
Date_    20120612
Time     18.29
INSTRUM  spect
PROBHD   5 mm PABBO BB-
PULPROG  zg30
TD       65536
SOLVENT  CDC13
NS       16
DS       2
SWH      8802.817 Hz
FIDRES   0.134320 Hz
AQ       3.7224948 sec
RG       18
DW       56.800 usec
DE       6.50 usec
TE       293.9 K
D1       1.00000000 sec
TD0      1
    
```

```

===== CHANNEL f1 =====
NUC1     1H
P1       14.85 usec
PL1     -0.60 dB
PL1W    13.81451130 W
SF01    400.1320007 MHz
SI       32768
SF       400.1300000 MHz
WDW      EM
SSB      0
LB       0.30 Hz
GB       0
PC       1.00
    
```

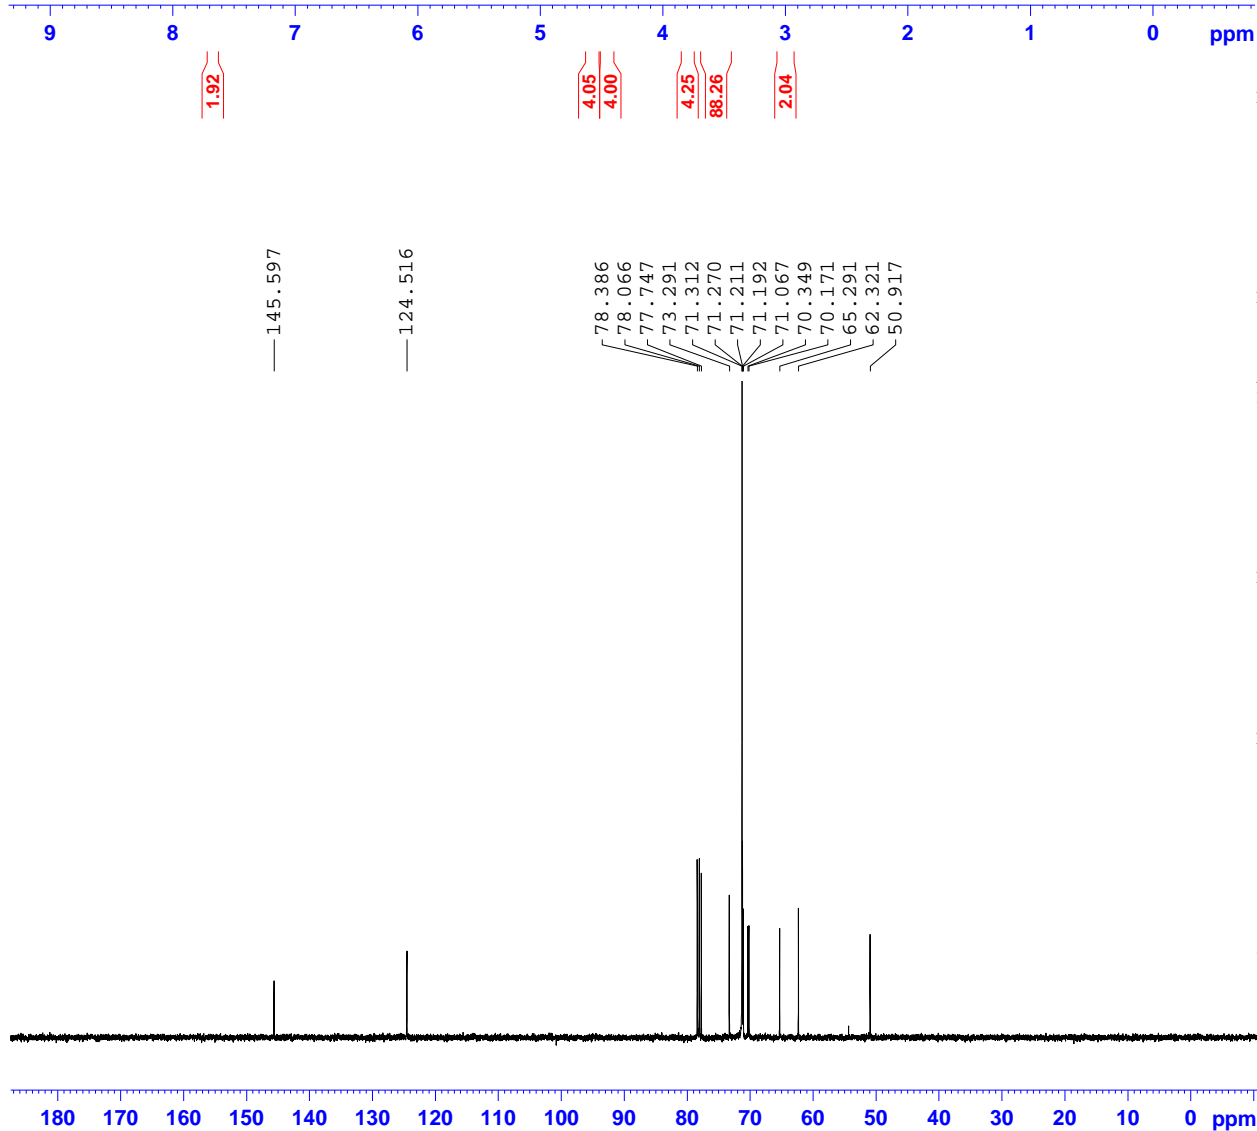

```

NAME      LG-953_OH-P24-OH
EXPNO    3
PROCNO   1
Date_    20120613
Time     1.33
INSTRUM  spect
PROBHD   5 mm PABBO BB-
PULPROG  zgpg30
TD       65536
SOLVENT  CDC13
NS       1024
DS       4
SWH      24038.461 Hz
FIDRES   0.366798 Hz
AQ       1.3631988 sec
RG       1
DW       20.800 usec
DE       6.50 usec
TE       296.0 K
D1       2.00000000 sec
D11      0.03000000 sec
TD0      1
    
```

```

===== CHANNEL f1 =====
NUC1     13C
P1       9.99 usec
PL1     -3.00 dB
PL1W    73.67452240 W
SF01    100.6228298 MHz

===== CHANNEL f2 =====
CPDPRG2  waltz16
NUC2     1H
PCPD2    80.00 usec
PL2     -0.65 dB
PL12    13.40 dB
PL13    13.40 dB
PL2W    13.97447491 W
PL12W   0.54996562 W
PL13W   0.54996562 W
SF02    400.1316005 MHz
SI       32768
SF       100.6126885 MHz
WDW      EM
SSB      0
LB       1.00 Hz
GB       0
PC       1.40
    
```

# Applied Biosystems Mariner System 5219

Mariner Spec /1:29 (T /0.00:0.50) ASC[BP = 1260.7, 86]

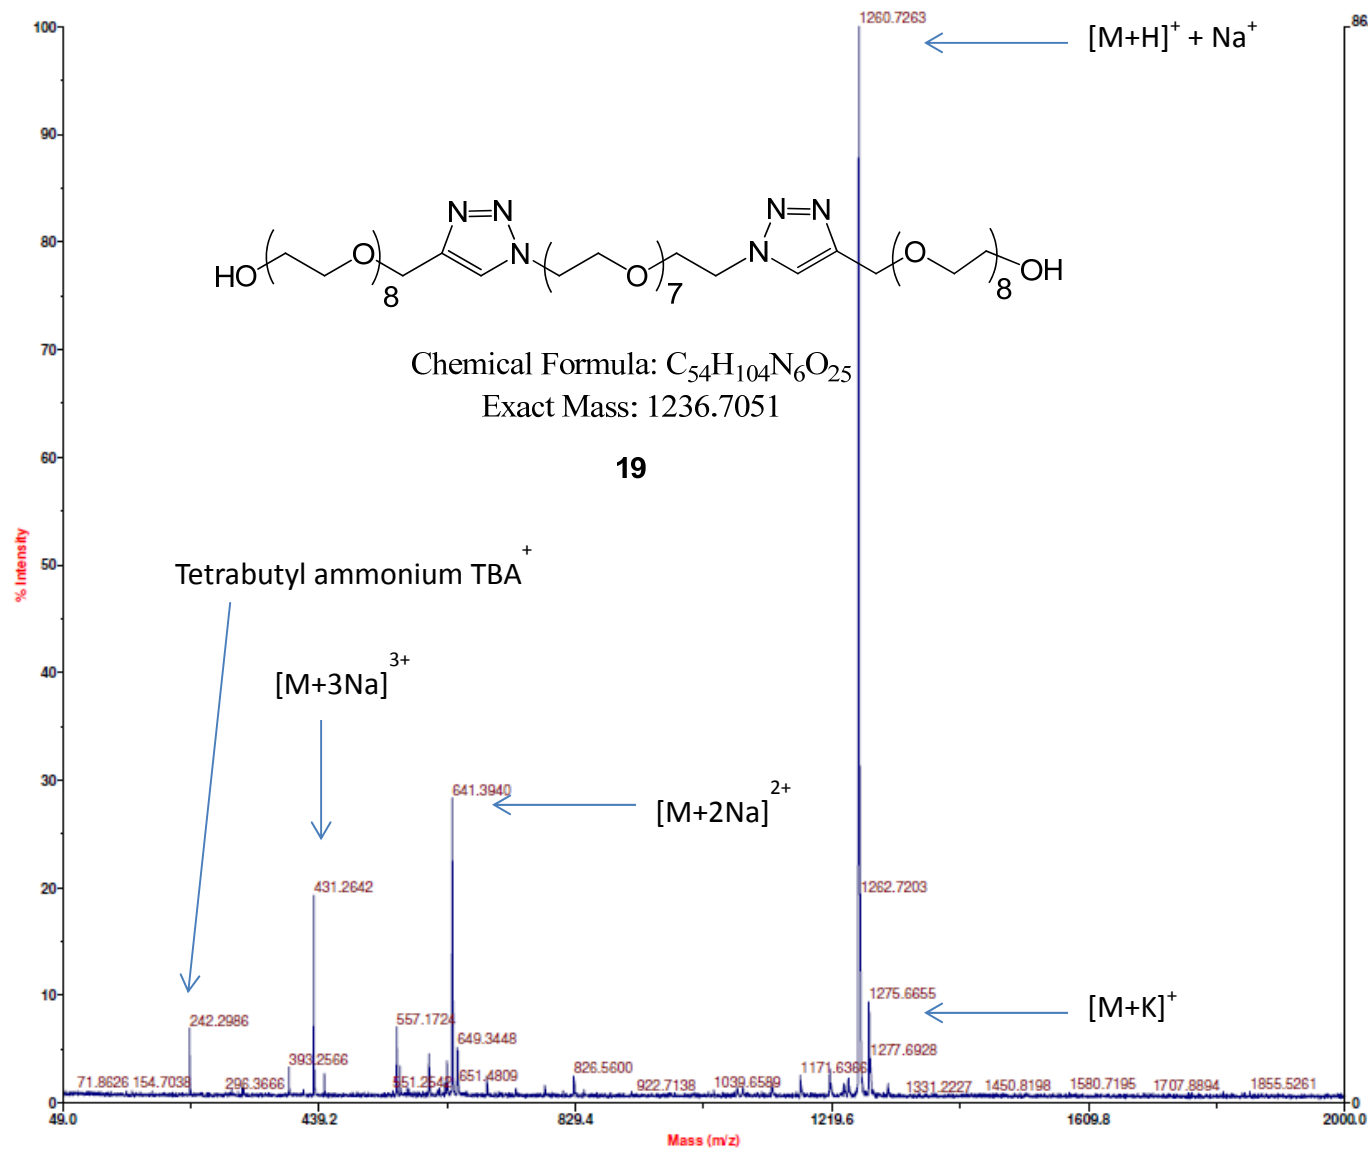

--> Mariner System State <--

|                                       |                |
|---------------------------------------|----------------|
| Instrument State                      | ON             |
| Ion Polarity                          | POS            |
| Auxiliary Gas                         | ON             |
| Curtain Gas                           | ON             |
| Nebulizer Gas                         | ON             |
| Calibration Constant A                | 5.0149194E-007 |
| Calibration Constant B                | 78.267402      |
| TDC Deadtime                          | 10             |
| --> Source Settings <--               |                |
| Spray Tip Potential                   | 4509.96        |
| SCIEX Heater                          | 300.05         |
| --> API Interface Settings <--        |                |
| Nozzle Potential                      | 40.04          |
| Skimmer 1 Potential                   | 10.01          |
| Quadrupole DC Potential               | 5.49           |
| Deflection Voltage                    | 0.10           |
| Einzel Lens Potential                 | -24.00         |
| Quadrupole RF Voltage                 | 999.76         |
| Quadrupole Temperature                | 140.01         |
| Nozzle Temperature                    | 140.01         |
| --> Analyzer Settings <--             |                |
| Push Pulse Potential                  | 490.00         |
| Pull Pulse Potential                  | 213.11         |
| Pull Bias Potential                   | 10.00          |
| Acceleration Potential                | 3999.94        |
| Reflector Potential                   | 1549.99        |
| Detector Voltage                      | 1700.24        |
| --> Spectrum Acquisition Settings <-- |                |
| Seconds Per Spectrum                  | 1.00           |
| Ion Count Threshold                   | 0.00           |
| First Mass                            | 50.00          |
| Last Mass                             | 2000.00        |
| Accumulate Spectra                    | OFF            |
| Standby at End of Acquisition         | OFF            |
| --> Centroid Spectra Settings <--     |                |
| Centroid Spectra                      | OFF            |
| --> System Settings <--               |                |
| Gas Control Mode                      | Manual         |
| Syringe Pump Mode                     | Manual         |
| Syringe Pump Rate                     | 50.00          |
| Syringe Diameter                      | 3.26           |
| Min Analyzer Mass                     | 50.00          |
| Max Analyzer Mass                     | 4000.00        |

Acquired: Jun 12 14:00:00 2012  
Mariner Mass Spectrum  
C:\Mariner\Data\2012\June\12 Tue\LNG-953A002.dat

Printed: 14:02, June 12, 2012

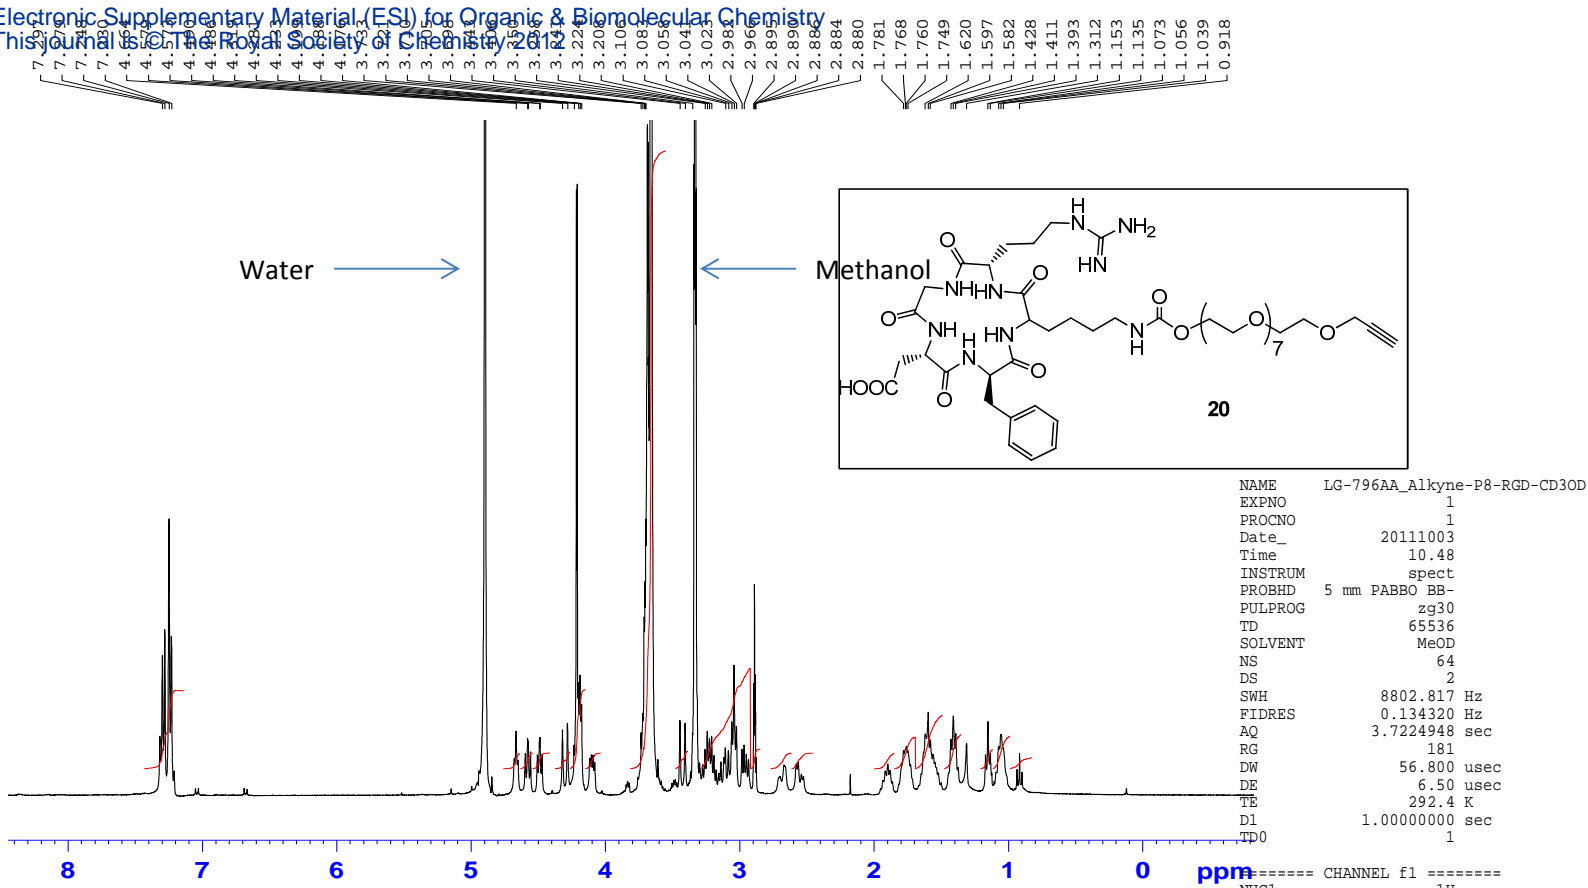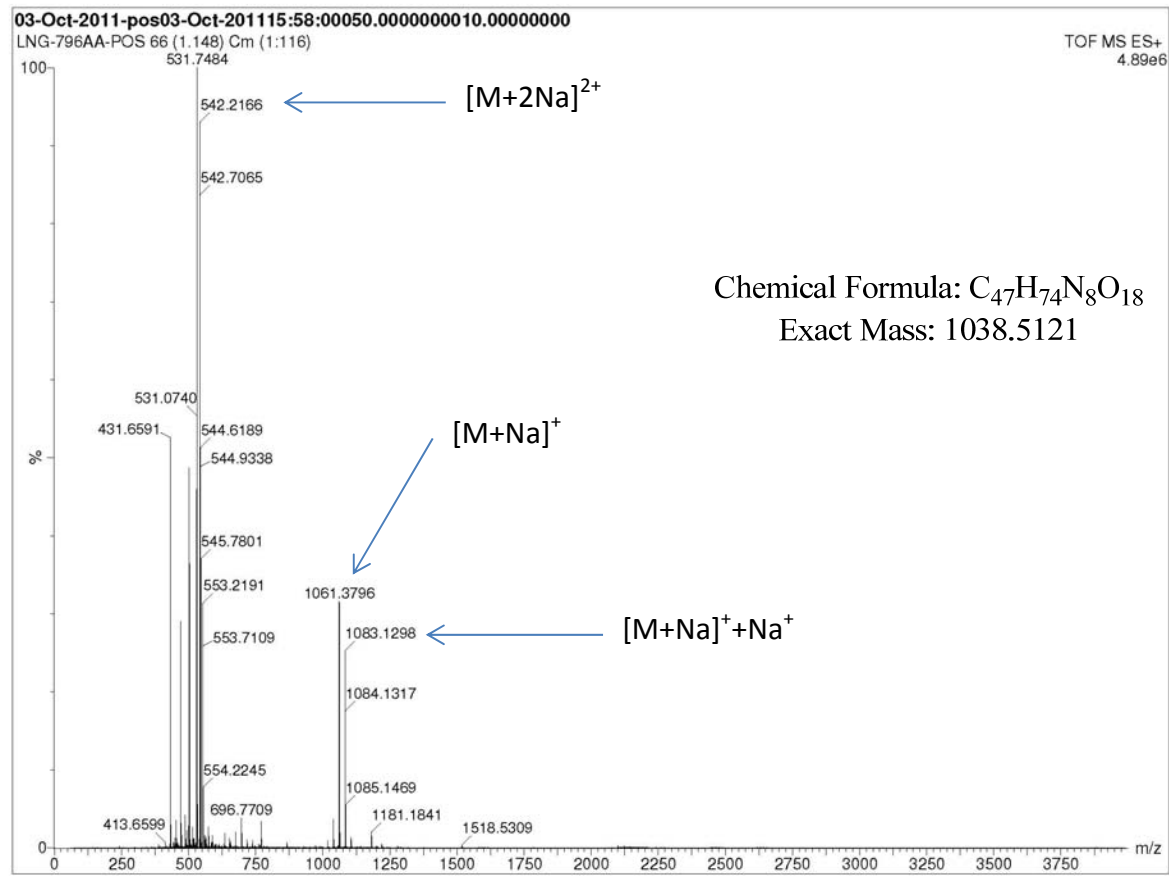

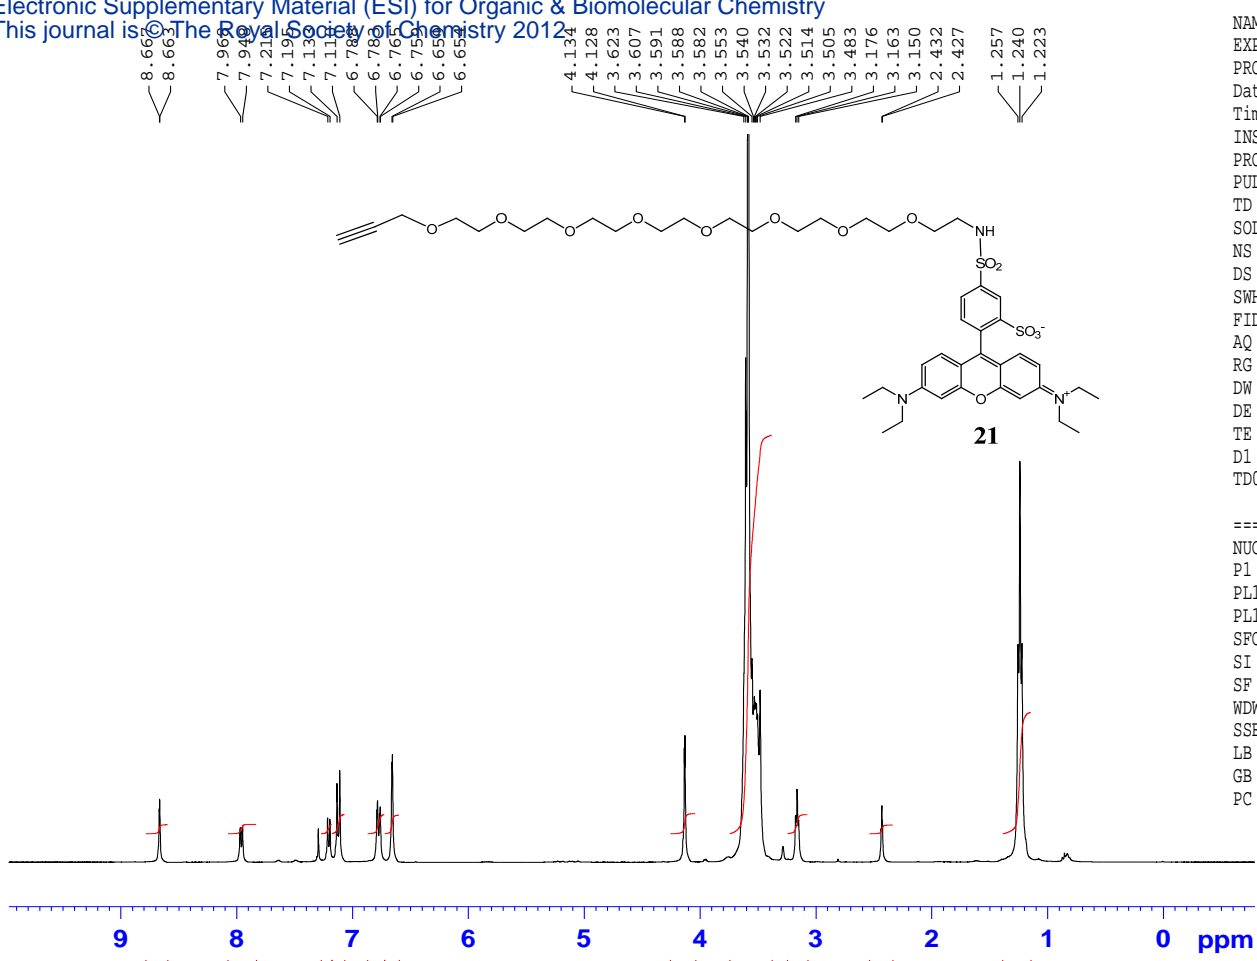

```

NAME LG-785_Alkyne-P8-Rhoda
EXPNO 1
PROCNO 1
Date_ 20110915
Time 17.57
INSTRUM spect
PROBHD 5 mm PABBO BB-
PULPROG zg30
TD 65536
SOLVENT CDCl3
NS 64
DS 2
SWH 8802.817 Hz
FIDRES 0.134320 Hz
AQ 3.7224948 sec
RG 71.8
DW 56.800 usec
DE 6.50 usec
TE 292.6 K
D1 1.00000000 sec
TD0 1
    
```

```

===== CHANNEL f1 =====
NUC1 1H
P1 14.85 usec
PL1 -0.60 dB
PL1W 13.81451130 W
SFO1 400.1320007 MHz
SI 32768
SF 400.1300000 MHz
WDW EM
SSB 0
LB 0.30 Hz
GB 0
PC 1.00
    
```

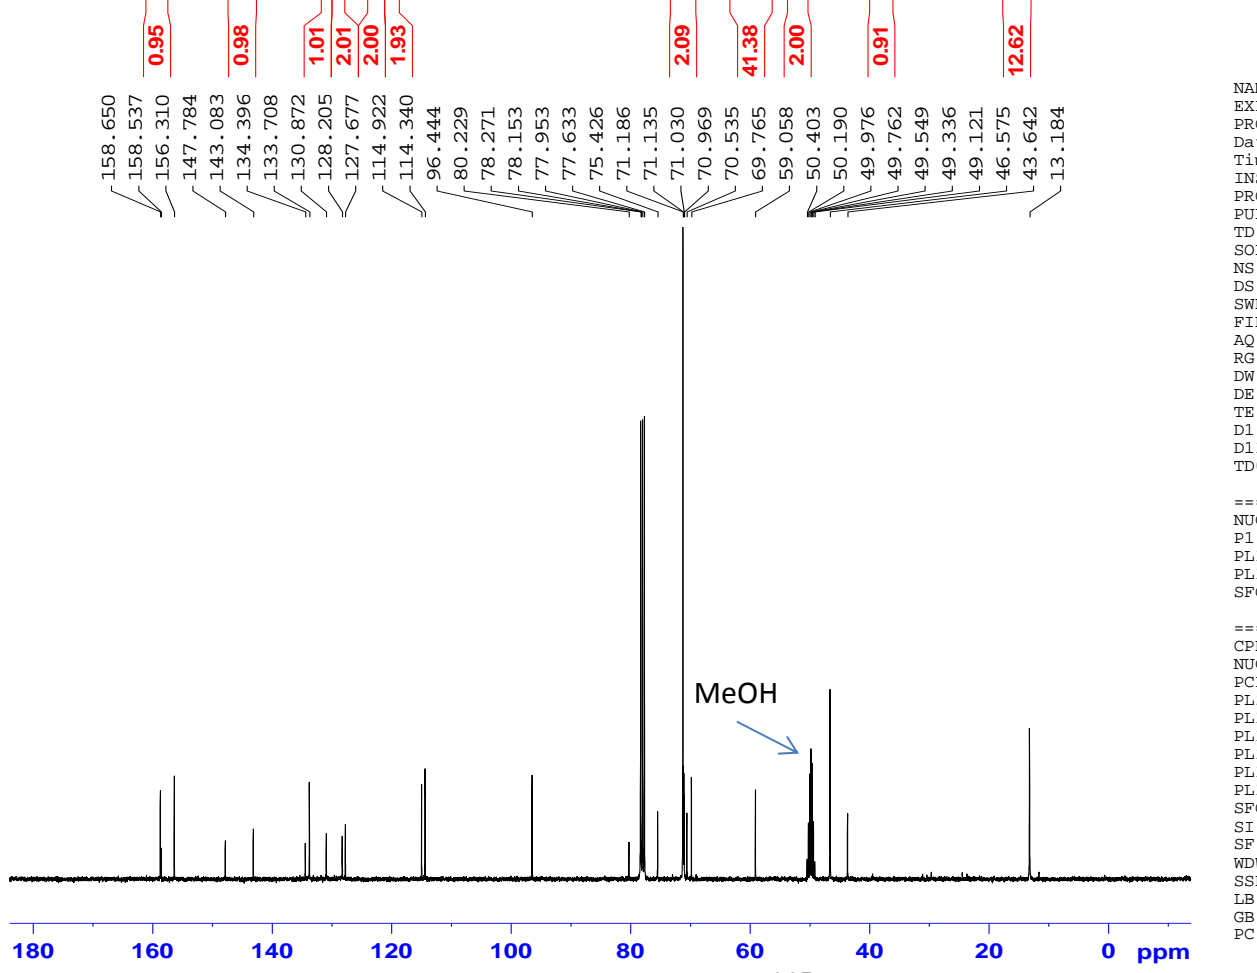

```

NAME LG-785_Alkyne-P8-Rhoda
EXPNO 2
PROCNO 1
Date_ 20110915
Time 19.53
INSTRUM spect
PROBHD 5 mm PABBO BB-
PULPROG zgpg30
TD 65536
SOLVENT CDCl3
NS 2000
DS 4
SWH 24038.461 Hz
FIDRES 0.366798 Hz
AQ 1.3631988 sec
RG 1820
DW 20.800 usec
DE 6.50 usec
TE 294.5 K
D1 2.00000000 sec
D11 0.03000000 sec
TD0 1
    
```

```

===== CHANNEL f1 =====
NUC1 13C
P1 9.99 usec
PL1 -3.00 dB
PL1W 73.67452240 W
SFO1 100.6228298 MHz
    
```

```

===== CHANNEL f2 =====
CPDPRG2 waltz16
NUC2 1H
PCPD2 80.00 usec
PL2 -0.65 dB
PL12 13.40 dB
PL13 13.40 dB
PL2W 13.97447491 W
PL12W 0.54996562 W
PL13W 0.54996562 W
SFO2 400.1316005 MHz
SI 32768
SF 100.6126885 MHz
WDW EM
SSB 0
LB 1.00 Hz
GB 0
PC 1.40
    
```

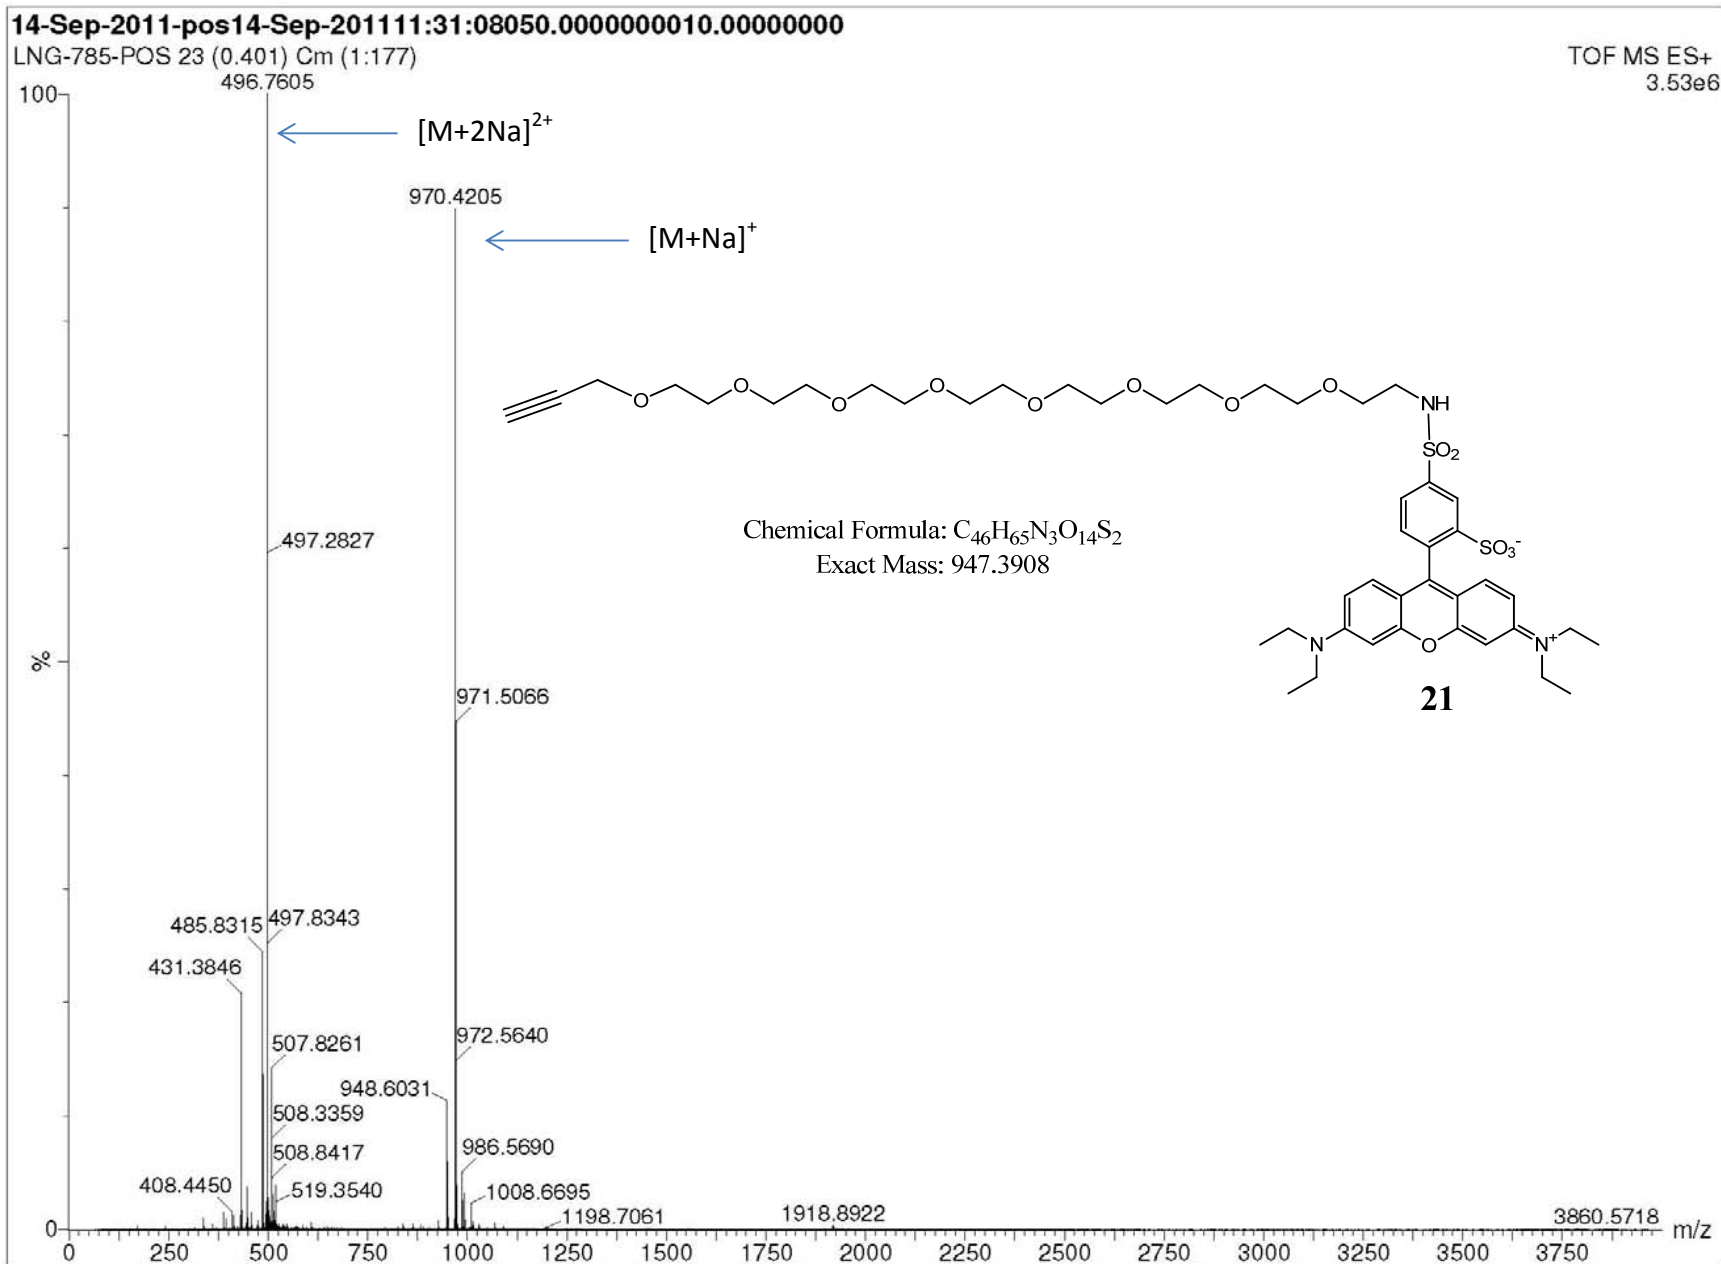

Supplement: c2ob26968f.pdf [file c2ob26968f.pdf]
